# Supplementary material for: Systematic characterization of the composition and dynamics of processing body-associated mRNAs
Source: Research Square preprint supplement (doi:10.21203/rs.3.rs-5354706/v1), 2024-12-04
Supplement: Supplementary file 1 [file Supplementary Table 1.xlsx]

## Sheet: Sheet 1
Supplementary Table 1: Nucleotide sequence of fusion proteins used in this paper
Fusion protein	DNA sequence (5' > 3')
APOBEC1-MYC-T2A-EGFP	ATGAGCTCAGAGACTGGCCCAGTGGCTGTGGACCCCACATTGAGACGGCGGATCGAGCCCCATGAGTTTGAGGTATTCTTCGATCCGAGAGAGCTCCGCAAGGAGACCTGCCTGCTTTACGAAATTAATTGGGGGGGCCGGCACTCCATTTGGCGACATACATCACAGAACACTAACAAGCACGTCGAAGTCAACTTCATCGAGAAGTTCACGACAGAAAGATATTTCTGTCCGAACACAAGGTGCAGCATTACCTGGTTTCTCAGCTGGAGCCCATGCGGCGAATGTAGTAGGGCCATCACTGAATTCCTGTCAAGGTATCCCCACGTCACTCTGTTTATTTACATCGCAAGGCTGTACCACCACGCTGACCCCCGCAATCGACAAGGCCTGCGGGAT…
APOBEC1-DDX6-MYC-T2A-EGFP	ATGAGCTCAGAGACTGGCCCAGTGGCTGTGGACCCCACATTGAGACGGCGGATCGAGCCCCATGAGTTTGAGGTATTCTTCGATCCGAGAGAGCTCCGCAAGGAGACCTGCCTGCTTTACGAAATTAATTGGGGGGGCCGGCACTCCATTTGGCGACATACATCACAGAACACTAACAAGCACGTCGAAGTCAACTTCATCGAGAAGTTCACGACAGAAAGATATTTCTGTCCGAACACAAGGTGCAGCATTACCTGGTTTCTCAGCTGGAGCCCATGCGGCGAATGTAGTAGGGCCATCACTGAATTCCTGTCAAGGTATCCCCACGTCACTCTGTTTATTTACATCGCAAGGCTGTACCACCACGCTGACCCCCGCAATCGACAAGGCCTGCGGGAT…
APOBEC1-LSM14A-MYC-T2A-EGFP	ATGAGCTCAGAGACTGGCCCAGTGGCTGTGGACCCCACATTGAGACGGCGGATCGAGCCCCATGAGTTTGAGGTATTCTTCGATCCGAGAGAGCTCCGCAAGGAGACCTGCCTGCTTTACGAAATTAATTGGGGGGGCCGGCACTCCATTTGGCGACATACATCACAGAACACTAACAAGCACGTCGAAGTCAACTTCATCGAGAAGTTCACGACAGAAAGATATTTCTGTCCGAACACAAGGTGCAGCATTACCTGGTTTCTCAGCTGGAGCCCATGCGGCGAATGTAGTAGGGCCATCACTGAATTCCTGTCAAGGTATCCCCACGTCACTCTGTTTATTTACATCGCAAGGCTGTACCACCACGCTGACCCCCGCAATCGACAAGGCCTGCGGGAT…
APOBEC1-4E-T-MYC-T2A-EGFP	ATGAGCTCAGAGACTGGCCCAGTGGCTGTGGACCCCACATTGAGACGGCGGATCGAGCCCCATGAGTTTGAGGTATTCTTCGATCCGAGAGAGCTCCGCAAGGAGACCTGCCTGCTTTACGAAATTAATTGGGGGGGCCGGCACTCCATTTGGCGACATACATCACAGAACACTAACAAGCACGTCGAAGTCAACTTCATCGAGAAGTTCACGACAGAAAGATATTTCTGTCCGAACACAAGGTGCAGCATTACCTGGTTTCTCAGCTGGAGCCCATGCGGCGAATGTAGTAGGGCCATCACTGAATTCCTGTCAAGGTATCCCCACGTCACTCTGTTTATTTACATCGCAAGGCTGTACCACCACGCTGACCCCCGCAATCGACAAGGCCTGCGGGAT…
APOBEC1-PATL1-MYC-T2A-EGFP	ATGAGCTCAGAGACTGGCCCAGTGGCTGTGGACCCCACATTGAGACGGCGGATCGAGCCCCATGAGTTTGAGGTATTCTTCGATCCGAGAGAGCTCCGCAAGGAGACCTGCCTGCTTTACGAAATTAATTGGGGGGGCCGGCACTCCATTTGGCGACATACATCACAGAACACTAACAAGCACGTCGAAGTCAACTTCATCGAGAAGTTCACGACAGAAAGATATTTCTGTCCGAACACAAGGTGCAGCATTACCTGGTTTCTCAGCTGGAGCCCATGCGGCGAATGTAGTAGGGCCATCACTGAATTCCTGTCAAGGTATCCCCACGTCACTCTGTTTATTTACATCGCAAGGCTGTACCACCACGCTGACCCCCGCAATCGACAAGGCCTGCGGGAT…
APOBEC1-EDC4-MYC-T2A-EGFP	ATGAGCTCAGAGACTGGCCCAGTGGCTGTGGACCCCACATTGAGACGGCGGATCGAGCCCCATGAGTTTGAGGTATTCTTCGATCCGAGAGAGCTCCGCAAGGAGACCTGCCTGCTTTACGAAATTAATTGGGGGGGCCGGCACTCCATTTGGCGACATACATCACAGAACACTAACAAGCACGTCGAAGTCAACTTCATCGAGAAGTTCACGACAGAAAGATATTTCTGTCCGAACACAAGGTGCAGCATTACCTGGTTTCTCAGCTGGAGCCCATGCGGCGAATGTAGTAGGGCCATCACTGAATTCCTGTCAAGGTATCCCCACGTCACTCTGTTTATTTACATCGCAAGGCTGTACCACCACGCTGACCCCCGCAATCGACAAGGCCTGCGGGAT…
APOBEC1-EDC3-MYC-T2A-EGFP	ATGAGCTCAGAGACTGGCCCAGTGGCTGTGGACCCCACATTGAGACGGCGGATCGAGCCCCATGAGTTTGAGGTATTCTTCGATCCGAGAGAGCTCCGCAAGGAGACCTGCCTGCTTTACGAAATTAATTGGGGGGGCCGGCACTCCATTTGGCGACATACATCACAGAACACTAACAAGCACGTCGAAGTCAACTTCATCGAGAAGTTCACGACAGAAAGATATTTCTGTCCGAACACAAGGTGCAGCATTACCTGGTTTCTCAGCTGGAGCCCATGCGGCGAATGTAGTAGGGCCATCACTGAATTCCTGTCAAGGTATCCCCACGTCACTCTGTTTATTTACATCGCAAGGCTGTACCACCACGCTGACCCCCGCAATCGACAAGGCCTGCGGGAT…
APOBEC1-DCP2-MYC-T2A-EGFP	ATGAGCTCAGAGACTGGCCCAGTGGCTGTGGACCCCACATTGAGACGGCGGATCGAGCCCCATGAGTTTGAGGTATTCTTCGATCCGAGAGAGCTCCGCAAGGAGACCTGCCTGCTTTACGAAATTAATTGGGGGGGCCGGCACTCCATTTGGCGACATACATCACAGAACACTAACAAGCACGTCGAAGTCAACTTCATCGAGAAGTTCACGACAGAAAGATATTTCTGTCCGAACACAAGGTGCAGCATTACCTGGTTTCTCAGCTGGAGCCCATGCGGCGAATGTAGTAGGGCCATCACTGAATTCCTGTCAAGGTATCCCCACGTCACTCTGTTTATTTACATCGCAAGGCTGTACCACCACGCTGACCCCCGCAATCGACAAGGCCTGCGGGAT…
APOBEC1-CNOT1-R-MYC-T2A-EGFP	ATGAGCTCAGAGACTGGCCCAGTGGCTGTGGACCCCACATTGAGACGGCGGATCGAGCCCCATGAGTTTGAGGTATTCTTCGATCCGAGAGAGCTCCGCAAGGAGACCTGCCTGCTTTACGAAATTAATTGGGGGGGCCGGCACTCCATTTGGCGACATACATCACAGAACACTAACAAGCACGTCGAAGTCAACTTCATCGAGAAGTTCACGACAGAAAGATATTTCTGTCCGAACACAAGGTGCAGCATTACCTGGTTTCTCAGCTGGAGCCCATGCGGCGAATGTAGTAGGGCCATCACTGAATTCCTGTCAAGGTATCCCCACGTCACTCTGTTTATTTACATCGCAAGGCTGTACCACCACGCTGACCCCCGCAATCGACAAGGCCTGCGGGAT…
APOBEC1-CNOT10-MYC-T2A-EGFP	ATGAGCTCAGAGACTGGCCCAGTGGCTGTGGACCCCACATTGAGACGGCGGATCGAGCCCCATGAGTTTGAGGTATTCTTCGATCCGAGAGAGCTCCGCAAGGAGACCTGCCTGCTTTACGAAATTAATTGGGGGGGCCGGCACTCCATTTGGCGACATACATCACAGAACACTAACAAGCACGTCGAAGTCAACTTCATCGAGAAGTTCACGACAGAAAGATATTTCTGTCCGAACACAAGGTGCAGCATTACCTGGTTTCTCAGCTGGAGCCCATGCGGCGAATGTAGTAGGGCCATCACTGAATTCCTGTCAAGGTATCCCCACGTCACTCTGTTTATTTACATCGCAAGGCTGTACCACCACGCTGACCCCCGCAATCGACAAGGCCTGCGGGAT…
DDX6-APOBEC1-MYC-T2A-EGFP	ATGAGCACGGCCAGAACAGAGAACCCTGTTATAATGGGTCTGTCCAGTCAAAATGGTCAGCTGAGAGGCCCTGTGAAACCCACTGGTGGCCCTGGAGGAGGGGGCACACAGACACAGCAACAGATGAACCAGCTGAAAAACACCAACACAATCAATAATGGCACTCAGCAGCAAGCACAGAGTATGACCACCACTATTAAACCTGGTGATGACTGGAAAAAGACTTTAAAACTCCCTCCAAAGGATCTAAGAATCAAAACTTCGGATGTGACCTCCACAAAAGGAAATGAGTTTGAAGATTACTGTTTGAAACGGGAGTTACTGATGGGAATTTTTGAAATGGGCTGGGAAAAGCCATCTCCTATTCAGGAGGAGAGCATTCCCATTGCTTTATCTGGT…
LSM14A-APOBEC1-MYC-T2A-EGFP	ATGAGCGGGGGCACCCCTTACATCGGCAGCAAGATCAGCCTCATCTCCAAGGCGGAGATCCGCTACGAGGGCATCCTCTACACCATCGACACCGAAAACTCCACCGTAGCCCTTGCCAAAGTTCGATCCTTTGGTACAGAAGACAGACCGACAGATCGTCCAATACCACCTCGAGATGAAGTCTTTGAATACATTATATTCCGTGGGAGTGACATTAAAGACCTTACTGTTTGTGAGCCACCAAAACCACAGTGTTCTTTGCCTCAAGACCCAGCTATTGTTCAGTCCTCACTAGGCTCATCGACTTCTTCATTCCAGTCCATGGGTTCTTATGGACCTTTCGGCAGGATGCCCACATACAGTCAGTTCAGTCCGAGTTCCTTAGTTGGGCAGCAGTTT…
4E-T-APOBEC1-MYC-T2A-EGFP	ATGGATAGGAGAAGTATGGGTGAAACAGAAAGTGGAGATGCTTTCCTTGACCTGAAGAAGCCTCCTGCCTCCAAATGCCCCCATCGCTATACAAAAGAAGAACTCTTGGATATAAAAGAACTCCCCCATTCCAAACAGAGGCCTTCATGCCTTTCTGAAAAATATGACAGTGATGGTGTCTGGGACCCTGAGAAGTGGCATGCCTCTCTCTACCCAGCTTCAGGGCGGAGCTCACCAGTGGAAAGTCTGAAGAAAGAGTTGGATACAGACCGGCCTTCCCTGGTGCGCAGGATAGTAGATCCACGAGAGCGTGTGAAAGAAGATGACTTAGATGTTGTTCTCAGCCCTCAGAGACGGAGCTTTGGAGGGGGCTGCCACGTGACAGCCGCTGTTAGCTCC…
PATL1-APOBEC1-MYC-T2A-EGFP	ATGTTCCGCTACGAGTCTTTGGAGGATTGTCCTCTGGATGAAGATGAAGATGCATTTCAGGGACTGGGAGAAGAAGATGAAGAGATTGATCAATTCAATGATGATACATTTGGGTCAGGTGCAGTTGATGATGATTGGCAGGAAGCACATGAGCGCCTGGCTGAATTGGAAGAAAAGCTACCAGTGGCAGTTAATGAACAAACAGGCAATGGAGAGAGAGATGAAATGGACTTGTTGGGTGACCATGAGGAGAATCTGGCAGAAAGGCTCAGTAAGATGGTGATTGAAAATGAACTAGAAGATCCAGCTATTATGAGGGCAGTGCAGACCAGGCCAGTTTTACAACCCCAACCAGGAAGTCTGAATTCCAGTATCTGGGATGGATCTGAAGTTCTGAGG…
EDC4-APOBEC1-MYC-T2A-EGFP	ATGGCCTCCTGCGCGAGCATCGACATCGAGGACGCCACGCAGCACCTGCGGGACATCCTCAAGCTGGACCGGCCCGCGGGCGGCCCCAGTGCAGAGAGCCCACGGCCATCCAGTGCCTACAATGGGGACCTCAATGGACTTCTGGTCCCAGACCCGCTCTGCTCAGGTGATAGTACCTCAGCAAACAAGACTGGTCTTCGGACCATGCCACCCATTAACCTGCAAGAGAAGCAGGTCATCTGTCTCTCAGGAGATGATAGCTCCACCTGCATTGGGATTTTGGCCAAGGAGGTGGAGATTGTGGCTAGCAGTGACTCTAGCATTTCAAGCAAGGCCCGGGGAAGCAACAAGGTGAAAATTCAGCCTGTCGCCAAGTATGACTGGGAACAGAAGTACTAC…
EDC3-APOBEC1-MYC-T2A-EGFP	ATGGCTACAGATTGGCTGGGAAGTATTGTGTCCATCAATTGTGGAGATAGCTTGGGTGTCTATCAGGGAAGAGTGTCAGCTGTGGATCAGGTCAGCCAGACCATTTCTCTCACCCGGCCTTTCCATAATGGAGTGAAGTGTCTTGTTCCAGAAGTCACCTTCAGGGCAGGTGACATTACGGAGTTAAAAATTCTGGAGATACCAGGACCTGGAGACAACCAACATTTTGGAGACCTTCATCAAACAGAATTAGGCCCCTCTGGTGCTGGCTGCCAAGTGGGCATCAATCAGAATGGCACAGGCAAGTTTGTCAAGAAGCCAGCCTCTTCCAGCAGTGCCCCTCAGAATATCCCTAAGAGGACAGATGTGAAGAGCCAGGATGTTGCCGTTTCCCCGCAG…
DCP2-APOBEC1-MYC-T2A-EGFP	ATGGAGACCAAACGGGTGGAGATTCCCGGCAGCGTCCTGGACGATCTCTGCAGCCGATTTATTTTGCATATTCCCAGCGAGGAAAGAGACAATGCAATCCGAGTGTGTTTTCAGATTGAACTTGCCCATTGGTTTTACTTGGATTTCTACATGCAGAACACACCAGGATTACCTCAGTGTGGGATAAGAGACTTTGCTAAAGCTGTCTTCAGTCATTGTCCGTTTTTGCTGCCTCAAGGTGAAGATGTGGAAAAAGTTTTGGATGAATGGAAGGAATATAAAATGGGAGTACCAACATATGGTGCAATTATTCTTGATGAGACACTTGAAAATGTACTACTAGTTCAGGGGTACCTAGCAAAATCAGGCTGGGGATTTCCAAAAGGAAAAGTAAATAAA…
CNOT1-R-APOBEC1-MYC-T2A-EGFP	ATGGCCCCTCACACCCAGAGTATGCAGGGTTTTCCTCCAAATTTGGGTTCTGCATTCAGTACCCCTCAGTCACCAGCAAAAGCATTTCCACCCCTTTCAACCCCCAATCAGACCACTGCATTCAGTGGTATTGGAGGACTTTCATCACAGCTTCCAGTAGGTGGTCTTGGCACAGGCAGCCTGACTGGTATAGGAACTGGTGCTCTTGGACTCCCTGCAGTGAATAACGACCCTTTTGTACAGAGGAAACTGGGCACCTCTGGACTGAATCAGCCTACATTCCAGCAGAGTAAGATGAAACCTTCGGACTTGTCTCAGGTGTGGCCAGAGGCAAACCAGCACTTTAGTAAAGAGATAGATGATGAAGCAAACAGCTATTTCCAGCGAATATATAATCAT…
CNOT10-APOBEC1-MYC-T2A-EGFP	ATGGCTGCAGACAAGCCTGCAGATCAGGGAGCAGAGAAACATGAAGGCACAGGTCAGTCCTCTGGGATCACTGATCAAGAGAAGGAGTTATCCACCAATGCTTTCCAAGCTTTCACATCTGGAAATTATGATGCCTGTCTACAACACCTTGCCTGTCTACAAGATATAAACAAAGATGATTATAAAATAATTTTGAATACAGCAGTAGCTGAGTTTTTTAAAAGTAACCAAACAACAACAGATAATTTGAGACAAACACTTAACCAGCTGAAGAATCAGGTCCACTCAGCTGTTGAAGAAATGGATGGATTAGATGATGTTGAAAACAGCATGTTGTACTATAATCAAGCAGTCATTCTTTATCATCTGCGGCAGTATACAGAAGCCATATCAGTTGGT…
ADAR2dd-HA-T2A-mCherry	ATGCAGCTGCATTTACCGCAGGTTTTAGCTGACGCTGTCTCACGCCTGGTCCTGGGTAAGTTTGGTGACCTGACCGACAACTTCTCCTCCCCTCACGCTCGCAGAAAAGTGCTGGCTGGAGTCGTCATGACAACAGGCACAGATGTTAAAGATGCCAAGGTGATAAGTGTTTCTACAGGAACAAAATGTATTAATGGTGAATACATGAGTGATCGTGGCCTTGCATTAAATGACTGCCATGCAGAAATAATATCTCGGAGATCCTTGCTCAGATTTCTTTATACACAACTTGAGCTTTACTTAAATAACAAAGATGATCAAAAAAGATCCATCTTTCAGAAATCAGAGCGAGGGGGGTTTAGGCTGAAGGAGAATGTCCAGTTTCATCTGTACATCAGC…
ADAR2dd-DDX6-HA-T2A-mCherry	ATGCAGCTGCATTTACCGCAGGTTTTAGCTGACGCTGTCTCACGCCTGGTCCTGGGTAAGTTTGGTGACCTGACCGACAACTTCTCCTCCCCTCACGCTCGCAGAAAAGTGCTGGCTGGAGTCGTCATGACAACAGGCACAGATGTTAAAGATGCCAAGGTGATAAGTGTTTCTACAGGAACAAAATGTATTAATGGTGAATACATGAGTGATCGTGGCCTTGCATTAAATGACTGCCATGCAGAAATAATATCTCGGAGATCCTTGCTCAGATTTCTTTATACACAACTTGAGCTTTACTTAAATAACAAAGATGATCAAAAAAGATCCATCTTTCAGAAATCAGAGCGAGGGGGGTTTAGGCTGAAGGAGAATGTCCAGTTTCATCTGTACATCAGC…
ADAR2dd-LSM14A-HA-T2A-mCherry	ATGCAGCTGCATTTACCGCAGGTTTTAGCTGACGCTGTCTCACGCCTGGTCCTGGGTAAGTTTGGTGACCTGACCGACAACTTCTCCTCCCCTCACGCTCGCAGAAAAGTGCTGGCTGGAGTCGTCATGACAACAGGCACAGATGTTAAAGATGCCAAGGTGATAAGTGTTTCTACAGGAACAAAATGTATTAATGGTGAATACATGAGTGATCGTGGCCTTGCATTAAATGACTGCCATGCAGAAATAATATCTCGGAGATCCTTGCTCAGATTTCTTTATACACAACTTGAGCTTTACTTAAATAACAAAGATGATCAAAAAAGATCCATCTTTCAGAAATCAGAGCGAGGGGGGTTTAGGCTGAAGGAGAATGTCCAGTTTCATCTGTACATCAGC…
ADAR2dd-4E-T-HA-T2A-mCherry	ATGCAGCTGCATTTACCGCAGGTTTTAGCTGACGCTGTCTCACGCCTGGTCCTGGGTAAGTTTGGTGACCTGACCGACAACTTCTCCTCCCCTCACGCTCGCAGAAAAGTGCTGGCTGGAGTCGTCATGACAACAGGCACAGATGTTAAAGATGCCAAGGTGATAAGTGTTTCTACAGGAACAAAATGTATTAATGGTGAATACATGAGTGATCGTGGCCTTGCATTAAATGACTGCCATGCAGAAATAATATCTCGGAGATCCTTGCTCAGATTTCTTTATACACAACTTGAGCTTTACTTAAATAACAAAGATGATCAAAAAAGATCCATCTTTCAGAAATCAGAGCGAGGGGGGTTTAGGCTGAAGGAGAATGTCCAGTTTCATCTGTACATCAGC…
ADAR2dd-PATL1-HA-T2A-mCherry	ATGCAGCTGCATTTACCGCAGGTTTTAGCTGACGCTGTCTCACGCCTGGTCCTGGGTAAGTTTGGTGACCTGACCGACAACTTCTCCTCCCCTCACGCTCGCAGAAAAGTGCTGGCTGGAGTCGTCATGACAACAGGCACAGATGTTAAAGATGCCAAGGTGATAAGTGTTTCTACAGGAACAAAATGTATTAATGGTGAATACATGAGTGATCGTGGCCTTGCATTAAATGACTGCCATGCAGAAATAATATCTCGGAGATCCTTGCTCAGATTTCTTTATACACAACTTGAGCTTTACTTAAATAACAAAGATGATCAAAAAAGATCCATCTTTCAGAAATCAGAGCGAGGGGGGTTTAGGCTGAAGGAGAATGTCCAGTTTCATCTGTACATCAGC…
ADAR2dd-EDC3-HA-T2A-mCherry	ATGCAGCTGCATTTACCGCAGGTTTTAGCTGACGCTGTCTCACGCCTGGTCCTGGGTAAGTTTGGTGACCTGACCGACAACTTCTCCTCCCCTCACGCTCGCAGAAAAGTGCTGGCTGGAGTCGTCATGACAACAGGCACAGATGTTAAAGATGCCAAGGTGATAAGTGTTTCTACAGGAACAAAATGTATTAATGGTGAATACATGAGTGATCGTGGCCTTGCATTAAATGACTGCCATGCAGAAATAATATCTCGGAGATCCTTGCTCAGATTTCTTTATACACAACTTGAGCTTTACTTAAATAACAAAGATGATCAAAAAAGATCCATCTTTCAGAAATCAGAGCGAGGGGGGTTTAGGCTGAAGGAGAATGTCCAGTTTCATCTGTACATCAGC…
ADAR2dd-CNOT1-R-HA-T2A-mCherry	ATGCAGCTGCATTTACCGCAGGTTTTAGCTGACGCTGTCTCACGCCTGGTCCTGGGTAAGTTTGGTGACCTGACCGACAACTTCTCCTCCCCTCACGCTCGCAGAAAAGTGCTGGCTGGAGTCGTCATGACAACAGGCACAGATGTTAAAGATGCCAAGGTGATAAGTGTTTCTACAGGAACAAAATGTATTAATGGTGAATACATGAGTGATCGTGGCCTTGCATTAAATGACTGCCATGCAGAAATAATATCTCGGAGATCCTTGCTCAGATTTCTTTATACACAACTTGAGCTTTACTTAAATAACAAAGATGATCAAAAAAGATCCATCTTTCAGAAATCAGAGCGAGGGGGGTTTAGGCTGAAGGAGAATGTCCAGTTTCATCTGTACATCAGC…
ADAR2dd-CNOT10-HA-T2A-mCherry	ATGCAGCTGCATTTACCGCAGGTTTTAGCTGACGCTGTCTCACGCCTGGTCCTGGGTAAGTTTGGTGACCTGACCGACAACTTCTCCTCCCCTCACGCTCGCAGAAAAGTGCTGGCTGGAGTCGTCATGACAACAGGCACAGATGTTAAAGATGCCAAGGTGATAAGTGTTTCTACAGGAACAAAATGTATTAATGGTGAATACATGAGTGATCGTGGCCTTGCATTAAATGACTGCCATGCAGAAATAATATCTCGGAGATCCTTGCTCAGATTTCTTTATACACAACTTGAGCTTTACTTAAATAACAAAGATGATCAAAAAAGATCCATCTTTCAGAAATCAGAGCGAGGGGGGTTTAGGCTGAAGGAGAATGTCCAGTTTCATCTGTACATCAGC…
DDX6-ADAR2dd-HA-T2A-mCherry	ATGAGCACGGCCAGAACAGAGAACCCTGTTATAATGGGTCTGTCCAGTCAAAATGGTCAGCTGAGAGGCCCTGTGAAACCCACTGGTGGCCCTGGAGGAGGGGGCACACAGACACAGCAACAGATGAACCAGCTGAAAAACACCAACACAATCAATAATGGCACTCAGCAGCAAGCACAGAGTATGACCACCACTATTAAACCTGGTGATGACTGGAAAAAGACTTTAAAACTCCCTCCAAAGGATCTAAGAATCAAAACTTCGGATGTGACCTCCACAAAAGGAAATGAGTTTGAAGATTACTGTTTGAAACGGGAGTTACTGATGGGAATTTTTGAAATGGGCTGGGAAAAGCCATCTCCTATTCAGGAGGAGAGCATTCCCATTGCTTTATCTGGT…
LSM14A-ADAR2dd-HA-T2A-mCherry	ATGAGCGGGGGCACCCCTTACATCGGCAGCAAGATCAGCCTCATCTCCAAGGCGGAGATCCGCTACGAGGGCATCCTCTACACCATCGACACCGAAAACTCCACCGTAGCCCTTGCCAAAGTTCGATCCTTTGGTACAGAAGACAGACCGACAGATCGTCCAATACCACCTCGAGATGAAGTCTTTGAATACATTATATTCCGTGGGAGTGACATTAAAGACCTTACTGTTTGTGAGCCACCAAAACCACAGTGTTCTTTGCCTCAAGACCCAGCTATTGTTCAGTCCTCACTAGGCTCATCGACTTCTTCATTCCAGTCCATGGGTTCTTATGGACCTTTCGGCAGGATGCCCACATACAGTCAGTTCAGTCCGAGTTCCTTAGTTGGGCAGCAGTTT…
4E-T-ADAR2dd-HA-T2A-mCherry	ATGGATAGGAGAAGTATGGGTGAAACAGAAAGTGGAGATGCTTTCCTTGACCTGAAGAAGCCTCCTGCCTCCAAATGCCCCCATCGCTATACAAAAGAAGAACTCTTGGATATAAAAGAACTCCCCCATTCCAAACAGAGGCCTTCATGCCTTTCTGAAAAATATGACAGTGATGGTGTCTGGGACCCTGAGAAGTGGCATGCCTCTCTCTACCCAGCTTCAGGGCGGAGCTCACCAGTGGAAAGTCTGAAGAAAGAGTTGGATACAGACCGGCCTTCCCTGGTGCGCAGGATAGTAGATCCACGAGAGCGTGTGAAAGAAGATGACTTAGATGTTGTTCTCAGCCCTCAGAGACGGAGCTTTGGAGGGGGCTGCCACGTGACAGCCGCTGTTAGCTCC…
PATL1-ADAR2dd-HA-T2A-mCherry	ATGTTCCGCTACGAGTCTTTGGAGGATTGTCCTCTGGATGAAGATGAAGATGCATTTCAGGGACTGGGAGAAGAAGATGAAGAGATTGATCAATTCAATGATGATACATTTGGGTCAGGTGCAGTTGATGATGATTGGCAGGAAGCACATGAGCGCCTGGCTGAATTGGAAGAAAAGCTACCAGTGGCAGTTAATGAACAAACAGGCAATGGAGAGAGAGATGAAATGGACTTGTTGGGTGACCATGAGGAGAATCTGGCAGAAAGGCTCAGTAAGATGGTGATTGAAAATGAACTAGAAGATCCAGCTATTATGAGGGCAGTGCAGACCAGGCCAGTTTTACAACCCCAACCAGGAAGTCTGAATTCCAGTATCTGGGATGGATCTGAAGTTCTGAGG…
EDC3-ADAR2dd-HA-T2A-mCherry	ATGGCTACAGATTGGCTGGGAAGTATTGTGTCCATCAATTGTGGAGATAGCTTGGGTGTCTATCAGGGAAGAGTGTCAGCTGTGGATCAGGTCAGCCAGACCATTTCTCTCACCCGGCCTTTCCATAATGGAGTGAAGTGTCTTGTTCCAGAAGTCACCTTCAGGGCAGGTGACATTACGGAGTTAAAAATTCTGGAGATACCAGGACCTGGAGACAACCAACATTTTGGAGACCTTCATCAAACAGAATTAGGCCCCTCTGGTGCTGGCTGCCAAGTGGGCATCAATCAGAATGGCACAGGCAAGTTTGTCAAGAAGCCAGCCTCTTCCAGCAGTGCCCCTCAGAATATCCCTAAGAGGACAGATGTGAAGAGCCAGGATGTTGCCGTTTCCCCGCAG…
CNOT1-R-ADAR2dd-HA-T2A-mCherry	ATGGCCCCTCACACCCAGAGTATGCAGGGTTTTCCTCCAAATTTGGGTTCTGCATTCAGTACCCCTCAGTCACCAGCAAAAGCATTTCCACCCCTTTCAACCCCCAATCAGACCACTGCATTCAGTGGTATTGGAGGACTTTCATCACAGCTTCCAGTAGGTGGTCTTGGCACAGGCAGCCTGACTGGTATAGGAACTGGTGCTCTTGGACTCCCTGCAGTGAATAACGACCCTTTTGTACAGAGGAAACTGGGCACCTCTGGACTGAATCAGCCTACATTCCAGCAGAGTAAGATGAAACCTTCGGACTTGTCTCAGGTGTGGCCAGAGGCAAACCAGCACTTTAGTAAAGAGATAGATGATGAAGCAAACAGCTATTTCCAGCGAATATATAATCAT…
CNOT10-ADAR2dd-HA-T2A-mCherry	ATGGCTGCAGACAAGCCTGCAGATCAGGGAGCAGAGAAACATGAAGGCACAGGTCAGTCCTCTGGGATCACTGATCAAGAGAAGGAGTTATCCACCAATGCTTTCCAAGCTTTCACATCTGGAAATTATGATGCCTGTCTACAACACCTTGCCTGTCTACAAGATATAAACAAAGATGATTATAAAATAATTTTGAATACAGCAGTAGCTGAGTTTTTTAAAAGTAACCAAACAACAACAGATAATTTGAGACAAACACTTAACCAGCTGAAGAATCAGGTCCACTCAGCTGTTGAAGAAATGGATGGATTAGATGATGTTGAAAACAGCATGTTGTACTATAATCAAGCAGTCATTCTTTATCATCTGCGGCAGTATACAGAAGCCATATCAGTTGGT…
FKBP-ADAR2dd-EGFP-MYC	ATGGGTGTGCAGGTAGAAACAATCTCCCCGGGAGATGGCCGCACGTTCCCCAAGAGGGGACAGACCTGTGTGGTGCACTACACCGGTATGCTCGAAGACGGCAAGAAGTTCGATAGCTCCCGAGACCGAAACAAGCCCTTCAAGTTCATGCTGGGCAAGCAAGAGGTCATACGCGGTTGGGAAGAAGGCGTGGCCCAGATGAGCGTAGGGCAGCGCGCCAAGCTGACCATTAGCCCCGACTACGCCTACGGGGCCACCGGGCACCCCGGCATCATTCCACCCCATGCGACACTCGTCTTTGATGTGGAGCTGCTCAAGCTGGAAGGTGGCGGTGGATCCGGTGGCGGTGGATCCCAGCTGCATTTACCGCAGGTTTTAGCTGACGCTGTCTCACGCCTG…
LSM14A-FRB-HA	ATGAGCGGGGGCACCCCTTACATCGGCAGCAAGATCAGCCTCATCTCCAAGGCGGAGATCCGCTACGAGGGCATCCTCTACACCATCGACACCGAAAACTCCACCGTAGCCCTTGCCAAAGTTCGATCCTTTGGTACAGAAGACAGACCGACAGATCGTCCAATACCACCTCGAGATGAAGTCTTTGAATACATTATATTCCGTGGGAGTGACATTAAAGACCTTACTGTTTGTGAGCCACCAAAACCACAGTGTTCTTTGCCTCAAGACCCAGCTATTGTTCAGTCCTCACTAGGCTCATCGACTTCTTCATTCCAGTCCATGGGTTCTTATGGACCTTTCGGCAGGATGCCCACATACAGTCAGTTCAGTCCGAGTTCCTTAGTTGGGCAGCAGTTT…
FKBP-APOBEC1-EGFP-MYC	ATGGGTGTGCAGGTAGAAACAATCTCCCCGGGAGATGGCCGCACGTTCCCCAAGAGGGGACAGACCTGTGTGGTGCACTACACCGGTATGCTCGAAGACGGCAAGAAGTTCGATAGCTCCCGAGACCGAAACAAGCCCTTCAAGTTCATGCTGGGCAAGCAAGAGGTCATACGCGGTTGGGAAGAAGGCGTGGCCCAGATGAGCGTAGGGCAGCGCGCCAAGCTGACCATTAGCCCCGACTACGCCTACGGGGCCACCGGGCACCCCGGCATCATTCCACCCCATGCGACACTCGTCTTTGATGTGGAGCTGCTCAAGCTGGAAGGTGGCGGTGGATCCGGTGGCGGTGGATCCGGTGGCGGTGGATCCAGCTCAGAGACTGGCCCAGTGGCTGTGGAC…
DDX6-FRB-HA	ATGAGCACGGCCAGAACAGAGAACCCTGTTATAATGGGTCTGTCCAGTCAAAATGGTCAGCTGAGAGGCCCTGTGAAACCCACTGGTGGCCCTGGAGGAGGGGGCACACAGACACAGCAACAGATGAACCAGCTGAAAAACACCAACACAATCAATAATGGCACTCAGCAGCAAGCACAGAGTATGACCACCACTATTAAACCTGGTGATGACTGGAAAAAGACTTTAAAACTCCCTCCAAAGGATCTAAGAATCAAAACTTCGGATGTGACCTCCACAAAAGGAAATGAGTTTGAAGATTACTGTTTGAAACGGGAGTTACTGATGGGAATTTTTGAAATGGGCTGGGAAAAGCCATCTCCTATTCAGGAGGAGAGCATTCCCATTGCTTTATCTGGT…
