# Supplementary material for: Systematic characterization of the composition and dynamics of processing body-associated mRNAs
Source: Research Square preprint supplement (doi:10.21203/rs.3.rs-5354706/v1), 2024-12-04
Supplement: Supplementary file 4 [file Supplementary Table 2.xlsx]

## Sheet: Sheet 1
Supplementary Table 2: Oligos used in this paper
Oligo name	DNA sequence (5' > 3')
TRE-APOBEC1-F	TTTTGTCTTATACTTGGATCCGCCACCATGAGCTCAGAGACTGGC
MYC-APOBEC1-R	ATTCAGATCCTCTTCTGAGATGAGTTTTTGTTCTTTCAACCCGGTGGCCCA
2xlinker-APOBEC1-R	GGATCCACCGCCACCGGATCCACCGCCACCTTTCAACCCGGTGGCCCA
2xlinker-DDX6-F	GGTGGCGGTGGATCCGGTGGCGGTGGATCCAGCACGGCCAGAACAGA
MYC-DDX6-R	CAGATCCTCTTCTGAGATGAGTTTTTGTTCAGGTTTCTCATCTTCTACAGG
2xlinker-4ET-F	CGGTGGCGGTGGATCCGGTGGCGGTGGATCCATGGATAGGAGAAGTATGGGT
MYC-4ET-R	GATCCTCTTCTGAGATGAGTTTTTGTTCCTGTCGGTATTCCAATTCATC
2xlinker-CNOT1R-F	GGTGGCGGTGGATCCGGTGGCGGTGGATCCGCCCCTCACACCCAGAGTAT
MYC-CNOT1R-R	GATCCTCTTCTGAGATGAGTTTTTGTTCTTGCTTCATGGGCTGGGCTA
2xlinker-CNOT10-F	GGTGGCGGTGGATCCGGTGGCGGTGGATCCGCTGCAGACAAGCCTGCA
MYC-CNOT10-R	GATCCTCTTCTGAGATGAGTTTTTGTTCCTTTCTCTGCACAGTGGTG
2xlinker-DCP2-F	GGTGGCGGTGGATCCGGTGGCGGTGGATCCGAGACCAAACGGGTGGAGA
MYC-DCP2-R	CAGATCCTCTTCTGAGATGAGTTTTTGTTCAAGGTCCAAGATTTTCATTATAGCA
2xlinker-EDC3-F	GGTGGCGGTGGATCCGGTGGCGGTGGATCCGCTACAGATTGGCTGG
MYC-EDC3-R	CAGATCCTCTTCTGAGATGAGTTTTTGTTCAGCAGAGTGCAGTGGGATAA
2xlinker-EDC4-F	GGTGGCGGTGGATCCGGTGGCGGTGGATCCGCCTCCTGCGCGAG
MYC-EDC4-R	CAGATCCTCTTCTGAGATGAGTTTTTGTTCAGGGAGGCTGGGGGTCAC
2xlinker-LSM14A-F	GGTGGCGGTGGATCCGGTGGCGGTGGATCCAGCGGGGGCACCCCTTAC
MYC-LSM14A-R	CAGATCCTCTTCTGAGATGAGTTTTTGTTCTGCAGCAACTTTGTTGTCTTTCCT
2xlinker-PATL1-F	CGGTGGCGGTGGATCCGGTGGCGGTGGATCCATGTTCCGCTACGAGTCTT
MYC-PATL1-R	GATCCTCTTCTGAGATGAGTTTTTGTTCTCGTATCCCCTGAACTAGCT
TRE-4ET-F	TTTTGTCTTATACTTGGATCCGCCACCATGGATAGGAGAAGTATGGGT
2xlinker-4ET-R	GGATCCACCGCCACCGGATCCACCGCCACCCTGTCGGTATTCCAATTCATC
TRE-CNOT1R-F	TTTTGTCTTATACTTGGATCCGCCACCATGGCCCCTCACACCCAGAGTAT
2xlinker-CNOT1R-R	GGATCCACCGCCACCGGATCCACCGCCACCTTGCTTCATGGGCTGGGCTA
TRE-CNOT10-F	TTTTGTCTTATACTTGGATCCGCCACCATGGCTGCAGACAAGCCTGCA
2xlinker-CNOT10-R	GGATCCACCGCCACCGGATCCACCGCCACCCTTTCTCTGCACAGTGGTG
TRE-DCP2-F	TTTTGTCTTATACTTGGATCCGCCACCATGGAGACCAAACGGGTGGAGA
2xlinker-DCP2-R	GGATCCACCGCCACCGGATCCACCGCCACCAAGGTCCAAGATTTTCATTATAGC
TRE-DDX6-F	TTTTGTCTTATACTTGGATCCGCCACCATGAGCACGGCC
2xlinker-DDX6-R	GGATCCACCGCCACCGGATCCACCGCCACCAGGTTTCTCATCTTCTACAGGC
TRE-EDC3-F	TTTTGTCTTATACTTGGATCCGCCACCATGGCTACAGATTGGCTGGGAA
2xlinker-EDC3-R	GGATCCACCGCCACCGGATCCACCGCCACCAGCAGAGTGCAGTGGGATA
TRE-EDC4-F	TTTTGTCTTATACTTGGATCCGCCACCATGGCCTCCTGCGCGAGCATC
2xlinker-EDC4-R	GGATCCACCGCCACCGGATCCACCGCCACCAGGGAGGCTGGGGGTCAC
TRE-LSM14A-F	TTTTGTCTTATACTTGGATCCGCCACCATGAGCGGGGGCACCCCTTAC
2xlinker-LSM14A-R	GGATCCACCGCCACCGGATCCACCGCCACCTGCAGCAACTTTGTTGTCT
TRE-PATL1-F	TTTTGTCTTATACTTGGATCCGCCACCATGTTCCGCTACGAGTCTT
2xlinker-PATL1-R	GGATCCACCGCCACCGGATCCACCGCCACCTCGTATCCCCTGAACTAGCT
2xlinker-APOBEC1-F	GGTGGCGGTGGATCCGGTGGCGGTGGATCCAGCTCAGAGACTGGCCCAG
T2A-MYC-R	CACCGCATGTTAGCAGACTTCCTCTGCCCTCACCGGTATGCATATTCAGATCCTCTTCTGAGAT
GFP-T2A-R	ATGGTTGTGGCCATGTTAATTAAAGGGCCGGGATTCTCCTCCACGTCACCGCATGTTAGCAGAC
TRE-ADAR2dd-F	TTTTGTCTTATACTTGGATCCGCCACCATGCAGCTGCATTTACCGC
HA-ADAR2dd-R	TAATCCGGAACATCATACGGATACGTGAGTGAGAACTGGTCC
2xlinker-ADAR2dd-R	GGATCCACCGCCACCGGATCCACCGCCACCCGTGAGTGAGAACTGGTCC
HA-EDC3-R	CCGGAACATCATACGGATAAGCAGAGTGCAGTGGGATA
HA-4ET-R	CTGCATAATCCGGAACATCATACGGATACTGTCGGTATTCCAATTCA
HA-DDX6-R	CATAATCCGGAACATCATACGGATAAGGTTTCTCATCTTCTACAGGC
HA-PATL1-R	GCATAATCCGGAACATCATACGGATATCGTATCCCCTGAACTAGCT
HA-LSM14A-R	CTGCATAATCCGGAACATCATACGGATATGCAGCAACTTTGTTGTCT
HA-CNOT1R-R	GCATAATCCGGAACATCATACGGATATTGCTTCATGGGCTGGGCTA
HA-CNOT10-R	GCATAATCCGGAACATCATACGGATACTTTCTCTGCACAGTGGTG
2xlinker-ADAR2dd-F	GGTGGCGGTGGATCCGGTGGCGGTGGATCCCAGCTGCATTTACCGC
T2A-HA-R	TCCTCTGCCCTCTCCGGATCCTGCATAATCCGGAACATCATACG
T2A-mCherry-F	GAGAATCCCGGCCCTTTAATTAACATGGTGAGCAAGGGCGAG
PmeI-mCherry-R	AGGCTTAGCTGGCCGGTTTAAACTTACTTGTACAGCTCGTCCAT
WPRE-SalI-Blast-F	ATCCAGAGGTTGATTGTCGACTTAGCCCTCCCACACATAAC
T2A-AscI-Blast-R	GAGAATCCCGGCCCTGGCGCGCCTATGGCCAAGCCTTTGTCTCA
EF1a-NotI-FKBP-F	TTCAGGTGTCGTGAAGCGGCCGCGCCACCATGGGTGTGCAGG
2xlinker-FKBP-R	GGATCCACCGCCACCGGATCCACCGCCACCTTCCAGCTTGAGCAGCTCC
2xlinker-APOBEC1-F	GGTGGCGGTGGATCCGGTGGCGGTGGATCCAGCTCAGAGACTGGCCCAG
2xlinker-APOBEC1-R	GGATCCACCGCCACCGGATCCACCGCCACCTTTCAACCCGGTGGCCCA
2xlinker-GFP-F	GGTGGCGGTGGATCCGGTGGCGGTGGATCCATGGCCACAACCATGGTGA
MYC-GFP-R	CAGATCCTCTTCTGAGATGAGTTTTTGTTCCTTGTACAGCTCGTCCATGC
WPRE-ClaI-MYC-R	GGTTGATTAGGATCTATCGATTTACAGATCCTCTTCTGAGATGAG
EF1a-NotI-LSM14A-F	TTCAGGTGTCGTGAAGCGGCCGCGCCACCATGAGCGGGGGCA
linker-LSM14A-R	CCCTGAGGAACCGGAAGACCCAGAGGTACCACCTCT
EF1A-NotI-DDX6-F	TTCAGGTGTCGTGAAGCGGCCGCGCCACCATGAGCACGGCC
linker2-DDX6-R	GGATCCACCGCCACCGGATCCACCGCCACCAGGTTTCTCATCTTCTACAGGC
linker-FRB-F	TCCGGTTCCTCAGGGTCGTCGGCCACCATGGCTTCTAGAATCCTCTGGCATGAGATGT
linker2-FRB-F	GGTGGCGGTGGATCCGGTGGCGGTGGATCCATCCTCTGGCATGAGATGT
IRES-MluI-HA-R	GGGGGGGAGGGATCCACGCGTTTATGCGTAGTCTGGTACGT
DDX3X-qFwd	ACTATGCCTCCAAAGGGTGTCC
DDX3X-qRev	AGAGCCAACTCTTCCTACAGCC
EIF3A-qFwd	CGTAATGCGACTCAAAGCTGCAC
EIF3A-qRev	ACGCTGCCTTTTCCGTTCTTCC
HSPA8-qFwd	TCCTACCAAGCAGACACAGACC
HSPA8-qRev	CAGGAGGTATGCCTGTGAGTTC
G3BP2-qFwd	GAGCTGAAACCACAAGTGGAGG
G3BP2-qRev	GGTCACTGAAGCCCAGGAGAAA
EIF4A2-qFwd	CTCTCCTTCGTGGCATCTATGC
EIF4A2-qRev	TGGCTGTCTTGCCAGTACCTGA
EIF4G2-qFwd	CTAAGCCAGCTCTACCATAACC
EIF4G2-qRev	CATCTGCATTAAGCTGTCCTTTC
CANX-qFwd	CCTAAAGCAGAGGAGGATGAAA
CANX-qRev	GAGGAGGGAGAAGAAATCACAG
DHX9-qFwd	CAGCTGCTGGTATCAACCTTA
DHX9-qRev	TATCCGCTTCCATTGTCGTATC
YWHAZ-qFwd	ACCGTTACTTGGCTGAGGTTGC
YWHAZ-qRev	CCCAGTCTGATAGGATGTGTTGG
DDX39B-qFwd	GATGTGCAGGATCGCTTTGAGG
DDX39B-qRev	TCTCCTGAAGGACAGACGGTCA
SUMO1-qFwd	AGCAGTGAGATTCACTTCAAAGTG
SUMO1-qRev	TCTGACCCTCAAAGAGAAACCTG
RPS25-qFwd	AGCTGTGGTCTCTGAGAGACTG
RPS25-qRev	GCTCTGTGCTTTGAAACCAGTTTG
TMED7-qFwd	CCCTCATTCTTCTGGTGGTTAG
TMED7-qRev	ACGAGTTGTGGTGGTTCTTT
hPLA2G4A-qFwd	GGATTCTCTGGTGTGATGAAGGC
hPLA2G4A-qRev	CCTTTCTCTGGAAAATCAGGGTG
DDX6-gRNA	TGAACGGCTAGACCTGAAGA
S5-ME-A1-hXBP1-F	TCGTCGGCAGCGTCAGATGTGTATAAGAGACAGCGATGTGAATGAAGTGAGGCCAGTGG
S5-ME-A2-hXBP1-F	TCGTCGGCAGCGTCAGATGTGTATAAGAGACAGTGACCAGAATGAAGTGAGGCCAGTGG
S5-ME-A3-hXBP1-F	TCGTCGGCAGCGTCAGATGTGTATAAGAGACAGACAGTGGAATGAAGTGAGGCCAGTGG
S5-ME-A4-hXBP1-F	TCGTCGGCAGCGTCAGATGTGTATAAGAGACAGGCCAATGAATGAAGTGAGGCCAGTGG
S5-ME-A5-hXBP1-F	TCGTCGGCAGCGTCAGATGTGTATAAGAGACAGCAGATCGAATGAAGTGAGGCCAGTGG
S5-ME-A6-hXBP1-F	TCGTCGGCAGCGTCAGATGTGTATAAGAGACAGCTTGTAGAATGAAGTGAGGCCAGTGG
S5-ME-A7-hXBP1-F	TCGTCGGCAGCGTCAGATGTGTATAAGAGACAGATCACGGAATGAAGTGAGGCCAGTGG
S5-ME-A8-hXBP1-F	TCGTCGGCAGCGTCAGATGTGTATAAGAGACAGTTAGGCGAATGAAGTGAGGCCAGTGG
S5-ME-A9-hXBP1-F	TCGTCGGCAGCGTCAGATGTGTATAAGAGACAGACTTGAGAATGAAGTGAGGCCAGTGG
S5-ME-A10-hXBP1-F	TCGTCGGCAGCGTCAGATGTGTATAAGAGACAGGATCAGGAATGAAGTGAGGCCAGTGG
S7-ME-hXBP1-R	GTCTCGTGGGCTCGGAGATGTGTATAAGAGACAGAAGACATTTGTCTAATGACCCT
P5-i5-S5-1	AATGATACGGCGACCACCGAGATCTACACATTCTAAGTCGTCGGCAGCGTC
P5-i5-S5-2	AATGATACGGCGACCACCGAGATCTACACCCCGATTATCGTCGGCAGCGTC
P7-i7-S7-1	CAAGCAGAAGACGGCATACGAGATCCAAGATGGTCTCGTGGGCTCGG
