# Supplementary material for: Systematic characterization of the composition and dynamics of processing body-associated mRNAs
Source: Research Square preprint supplement (doi:10.21203/rs.3.rs-5354706/v1), 2024-12-04
Supplement: Supplementary file 7 [file Supplementary Table 3.xlsx]

## Sheet: Sheet1
Supplementary Table 3: Overview of all bulk sequencing datasets
Sample name	Number of fragments uniquely mapping to hg38	Corresponding Figure
HCT116_induced_4E-T-ADAR2dd-1	21048184	Figure 1 & Figure S1
HCT116_induced_4E-T-ADAR2dd-2	21701866	Figure 1 & Figure S1
HCT116_induced_4E-T-APOBEC1-1	19826595	Figure 1 & Figure S1
HCT116_induced_4E-T-APOBEC1-2	21528899	Figure 1 & Figure S1
HCT116_induced_ADAR2dd-4E-T-1	16417437	Figure 1 & Figure S1
HCT116_induced_ADAR2dd-4E-T-2	16190213	Figure 1 & Figure S1
HCT116_induced_APOBEC1-4E-T-1	24239903	Figure 1 & Figure S1
HCT116_induced_APOBEC1-4E-T-2	22662901	Figure 1 & Figure S1
HCT116_induced_CNOT1-R-APOBEC1-1	19532380	Figure 1 & Figure S1
HCT116_induced_CNOT10-APOBEC1-1	25872487	Figure 1 & Figure S1
HCT116_induced_APOBEC1-CNOT10-1	27527648	Figure 1 & Figure S1
HCT116_induced_ADAR2dd-control-1	24366178	Figure 1 & Figure S1
HCT116_induced_ADAR2dd-control-2	22413528	Figure 1 & Figure S1
HCT116_induced_APOBEC1-control-1	19888846	Figure 1 & Figure S1
HCT116_induced_APOBEC1-control-2	19470349	Figure 1 & Figure S1
HCT116_induced_APOBEC1-control-3	18780439	Figure 1 & Figure S1
HCT116_induced_APOBEC-DCP2-1	14475468	Figure 1 & Figure S1
HCT116_induced_DCP2-APOBEC1-1	20260267	Figure 1 & Figure S1
HCT116_induced_DCP2-APOBEC1-2	25959907	Figure 1 & Figure S1
HCT116_induced_DDX6-ADAR2dd-1	20924817	Figure 1 & Figure S1
HCT116_induced_DDX6-ADAR2dd-2	21172751	Figure 1 & Figure S1
HCT116_induced_DDX6-APOBEC1-1	23226591	Figure 1 & Figure S1
HCT116_induced_DDX6-APOBEC1-2	21786215	Figure 1 & Figure S1
HCT116_induced_ADAR2dd-DDX6-1	15756003	Figure 1 & Figure S1
HCT116_induced_ADAR2dd-DDX6-2	18613943	Figure 1 & Figure S1
HCT116_induced_APOBEC1-DDX6-1	22478485	Figure 1 & Figure S1
HCT116_induced_APOBEC1-DDX6-2	18704285	Figure 1 & Figure S1
HCT116_induced_APOBEC1-DDX6-3	17283220	Figure 1 & Figure S1
HCT116_induced_APOBEC-EDC3-1	16871272	Figure 1 & Figure S1
HCT116_induced_EDC3-ADAR2dd-1	26119570	Figure 1 & Figure S1
HCT116_induced_EDC3-ADAR2dd-2	23371492	Figure 1 & Figure S1
HCT116_induced_EDC3-APOBEC1-1	19868351	Figure 1 & Figure S1
HCT116_induced_EDC3-APOBEC1-2	19440566	Figure 1 & Figure S1
HCT116_induced_ADAR2dd-EDC3-1	22582732	Figure 1 & Figure S1
HCT116_induced_ADAR2dd-EDC3-2	22542076	Figure 1 & Figure S1
HCT116_induced_EDC4-APOBEC1-1	21265159	Figure 1 & Figure S1
HCT116_induced_EDC4-APOBEC1-2	19272794	Figure 1 & Figure S1
HCT116_induced_APOBEC1-EDC4-1	15949428	Figure 1 & Figure S1
HCT116_induced_ADAR2dd-LSM14A-1	18087849	Figure 1 & Figure S1
HCT116_induced_ADAR2dd-LSM14A-2	19236174	Figure 1 & Figure S1
HCT116_induced_LSM14A-ADAR2dd-1	12982926	Figure 1 & Figure S1
HCT116_induced_LSM14A-ADAR2dd-2	21461393	Figure 1 & Figure S1
HCT116_induced_LSM14A-APOBEC1-1	20378236	Figure 1 & Figure S1
HCT116_induced_LSM14A-APOBEC1-2	20894740	Figure 1 & Figure S1
HCT116_induced_APOBEC1-LSM14A-1	18323540	Figure 1 & Figure S1
HCT116_induced_ADAR2dd-PATL1-1	18745973	Figure 1 & Figure S1
HCT116_induced_ADAR2dd-PATL1-2	20828339	Figure 1 & Figure S1
HCT116_induced_PATL1-ADAR2dd-1	19633930	Figure 1 & Figure S1
HCT116_induced_PATL1-ADAR2dd-2	19315163	Figure 1 & Figure S1
HCT116_induced_PATL1-APOBEC1-1	12264198	Figure 1 & Figure S1
HCT116_induced_PATL1-APOBEC1-2	20077812	Figure 1 & Figure S1
HCT116_induced_APOBEC1-PATL1-1	21860010	Figure 1 & Figure S1
HCT116_induced_APOBEC1-PATL1-2	22547081	Figure 1 & Figure S1
HCT116_uninduced_APOBEC1-control-1	27416016	Figure 1 & Figure S1
HCT116_uninduced_APOBEC1-control-2	22669855	Figure 1 & Figure S1
HCT116_uninduced_APOBEC1-control-3	19695874	Figure 1 & Figure S1
HCT116_uninduced_APOBEC1-DDX6-1	20287114	Figure 1 & Figure S1
HCT116_uninduced_APOBEC1-DDX6-2	22871911	Figure 1 & Figure S1
HCT116_uninduced_APOBEC1-DDX6-3	20959228	Figure 1 & Figure S1
HCT116_uninduced_ADAR2dd-control-1	18773776	Figure 1 & Figure S1
HCT116_uninduced_ADAR2dd-control-2	16724857	Figure 1 & Figure S1
HCT116_induced_APOBEC1_ADAR2dd-control-1	22192011	Figure 2 & Figure S2
HCT116_induced_APOBEC1_ADAR2dd-control-2	26239866	Figure 2 & Figure S2
HCT116_uninduced_APOBEC1_ADAR2dd-control-1	26526209	Figure 2 & Figure S2
HCT116_uninduced_APOBEC1_ADAR2dd-control-2	23985842	Figure 2 & Figure S2
HCT116_induced_APOBEC1-DDX6_LSM14A-ADAR2dd-1	26459114	Figure 2 & Figure S2
HCT116_induced_APOBEC1-DDX6_LSM14A-ADAR2dd-2	26194509	Figure 2 & Figure S2
HEK293T_induced_APOBEC1_ADAR2dd-control-1	17826945	Figure 2 & Figure S2
HEK293T_induced_APOBEC1_ADAR2dd-control-2	17417582	Figure 2 & Figure S2
HEK293T_induced_APOBEC1-DDX6_LSM14A-ADAR2dd-1	20573386	Figure 2 & Figure S2 & Figure S4
HEK293T_induced_APOBEC1-DDX6_LSM14A-ADAR2dd-2	17698930	Figure 2 & Figure S2 & Figure S4
HCT116_DDX6-KO_polysome-1	20917000	Figure S3
HCT116_DDX6-KO_polysome-2	20393340	Figure S3
HCT116_DDX6-KO_total-1	20791606	Figure S3
HCT116_DDX6-KO_total-2	18277055	Figure S3
HCT116_WT_polysome-1	23542752	Figure S3
HCT116_WT_polysome-2	20236550	Figure S3
HCT116_WT_total-1	20816017	Figure S3
HCT116_WT_total-2	24951639	Figure S3
HEK293T_DDX6-KO_polysome-1	34476523	Figure S3
HEK293T_DDX6-KO_polysome-2	29492602	Figure S3
HEK293T_DDX6-KO_total-1	27660068	Figure S3
HEK293T_DDX6-KO_total-2	32376081	Figure S3
HEK293T_WT_polysome-1	28852627	Figure S3
HEK293T_WT_polysome-2	28366447	Figure S3
HEK293T_WT_total-1	27747300	Figure S3
HEK293T_WT_total-2	33082538	Figure S3
HEK293T_LSM14A-TRIBE-ID_Rapa0min-1	22172562	Figure 4 & Figure S5
HEK293T_LSM14A-TRIBE-ID_Rapa120min-1	17002929	Figure 4 & Figure S5
HEK293T_LSM14A-TRIBE-ID_Rapa15min-1	17517360	Figure 4 & Figure S5
HEK293T_LSM14A-TRIBE-ID_Rapa30min-1	20006937	Figure 4 & Figure S5
HEK293T_LSM14A-TRIBE-ID_Rapa60min-1	20935012	Figure 4 & Figure S5
HEK293T_LSM14A-TRIBE-ID_Rapa0min-2	21793697	Figure 4 & Figure S5
HEK293T_LSM14A-TRIBE-ID_Rapa120min-2	17214771	Figure 4 & Figure S5
HEK293T_LSM14A-TRIBE-ID_Rapa15min-2	21756189	Figure 4 & Figure S5
HEK293T_LSM14A-TRIBE-ID_Rapa30min-2	19285963	Figure 4 & Figure S5
HEK293T_LSM14A-TRIBE-ID_Rapa60min-2	18719797	Figure 4 & Figure S5
Nanopore_HCT116_induced_APOBEC1-DDX6_LSM14A-ADAR2dd	5517640	Figure 3 & Figure S4
Nanopore_HEK293T_induced_APOBEC1-DDX6_LSM14A-ADAR2dd	1215112	Figure 3 & Figure S4
illumina_HCT116_induced_APOBEC1-DDX6_LSM14A-ADAR2dd-1	22078844	Figure S4
illumina_HCT116_induced_APOBEC1-DDX6_LSM14A-ADAR2dd-2	20298444	Figure S4
illumina_HCT116_induced_APOBEC1-ADAR2dd-1	20520002	Figure S4
illumina_HCT116_induced_APOBEC1-ADAR2dd-2	19808502	Figure S4
XBP1-Rapa0min-Tg0min-Rep1	35019	Figure 5 & Figure S6
XBP1-Rapa0min-Tg30min-Rep1	38520	Figure 5 & Figure S6
XBP1-Rapa0min-Tg45min-Rep1	48798	Figure 5 & Figure S6
XBP1-Rapa0min-Tg60min-Rep1	50947	Figure 5 & Figure S6
XBP1-Rapa0min-Tg75min-Rep1	6384	Figure 5 & Figure S6
XBP1-Rapa0min-Tg0min-Rep2	39818	Figure 5 & Figure S6
XBP1-Rapa0min-Tg30min-Rep2	27093	Figure 5 & Figure S6
XBP1-Rapa0min-Tg45min-Rep2	35814	Figure 5 & Figure S6
XBP1-Rapa0min-Tg60min-Rep2	46530	Figure 5 & Figure S6
XBP1-Rapa0min-Tg75min-Rep2	5568	Figure 5 & Figure S6
XBP1-Rapa60min-Tg0min-Rep1	83914	Figure 5 & Figure S6
XBP1-Rapa60min-Tg30min-Rep1	37530	Figure 5 & Figure S6
XBP1-Rapa60min-Tg45min-Rep1	46641	Figure 5 & Figure S6
XBP1-Rapa60min-Tg60min-Rep1	81519	Figure 5 & Figure S6
XBP1-Rapa60min-Tg75min-Rep1	10296	Figure 5 & Figure S6
XBP1-Rapa60min-Tg0min-Rep2	77181	Figure 5 & Figure S6
XBP1-Rapa60min-Tg30min-Rep2	36360	Figure 5 & Figure S6
XBP1-Rapa60min-Tg45min-Rep2	50210	Figure 5 & Figure S6
XBP1-Rapa60min-Tg60min-Rep2	275672	Figure 5 & Figure S6
XBP1-Rapa60min-Tg75min-Rep2	14082	Figure 5 & Figure S6
