# Supplementary material for: Systematic characterization of the composition and dynamics of processing body-associated mRNAs
Source: Research Square preprint supplement (doi:10.21203/rs.3.rs-5354706/v1), 2024-12-04
Supplement: Supplementary file 10 [file Supplementary Table 5.xlsx]

## Sheet: Sheet description
Table 5: Targets identified in cells expressing single- or dual-deaminase fusion proteins
Sheet 1	In single-deaminase fusion proteins expressing HCT116 cells
Sheet 2	In PB-TRIBE-STAMP expressing HCT116 cells
Sheet 3	In PB-TRIBE-STAMP expressing HEK293T cells
Sheet 4	In LSM14A-TRIBE-ID expressing HEK293T cells (Bulk RNA-seq)
Sheet 5	In LSM14A-TRIBE-ID expressing HEK293T cells (single-cell RNA-seq)

## Sheet: Sheet 1
LSM14A-ADAR2dd	4E-T-ADAR2dd	APBOEC1-DDX6	PATL1-ADAR2dd	DDX6-ADAR2dd	APOBEC1-PATL1	ADAR2dd-DDX6	LSM14A-APOBEC1	APOBEC1-EDC3	4E-T-APOBEC1	ADAR2dd-LSM14A	APOBEC1-DCP2	APOBEC4-EDC4	ADAR2dd-EDC3	CNOT1-APOBEC1	APOBEC1-LSM14A	CNOT10-APOBEC1	EDC3-ADAR2dd	APOBEC1-CNOT10	DDX6-APOBEC1	DCP2-APOBEC1	APOBEC1-4E-T	ADAR2dd-4E-T	EDC3-APOBEC1	EDC4-APOBEC1	PATL1-APOBEC1	ADAR2dd-PATL1
AACS	AARS1	AASDHPPT	ABCA2	AATF	ABCE1	AATF	ABCE1	AARS1	ABHD10	ACADVL	ACTB	ARPP19	AKAP12	ABHD3	ACTR2	ABHD3	FTH1	ABHD3	ACTB	ACTR2	FTH1	ACTG1	ACTB	ACTB	ACTB
AAGAB	AATF	ABCD3	ABHD4	ABCD3	ABHD10	ACLY	ABHD10	ABHD3	ABHD3	ADARB1	ACTR2	BLVRB	AP2B1	ACTR2	ATF5	ACTB	GAPDH	ACTB	ASPH	ADORA2B	HNRNPH3	ADARB1	DKK1	CCND1	AHNAK
AAK1	ABCA3	ABCE1	ABR	ACLY	ABHD3	ACSL3	ABHD3	ACTB	ACSL4	AHNAK	APLP2	CCHCR1	ARHGDIA	ADORA2B	ATP5F1C	ACTR2	HMGA1	ACTR2	CCND1	ARPC2	HSPA9	ANXA2	GPX4	EDC4	HDAC2
AAMP	ABCC1	ABHD10	ACADVL	ACSL3	ACSL3	ACTN1	ACSL4	ACTG1	ACTB	AKAP12	ASPH	CCND1	CCND1	BRD2	CALCOCO2	ADORA2B	NSMF	ADORA2B	GPX4	CLIC4	MT-CO2	CCT8	KHDRBS1	GPX4	HNRNPK
AAR2	ABCD1	ABHD3	ACLY	ACTG1	ACSL4	ADAM9	ACTB	ACTR2	ACTR2	AP2B1	CCND1	CDH24	CCND3	CALCOCO2	CLIC4	BRD2	PFN1	FAF1	H1-0	EHBP1	MYC	HNRNPA1	MT-CO2	HNRNPH3	PARP1
AARS1	ABCD3	ABI1	ACTB	ACTN1	ACTB	ADAR	ACTG1	ADORA2B	ALCAM	ARF1	CDK2AP1	CGGBP1	DDOST	CLIC4	FAF1	CLIC4	RPL13A	HNRNPH3	HSPA8	FAF1	PABPC1	HSPA8	PARP1	PARP1	SRP72
AASDHPPT	ABCE1	ABRACL	ACTG1	ACTN4	ACTG1	ADARB1	ACTR2	AFF4	AP2B1	ATP1A1	CERS6	COL6A2	EEF1A1	CSNK1G2	FOXO3	FAF1	RPL35	IL27RA	ITM2B	HNRNPH3	PARP1	KDM5B	SURF4	SERBP1
AASS	ABHD12	ACADM	ACTN1	ACTR3	ACTR2	ADGRG6	ACTR3	AGRN	AP3S1	ATP2B4	COL6A2	CYP24A1	EEF1A2	EHBP1	GLO1	HNRNPH3	RPL36	IRF2BPL	MSI2	ISYNA1	TKT	MDH2	TRAM1
AATF	ABHD14B	ACADSB	ACTN4	ADAM9	ACTR3	ADH5	ADAM10	AKIRIN1	ARCN1	CAPRIN1	COPA	DCBLD2	EEF2	FAF1	HNRNPH3	IL27RA	RPS14	KAT5	PARP1	KAT5	TNPO1	TIMP1
ABAT	ABHD2	ACAP2	ACTR1A	ADAR	ADAM10	ADIPOR2	ADAM9	ALCAM	ARF6	CCT8	COPS6	DDIT4	ERGIC3	HNRNPH3	LSM14A	IRF2BPL	RPS19	MT-CO2	RPL4	MT-CO2	UBE2K	VDAC2
ABCA2	ABHD3	ACBD5	ACTR2	ADARB1	ADAM9	AGRN	AFF4	ANAPC13	ARHGAP29	COPG1	CTC1	DSG2	FGFRL1	IL27RA	MKI67	KAT5	RPS27	PARP1	RPS11	PARP1	UHMK1
ABCA3	ABHD4	ACLY	ADAM9	ADH5	ADGRG6	AHNAK	ALCAM	AP2B1	ARL5B	DCTN1	CYCS	EGR1	FLII	IRF2BPL	PARP1	MT-CO2	RPS27A	SLC25A23	TMED7	SLC25A23	ZNF770
ABCA5	ABI1	ACO1	ADAR	AHNAK	AFF4	AKAP12	AMMECR1	API5	ARL6IP1	DDOST	CYP24A1	F2R	FTH1	KAT5	PIGS	NTSR1	RPS29	TPM4	TOMM20	TNFRSF18
ABCA7	ABI2	ACP1	ADCY6	AKAP12	ALCAM	AKAP13	ANP32E	APLP2	ARPP19	DDX3X	DSG2	FOXC1	FURIN	KCNAB2	SEMA6B	PARP1	RPS3
ABCB1	ABL1	ACSL3	ADGRL1	AKAP13	ANP32E	AKAP8L	ANXA1	ARCN1	ASPH	DHCR24	EIF5A	FRS2	GAPDH	MT-CO2	SLC25A23	PCNA	TIMP1
ABCB7	ABL2	ACSL4	ADIPOR2	AKAP8L	ANXA1	AMD1	ANXA5	ARF3	ATAD1	DIAPH1	EREG	GNG12	GPX1	NGFR	TMED7	SAMD1	YWHAZ
ABCB8	ABLIM1	ACSL5	ADNP2	ANKRD17	AP1AR	ANKRD17	AP1AR	ARF4	ATXN7L3B	DSTN	EZR	HMGA1	HMGA1	P4HB	UBALD1	SLC25A23
ABCC1	ABR	ACTB	AFF4	ANKRD52	APLP2	ANKRD52	APLP2	ARHGAP18	AZIN1	EEF1A1	FOXC1	HMGA2	ITM2C	PARP1	WDR6	TMED7
ABCC10	ACAP2	ACTG1	AGPAT1	ANXA2	APP	ANXA2	ARHGAP18	ARHGEF12	BCLAF1	EEF1A2	GANAB	HSPA13	KDELR1	PCNA	WSB2	TPM4
ABCC4	ACBD5	ACTR2	AGPAT3	ANXA6	ARCN1	AP2B1	ARHGAP29	ARL2BP	BIRC2	EEF1D	GPD2	IRF7	LSR	PES1	YES1	XPR1
ABCD1	ACLY	ACTR3	AGRN	AP1B1	ARF4	APH1A	ARHGAP5	ARL5B	BLOC1S6	EEF2	H1-0	KCNK1	MTPN	SAMD1
ABCD3	ACO2	ADAM10	AHCYL2	AP1G1	ARF6	APLP2	ARL5B	ARPP19	CALM2	EIF3M	HIGD1A	KHDRBS1	NDUFB2	SLC25A23
ABCE1	ACP1	ADAM17	AHDC1	AP2B1	ARHGAP18	APMAP	ARPP19	ATAD1	CANX	EWSR1	HMGCR	MAL2	P4HB	SLC50A1
ABCF1	ACP2	ADAM19	AHNAK	APH1A	ARHGAP29	APP	ASPH	ATG12	CAV1	FLNA	HNRNPA2B1	MAP7D1	PDLIM7	SRP68
ABCF3	ACSL3	ADAM9	AIP	APLP2	ARHGEF12	ARF1	ATF7IP	ATP13A3	CAV2	FTH1	HNRNPA3	MED30	PFN1	TMED7
ABHD10	ACSL4	ADAR	AKAP12	APP	ARL15	ARL6IP1	ATG12	ATP2A2	CCND1	GAPDH	HNRNPC	MIDN	PIGS	TPM4
ABHD12	ACTB	ADD1	AKAP13	ARF1	ARL5B	ARPC2	ATP11B	ATXN7L3B	CCNI	GPX1	HSD17B12	MTPN	QSOX1	ZNHIT3
ABHD17A	ACTG1	ADD3	AKAP8L	ARF3	ARL6IP1	ASH1L	ATP13A3	AZIN1	CCNT1	HNRNPA1	HSPA13	MYC	RAB1B
ABHD2	ACTN1	ADGRG6	AKIRIN1	ARMT1	ARL6IP5	ATF4	ATP6AP2	B4GALT5	CD164	HSPA8	IDH1	NIP7	RAB5C
ABHD3	ACTN4	ADIPOR1	AKT2	ARPC1A	ARPP19	ATP11B	ATP6V1A	BAZ2A	CD2AP	HUWE1	IGFBP2	NUDT21	RHOA
ABHD4	ACTR1A	ADNP	ALDOC	ARPC2	ASPH	ATP1A1	B3GNT5	BBX	CDK6	HYOU1	ITGB4	NUDT4	RHOC
ABHD8	ACTR1B	AEBP2	ALKBH5	ARPP19	ATAD1	ATP2B4	BCLAF1	BLOC1S6	CFAP97	IMPDH2	KCTD3	PANK3	RPL13A
ABI1	ACTR2	AFF4	AMFR	ASH1L	ATG12	ATP6V1C1	BMPR2	BPNT2	CHP1	ITGA3	KHDRBS1	PDP1	RPL15
ABI2	ACTR3	AGL	AMOTL2	ASPH	ATP13A3	BAG6	BNIP2	C5orf24	CLIC4	ITPR3	LANCL1	PLAUR	RPL18A
ABL1	ACVR2B	AGPAT5	ANKRD52	ASXL1	ATP2A2	BANF1	BNIP3L	C5orf51	CLTC	KIAA1191	MACROH2A1	PNPLA6	RPL35
ABL2	ADAM15	AGPS	ANO6	ATP11B	ATP6AP2	BIRC6	BPNT2	CAB39	CSDE1	KMT2D	MAL2	PPP1R9B	RPL36
ABLIM1	ADAM9	AHCYL1	AP1B1	ATP1A1	ATP6V1A	BTBD1	C21orf91	CACUL1	CTDSPL2	LASP1	MAP7D1	PTBP3	RPLP1
ABR	ADAR	AIDA	AP1G1	ATP2B4	ATXN7L3B	CALM1	C5orf24	CALM1	CYCS	MAGED1	MED13L	RASSF3	RPS14
ABRAXAS2	ADARB1	AK3	AP2A1	ATP5F1A	AZIN1	CALU	CACUL1	CALM2	DCBLD2	METAP1	MOSPD3	RNF11	RPS16
ACAA1	ADCY6	AKAP11	AP2B1	ATP5F1B	B2M	CAPRIN1	CALD1	CALU	DCP2	MLEC	MSN	SETD7	RPS19
ACACA	ADCY7	AKAP12	AP2M1	ATP5F1E	BAG4	CAPZA1	CALU	CANX	DESI2	NACC1	MSX1	SINHCAF	RPS2
ACAD8	ADCY9	AKIRIN1	APH1A	ATP6V1C1	BBX	CASP7	CAMSAP2	CCDC47	DKK1	NCOA4	NACC1	SLC38A1	RPS27
ACAD9	ADD1	ALCAM	APLP1	BAG6	BCLAF1	CAVIN1	CANX	CCDC85B	EIF1AX	NFKB2	NQO1	SLC38A2	RPS27A
ACADM	ADD3	ALDH1A3	APLP2	BAHD1	BMI1	CBX5	CAPN2	CCND1	EIF2AK1	NOP58	PERP	SNAP47	RPS29
ACADS	ADGRG1	AMD1	APMAP	BANF1	BMPR2	CCND1	CAV2	CD47	EIF4G2	PARP4	PPP1R9B	SURF4	RPS3
ACADSB	ADGRG6	ANAPC13	APP	BAZ2A	BPNT2	CCNI	CBFB	CERS6	ELMOD2	PDLIM5	PRKAR1A	TAOK1	RPS3A
ACADVL	ADGRL1	ANP32E	ARC	BIRC6	BSG	CCT8	CCDC186	CGGBP1	EREG	PIGS	PTGES3	TBC1D14	RPSA
ACAP2	ADH5	ANXA1	ARCN1	BTBD1	BZW1	CDC37	CCND1	CHMP3	ETNK1	PRPF8	PTPN11	TMED10	SLC7A5
ACAP3	ADIPOR2	ANXA3	ARF1	C11orf58	C11orf58	CFL1	CCNT1	CHP1	F2RL1	PRRC2A	REEP3	TMED5	SZRD1
ACAT1	ADNP	ANXA5	ARF3	CALM1	C21orf91	CISD2	CD164	CLDND1	FAM160B1	PSAP	REEP5	TMED7	TIMP1
ACAT2	ADNP2	AP1AR	ARHGAP1	CALU	C5orf15	CLSTN1	CD2AP	CLIC4	FAM168B	PSIP1	RHOA	TP53INP1	TPI1
ACBD5	ADO	AP2B1	ARHGAP35	CAPRIN1	C5orf24	CLTC	CD44	CLTC	FAM199X	PSMD1	SEC11A	TRAM1	TUFM
ACER3	AEN	AP3S1	ARHGDIA	CAPZA1	CAB39	CNN2	CFAP97	CNIH1	FAM91A1	PTTG1IP	SET	TRIB1	VCL
ACIN1	AFDN	AP4E1	ARHGEF11	CAVIN1	CALM1	CNOT1	CGGBP1	COPA	FEM1B	QSOX1	SLC44A2	TWSG1
ACLY	AFF1	APC	ARID1A	CBX5	CALM2	CNOT6	CLIC4	COPB1	FGD4	RHOC	STMN1	ZFP36L1
ACO1	AFF4	API5	ARL6IP1	CBX6	CALM3	COL12A1	CLTC	CPNE3	FNBP1L	RPL13A	SUDS3	ZKSCAN8
ACO2	AGAP2	APLP1	ARMT1	CCND1	CALU	COX7C	CMTM6	CSNK2A1	G3BP1	RPL15	SURF4
ACOT11	AGFG1	APLP2	ARPC1A	CCND3	CAMSAP2	CRTAP	CNIH1	CYCS	GMFB	RPL18	TBC1D14
ACOT7	AGO1	APMAP	ARPC2	CCNI	CANX	CSDE1	CPD	DAG1	GNG12	RPL18A	THRAP3
ACOT9	AGO2	APP	ARPC4	CCT3	CAPRIN1	CTNNB1	CPEB4	DCAF7	GPBP1	RPL19	TMSB10
ACOX1	AGPAT1	ARCN1	ARPC5L	CCT7	CAPZA2	CTR9	CPNE3	DCBLD2	GPBP1L1	RPL29	TPI1
ACP1	AGPAT3	ARF1	ARPP19	CCT8	CAV2	DBN1	CPOX	DCTD	GPD2	RPL35	TRAM1
ACP2	AGPAT5	ARF3	ASPH	CDC37	CBFB	DCTN1	CREB1	DDX42	GPX4	RPL36	TRIB1
ACSF2	AHCYL1	ARF4	ATF4	CEMIP2	CCDC186	DCTN4	CSNK2A1	DEK	GTF2A1	RPL38	UBB
ACSL1	AHCYL2	ARF6	ATG13	CFL1	CCDC47	DDX17	CTDSPL2	DENR	H1-0	RPL6	VASP
ACSL3	AHDC1	ARFGEF3	ATG4B	CLTC	CCND1	DDX3X	CTNNB1	DNAJB14	H3-3B	RPL8	YAP1
ACSL4	AHNAK	ARFIP1	ATL3	CNDP2	CCNG1	DDX6	CYCS	DNAJC3	HELZ	RPLP1	YWHAQ
ACSL5	AHR	ARHGAP12	ATMIN	CNN2	CCNG2	DHCR24	DCBLD2	DSTN	HNRNPC	RPS14	YWHAZ
ACSS2	AIF1L	ARHGAP18	ATN1	CNOT1	CCNI	DHRS7	DCP2	EIF4EBP2	HSDL1	RPS16
ACTB	AIFM2	ARHGAP29	ATP11B	CNP	CD164	DHX15	DDX3X	ENTPD4	HSPA9	RPS18
ACTG1	AIP	ARHGAP5	ATP13A2	COL12A1	CD2AP	DHX30	DESI2	EPAS1	IDI1	RPS19
ACTN1	AJUBA	ARHGEF12	ATP1A1	COPB1	CD46	DHX9	DLD	EREG	ITPRID2	RPS2
ACTN4	AK2	ARHGEF9	ATP2A2	CORO1C	CD81	DIAPH1	DNAJA1	ERO1A	LIMS1	RPS26
ACTR1A	AKAP11	ARL1	ATP2B4	COX4I1	CDC27	DIS3	DNAJB14	FAF1	LNPEP	RPS27
ACTR1B	AKAP12	ARL2BP	ATP5MC2	COX7C	CDCP1	DLD	DPY19L1	FAM3C	LRRC58	RPS27A
ACTR2	AKAP13	ARL5B	ATP5MF	CRTAP	CEP20	DNM2	DPY19L4	FAM8A1	MAL2	RPS29
ACTR3	AKAP8L	ARL6IP1	ATP6V0A1	CSDE1	CGGBP1	DSP	DSTN	FKBP1A	MBNL1	RPS3
ACVR1B	AKIRIN1	ARL6IP5	ATP6V0D1	CSNK1A1	CHMP2B	DSTN	EFR3A	FKBP5	MBNL2	RPS6
ACVR2B	AKIRIN2	ARL8B	ATP6V0E2	CTNNA1	CHORDC1	DUSP14	EIF4A2	FNBP1L	MCL1	SCD
ADAM10	AKR1A1	ARMT1	ATP6V1B2	CTNNB1	CISD3	DYNC1H1	EIF4G2	FYTTD1	MDM2	SLC1A5
ADAM15	AKT1	ARPC5	ATP6V1C1	CTR9	CLDND1	DYNC1LI2	ELK4	G3BP2	MED13	SNRNP200
ADAM17	AKT2	ARPP19	ATP6V1E1	DCAF7	CLIC4	DYNLL2	ELOVL5	GABARAPL2	MIB1	TAF15
ADAM9	ALAD	ASAH1	ATP6V1H	DCTN1	CLTC	EBP	EMP1	GCH1	MKI67	TIMP1
ADAR	ALAS1	ASPH	ATXN7L3	DCTN4	CMPK1	EEF1A1	ENPP4	GLO1	MLEC	TPI1
ADARB1	ALCAM	ATAD1	B2M	DDOST	CNBP	EEF1A2	EREG	GLUL	MOB1B	TPT1
ADCY3	ALDH3A2	ATF7IP	B3GAT3	DDX3X	CNIH1	EEF1D	ERI1	GNG12	MRFAP1	TUFM
ADCY6	ALDOC	ATG12	B4GALT1	DDX6	COPS2	EEF2	ERMP1	GNPNAT1	MSI2	VCL
ADCY7	ALG14	ATP11B	BAHD1	DHCR24	CPD	EFR3A	ERO1A	GNS	MT-CO2	YWHAZ
ADCY9	ALG3	ATP13A3	BANF1	DHX15	CPNE3	EGR1	ETNK1	GOLPH3	MTHFD2
ADD1	ALKBH5	ATP1A1	BAZ1B	DHX30	CPOX	EHBP1L1	F2RL1	GPD2	MTPN
ADD3	ALOXE3	ATP2A2	BAZ2A	DHX9	CREB1	EIF3A	FAM122B	GRPEL2	MTX3
ADGRA3	AMBRA1	ATP2B1	BCL2L1	DIAPH1	CSDE1	EIF3D	FAM126B	GSK3B	NHLRC2
ADGRE5	AMD1	ATP2B4	BCL2L13	DIS3	CSNK1G3	EIF3F	FAM160B1	HACD2	NOLC1
ADGRG1	AMFR	ATP2C1	BCL9L	DLD	CTDSPL2	EIF3M	FAM169A	HIGD1A	NUCKS1
ADGRG6	AMMECR1	ATP5PB	BCLAF1	DSP	CTSB	EIF4B	FAM199X	HMG20B	NUDT21
ADGRL1	AMMECR1L	ATP6AP1	BECN1	DSTN	CYCS	EIF4G1	FAM3C	HMGA2	NUFIP2
ADH5	AMOTL1	ATP6AP2	BMI1	DYNC1H1	CYP24A1	EP300	FAM91A1	HNRNPC	NUP58
ADI1	AMOTL2	ATP6V1A	BPNT2	DYNC1I2	DBI	EP400	FAM98B	HNRNPH3	OSBPL8
ADIPOR1	AMPD2	ATP6V1B2	BRK1	DYNC1LI2	DCBLD2	EPAS1	FEM1B	HNRNPK	PABPC1
ADIPOR2	AMZ2	ATP6V1C1	BSG	DYNLL2	DCUN1D1	EPPK1	FNBP1L	HSD17B12	PAFAH1B1
ADK	ANAPC13	ATP6V1G1	C11orf58	EBP	DDX3X	EPRS1	FOXN2	HSDL1	PANK3
ADNP	ANGEL1	ATP7A	C1orf115	EEF1A1	DDX6	ERBB2	FTH1	IDH1	PARP1
ADNP2	ANKH	ATRX	C1orf216	EEF1A2	DEK	ERGIC3	G3BP1	INSIG1	PAWR
ADPGK	ANKLE2	ATXN7L3B	C4orf3	EEF1D	DESI2	EWSR1	G3BP2	IQGAP1	PDP1
AEBP2	ANKRD11	AZIN1	C5orf51	EEF2	DNAJB14	FAF2	GABPA	KIF5B	POLR2A
AEN	ANKRD13A	B2M	C6orf62	EGR1	DNAJC10	FAM120B	GDA	KITLG	PPP1CB
AFDN	ANKRD13C	B3GNT5	C6orf89	EHBP1L1	DR1	FAM168A	GHITM	LAMC1	PPP1CC
AFF1	ANKRD17	B4GALT1	CACUL1	EIF3A	DSTN	FAM32A	GLO1	LANCL1	PPP4R2
AFF4	ANKRD50	BAG2	CALCOCO2	EIF3D	DYNC1LI2	FASN	GMFB	LAPTM4B	PRELID3B
AFG3L2	ANKRD52	BAG4	CALM1	EIF3F	EFR3A	FAT1	GNS	LEPROTL1	PRKACB
AGAP2	ANKS1A	BBX	CALM3	EIF3I	EID1	FLII	GOLM1	LIPA	PTGES3
AGAP3	ANO6	BCLAF1	CALU	EIF3L	EIF4G2	FLNA	GOLM2	LITAF	PTPN11
AGFG1	ANP32E	BIRC2	CAMKK2	EIF3M	EIF5A	FLNB	GPD2	LIX1L	PUM2
AGL	ANTXR1	BLOC1S2	CAMSAP2	EIF4B	ELOC	FLNC	GPX4	LMAN1	RAB10
AGO1	ANXA11	BLOC1S6	CAMTA2	EIF4EBP2	ELOVL5	FRYL	GRPEL2	MAGT1	RAC1
AGO2	ANXA2	BLZF1	CANT1	EIF4G1	ERO1A	FSTL3	GSPT1	MAL2	RAD23B
AGPAT1	ANXA6	BMI1	CANX	ENO1	FAM102B	FTH1	GTF2A1	MAOB	RC3H2
AGPAT2	ANXA7	BMP2K	CAPG	EP400	FAM171B	FUBP3	H1-0	MAP1LC3B	RFLNB
AGPAT3	AP1B1	BMPR2	CAPRIN1	EPAS1	FAM199X	G3BP2	HELZ	MAP2K1	RO60
AGPAT5	AP1G1	BNIP2	CAPZA1	EPB41L2	FAM3C	GAPDH	HIGD1A	MAPK1	RPL13
AGPS	AP2A1	BNIP3	CASC3	EPCAM	FAM91A1	GAPVD1	HIPK1	MARCHF6	RPL14
AGRN	AP2B1	BNIP3L	CAVIN1	EPHX1	FBXO28	GBF1	HLTF	MKNK2	RSF1
AGTPBP1	AP2M1	BPNT2	CBL	EPPK1	FEM1B	GCN1	HMGB3	MLEC	SCD
AHCTF1	AP3D1	BRI3BP	CBX5	EPRS1	FKBP1A	GIGYF2	HMGCS1	MMGT1	SEL1L
AHCY	AP3M1	BROX	CBX6	ERGIC3	G3BP1	GNB1	HMGN1	MSMO1	SELENOI
AHCYL1	AP3S1	BRWD1	CCDC120	EWSR1	GABPA	GNPTAB	HNRNPA1	MSN	SET
AHCYL2	AP5B1	BSG	CCM2	EXOSC9	GANAB	GOLGB1	HNRNPA2B1	MTPN	SKA2
AHDC1	AP5M1	BTBD1	CCND1	FAM120B	GCH1	GPI	HNRNPAB	MVK	SLC38A1
AHI1	APBB1	BTG3	CCND3	FAM168A	GHITM	GSE1	HNRNPC	MXRA7	SLC38A2
AHNAK	APEH	BUB3	CCNI	FAM32A	GLO1	GTF3C1	HNRNPH3	MYO1E	SOCS4
AHNAK2	APH1A	BZW1	CCT8	FASN	GLUL	HACD3	HNRNPK	NCKAP1	SP1
AHSA1	APLP1	C11orf58	CD164	FAT1	GMFB	HDAC1	HOOK1	NCOA4	SPCS3
AIDA	APLP2	C12orf29	CD276	FLII	GNA13	HDAC2	HP1BP3	NIP7	STYX
AIF1L	APMAP	C12orf75	CD2AP	FLNA	GNG12	HECTD1	HS2ST1	NUDT21	TAOK1
AIFM1	APP	C16orf72	CD82	FLNB	GNS	HELZ2	HSD17B12	NUP153	TBL1XR1
AIP	APPBP2	C1GALT1	CDC42	FLNC	GOLM1	HEXIM1	HSP90AA1	PAK2	TCEA1
AJM1	ARAP1	C1QBP	CDC42BPB	FRYL	GOLM2	HID1	HSPA13	PANK3	TCF7L2
AJUBA	ARC	C4orf3	CDC42EP4	FTH1	GPD2	HMGCR	HSPA8	PAPOLA	TKT
AK2	ARCN1	C5orf15	CDCP1	FURIN	GPX1	HNRNPA1	HSPA9	PARP1	TMED10
AK3	AREL1	C5orf22	CDH1	FUS	GTF2A1	HNRNPK	IDH1	PCBP2	TMED7
AK4	ARF1	C6orf62	CDIP1	G3BP2	H1-0	HNRNPU	IDI1	PCGF3	TMEM106B
AKAP11	ARF3	CAAP1	CDKN1A	GANAB	H1-10	HSPA4	INSIG1	PCNP	TMEM123
AKAP12	ARF4	CAB39	CELF1	GAPDH	HECA	HSPA8	IQGAP1	PDLIM5	TMEM167A
AKAP13	ARF5	CACUL1	CEMIP2	GAPVD1	HIGD1A	HSPH1	ITGA6	PDP1	TMEM30A
AKAP8	ARF6	CALD1	CENPB	GBF1	HLTF	HUWE1	ITGB1	PGAM1	TNFRSF10B
AKAP8L	ARFGAP1	CALM1	CEP170B	GCN1	HMGCS1	HYOU1	ITPRID2	PGRMC1	TNPO1
AKAP9	ARFGAP2	CALM2	CERCAM	GGNBP2	HNRNPA2B1	ILF3	KDM7A	PLEKHB2	TOMM20
AKIRIN1	ARFGEF1	CALM3	CHMP1A	GIGYF2	HNRNPAB	IMPDH2	KHDRBS1	PPFIBP1	TOMM70
AKIRIN2	ARFGEF2	CALU	CHMP4B	GNB1	HNRNPC	IPO5	KIF5B	PPP1CB	TPD52
AKR1A1	ARHGAP1	CAMSAP2	CIC	GNS	HNRNPH3	IPO7	KITLG	PPP1CC	TWSG1
AKT1	ARHGAP23	CANX	CIRBP	GOLGB1	HNRNPK	IQGAP1	KLHL15	PPTC7	TXNRD1
AKT2	ARHGAP27	CAPN2	CLDND1	GPATCH8	HNRNPR	IREB2	KLHL28	PRDX1	UBE2K
ALAD	ARHGAP35	CAPRIN1	CLIC4	GPI	HSBP1	ISG15	KLHL8	PRKACB	UHMK1
ALAS1	ARHGAP39	CAPZA1	CLSTN1	GPX1	HSD17B12	ITGA3	LANCL1	PRKAR1A	XIAP
ALCAM	ARHGDIA	CAPZA2	CLTB	GTF3C1	HSP90AA1	ITGA5	LARP4	PRNP	YAP1
ALDH18A1	ARHGEF1	CARNMT1	CLTC	H1-0	HSP90B1	JUP	LCOR	PSAT1	YWHAZ
ALDH1A3	ARHGEF11	CASP7	CMTM4	HACD3	HSPA13	KDELR1	LIMS1	PSMB2	ZBTB10
ALDH1B1	ARHGEF17	CAV1	CMTM6	HADHA	HSPA9	KDM5B	LIPA	PTP4A2	ZFAND6
ALDH2	ARHGEF18	CAV2	CNN2	HADHB	IDH3A	KDM5C	LMAN1	PTPN11	ZNF664
ALDH3A2	ARHGEF19	CBFB	CNN3	HDAC1	IMPA1	KHSRP	LNPEP	PXN	ZNF770
ALDH5A1	ARHGEF2	CBX1	CNOT1	HDLBP	INSIG1	KIAA0232	LRRC58	RAB11A
ALDH7A1	ARHGEF3	CBX3	CNOT6	HECTD1	IPO7	KIAA1191	LRRFIP1	RAB14
ALDOC	ARHGEF4	CBX5	CNP	HELZ	ITGB1	KLHL9	LSM14A	RAB31
ALG12	ARHGEF5	CCDC47	COL6A2	HEXIM1	ITM2B	KMT2A	LYPLA1	RAB7A
ALG14	ARHGEF7	CCDC6	COPRS	HINT1	KDM1B	LARS1	LYSMD3	RAD21
ALKBH5	ARID1A	CCNC	COPZ1	HMGA1	KIAA1191	LRBA	MAD2L1	RAP2B
ALS2	ARID1B	CCND1	CORO1B	HMGCR	KIF5B	LRP10	MAGEB2	RASSF3
AMBRA1	ARID3B	CCNG1	CORO1C	HNRNPA1	KLHL15	LRPPRC	MAL2	RBFOX2
AMD1	ARIH1	CCNG2	COTL1	HNRNPK	KLHL28	LSR	MAN1A2	RBM3
AMFR	ARL1	CCNI	CPD	HNRNPU	KPNA3	MAGED1	MAP3K2	REEP5
AMMECR1	ARL2BP	CCNT1	CPNE1	HSP90AA1	KRAS	MAP4	MAPK1	RHOA
AMMECR1L	ARL5B	CCT6A	CREBZF	HSPA4	LAMP1	MATR3	MAT2B	RNMT
AMOTL1	ARL6IP1	CCT8	CRKL	HSPA8	LANCL1	MCM3AP	MBNL1	RPRD1A
AMOTL2	ARL8B	CD109	CRTAP	HSPH1	LAPTM4B	MDH2	MBNL2	RRM2B
AMPD2	ARMC1	CD164	CS	HUWE1	LARP4	MET	MDM2	RTN4
AMZ2	ARMC7	CD2AP	CSDE1	HYOU1	LIN7C	MIF	MED13	RYBP
ANAPC1	ARMCX3	CD44	CSNK1D	IDE	LRRC58	MLEC	MEX3C	SCD5
ANAPC13	ARMH3	CD46	CSNK1G1	IFITM3	LSM14A	MSN	MGAT4A	SCOC
ANAPC2	ARMT1	CD59	CSNK1G2	IK	LYSMD3	MST1R	MIB1	SDC4
ANAPC5	ARNT	CD81	CSNK2A1	ILF3	MAGT1	MTPN	MINDY2	SEL1L
ANGEL1	ARPC1A	CD9	CSRP1	IMPDH2	MAL2	MYH9	MLEC	SEPTIN2
ANKEF1	ARPC2	CDC27	CST6	INPP5J	MAP1LC3B	MYO1D	MOB1B	SEPTIN8
ANKFY1	ARPC4	CDC42	CSTB	IPO7	MAPK6	NACA	MORF4L2	SERINC1
ANKH	ARPC5L	CDC42SE2	CTDSP2	IQGAP1	MBNL1	NACC1	MRTFB	SERPINB9
ANKIB1	ARPP19	CDC7	CTNND1	IREB2	MBNL2	NBR1	MSI2	SETD7
ANKLE2	ARRB2	CDCP1	CYB5B	ISG15	MCL1	NCOA4	MT-CO2	SHARPIN
ANKRD10	ASAP1	CDH1	CYB5R3	ITGA3	MED13	NDFIP2	MTDH	SHC1
ANKRD11	ASB1	CDK1	CYTH1	ITGB1	MEX3C	NDUFB2	MTHFD2	SKA2
ANKRD13A	ASB6	CDK2AP1	DAG1	ITM2C	MIB1	NDUFV1	MTMR6	SLC17A5
ANKRD13C	ASB7	CDK6	DAP	ITPR3	MKI67	NFE2L1	MTPN	SLC25A23
ANKRD17	ASCC3	CDV3	DAZAP2	JUP	MMGT1	NFKB2	MZT1	SLC39A7
ANKRD28	ASH1L	CEBPZOS	DBN1	KDM5B	MOB1A	NMD3	NAA50	SLC39A9
ANKRD40	ASMTL	CELF1	DCAF7	KDM5C	MOB4	NOP53	NAB1	SLC41A1
ANKRD46	ASPH	CEP97	DCTN1	KHSRP	MOCS2	NOP58	NAP1L1	SOD2
ANKRD50	ASPHD2	CERS2	DCTN4	KIAA0232	MPP7	NPEPPS	NBR1	SP1
ANKRD52	ASXL1	CERS6	DCTN5	KIAA1191	MPZL1	NSD1	NCKAP1	SPCS3
ANKRD54	ASXL2	CETN2	DCXR	KIDINS220	MRFAP1	NSMF	NDUFA5	SPIN1
ANKS1A	ATAD1	CFAP97	DDA1	KLHL9	MRPL42	NT5C2	NDUFB5	SPRING1
ANKZF1	ATE1	CFL1	DDOST	KRT8	MSI2	NUFIP2	NEK7	SRSF2
ANLN	ATF3	CFL2	DDR1	LAMB3	MSN	NUP188	NHLRC2	STK39
ANO6	ATF4	CGGBP1	DDX17	LAMC1	MT-CO2	OSBPL8	NMD3	SUDS3
ANP32A	ATF5	CHD9	DDX6	LARS1	MTDH	OSGIN2	NOLC1	SUMO1
ANP32B	ATF6	CHEK1	DGCR2	LGALS3BP	MTHFD2	PAPSS1	NR1D2	SURF4
ANP32E	ATF6B	CHM	DGKZ	LGMN	MTMR6	PARP4	NUCKS1	SZRD1
ANTXR1	ATF7	CHMP1B	DHCR24	LIMA1	MTPN	PCBP4	NUDT21	TAOK1
ANXA1	ATF7IP	CHMP2B	DHCR7	LRBA	NAA50	PCMT1	NUFIP2	TGFA
ANXA11	ATG13	CHMP3	DIAPH1	LRP10	NAB1	PDCD6IP	NUP58	TGOLN2
ANXA2	ATG2A	CHMP5	DLD	LRPPRC	NCOA4	PDLIM5	NUS1	TIMP2
ANXA5	ATG4B	CHORDC1	DLG5	LRRC59	NDFIP1	PDLIM7	OAT	TMBIM1
ANXA6	ATG4D	CHP1	DLST	LSR	NOLC1	PFN1	ODC1	TMBIM6
ANXA7	ATG9A	CISD2	DNAJC3	MAGED1	NPTN	PHC2	OSBPL8	TMED10
AOC1	ATL3	CKAP2	DNAJC5	MAP4	NUCKS1	PICALM	PAK2	TMED2
AP1B1	ATMIN	CLDND1	DNM2	MATR3	NUDT21	PIGS	PALLD	TMED7
AP1G1	ATN1	CLIC4	DOK4	MAZ	NUDT4	PLEC	PANK3	TMEM263
AP1M1	ATP11A	CLINT1	DPF2	MDH2	NUP58	PLRG1	PAQR3	TMEM50A
AP1M2	ATP11B	CLIP4	DPY19L1	MIF	OSBPL8	PNPLA2	PARP1	TMEM98
AP1S1	ATP11C	CLNS1A	DSP	MKI67	OTUD6B	PNRC2	PCDH7	TNFRSF10B
AP2A1	ATP13A3	CLOCK	DSTN	MLEC	OXR1	PPFIBP1	PDIA6	TNFRSF10D
AP2A2	ATP1A1	CLSTN1	DUSP14	MMADHC	PAFAH1B2	PRKAR1A	PDLIM5	TNKS2
AP2B1	ATP1B3	CLTC	DUSP3	MRFAP1	PAK2	PRKDC	PDP1	TOMM20
AP2M1	ATP2A2	CMAS	DYNC1LI2	MSN	PANK3	PRPF8	PDZD8	TOMM70
AP2S1	ATP2A3	CMPK1	DYNLL2	MST1R	PAPOLA	PRR14L	PERP	TPD52
AP3B1	ATP2B1	CMTM6	E2F4	MTPN	PAQR3	PRRC2A	PGAM1	TPP1
AP3D1	ATP2B4	CNBP	EAF1	MYH9	PARP1	PRRC2C	PGK1	TRAM1
AP3M1	ATP5F1A	CNIH1	EBP	MYO1D	PCDH7	PSMC4	PGRMC1	TSN
AP4E1	ATP5F1B	CNN3	ECE1	MYOF	PCNP	PSMD1	PHF20	TSPYL1
AP5B1	ATP5F1E	CNOT6	EDC3	NACA	PDIA3	PSMD8	PHIP	TUBB4A
AP5M1	ATP5MC2	CNOT7	EEF1A1	NACC1	PDIA6	PTTG1IP	PKN2	TVP23B
AP5Z1	ATP5MC3	COL12A1	EEF1A2	NBL1	PDP1	PUM2	PLEKHB2	UBE2K
APBB1	ATP5MF	COPA	EEF1D	NBR1	PEBP1	QSOX1	PPAT	UFM1
APBB2	ATP5PD	COPS2	EEF2	NCOA4	PFN1	RAB14	PPIP5K2	VCL
APC	ATP5PF	COQ10B	EFR3A	NDFIP2	PGAM1	RAB2A	PPP1CB	VGLL4
APEH	ATP6AP1	CORO1C	EGR1	NDUFAB1	PGK1	RAB5C	PPP3CA	VPS26A
APH1A	ATP6AP2	COTL1	EHBP1L1	NDUFV1	PGRMC1	RANBP2	PPP4R2	WASL
API5	ATP6V0A1	CPD	EIF3F	NFE2L1	PLEKHA1	RARS1	PPP6R3	WWTR1
APLP1	ATP6V0D1	CPE	EIF4B	NFKB2	PLEKHB2	RBM12	PPTC7	XPR1
APLP2	ATP6V0E1	CPNE3	EIF4EBP2	NMD3	PLS1	RDX	PRDX1	YIPF6
APMAP	ATP6V0E2	CPOX	EIF4G1	NOL11	POLR2M	REPS1	PRDX3	YWHAB
APP	ATP6V1A	CPSF6	EIF4H	NONO	POLR3G	RER1	PRELID3B	YWHAE
APPBP2	ATP6V1B2	CREB1	EIF5A	NOP53	PPFIBP1	RHOA	PRKAA1	YWHAQ
APPL1	ATP6V1C1	CREG1	ELF4	NOP58	PPP1CB	RHOC	PRKACB	YWHAZ
APPL2	ATP6V1E1	CRIM1	ELOC	NPEPPS	PPP1CC	RMND5A	PRKAR1A	ZDHHC20
APRT	ATP6V1F	CRYZ	EMC10	NSD1	PPP3R1	RNF103	PRKDC	ZDHHC9
AQR	ATP6V1H	CS	ENSA	NSF	PPP4R2	RPL11	PRPF40A
ARAP1	ATPAF1	CSDE1	ENTPD6	NSMF	PPP6R3	RPL13	PTAR1
ARAP2	ATRN	CSE1L	EP300	NT5C2	PPTC7	RPL13A	PTGES3
ARAP3	ATXN1	CSNK2A1	EPAS1	NUCKS1	PRDX1	RPL15	PTPN11
ARC	ATXN1L	CSTF2T	EPHA2	NUFIP2	PRDX3	RPL18	PUM2
ARCN1	ATXN2	CTDSPL2	EPHB2	NUP188	PRDX6	RPL18A	RAB11FIP2
AREG	ATXN2L	CTNNA1	EPOP	OGDH	PRELID3B	RPL19	RAB2A
AREL1	ATXN7L3	CTNNB1	EPPK1	OSBPL8	PRKAA1	RPL27A	RBBP4
ARF1	ATXN7L3B	CTSB	ERBB2	OSGIN2	PRKACB	RPL28	RBM12
ARF3	AUP1	CUL4B	ERF	P4HB	PRKAR1A	RPL29	RC3H2
ARF4	AVL9	CUX1	ERG28	PA2G4	PRNP	RPL35	RCN1
ARF5	AZIN1	CXCL16	ERGIC1	PACSIN2	PROS1	RPL36	RCN2
ARF6	B2M	CYB5B	ERGIC3	PAPSS1	PRRC1	RPL4	RNF11
ARFGAP1	B3GALNT2	CYBRD1	ESRRA	PARP4	PSAP	RPL6	RNF141
ARFGAP2	B3GAT3	CYCS	ESYT2	PCBP4	PSAT1	RPL8	RO60
ARFGEF1	B4GALNT1	CYFIP1	ETNK1	PCMT1	PTEN	RPLP0	ROCK2
ARFGEF2	B4GALT1	CYP2U1	ETV5	PDHA1	PTGES3	RPLP1	RPRD1A
ARFIP1	B4GALT2	CYRIB	EVI5L	PDIA3	PTPN11	RPRD1A	RPS25
ARFIP2	B4GALT3	DAG1	EXOC7	PDLIM5	PUM2	RPS14	RPSA
ARHGAP1	B4GALT5	DAZAP2	EXTL3	PDLIM7	RAB11A	RPS16	RRM2B
ARHGAP12	BACE1	DBI	FAF2	PFKM	RAB6A	RPS18	RSF1
ARHGAP17	BACH1	DCAF13	FAM102A	PFN1	RAB8B	RPS19	RSL24D1
ARHGAP18	BAD	DCAF7	FAM126A	PGM1	RAD21	RPS2	RTN4
ARHGAP21	BAG3	DCBLD2	FAM168A	PIGS	RALGPS2	RPS26	SCAMP1
ARHGAP23	BAG5	DCK	FAM199X	PKM	RAN	RPS27	SCD
ARHGAP26	BAG6	DCTN4	FAM32A	PLEC	RASSF3	RPS27A	SEC23A
ARHGAP27	BAHCC1	DDOST	FAM3C	PLRG1	RASSF8	RPS3	SECISBP2L
ARHGAP29	BAHD1	DDR1	FAM83H	PNPLA6	RC3H2	RPS3A	SEL1L
ARHGAP35	BAIAP2	DDX18	FAM8A1	POLR2A	RCN1	RPS4X	SELENOF
ARHGAP4	BAIAP3	DDX21	FAM91A1	PPFIBP1	RCN2	RPS6	SELENOI
ARHGAP42	BAK1	DDX3X	FAT1	PPP2R1A	RDX	RPS9	SEPTIN2
ARHGAP45	BANF1	DDX42	FAU	PRCP	REEP5	RPSA	SERINC1
ARHGAP5	BAP1	DDX52	FBXO2	PRDX4	RFK	RRBP1	SESN3
ARHGDIA	BAX	DDX6	FBXO7	PRKAR1A	RHOA	RSF1	SET
ARHGEF1	BAZ1B	DEK	FBXW11	PRKCSH	RNF11	RTN4	SETD7
ARHGEF10L	BAZ2A	DERL1	FGFRL1	PRKDC	RNF138	S100A14	SHC1
ARHGEF11	BCAP31	DESI2	FKBP1A	PRMT5	RNF141	SAE1	SINHCAF
ARHGEF12	BCAR1	DHFR	FKBP9	PRPF8	RO60	SAMD9	SKA2
ARHGEF16	BCAS2	DHX15	FLII	PRR14L	RPL15	SCD	SKAP2
ARHGEF17	BCL2L1	DHX40	FLNA	PRRC2A	RPL5	SCOC	SLC30A1
ARHGEF18	BCL2L12	DHX9	FLNC	PRRC2C	RPRD1A	SCP2	SLC39A10
ARHGEF19	BCL2L13	DICER1	FLOT2	PSMB4	RPSA	SDC4	SLC39A6
ARHGEF2	BCL2L2	DIP2B	FOXK2	PSMC4	RRM2B	SEC16A	SLC4A7
ARHGEF35	BCL7A	DIS3	FSTL1	PSMD1	RSF1	SEC23A	SMAD5
ARHGEF37	BCL7B	DKK1	FSTL3	PSMD8	RSL24D1	SEL1L3	SMIM13
ARHGEF4	BCL9	DLD	FTH1	PTPN11	RTN4	SELENOF	SOCS4
ARHGEF5	BCL9L	DNAJA1	FUBP3	PTTG1IP	RYBP	SERINC3	SOX4
ARHGEF7	BCLAF1	DNAJB14	FURIN	PUM2	SCAMP1	SET	SP1
ARID1A	BCORL1	DNAJC3	G3BP2	QSOX1	SCD	SGTA	SPAG9
ARID1B	BCR	DNAJC8	GAA	RAB14	SCOC	SIL1	SPCS3
ARID2	BECN1	DPY19L1	GALE	RAB1B	SCP2	SLC16A1	SPOPL
ARID4B	BET1L	DPY19L4	GALNT1	RAB5C	SCRN1	SLC1A5	SPRED1
ARIH1	BEX2	DPYSL3	GALNT10	RANBP2	SDCBP	SLC25A4	SREBF2
ARIH2	BHLHA15	DR1	GALNT2	RARS1	SEC11A	SLC25A6	SRP9
ARL1	BICD2	DSG2	GANAB	RBFOX2	SELENOF	SLC41A1	ST13
ARL15	BIN3	DSP	GAPDH	RBM12	SELENOT	SLC4A2	STARD4
ARL5A	BIRC2	DST	GAPVD1	RDX	SEPTIN10	SLC7A5	STMN1
ARL5B	BIRC6	DSTN	GDA	RECQL	SEPTIN11	SLU7	STT3B
ARL6IP1	BLCAP	DTX3L	GDI1	REPS1	SEPTIN2	SMARCA1	SYNCRIP
ARL6IP5	BLOC1S6	DYNC1LI2	GID8	RHOA	SERBP1	SMARCC1	SYPL1
ARL8B	BLVRB	DYNLT3	GLUL	RHOC	SERINC1	SMARCD1	TAOK1
ARMC10	BMI1	EAF1	GNA11	RIOK3	SERINC3	SMARCD2	TARDBP
ARMC7	BMP2K	ECT2	GNA12	RNF103	SERP1	SMG8	TBL1XR1
ARMCX3	BMP8B	EEF1A1	GNAI2	RPL10	SESN3	SNRNP200	TCEA1
ARMH3	BMPR2	EFCAB14	GNB1	RPL11	SET	SNRNP70	TENT4B
ARMT1	BNIP1	EFR3A	GNG12	RPL13	SETD7	SON	TFRC
ARNT	BNIP3L	EID1	GNG7	RPL13A	SGPP1	SP110	TMED10
ARNTL	BOK	EIF1AX	GNPTAB	RPL15	SINHCAF	SRP14	TMED5
ARPC1A	BOP1	EIF2AK1	GNS	RPL18	SKA2	SRRM2	TMED7
ARPC2	BPNT2	EIF2S1	GOLM1	RPL18A	SLC16A1	ST13	TMEM123
ARPC3	BRAF	EIF2S3	GOLM2	RPL19	SLC25A36	STAT1	TMEM167A
ARPC4	BRAT1	EIF3A	GPAA1	RPL21	SLC25A46	STUB1	TMEM181
ARPC5	BRD2	EIF3E	GPATCH8	RPL23A	SLC38A1	TAF15	TMEM230
ARPC5L	BRD3	EIF3L	GPD2	RPL27	SLC39A10	TAOK2	TMEM30A
ARPP19	BRD4	EIF4A2	GPI	RPL27A	SLC39A6	TAX1BP1	TMEM33
ARRB1	BRK1	EIF4B	GPR107	RPL28	SNX3	TIMP1	TMEM65
ARRB2	BRMS1	EIF4E	GPRC5A	RPL29	SPRED1	TJP1	TMSB10
ARRDC1	BRPF3	EIF4EBP2	GPX1	RPL3	SPTSSA	TKT	TNFRSF10B
ARVCF	BRWD3	EIF4G2	GRB2	RPL32	SRP14	TLN1	TNKS2
ASAP1	BSDC1	EIF4H	GRINA	RPL35	SRP9	TM9SF3	TNPO1
ASAP2	BSG	EIF5A	GRK2	RPL36	SRSF1	TM9SF4	TOMM20
ASB1	BTBD1	ELAVL1	GSE1	RPL37	SS18	TNKS1BP1	TOMM70
ASB7	BTBD3	ELF1	GSK3B	RPL38	SSR1	TOMM20	TOP1
ASCC2	BTBD7	ELK3	GTF3C1	RPL39	ST13	TPD52L2	TP53INP1
ASCC3	BTBD9	ELMOD2	GUCD1	RPL4	STARD7	TPR	TPD52
ASH1L	BTF3L4	ELOC	GUK1	RPL6	STMN1	TPT1	TRAM1
ASH2L	BTG2	ELOVL5	H1-0	RPL7	STT3B	TRIM25	TRIM23
ASMTL	BTRC	ELOVL6	H2BC12	RPL8	STX12	TRIP12	TWF1
ASPH	BZW1	EMB	H3-3B	RPLP0	SYNCRIP	TTC17	TWSG1
ASPHD1	C10orf88	EMC10	HACD3	RPLP1	SYPL1	TUBB4B	TXNRD1
ASRGL1	C11orf58	EMP1	HADHB	RPLP2	TAOK1	TUFM	UBE2K
ASXL1	C11orf95	ENAH	HCFC1	RPS11	TBL1XR1	U2AF2	UBE2W
ASXL2	C14orf119	ENOPH1	HDAC1	RPS14	TCEA1	UBA1	UHMK1
ATAD1	C15orf39	ENPP4	HDGF	RPS15	TGFBR1	UBA52	USO1
ATAD2	C16orf72	EPAS1	HELZ2	RPS16	TIMP2	UBAP2L	USP12
ATAD3A	C18orf25	EPCAM	HES6	RPS18	TMBIM6	UBE2B	USP46
ATE1	C19orf25	EPM2AIP1	HIBADH	RPS19	TMED10	UBE2D2	VBP1
ATF2	C19orf47	EPRS1	HINT1	RPS2	TMED5	UBE2Z	WDR36
ATF4	C1GALT1	ERBIN	HIPK1	RPS23	TMED7	UBQLN1	WWTR1
ATF5	C1orf115	EREG	HIPK2	RPS26	TMEM123	USP11	XIAP
ATF6	C1orf198	ERG28	HLA-A	RPS27	TMEM167A	USP22	YAP1
ATF6B	C1orf216	ERH	HLA-C	RPS27A	TMEM263	VCL	YES1
ATF7	C1orf43	ERI1	HMGA1	RPS29	TMEM30A	VDAC1	YOD1
ATF7IP	C22orf39	ERMP1	HMGCR	RPS3	TMEM50A	VDAC2	YWHAQ
ATG12	C4orf3	ERO1A	HNRNPA0	RPS3A	TMEM64	VPS4B	YWHAZ
ATG13	C5orf24	ERRFI1	HNRNPA1	RPS4X	TMEM65	VPS72	ZBTB10
ATG2A	C5orf51	ETF1	HSBP1	RPS5	TMSB10	WDR41	ZBTB21
ATG4A	C6orf62	ETNK1	HSPA8	RPS6	TMX1	WDR45B	ZC3H12C
ATG4B	C6orf89	EWSR1	HSPA9	RPS8	TNKS2	WDR6	ZDHHC20
ATG4D	C8orf82	EXOC5	HUWE1	RPS9	TNPO1	XRN2	ZNF146
ATG9A	CAB39	EZR	HYAL2	RPSA	TOMM20	YBX1	ZNF148
ATIC	CACNA1H	F2R	HYOU1	RPTOR	TPD52	YME1L1	ZNF518B
ATL3	CACUL1	F2RL1	IGF2R	RRBP1	TPI1	YTHDF2	ZNF680
ATMIN	CAD	F3	IL6ST	S100A14	TPM3	YWHAZ	ZNF770
ATN1	CALCOCO2	FADS1	ILF3	SAE1	TPP1	ZC3H13	ZYG11B
ATP10D	CALD1	FAM102B	ILRUN	SAMD9	TRAF4	ZFR
ATP11A	CALM1	FAM120A	IMPDH2	SARS1	TRAM1	ZFYVE16
ATP11B	CALM3	FAM122B	INTS5	SCAF11	TRIM33	ZNF638
ATP13A1	CALR	FAM160B1	IP6K1	SCD	TSPAN3	ZYX
ATP13A2	CALU	FAM168B	IPO7	SCOC	TWF1
ATP13A3	CAMK1	FAM169A	IRF6	SCP2	TXNRD1
ATP1A1	CAMK2G	FAM199X	ISG15	SCRN1	UBB
ATP1B3	CAMK2N1	FAM217B	ITGA3	SDC4	UBE2K
ATP2A2	CAMKK2	FAM241A	ITGA5	SEC16A	UBE2W
ATP2A3	CAMSAP2	FAM3C	ITGB1	SEC23A	WDR1
ATP2B1	CAMSAP3	FAM8A1	ITM2C	SEC24C	YAP1
ATP2B4	CAMTA2	FAM91A1	ITPRID2	SEC61A1	YBX1
ATP2C1	CAND1	FAM98A	JUNB	SEL1L3	YES1
ATP5F1A	CANT1	FAM98B	JUP	SELENOF	YIPF6
ATP5F1B	CANX	FAR1	KANSL3	SERINC3	YTHDF3
ATP5F1D	CAP1	FAT1	KCTD10	SET	YWHAB
ATP5F1E	CAPG	FBXO22	KDELR1	SF3B1	YWHAG
ATP5IF1	CAPN1	FBXW11	KDM2A	SF3B2	YWHAQ
ATP5MC2	CAPN2	FDX1	KDM3B	SIL1	YWHAZ
ATP5ME	CAPN5	FEM1B	KDM4A	SLC16A1	ZFAND1
ATP5MF	CAPN6	FGD4	KDM5B	SLC1A5	ZNF664
ATP5PB	CAPRIN1	FKBP1A	KDM5C	SLC25A4	ZNF770
ATP5PD	CAPZA1	FKBP4	KEAP1	SLC25A6
ATP5PF	CAPZA2	FKBP5	KHSRP	SLC3A2
ATP6AP1	CAPZB	FKBP9	KIAA0100	SLC41A1
ATP6AP2	CASC3	FMR1	KIAA0232	SLC4A2
ATP6V0A1	CASKIN2	FNBP1L	KIAA0513	SLC7A5
ATP6V0D1	CASP2	FNDC3A	KIAA1191	SLFN5
ATP6V0E1	CASP7	FOXN2	KIF3B	SLU7
ATP6V0E2	CAST	FRMD6	KIF5B	SMARCA1
ATP6V1A	CAV1	FRS2	KLHDC3	SMARCC1
ATP6V1B2	CAV2	FRYL	KLHL36	SMARCD2
ATP6V1C1	CAVIN1	FSCN1	KLHL9	SNRNP200
ATP6V1D	CBFB	FSTL1	KMT2D	SNRNP70
ATP6V1E1	CBL	FTH1	KPNB1	SNRPB
ATP6V1H	CBX1	FUBP3	KREMEN1	SNX14
ATP7A	CBX2	FXR1	LAMP1	SNX3
ATP8B2	CBX5	FYTTD1	LAPTM4A	SON
ATP9A	CBX6	FZD6	LARP1	SORT1
ATPAF1	CBX7	G2E3	LASP1	SP110
ATR	CCAR2	G3BP1	LDB1	SPTAN1
ATRN	CCDC113	G3BP2	LGALS3BP	SPTBN1
ATRX	CCDC117	GABARAPL2	LMAN2	SREBF2
ATXN10	CCDC120	GABPA	LMBR1	SRP14
ATXN1L	CCDC134	GALNT1	LMNB2	SRRM2
ATXN2	CCDC186	GALNT7	LPGAT1	SRSF2
ATXN2L	CCDC43	GANAB	LRBA	SSRP1
ATXN7	CCDC47	GCC2	LRP10	ST13
ATXN7L3	CCDC50	GCH1	LRP5	STAT1
ATXN7L3B	CCDC6	GDA	LRRC14	STAT3
AUP1	CCDC85C	GDAP1	LRRC58	STT3B
AVL9	CCDC97	GDI1	LSM12	STUB1
AXIN1	CCM2	GFPT1	LSM4	SUN2
AXL	CCND1	GGH	LSR	SZRD1
AZIN1	CCND3	GHITM	LTBR	TAF15
B2M	CCNI	GLO1	LYPLA2	TAOK2
B3GALNT2	CCNK	GLOD4	MAF1	TAX1BP1
B3GAT3	CCNL2	GLS	MAFG	TECR
B4GALNT1	CCNT1	GLUD1	MAGEA3	THOC2
B4GALT1	CCNT2	GLUL	MAGED1	TIMP1
B4GALT2	CCNY	GMFB	MAML1	TJP1
B4GALT3	CCSAP	GNA13	MAN2A2	TKT
B4GALT5	CCSER2	GNAI1	MAP1LC3B	TLN1
BABAM1	CCT3	GNAI3	MAP3K11	TM9SF3
BACE1	CCT7	GNB1	MAP4	TM9SF4
BACH1	CCT8	GNB5	MAPK1	TMED10
BAD	CD164	GNG12	MAPKAPK2	TMEM30A
BAG1	CD276	GNPNAT1	MAPRE3	TNKS
BAG3	CD2AP	GNPTAB	MARCHF6	TP53INP2
BAG5	CD2BP2	GNS	MATR3	TPD52L2
BAG6	CD44	GOLM1	MAZ	TPT1
BAHD1	CD59	GOLM2	MBOAT7	TRA2B
BAIAP2L1	CD63	GOLPH3	MCRIP1	TRIM25
BAIAP3	CD81	GPBP1L1	MCU	TRIP12
BAK1	CD82	GPD1L	MDK	TSPAN5
BANF1	CDC25B	GPD2	MEAK7	TSPYL1
BAP1	CDC27	GPI	MED13	TTC17
BAZ1A	CDC34	GPR160	MED13L	TUBB4B
BAZ1B	CDC37	GPRC5A	MEGF8	TUFM
BAZ2A	CDC42	GRB2	METAP1	U2AF2
BAZ2B	CDC42BPB	GRN	MFAP1	UBA1
BBX	CDC42EP1	GRPEL2	MGAT4B	UBA52
BCAM	CDC42EP4	GRSF1	MGAT5	UBE2B
BCAP31	CDC42SE1	GSK3B	MIDN	UBE2Z
BCAR1	CDC42SE2	GSPT1	MKNK2	UBQLN1
BCAS2	CDCP1	GSR	MKRN1	UBR4
BCCIP	CDH1	H1-0	MLEC	USP11
BCL2L1	CDIP1	H2AZ2	MLF2	UTP3
BCL2L12	CDK12	H3-3B	MLLT1	UTP4
BCL2L13	CDK13	HACD2	MLLT6	VARS1
BCL2L2	CDK16	HACD3	MLX	VCL
BCL7C	CDK18	HADHA	MLXIP	VDAC1
BCL9L	CDK19	HADHB	MMP15	VDAC2
BCLAF1	CDK2	HIBADH	MOB1A	VPS18
BCORL1	CDK2AP1	HIF1A	MRFAP1	VPS4A
BCR	CDK2AP2	HIGD1A	MSMO1	VPS4B
BDP1	CDK6	HINT3	MSN	VPS72
BECN1	CDK8	HIPK1	MTPN	WBP11
BEND7	CDKN1A	HIPK3	MVD	WBP2
BET1L	CDKN1B	HLA-A	MYDGF	WDR45B
BEX2	CDKN2A	HLA-B	MYH9	WDR6
BFAR	CDR2L	HLA-C	MYL9	XBP1
BICD2	CDV3	HLA-E	MYO1D	XRN2
BICDL1	CEBPG	HLTF	MYRF	YBX1
BIN1	CELF1	HMGA2	NAA50	YIPF6
BIN3	CELSR2	HMGB1	NACC1	YTHDF2
BIRC2	CELSR3	HMGB3	NBL1	YWHAZ
BIRC5	CEMIP2	HMGCR	NBR1	ZC3H13
BIRC6	CENPB	HMGCS1	NCL	ZFR
BLMH	CENPO	HMGN1	NCOA4	ZFYVE16
BLOC1S6	CENPX	HMGN3	NDFIP2	ZNF197
BLVRA	CEP170B	HMGN4	NDRG1	ZNF638
BLVRB	CEP20	HNRNPA0	NDUFAB1	ZNFX1
BMI1	CERCAM	HNRNPA1	NDUFB2
BMP1	CERK	HNRNPA2B1	NDUFV1
BMP2K	CERS2	HNRNPA3	NECTIN1
BMPR2	CERS4	HNRNPAB	NF2
BMS1	CERS5	HNRNPC	NFAT5
BNIP2	CERS6	HNRNPDL	NFE2L1
BNIP3L	CES2	HNRNPF	NFKB2
BOD1	CFL1	HNRNPH1	NGFR
BOD1L1	CFL2	HNRNPH2	NIBAN2
BOK	CGGBP1	HNRNPH3	NIPSNAP1
BOP1	CHAMP1	HNRNPK	NLGN2
BPNT2	CHCHD10	HNRNPR	NMD3
BPTF	CHCHD2	HNRNPU	NMT1
BRAF	CHCHD3	HP1BP3	NONO
BRAP	CHCHD7	HPRT1	NOP53
BRAT1	CHD2	HS2ST1	NOTCH2
BRD1	CHERP	HS6ST2	NOTCH3
BRD2	CHM	HSBP1	NPEPPS
BRD3	CHMP1A	HSD17B12	NPTN
BRD4	CHMP2A	HSD17B4	NSD1
BRD7	CHMP2B	HSDL1	NSF
BRD8	CHMP3	HSP90AA1	NSMF
BRD9	CHMP4B	HSP90AB1	NUCB1
BRI3BP	CHP1	HSP90B1	NUCKS1
BRK1	CHPF	HSPA13	NUDT16L1
BRMS1	CHPF2	HSPA8	NUP188
BROX	CHRAC1	HSPA9	NXN
BRPF3	CHST3	IARS1	OAZ2
BRWD1	CIAO2B	IDH1	OGFR
BRWD3	CIAPIN1	IDH3A	ORMDL3
BSDC1	CIC	IDI1	OS9
BSG	CIPC	IGF2BP3	OSBPL8
BSPRY	CIRBP	IGFBP2	OSGIN2
BTAF1	CISD2	ILF3	P4HB
BTBD1	CIZ1	IMPA1	PABPC1
BTBD2	CKAP4	INSIG1	PACSIN2
BTBD3	CKB	INTS2	PAFAH1B2
BTBD6	CLCN3	IPMK	PAK2
BTBD7	CLCN7	IPO5	PALLD
BTF3L4	CLDN4	IPO7	PAM
BTG1	CLDND1	IQGAP1	PAPOLA
BTG3	CLEC16A	ISCA1	PARM1
BTRC	CLIC1	ISOC1	PATL1
BUB1	CLIC4	ITGA2	PCBP4
BZW1	CLINT1	ITGA3	PCNX3
BZW2	CLIP2	ITGA6	PDE4A
C11orf58	CLIP4	ITGB1	PDIA3
C14orf119	CLOCK	ITM2B	PDLIM5
C15orf39	CLPTM1L	ITM2C	PDLIM7
C16orf72	CLSTN1	ITPRID2	PDXK
C18orf25	CLTA	IVNS1ABP	PEA15
C19orf25	CLTB	JMY	PEDS1
C19orf53	CLTC	JPT1	PERP
C1orf115	CLU	KBTBD11	PEX19
C1orf122	CLUH	KBTBD8	PFDN1
C1orf198	CMPK1	KCTD9	PFN1
C1orf216	CMTM4	KDELR2	PGAP6
C1orf43	CMTM6	KDM1B	PGM1
C1QBP	CNBP	KDM7A	PGM2
C21orf91	CNDP2	KHDRBS1	PHC2
C2CD2	CNIH1	KIAA1191	PHF8
C2CD2L	CNKSR1	KIF3A	PIAS4
C2CD3	CNN2	KIF5B	PICALM
C4orf3	CNN3	KITLG	PIGS
C5orf15	CNNM2	KLF3	PIP4K2B
C5orf22	CNNM4	KLF6	PIP5K1A
C5orf24	CNOT1	KLHL15	PIP5K1C
C5orf51	CNOT10	KLHL28	PITPNB
C6orf62	CNOT3	KMT5A	PJA2
C6orf89	CNOT4	KPNA1	PLD3
C8orf33	CNOT6	KPNA2	PLEKHB2
C8orf82	CNOT6L	KPNA3	PLEKHM2
C9orf16	CNOT8	KRAS	PLOD1
C9orf78	CNOT9	KRR1	PLPPR2
CA11	CNP	LAMC1	PLXNA1
CA13	CNST	LAMP1	PLXNB2
CAAP1	CNTROB	LAMP2	PNPLA2
CAB39	COA1	LAMP3	POLR2C
CABIN1	COA4	LANCL1	POLR2E
CACNA1H	COA6	LAPTM4A	POMGNT1
CACNA2D2	COASY	LAPTM4B	PPARD
CACNB3	COCH	LARP4	PPP1CA
CACTIN	COG4	LBR	PPP1CB
CACUL1	COL12A1	LCOR	PPP1R15B
CACYBP	COL6A2	LCORL	PPP1R16A
CAD	COPA	LDHA	PPP1R18
CADM4	COPB1	LEPROTL1	PPP1R9B
CALCOCO1	COPB2	LGALS8	PPP2R1A
CALCOCO2	COPG1	LIFR	PPP2R5B
CALD1	COPRS	LIMA1	PPP5C
CALM1	COPS3	LIMS1	PPP6R2
CALM3	COPS5	LIN7C	PRCP
CALR	COPZ1	LIPA	PRDX1
CALU	COQ9	LITAF	PRKACA
CAMK1	CORO1B	LIX1L	PRKAR1A
CAMK2D	CORO1C	LMAN1	PRMT1
CAMK2G	COTL1	LMBR1	PRNP
CAMKK2	COX11	LNPEP	PRPF8
CAMSAP1	COX19	LPGAT1	PRR14L
CAMSAP2	COX4I1	LRBA	PRRC1
CAMSAP3	COX7B	LRP8	PRRC2A
CAMTA2	COX7C	LRPPRC	PRRC2C
CAND1	CPD	LRRC40	PSAP
CANT1	CPE	LRRC58	PSIP1
CANX	CPEB4	LRRC59	PSMA4
CAP1	CPNE1	LRRFIP1	PSMB4
CAPG	CPNE3	LSM14A	PSMC4
CAPN1	CPSF1	LTA4H	PSMD1
CAPN15	CPSF6	LYPLA1	PSME3
CAPN2	CPSF7	M6PR	PTBP1
CAPN5	CPT2	MACROH2A1	PTBP3
CAPN6	CRABP2	MAD2L1	PTK7
CAPN7	CRAT	MAGEA3	PTMA
CAPNS1	CREB1	MAGEB2	PTMS
CAPRIN1	CREB3	MAGED1	PTP4A2
CAPZA1	CREB3L2	MAGEF1	PTPA
CAPZA2	CREBBP	MAGT1	PTPRA
CAPZB	CREBL2	MAK16	PTTG1IP
CARD10	CREBZF	MAL2	PUM2
CARHSP1	CRIP2	MAN1A1	PURB
CARM1	CRK	MAP1B	PXDN
CARMIL1	CRKL	MAP1LC3B	PXN
CARNMT1	CRTAP	MAP2K1	QSOX1
CARS1	CRTC1	MAP4	RAB14
CARS2	CRTC2	MAPK1	RAB1B
CASC3	CRTC3	MAPK1IP1L	RAB2A
CASK	CS	MAPK6	RAB35
CASKIN2	CSDE1	MAPKAPK2	RAB3B
CASP2	CSGALNACT2	MAPRE1	RAB5B
CASP7	CSK	MARCHF6	RAB5C
CAST	CSNK1A1	MARCHF7	RAC1
CASTOR2	CSNK1D	MARCKSL1	RAD21
CASZ1	CSNK1E	MAT2B	RBFOX2
CAT	CSNK1G1	MATR3	RBM47
CAV2	CSNK1G2	MBNL1	RBM8A
CAVIN1	CSNK2A1	MBNL2	RBPJ
CBFB	CSPG4	MBOAT2	RC3H2
CBL	CSRNP1	MBTD1	RCN2
CBLL1	CSRNP2	MBTPS1	RCOR1
CBWD1	CSRP1	MCFD2	RDH11
CBWD2	CST3	MCL1	RDX
CBX1	CST6	MDK	REPIN1
CBX4	CSTB	MDM2	RER1
CBX5	CSTF2T	ME1	RETREG2
CBX6	CTBP1	ME2	RETREG3
CC2D1A	CTC1	MEAF6	RHBDD2
CCAR1	CTDNEP1	MED13	RHOA
CCAR2	CTDSP1	MED28	RHOC
CCDC115	CTDSP2	MED4	RHOD
CCDC117	CTDSPL2	MESD	RMND5A
CCDC120	CTIF	MET	RNF103
CCDC124	CTNNA1	METAP1	RNF11
CCDC134	CTNNAL1	METAP2	RNF139
CCDC137	CTNNB1	METTL15	RNF141
CCDC186	CTNND1	MEX3C	RNF187
CCDC25	CTR9	MGAT4A	RNF7
CCDC43	CUEDC1	MGST1	RPL13A
CCDC47	CUL4B	MIB1	RPL15
CCDC50	CUL7	MICU2	RPL18
CCDC6	CUTA	MINDY2	RPL18A
CCDC69	CUX1	MKLN1	RPL29
CCDC85C	CXCL16	MLEC	RPL35
CCDC86	CYB561	MLF2	RPL36
CCDC88A	CYB561D1	MMGT1	RPL38
CCDC90B	CYB5B	MOB1A	RPLP1
CCDC92	CYB5R3	MOB1B	RPN2
CCDC93	CYBA	MOB4	RPRD1A
CCHCR1	CYBC1	MOCS2	RPS14
CCM2	CYFIP1	MORF4L1	RPS16
CCNC	CYHR1	MORF4L2	RPS19
CCND1	CYLD	MOSPD1	RPS2
CCND3	CYP26B1	MPC2	RPS23
CCNF	CYREN	MPP7	RPS26
CCNG1	CYSTM1	MPZL1	RPS27
CCNI	CYTH1	MPZL2	RPS27A
CCNJ	CYTH3	MRFAP1	RPS29
CCNK	DAB2IP	MRPL3	RPS3
CCNL2	DAD1	MRPL35	RPS3A
CCNT1	DAG1	MRPL42	RPS6KA4
CCNT2	DAP	MRS2	RPS9
CCNY	DAP3	MRTFB	RPSA
CCP110	DAPK3	MSH6	RPTOR
CCSAP	DARS1	MSI2	RRAGC
CCT2	DAZAP1	MSMO1	RSL24D1
CCT3	DAZAP2	MSN	RTF1
CCT4	DBI	MTAP	RTL6
CCT6A	DBN1	MTDH	RTN3
CCT7	DBNDD1	MTHFD2	RTN4
CCT8	DBNL	MTPN	RTN4RL2
CD109	DCAF10	MXRA7	S100A14
CD164	DCAF11	MYCBP	S100A16
CD276	DCAF12	MYH10	SAE1
CD2AP	DCAF5	MYL12A	SAMD4B
CD2BP2	DCAF6	MYL12B	SAT1
CD44	DCAF7	MYO1B	SBK1
CD46	DCBLD2	MYO6	SCAF1
CD59	DCP1A	MYOF	SCAMP1
CD63	DCP2	MZT1	SCAP
CD81	DCTN1	NAA20	SCD
CD82	DCTN2	NAA25	SCD5
CD99	DCTN4	NAA50	SCOC
CDAN1	DCTN5	NAB1	SCP2
CDC123	DCUN1D1	NAMPT	SCYL2
CDC14B	DCXR	NAP1L1	SDC3
CDC23	DDA1	NARS1	SDC4
CDC25B	DDAH1	NBR1	SEC23A
CDC27	DDHD2	NCBP1	SEC24C
CDC34	DDI2	NCKAP1	SEC61A1
CDC37	DDOST	NCL	SECISBP2L
CDC37L1	DDR1	NCOA4	SEL1L
CDC40	DDX17	NDC1	SEL1L3
CDC42	DDX21	NDFIP1	SELENOF
CDC42BPA	DDX3X	NDFIP2	SELENON
CDC42BPB	DDX42	NDRG1	SELENOW
CDC42BPG	DDX46	NDUFA5	SEMA4F
CDC42EP1	DDX6	NDUFB5	SEMA6B
CDC42EP4	DECR1	NEDD4	SEPTIN8
CDC42SE1	DEDD	NEK7	SERINC1
CDC42SE2	DEF8	NFE2L2	SERINC3
CDC5L	DEGS1	NHLRC2	SERINC5
CDC6	DENND11	NIPSNAP2	SERP1
CDC73	DENND1A	NMD3	SET
CDCP1	DENND4B	NOLC1	SETD7
CDH1	DENR	NPEPPS	SF1
CDH24	DESI1	NPM1	SF3A1
CDH3	DESI2	NPTN	SF3B5
CDIP1	DGAT1	NQO1	SFT2D1
CDK12	DGCR2	NR1D2	SGPL1
CDK13	DGKQ	NRAS	SGTA
CDK16	DGKZ	NSA2	SH3GL1
CDK17	DHCR24	NSD2	SH3GLB1
CDK19	DHCR7	NSD3	SHOC2
CDK2	DHRS13	NSF	SIL1
CDK2AP1	DHRS7	NT5E	SIPA1L3
CDK2AP2	DHX30	NUCKS1	SKI
CDK5RAP1	DHX32	NUDT15	SLC1A5
CDK5RAP2	DHX33	NUDT21	SLC25A23
CDK6	DIAPH1	NUDT4	SLC25A24
CDK8	DIP2B	NUFIP2	SLC25A4
CDK9	DISP2	NUP155	SLC25A6
CDKN1A	DLD	NUP43	SLC31A1
CDR2L	DLG5	NUP58	SLC35A4
CDS1	DLGAP4	NUS1	SLC39A14
CDS2	DLST	OAT	SLC39A9
CDV3	DLX4	OAZ2	SLC41A1
CDYL	DMKN	OCIAD1	SLC52A3
CEBPG	DMPK	ODC1	SLC66A2
CEBPZ	DMWD	OS9	SLC7A5
CELF1	DNAJA2	OSBPL8	SLC7A6
CELSR1	DNAJB11	OSMR	SLC9A3R1
CELSR2	DNAJB14	OSTM1	SMARCC1
CEMIP2	DNAJB6	OTUD4	SMARCD1
CENPB	DNAJC11	OXR1	SMARCD2
CENPT	DNAJC14	P4HA1	SNRPB
CENPX	DNAJC16	P4HB	SNU13
CEP170	DNAJC3	PABPC1	SNW1
CEP170B	DNAJC5	PAFAH1B1	SNX10
CEP20	DNM2	PAFAH1B2	SNX11
CEP350	DNMBP	PAG1	SNX12
CEP68	DOC2B	PAICS	SNX27
CEP78	DOCK6	PAK2	SNX3
CEP97	DOK4	PALLD	SOCS7
CERCAM	DOLPP1	PALM2AKAP2	SON
CERK	DOT1L	PAM	SORT1
CERS2	DPF2	PANK3	SPEN
CERS4	DPH2	PAPOLA	SPINT1
CERS5	DPP9	PAPSS1	SPINT2
CERS6	DPY19L1	PARP1	SQSTM1
CES2	DPYSL3	PARP4	SREBF2
CFAP36	DPYSL4	PATL1	SRF
CFAP97	DR1	PAWR	SRP14
CFL1	DRAP1	PCDH7	SRRM2
CFL2	DSE	PCGF6	SRSF2
CGGBP1	DSG2	PCMTD2	SRSF3
CGN	DSP	PCNP	SRSF9
CHAMP1	DSTN	PDCD6IP	SSR1
CHCHD1	DSTYK	PDIA3	ST13
CHCHD10	DTX2	PDIA6	ST14
CHCHD2	DUSP14	PDLIM5	STARD4
CHCHD3	DUSP16	PDP1	STAT3
CHCHD7	DUSP3	PDS5A	STAT6
CHD1	DUSP4	PEA15	STAU1
CHD2	DUSP5	PEBP1	STIP1
CHD3	DUSP7	PERP	STK25
CHD6	DUSP8	PFKM	STK35
CHD8	DVL1	PFN1	STMP1
CHERP	DVL3	PFN2	STRAP
CHKA	DYM	PGAM1	STUB1
CHM	DYNC1H1	PGK1	STX16
CHMP1A	DYNC1LI2	PGM2L1	STXBP1
CHMP2A	DYNLL2	PGRMC1	SUMO2
CHMP2B	E2F3	PGRMC2	SUN2
CHMP3	E2F4	PHF20	SUPT5H
CHMP4B	EAF1	PHF6	SUPT6H
CHMP7	EBP	PHIP	SURF4
CHORDC1	ECE1	PHLDA1	SUZ12
CHP1	EDC3	PHLDB2	SYNGR2
CHPF	EDC4	PHTF2	SYPL1
CHPF2	EDEM3	PI4K2B	SZRD1
CHRNB1	EEA1	PICALM	TACC1
CHST15	EEF1A1	PIK3C2A	TADA3
CHST3	EEF1A2	PITPNB	TAOK1
CHSY1	EEF1D	PJA2	TAX1BP1
CHUK	EEF2	PKM	TBC1D10B
CIAO1	EFCAB14	PKN2	TBC1D14
CIAO2A	EFHD2	PLEKHA1	TBC1D20
CIAO2B	EFR3A	PLEKHB2	TBC1D9B
CIAPIN1	EGR1	PLOD2	TGFB1
CIB1	EGR3	PLP2	TGM2
CIC	EHBP1L1	PLS1	TIMP1
CILP2	EHD1	PLS3	TIMP2
CIRBP	EHD2	PMP22	TLCD3A
CISD2	EIF1	PMS1	TLE5
CIZ1	EIF1AX	PNRC2	TLN1
CKAP4	EIF2AK1	POLR2A	TM9SF3
CKAP5	EIF2S1	POLR2K	TM9SF4
CKB	EIF2S3	POLR3G	TMBIM1
CLASP1	EIF3A	PON2	TMBIM6
CLCN3	EIF3D	POU2F1	TMCO1
CLCN5	EIF3F	PPA1	TMED10
CLCN7	EIF3I	PPAT	TMED9
CLDN7	EIF3K	PPFIBP1	TMEM123
CLDND1	EIF3L	PPIG	TMEM167A
CLEC16A	EIF3M	PPM1A	TMEM179B
CLIC1	EIF4A2	PPME1	TMEM184B
CLIC3	EIF4B	PPP1CB	TMEM245
CLIC4	EIF4E2	PPP1CC	TMEM263
CLINT1	EIF4EBP2	PPP1R12A	TMEM30A
CLIP1	EIF4ENIF1	PPP1R15B	TMEM64
CLIP2	EIF4G1	PPP1R2	TMEM94
CLIP4	EIF4G2	PPP2CA	TMEM9B
CLN8	EIF4H	PPP2CB	TNFAIP1
CLNS1A	EIF5	PPP2R1B	TNFRSF12A
CLOCK	EIF5A	PPP2R2A	TNKS1BP1
CLPB	EIF6	PPP2R3A	TNKS2
CLPTM1	ELAVL1	PPP2R5C	TNRC18
CLPTM1L	ELF4	PPP3CA	TOMM34
CLPX	ELK1	PPP3R1	TOR1AIP1
CLSTN1	ELK3	PPP4R2	TOR4A
CLSTN3	ELK4	PPP6R3	TP53I11
CLTA	ELL	PPTC7	TP53INP1
CLTB	ELL2	PRCP	TP53INP2
CLTC	ELOA	PRDX1	TPD52L2
CLU	ELOC	PRDX3	TPI1
CLUH	ELOVL1	PRDX6	TPM3
CMAS	ELOVL7	PRELID3B	TPT1
CMPK1	ELP2	PREPL	TRAF3
CMTM3	EMC10	PRKAA1	TRAF4
CMTM4	EMD	PRKACB	TRIB3
CMTM6	ENAH	PRKAR1A	TRIM25
CMTR1	ENDOD1	PRKAR2B	TRIM44
CNBP	ENO1	PRKDC	TRNP1
CNDP2	ENPP4	PRNP	TSPAN17
CNIH1	ENSA	PROS1	TSPAN5
CNKSR1	ENTPD4	PRPF40A	TSPAN7
CNN2	ENTPD7	PRPF4B	TSPYL1
CNN3	EP300	PRPS2	TTLL12
CNNM3	EP400	PRRC1	TTYH3
CNNM4	EPAS1	PSAP	TUBB4B
CNOT1	EPB41	PSAT1	TUFM
CNOT10	EPB41L2	PSIP1	TVP23B
CNOT4	EPCAM	PSMD1	TXN2
CNOT6	EPHA2	PSMD10	UBA52
CNOT6L	EPN2	PTBP1	UBA6
CNOT7	EPOP	PTBP3	UBE2A
CNOT8	EPPK1	PTGES3	UBE2B
CNOT9	EPS8L1	PTGFRN	UBE2D2
CNP	EPS8L2	PTMA	UBE2E3
CNPY3	ERBB2	PTPN1	UBE2Q1
CNST	ERBIN	PTPN11	UBE2W
CNTROB	ERC1	PTTG1IP	UBE2Z
COA1	EREG	PUM2	UBE3C
COASY	ERF	PXN	UBFD1
COBL	ERG28	QKI	UBQLN1
COCH	ERGIC1	QSER1	UBR3
COG4	ERGIC3	RAB10	UBR7
COG6	ERI3	RAB11A	UHMK1
COIL	ERLIN2	RAB11FIP2	USP12
COL12A1	ERMP1	RAB14	USP22
COL18A1	ERN1	RAB18	VASP
COL1A1	ERP29	RAB1A	VBP1
COL4A5	ERP44	RAB21	VCL
COL6A1	ESPN	RAB2A	VDAC1
COL6A2	ESRRA	RAB31	VDAC2
COLGALT1	ESYT1	RAB5A	VGLL4
COMMD8	ETF1	RAB5C	VOPP1
COMMD9	ETNK1	RAB6A	VPS26A
COP1	ETV4	RAB7A	VPS37B
COPA	ETV5	RAB8B	VPS4A
COPB1	EVI5L	RAC1	WBP1L
COPB2	EVPL	RAD21	WBP2
COPE	EWSR1	RAD23B	WDR26
COPG1	EXOC7	RAN	WDR45B
COPG2	EXTL3	RANBP2	WDR82
COPRS	F11R	RANBP9	WDTC1
COPS2	FAAP20	RAP1A	YAP1
COPS3	FADS1	RAP1B	YIPF6
COPS4	FAF1	RASSF3	YKT6
COPS5	FAF2	RB1	YTHDF1
COPS8	FAM102A	RBAK	YWHAG
COPZ1	FAM104A	RBBP4	YWHAQ
COQ5	FAM107B	RBBP7	YWHAZ
COQ9	FAM110A	RBFOX2	ZBTB4
CORO1B	FAM110C	RBM12	ZC3H15
CORO1C	FAM117A	RBM12B	ZCCHC14
CORO2A	FAM120A	RBM27	ZFAND3
COTL1	FAM120AOS	RBM3	ZFAND5
COX11	FAM120B	RBM8A	ZFR
COX15	FAM126A	RC3H1	ZNF185
COX4I1	FAM131A	RC3H2	ZNF207
COX6A1	FAM136A	RCN1	ZNF316
COX7A2L	FAM160A1	RCN2	ZNF385A
COX7C	FAM160A2	RDH11	ZNF609
CPD	FAM160B1	RDX	ZNF664
CPE	FAM160B2	REEP5	ZYX
CPEB4	FAM168A	RESF1
CPNE1	FAM168B	REST
CPNE2	FAM171A2	RFK
CPNE3	FAM189B	RHOA
CPOX	FAM199X	RHOBTB3
CPS1	FAM214B	RHOQ
CPSF1	FAM219A	RIF1
CPSF2	FAM219B	RIOK3
CPSF3	FAM222B	RNF11
CPSF6	FAM234A	RNF138
CPSF7	FAM32A	RNF141
CPT1A	FAM3C	RNF6
CPT2	FAM53B	RNGTT
CRABP2	FAM53C	RNMT
CRACD	FAM71E1	RO60
CRAT	FAM83G	RPE
CREB1	FAM83H	RPL15
CREB3	FAM8A1	RPL22
CREB3L2	FAM91A1	RPL23
CREBBP	FARP1	RPL23A
CREBL2	FARP2	RPL27
CREBZF	FARSA	RPL31
CREG1	FASN	RPL35A
CRELD2	FAT1	RPL36
CRIM1	FAU	RPL38
CRIP2	FBL	RPL41
CRK	FBRS	RPL5
CRKL	FBXL16	RPL7
CRLF1	FBXL19	RPL7A
CRNKL1	FBXO11	RPL9
CRTAP	FBXO2	RPLP1
CRTC3	FBXO28	RPN2
CRYBG3	FBXO31	RPRD1A
CRYZ	FBXO34	RPS12
CS	FBXO41	RPS16
CSDE1	FBXO42	RPS20
CSE1L	FBXO7	RPS23
CSGALNACT2	FBXO9	RPS24
CSK	FBXW11	RPS25
CSNK1A1	FBXW5	RPS27A
CSNK1D	FDFT1	RPS29
CSNK1E	FEM1A	RPS6
CSNK1G1	FER	RPS6KA3
CSNK1G2	FGFR4	RPSA
CSNK1G3	FGFRL1	RRM2B
CSNK2A1	FH	RRN3
CSNK2A2	FHL2	RSBN1
CSPG4	FHL3	RSF1
CSRNP1	FKBP1A	RSL24D1
CSRNP2	FKBP4	RSRC1
CSRP1	FKBP5	RTN3
CSRP2	FKBP8	RTN4
CST3	FKBP9	RYK
CST6	FLII	SACM1L
CSTB	FLNA	SACS
CSTF2T	FLNB	SAMHD1
CSTF3	FLNC	SAP18
CTBP1	FLOT2	SAR1A
CTBP2	FLYWCH1	SARAF
CTBS	FNBP1L	SAT1
CTC1	FNDC3A	SBDS
CTCF	FNIP1	SC5D
CTDNEP1	FOSL1	SCAF11
CTDP1	FOSL2	SCAMP1
CTDSP1	FOXJ2	SCARB2
CTDSP2	FOXJ3	SCD
CTDSPL2	FOXK1	SCD5
CTIF	FOXK2	SCOC
CTNNA1	FOXN2	SCP2
CTNNAL1	FOXN3	SCRN1
CTNNB1	FOXO3	SDC4
CTNNBL1	FOXO4	SDCBP
CTNND1	FOXP4	SDHC
CTR9	FPGS	SEC11A
CTSA	FRMD8	SEC23A
CTSB	FRYL	SEC23IP
CTSD	FSCN1	SEC62
CTSL	FSTL1	SECISBP2L
CTSZ	FSTL3	SEH1L
CTTN	FTH1	SEL1L
CTTNBP2NL	FTL	SEL1L3
CTU2	FUBP3	SELENOF
CTXN1	FURIN	SELENON
CUEDC1	FUS	SELENOT
CUEDC2	FUT1	SEMA3C
CUL1	FXR2	SEPHS1
CUL2	FXYD5	SEPTIN11
CUL3	FYCO1	SEPTIN2
CUL4A	FYTTD1	SEPTIN7
CUL4B	FZD1	SERBP1
CUL5	FZD5	SERINC1
CUL7	FZD6	SERINC3
CUTA	FZR1	SERP1
CUX1	G3BP1	SERPINE2
CWC22	G3BP2	SESN3
CXXC1	G6PD	SET
CYB561	GAA	SETD7
CYB5B	GABARAPL1	SF3B1
CYB5R1	GABARAPL2	SF3B3
CYB5R3	GALE	SFXN1
CYBA	GALNT1	SGPL1
CYBC1	GALNT10	SGPP1
CYFIP1	GALNT2	SH3BGRL
CYFIP2	GAN	SH3GLB1
CYHR1	GANAB	SHC1
CYLD	GAPDH	SHTN1
CYP26B1	GAPVD1	SINHCAF
CYREN	GAREM2	SKA2
CYRIB	GARRE1	SKAP2
CYTH1	GARS1	SKP1
CYTH2	GART	SLBP
CYTH3	GATAD2A	SLC16A1
DAB2IP	GATAD2B	SLC17A5
DAG1	GBA2	SLC25A24
DAP	GBE1	SLC25A36
DAP3	GBF1	SLC2A1
DAPK3	GCH1	SLC30A7
DARS1	GCN1	SLC30A9
DARS2	GDA	SLC38A1
DAXX	GDI1	SLC38A2
DAZAP1	GDPD5	SLC39A10
DAZAP2	GET3	SLC39A14
DBN1	GFER	SLC39A6
DBNDD1	GGA3	SLC39A8
DBNL	GGCX	SLC39A9
DBR1	GHITM	SLC44A1
DBT	GID8	SLC4A7
DCAF1	GIGYF1	SLC5A3
DCAF10	GIGYF2	SLC9A3R1
DCAF11	GIPC1	SLU7
DCAF12	GIT2	SMAD3
DCAF15	GLCE	SMARCA1
DCAF5	GLG1	SMARCA5
DCAF6	GLIS2	SMARCC1
DCAF7	GLO1	SMARCD2
DCAF8	GLS	SMC1A
DCBLD1	GLTP	SMC4
DCBLD2	GLUL	SMIM14
DCP1A	GLYR1	SMIM15
DCP2	GMCL1	SMURF2
DCTD	GMEB2	SNAP23
DCTN1	GMFB	SNRK
DCTN2	GMIP	SNRPD1
DCTN3	GMPPA	SNU13
DCTN4	GNA11	SNX1
DCTN5	GNA12	SNX10
DCUN1D1	GNA13	SNX3
DCUN1D3	GNAI1	SNX6
DCUN1D5	GNAI2	SOAT1
DCXR	GNAI3	SOCS6
DDA1	GNAQ	SOD1
DDAH1	GNAS	SOD2
DDB1	GNB1	SON
DDHD1	GNB2	SORD
DDHD2	GNG12	SORL1
DDI2	GNG7	SOX4
DDOST	GNL1	SP1
DDR1	GNPDA1	SP3
DDX1	GNPTAB	SP4
DDX10	GNS	SPCS2
DDX17	GOLGA3	SPCS3
DDX18	GOLGB1	SPIN1
DDX19A	GOLM1	SPINT2
DDX21	GOLM2	SPOCK1
DDX23	GOLPH3	SPOPL
DDX24	GOLPH3L	SPRED1
DDX27	GOPC	SPRING1
DDX39A	GORASP1	SPTLC1
DDX3X	GORASP2	SPTSSA
DDX41	GOSR1	SPTY2D1
DDX42	GOSR2	SREBF2
DDX46	GPAA1	SREK1
DDX5	GPAT4	SREK1IP1
DDX50	GPATCH2L	SRP14
DDX54	GPATCH8	SRP72
DDX56	GPBP1	SRP9
DDX6	GPBP1L1	SRSF1
DECR1	GPC1	SRSF10
DEDD	GPC4	SRSF2
DEF6	GPD1L	SRSF7
DEF8	GPD2	SSR1
DEGS1	GPI	SSR3
DENND11	GPR107	SSX2IP
DENND4B	GPR137B	ST13
DENND4C	GPR153	STARD4
DENND5A	GPRC5A	STARD7
DENR	GPRIN1	STAT1
DERL1	GPSM1	STAU1
DESI1	GPX1	STK24
DESI2	GRAMD1A	STK38L
DGAT1	GRB2	STK39
DGCR2	GRHPR	STMN1
DGKD	GRINA	STMP1
DGKQ	GRK2	STRBP
DGKZ	GRK6	STT3B
DGLUCY	GRPEL2	STX12
DHCR24	GRSF1	STYX
DHCR7	GSE1	SUB1
DHRS13	GSK3B	SUCLG2
DHRS7	GSN	SUMO1
DHTKD1	GSTO2	SUMO2
DHX15	GSTP1	SUN1
DHX16	GTF2A1	SUPT16H
DHX29	GTF2E2	SUZ12
DHX30	GTF2I	SVIP
DHX33	GTF2IRD1	SYAP1
DHX36	GTF3C1	SYNCRIP
DHX37	GTPBP1	SYPL1
DHX38	GTPBP2	SYT1
DHX40	GUCD1	SZRD1
DHX57	GYS1	TAF15
DHX8	H1-0	TAF2
DHX9	H1-10	TAF7
DIAPH1	H2BC12	TAF9B
DICER1	H3-3B	TAGLN2
DIP2A	H6PD	TAOK1
DIP2B	HACD2	TARDBP
DIP2C	HACD3	TAX1BP1
DIS3	HADHA	TBC1D5
DKK1	HADHB	TBL1XR1
DLAT	HAGH	TCEA1
DLD	HAX1	TCEAL8
DLG1	HBEGF	TCEAL9
DLG3	HCFC1	TCF7L2
DLG5	HDAC1	TEAD1
DLGAP4	HDAC2	TENT4B
DLST	HDAC3	TERF2IP
DLX4	HDAC5	TES
DMAC2	HDGF	TFAM
DMAP1	HDGFL2	TFDP1
DMKN	HDHD3	TFG
DMPK	HDLBP	TFPI
DMTN	HEATR6	TFRC
DMWD	HELZ	THOC2
DMXL1	HELZ2	THRAP3
DNAAF5	HERC2	THSD4
DNAJA1	HES4	TIMM17A
DNAJA2	HES6	TIMP2
DNAJA3	HEXIM1	TKT
DNAJA4	HEYL	TLCD4
DNAJB1	HGH1	TM2D1
DNAJB11	HGS	TM9SF2
DNAJB14	HIBADH	TM9SF3
DNAJB2	HIC2	TMBIM1
DNAJC1	HID1	TMBIM6
DNAJC10	HIF1A	TMCO1
DNAJC11	HIF1AN	TMED10
DNAJC13	HINT1	TMED2
DNAJC14	HINT3	TMED5
DNAJC16	HIP1	TMED7
DNAJC3	HIPK1	TMED8
DNAJC5	HIPK2	TMEM106B
DNAJC6	HK2	TMEM123
DNAJC7	HLA-A	TMEM135
DNAJC8	HLA-C	TMEM167A
DNAJC9	HM13	TMEM168
DNASE1L1	HMG20A	TMEM181
DNM1L	HMGA1	TMEM200A
DNM2	HMGCL	TMEM230
DNMBP	HMGCR	TMEM263
DNMT1	HMGCS1	TMEM30A
DNMT3A	HMGN1	TMEM33
DNPEP	HMGN4	TMEM41B
DNTTIP2	HNRNPA0	TMEM50A
DOC2B	HNRNPA1	TMEM59
DOCK1	HNRNPA3	TMEM64
DOCK5	HNRNPC	TMEM65
DOCK6	HNRNPF	TMEM97
DOCK7	HNRNPK	TMEM9B
DOCK9	HNRNPU	TMOD3
DOK1	HNRNPUL1	TMPO
DOK4	HNRNPUL2	TMSB10
DONSON	HOOK1	TMSB4X
DOT1L	HOXB9	TMX1
DPCD	HP1BP3	TNFRSF10D
DPEP1	HPCAL4	TNFRSF21
DPF2	HPS1	TNKS
DPH2	HPS4	TNKS2
DPP3	HPS5	TNPO1
DPP7	HS2ST1	TOMM20
DPP8	HS6ST1	TOMM70
DPP9	HSBP1	TOP1
DPY19L1	HSD17B10	TOR1AIP1
DPY19L4	HSD17B4	TOR1AIP2
DPYSL3	HSDL1	TPD52
DR1	HSF1	TPD52L2
DRAP1	HSP90AA1	TPI1
DSC2	HSP90AB1	TPM3
DSE	HSP90B1	TPM4
DSG2	HSPA4	TPMT
DSP	HSPA5	TPP1
DST	HSPA8	TPT1
DSTN	HSPA9	TPX2
DSTYK	HSPB1	TRA2B
DTX3L	HSPB11	TRAM1
DUS1L	HSPBP1	TRAPPC11
DUSP11	HSPH1	TRAPPC6B
DUSP14	HTATIP2	TRIB1
DUSP16	HUWE1	TRIM2
DUSP3	HYOU1	TRIM33
DUSP4	IARS1	TRIP12
DUSP5	IBTK	TRUB1
DUSP7	ICAM5	TSN
DUT	ICMT	TSNAX
DVL1	ID3	TSPAN13
DVL2	IDE	TSPAN3
DVL3	IDH1	TSPAN6
DYM	IDH3A	TSPYL1
DYNC1H1	IER2	TTC17
DYNC1I2	IER5	TTC3
DYNC1LI1	IFI6	TUBB
DYNC1LI2	IFIH1	TVP23B
DYNC2I2	IGF2BP2	TWF1
DYNLL2	IGF2BP3	TWSG1
DYNLT3	IGF2R	TXNRD1
DYRK1A	IGSF3	U2SURP
DYRK2	IGSF9B	UBA2
DZIP3	IK	UBA6
E2F3	IL10RA	UBB
E2F4	IL13RA1	UBE2A
EAF1	IL27RA	UBE2E1
EARS2	IL4R	UBE2E3
EBNA1BP2	IL6R	UBE2G2
EBP	IL6ST	UBE2H
ECD	ILDR2	UBE2J1
ECE1	ILF3	UBE2K
ECHS1	ILRUN	UBE2N
ECI2	IMPDH1	UBE2V2
ECM1	IMPDH2	UBE2W
ECPAS	INAVA	UBE2Z
ECSIT	INF2	UBE3A
ECT2	ING5	UBE4A
EDC3	INO80D	UBQLN1
EDC4	INO80E	UBQLN2
EDEM3	INPP1	UBXN4
EDF1	INPP4A	UHMK1
EEA1	INPP5J	UNG
EEF1A1	INPPL1	UQCRB
EEF1A2	INTS11	USO1
EEF1B2	INTS13	USP12
EEF1D	INTS3	USP14
EEF2	INTS5	USP15
EFCAB14	IP6K1	USP33
EFHD2	IP6K2	USP37
EFL1	IPO13	USP46
EFR3A	IPO5	UTRN
EFTUD2	IPO7	UXS1
EGFL7	IPO9	VAMP3
EGFR	IQCE	VAMP7
EGLN1	IQGAP1	VAPA
EGR1	IQSEC1	VBP1
EHBP1L1	IQSEC2	VCL
EHD2	IRAK1	VCPIP1
EHD4	IREB2	VDAC1
EHHADH	IRF2BP1	VEZF1
EHMT1	IRF2BP2	VGLL4
EHMT2	IRF6	VMA21
EID1	IRGQ	VPS26A
EIF1	ISCA1	VPS35
EIF1AX	ISG15	VPS4B
EIF2A	ISG20L2	VTA1
EIF2AK1	IST1	VTI1A
EIF2AK4	ISYNA1	WAPL
EIF2B1	ITCH	WARS1
EIF2B2	ITGA2	WASL
EIF2B5	ITGA3	WDFY1
EIF2D	ITGA5	WDR26
EIF2S1	ITGAV	WDR3
EIF2S2	ITGB1	WDR36
EIF2S3	ITGB1BP1	WDR43
EIF3A	ITGB4	WSB2
EIF3B	ITM2B	WTAP
EIF3D	ITM2C	WWP1
EIF3E	ITPA	WWTR1
EIF3F	ITPK1	XIAP
EIF3G	ITPR3	XPO1
EIF3H	ITPRID2	XPR1
EIF3I	ITPRIP	XRCC5
EIF3J	ITPRIPL2	XRN1
EIF3K	JMJD6	YAP1
EIF3L	JMY	YBX1
EIF3M	JOSD1	YES1
EIF4A2	JPT1	YIPF5
EIF4B	JUNB	YIPF6
EIF4E2	JUND	YME1L1
EIF4EBP2	JUP	YOD1
EIF4ENIF1	KANK2	YTHDF3
EIF4G1	KANSL1	YWHAB
EIF4G2	KANSL3	YWHAE
EIF4G3	KARS1	YWHAG
EIF4H	KAT6A	YWHAQ
EIF5	KAT7	YWHAZ
EIF5A	KATNIP	ZBTB21
EIF5A2	KBTBD11	ZBTB6
EIF5B	KBTBD2	ZCCHC2
EIF6	KCNG1	ZDHHC20
EIPR1	KCTD10	ZFAND1
ELAC2	KCTD11	ZFAND6
ELAPOR2	KCTD17	ZFHX4
ELF1	KCTD2	ZFP36L1
ELF4	KCTD5	ZFR
ELFN2	KDELR1	ZMPSTE24
ELK1	KDELR2	ZMYND11
ELK3	KDELR3	ZNF146
ELK4	KDM2A	ZNF148
ELL	KDM3B	ZNF207
ELL2	KDM4A	ZNF292
ELMO2	KDM4B	ZNF664
ELMOD2	KDM5B	ZNF721
ELOA	KDM5C	ZNF770
ELOC	KDM6B	ZNF791
ELOVL1	KDM7A	ZNF92
ELOVL5	KEAP1
ELOVL6	KHNYN
ELOVL7	KHSRP
ELP1	KIAA0100
ELP2	KIAA0232
EMB	KIAA0319L
EMC10	KIAA0513
EMC4	KIAA1191
EME2	KIAA1522
EML2	KIAA1671
EML3	KIF13B
EML4	KIF2A
EMP1	KIF3B
EMSY	KIF5B
ENAH	KIFC3
ENDOD1	KIRREL1
ENGASE	KLC2
ENO1	KLF10
ENPP4	KLF13
ENSA	KLF16
ENTPD4	KLHDC10
ENTPD6	KLHDC3
ENTPD7	KLHL15
ENTR1	KLHL18
EP300	KLHL21
EP400	KLHL29
EPAS1	KLHL36
EPB41	KLHL42
EPB41L1	KLHL8
EPB41L2	KLHL9
EPCAM	KLK6
EPDR1	KMT2A
EPG5	KMT2B
EPHA2	KMT2D
EPHB2	KPNA1
EPHB4	KPNA3
EPHX1	KPNA4
EPN1	KPNA6
EPN2	KPNB1
EPOP	KREMEN1
EPPK1	KRI1
EPRS1	KRT10
EPS15	KRT18
EPS8L1	KRT8
EPS8L2	L3MBTL2
ERAL1	LAD1
ERBB2	LAMC1
ERBB3	LAMP1
ERBIN	LAMP2
ERC1	LAMTOR1
ERCC2	LAMTOR2
ERCC3	LAMTOR4
ERCC6	LAMTOR5
EREG	LANCL1
ERF	LAPTM4A
ERG28	LARP1
ERGIC1	LARP4
ERGIC3	LARP4B
ERI1	LARS1
ERI3	LASP1
ERLEC1	LATS1
ERLIN1	LATS2
ERLIN2	LBR
ERMP1	LCMT1
ERO1A	LCOR
ERP29	LDB1
ERP44	LEMD2
ERRFI1	LEMD3
ESAM	LETM1
ESCO1	LETM2
ESF1	LGALS3
ESPN	LGALS3BP
ESRP1	LGALS8
ESRP2	LGALSL
ESRRA	LGMN
ESS2	LHFPL2
ESYT1	LIF
ESYT2	LIFR
ETF1	LIG4
ETFA	LIMK1
ETFDH	LITAF
ETNK1	LLGL1
ETNK2	LLGL2
ETS1	LMAN1
ETV3	LMAN2
ETV4	LMBR1
ETV5	LMNA
EVI5L	LMNB2
EVPL	LMTK2
EWSR1	LMX1B
EXD2	LPGAT1
EXOC2	LPIN2
EXOC3	LPP
EXOC4	LRATD2
EXOC5	LRBA
EXOC6B	LRFN3
EXOC7	LRP10
EXOSC10	LRP5
EXOSC9	LRP6
EXT2	LRPPRC
EXTL3	LRRC14
EYA3	LRRC41
EZR	LRRC58
F11R	LRRC59
F2R	LRRC8A
F2RL1	LRRFIP1
FAAP100	LSM10
FAAP20	LSM12
FADS1	LSM14A
FADS3	LSM4
FAF1	LSR
FAF2	LTA4H
FAM102A	LTBR
FAM102B	LUC7L
FAM104A	LUC7L2
FAM107B	LUZP1
FAM111A	LY6E
FAM117A	LYN
FAM120A	LYPLA1
FAM120AOS	LYPLA2
FAM120B	LYSMD3
FAM122B	LZTS2
FAM126A	LZTS3
FAM126B	MAD2L2
FAM135A	MADD
FAM136A	MAEA
FAM13B	MAF1
FAM160A2	MAFF
FAM160B2	MAFG
FAM168A	MAFK
FAM168B	MAGEA3
FAM169A	MAGED1
FAM171A1	MAK16
FAM171A2	MAL2
FAM171B	MAML1
FAM174C	MAN1A2
FAM189B	MAN2A1
FAM199X	MAN2B1
FAM204A	MAP11
FAM20B	MAP1LC3B
FAM210B	MAP1S
FAM217B	MAP2K1
FAM219B	MAP2K2
FAM234A	MAP2K3
FAM234B	MAP2K4
FAM32A	MAP2K7
FAM3C	MAP3K10
FAM50A	MAP3K11
FAM53B	MAP3K2
FAM53C	MAP3K3
FAM71E1	MAP3K9
FAM83G	MAP4
FAM83H	MAP4K4
FAM8A1	MAP7
FAM91A1	MAP7D1
FAM98A	MAPK1
FAM98B	MAPK1IP1L
FAR1	MAPK8
FARP1	MAPKAP1
FARP2	MAPKAPK2
FARSA	MAPRE1
FASN	MAPRE3
FASTK	MAPT
FAT1	MARCHF5
FAU	MARCHF6
FBH1	MARCHF7
FBL	MARCHF8
FBLN1	MARCKSL1
FBRS	MARK2
FBRSL1	MARK3
FBXL16	MARK4
FBXL18	MARS2
FBXL19	MARVELD1
FBXL3	MAST2
FBXL5	MAST3
FBXL6	MAT2A
FBXO11	MATR3
FBXO2	MAZ
FBXO21	MBD1
FBXO22	MBD2
FBXO28	MBD3
FBXO31	MBD5
FBXO34	MBD6
FBXO38	MBNL1
FBXO41	MBNL2
FBXO44	MBNL3
FBXO45	MBOAT7
FBXO6	MBP
FBXO7	MBTPS1
FBXO9	MCAM
FBXW11	MCFD2
FBXW2	MCL1
FBXW4	MCM3AP
FBXW5	MCRIP1
FCHO2	MCRS1
FCHSD1	MCU
FDFT1	MDFI
FDPS	MDH1
FDXR	MDH2
FECH	MDK
FEM1A	MEA1
FEM1B	MEAK7
FEN1	MECP2
FER	MED1
FERMT2	MED12
FEZ2	MED13
FGFR1	MED13L
FGFR3	MED15
FGFR4	MED24
FGFRL1	MED29
FH	MEF2A
FHL1	MEF2D
FHL2	MEN1
FHOD1	MET
FIG4	METAP1
FKBP14	MEX3C
FKBP15	MFAP3
FKBP1A	MFF
FKBP4	MFN2
FKBP5	MFSD12
FKBP8	MFSD5
FKBP9	MFSD6
FLII	MGAT1
FLNA	MGAT2
FLNB	MGAT4B
FLNC	MGAT5
FLOT1	MGRN1
FLOT2	MIB1
FLYWCH1	MICAL1
FMNL2	MICALL1
FMR1	MICB
FNBP1	MID1IP1
FNBP1L	MIDEAS
FNDC3A	MIDN
FNDC3B	MIEF1
FNIP1	MIEF2
FOCAD	MIF
FOSL1	MINDY2
FOSL2	MINK1
FOXJ2	MINPP1
FOXJ3	MISP
FOXK1	MKI67
FOXK2	MKLN1
FOXN3	MKNK2
FOXO3	MKRN1
FOXO4	MKRN2
FOXP4	MLEC
FPGS	MLF2
FRMD6	MLLT1
FRMD8	MLLT6
FRRS1	MLX
FRYL	MLXIP
FSCN1	MLXIPL
FSD1	MMADHC
FSTL1	MMGT1
FSTL3	MMP15
FTH1	MNT
FTL	MOB1A
FTO	MOB1B
FTSJ3	MOB3A
FUBP1	MOCS1
FUBP3	MON1B
FUCA2	MORF4L1
FUNDC2	MORF4L2
FURIN	MORN2
FUS	MPC2
FXR1	MPG
FXR2	MPP2
FXYD5	MPRIP
FYCO1	MPST
FYTTD1	MPV17
FZD6	MPZL3
FZD7	MR1
FZR1	MRFAP1
G2E3	MRPL18
G3BP1	MRPL19
G3BP2	MRPL20
G6PD	MRPL37
GAA	MRPL4
GABARAPL2	MRPL40
GABPA	MRPL41
GABRQ	MRPL42
GAK	MRPL43
GAL	MRPL47
GALE	MRPL49
GALNS	MRPL52
GALNT1	MRPS10
GALNT10	MRPS15
GALNT11	MRPS18B
GALNT14	MRPS27
GALNT2	MRPS35
GALNT3	MRTFB
GALNT5	MSANTD4
GAN	MSI2
GANAB	MSL2
GAPDH	MSMO1
GAPVD1	MSN
GARS1	MST1R
GART	MSX1
GATA2	MTCH1
GATAD2A	MTF1
GATAD2B	MTF2
GBA2	MTHFD2
GBE1	MTHFR
GBF1	MTMR1
GCC1	MTMR12
GCC2	MTMR2
GCH1	MTMR3
GCN1	MTMR4
GDA	MTMR6
GDAP1	MTOR
GDE1	MTPN
GDF11	MTX3
GDI1	MVB12A
GDI2	MVD
GDPD5	MVP
GEMIN5	MXD1
GET3	MXD4
GFM2	MXRA7
GFPT1	MYADM
GGA2	MYBBP1A
GGA3	MYD88
GGCX	MYH14
GGH	MYH9
GGNBP2	MYL12A
GGT7	MYL12B
GHITM	MYL6
GID8	MYL9
GIGYF1	MYO10
GIGYF2	MYO18A
GIPC1	MYO1D
GIT1	MYO5A
GLB1	MYO6
GLCE	MYO9B
GLE1	MYORG
GLG1	MYPOP
GLIPR2	MYRF
GLO1	MYSM1
GLOD4	NAA20
GLS	NAA30
GLTP	NAA50
GLUD1	NAA60
GLUL	NAB2
GLYR1	NACA
GM2A	NACC1
GMCL1	NACC2
GMFB	NANS
GMIP	NAP1L1
GMPPA	NAT14
GMPR2	NATD1
GMPS	NAXD
GNA11	NBL1
GNA12	NBN
GNA13	NBR1
GNAI1	NCBP2
GNAI2	NCDN
GNAI3	NCEH1
GNAQ	NCKAP1
GNAS	NCKAP5L
GNB1	NCKIPSD
GNB2	NCL
GNB5	NCLN
GNG12	NCOA3
GNG7	NCOA4
GNL1	NCOA6
GNL2	NCOR2
GNL3	NCSTN
GNPDA1	NDEL1
GNPTAB	NDFIP1
GNS	NDFIP2
GOLGA2	NDRG1
GOLGA3	NDRG3
GOLGA4	NDST1
GOLGB1	NDUFA2
GOLM1	NDUFAB1
GOLM2	NDUFAF1
GOLPH3	NDUFB11
GOLT1B	NDUFB2
GON4L	NDUFB9
GOPC	NDUFV1
GORASP1	NEBL
GORASP2	NECAB3
GOSR1	NECAP1
GOSR2	NECAP2
GOT1	NECTIN1
GOT2	NECTIN2
GPAA1	NEDD4
GPAT2	NEK7
GPAT4	NEK9
GPATCH2L	NEO1
GPATCH4	NEU1
GPATCH8	NEU3
GPBP1	NF2
GPBP1L1	NFAT5
GPC1	NFATC1
GPC4	NFATC2IP
GPD1L	NFE2L1
GPD2	NFE2L2
GPI	NFIC
GPKOW	NFKB2
GPN1	NFYA
GPR107	NGFR
GPR108	NHLRC2
GPR153	NIBAN2
GPRC5A	NIPA1
GPRIN1	NIPAL3
GPS1	NIPSNAP1
GPSM1	NKIRAS2
GPT2	NKRF
GPX1	NLGN2
GPX4	NLN
GRAMD1A	NLRX1
GRAMD1C	NMD3
GRB2	NMT1
GRHPR	NOC2L
GRINA	NOC4L
GRIPAP1	NOL11
GRK2	NOMO2
GRK6	NONO
GRN	NOP10
GRSF1	NOP53
GRWD1	NOP58
GSDMA	NOSIP
GSDMD	NOTCH2
GSE1	NOTCH3
GSK3A	NPC1
GSK3B	NPEPPS
GSKIP	NPLOC4
GSN	NPM1
GSPT1	NPTN
GSS	NQO2
GSTK1	NR1D1
GSTO1	NR1D2
GSTO2	NR2C2
GSTP1	NR2F2
GTF2A1	NR2F6
GTF2B	NRAS
GTF2E2	NRBP1
GTF2F1	NRDC
GTF2I	NSD1
GTF2IRD1	NSD3
GTF3C1	NSF
GTF3C2	NSMF
GTF3C3	NT5C2
GTF3C4	NT5C3B
GTF3C5	NTSR1
GTPBP1	NUB1
GTPBP4	NUCB1
GUCD1	NUCKS1
GUK1	NUDCD3
GUSB	NUDT16L1
GXYLT1	NUDT21
GYG1	NUFIP2
GYS1	NUMA1
H1-0	NUMB
H1-10	NUP133
H2AZ2	NUP153
H2BC12	NUP188
H3-3B	NUP50
HABP4	NUP58
HACD2	NUP62
HACD3	NUP98
HADHA	NUTF2
HADHB	NXN
HAGH	NXPH4
HARS1	NYAP1
HARS2	OAS3
HAX1	OAT
HBP1	OAZ2
HBS1L	OCIAD1
HCFC1	OCIAD2
HDAC1	OCRL
HDAC2	ODC1
HDAC3	OGA
HDAC5	OGDH
HDAC6	OGFOD3
HDGF	OGFR
HDGFL2	OGFRL1
HDHD5	OLA1
HDLBP	OPA1
HEATR1	ORAI1
HEATR6	ORAI2
HECA	ORMDL3
HECTD1	OS9
HECTD4	OSBP
HELZ	OSBPL10
HELZ2	OSBPL8
HERC1	OSBPL9
HERC2	OSER1
HERC4	OSGIN2
HERC6	OSMR
HERPUD1	OTUB1
HES4	OTUD4
HES6	OTUD5
HEXB	OTUD7B
HEXIM1	OTULIN
HGH1	OXR1
HGS	OXSR1
HIBADH	P4HB
HID1	PA2G4
HIF1A	PABPC1
HIF1AN	PABPC4
HIGD1A	PACS1
HIGD2A	PACSIN2
HINT1	PAF1
HINT3	PAFAH1B1
HIP1	PAFAH1B2
HIP1R	PAFAH1B3
HIPK1	PAK1
HIPK2	PAK2
HIPK3	PAK6
HIVEP2	PALLD
HK1	PALM2AKAP2
HK2	PAM
HLA-A	PANK3
HLA-C	PAPOLA
HLA-E	PAPSS1
HLCS	PAQR3
HLTF	PAQR4
HMBS	PAQR7
HMCES	PARM1
HMG20A	PARP4
HMG20B	PATL1
HMGA1	PBRM1
HMGA2	PBX2
HMGB1	PCBP1
HMGB3	PCBP2
HMGCL	PCBP4
HMGCR	PCDH1
HMGCS1	PCGF2
HMGN1	PCGF3
HMGN4	PCGF5
HMGXB3	PCGF6
HMOX2	PCMT1
HNRNPA0	PCNP
HNRNPA1	PCNX1
HNRNPA2B1	PCNX3
HNRNPA3	PCNX4
HNRNPAB	PCYT1A
HNRNPC	PCYT2
HNRNPD	PDAP1
HNRNPDL	PDCD2
HNRNPF	PDCD7
HNRNPH1	PDE12
HNRNPH2	PDE4A
HNRNPH3	PDHA1
HNRNPK	PDIA3
HNRNPL	PDK2
HNRNPLL	PDLIM5
HNRNPM	PDLIM7
HNRNPR	PDP1
HNRNPU	PDPK1
HNRNPUL1	PDPR
HNRNPUL2	PDS5A
HOMER1	PDXDC1
HOOK1	PDXK
HP1BP3	PDZD8
HPCAL4	PEA15
HPRT1	PEAK1
HPS1	PERP
HPS3	PEX11B
HPS5	PEX19
HPS6	PEX5
HRAS	PEX6
HS2ST1	PFDN1
HS6ST1	PFKFB3
HS6ST2	PFKM
HSBP1	PFKP
HSD17B10	PFN1
HSD17B12	PFN2
HSD17B4	PGAP6
HSDL1	PGD
HSDL2	PGM1
HSF1	PGM2
HSP90AA1	PHB2
HSP90AB1	PHC2
HSP90B1	PHETA1
HSPA12A	PHF13
HSPA13	PHF2
HSPA4	PHF20
HSPA4L	PHF21A
HSPA5	PHF6
HSPA8	PHF8
HSPA9	PHLDA1
HSPB1	PHLDA3
HSPD1	PHLDB1
HSPG2	PHLPP2
HSPH1	PHRF1
HTATIP2	PHTF2
HTATSF1	PI4K2A
HTRA2	PI4KB
HTT	PIAS1
HUWE1	PIAS3
HYAL1	PIAS4
HYOU1	PICALM
IARS1	PIGS
IARS2	PIH1D1
IBTK	PIK3C2A
ICA1	PIKFYVE
ICAM5	PIM3
ICE1	PIN1
ICMT	PIP4K2B
IDE	PIP4K2C
IDH1	PIP4P2
IDH2	PIP5K1A
IDH3A	PIP5K1C
IDH3B	PITPNA
IDI1	PITPNB
IER3	PITPNM1
IER5	PITX1
IFFO2	PJA2
IFI27L2	PKD1
IFI35	PKIB
IFI6	PKM
IFIH1	PKN1
IFIT1	PKN2
IFNAR1	PKP3
IFRD2	PLAA
IFT81	PLAGL2
IGF2BP3	PLCD3
IGF2R	PLD3
IGFBP2	PLEC
IGSF3	PLEKHA1
IGSF8	PLEKHA4
IK	PLEKHA6
IL11RA	PLEKHA8
IL13RA1	PLEKHB2
IL17RA	PLEKHG2
IL17RE	PLEKHH3
IL1R1	PLEKHM1
IL27RA	PLEKHM2
IL4R	PLEKHO2
IL6R	PLGRKT
IL6ST	PLIN2
ILDR2	PLIN3
ILF3	PLOD1
ILK	PLOD3
ILKAP	PLP2
ILRUN	PLPP2
IMMT	PLPPR2
IMPA1	PLRG1
IMPDH1	PLS3
IMPDH2	PLXNA1
INAVA	PLXNB2
INCENP	PLXND1
INF2	PML
INO80	PMM1
INO80D	PNMA1
INO80E	PNP
INPP4A	PNPLA2
INPP5F	PNPLA6
INPP5J	PNPO
INPPL1	PNRC2
INSIG1	PODXL
INSIG2	POFUT1
INTS1	POGZ
INTS10	POLD2
INTS11	POLDIP2
INTS13	POLDIP3
INTS2	POLE3
INTS3	POLR1D
INTS5	POLR2A
INTS6	POLR2C
INTS8	POLR2E
INTS9	POLR3D
IP6K1	POLR3H
IP6K2	POLRMT
IPO13	POM121
IPO5	POM121C
IPO7	POMGNT1
IPO8	POMK
IPO9	POMP
IPP	POU2F1
IPPK	PPA1
IQGAP1	PPA2
IQSEC1	PPARA
IQSEC2	PPARD
IRAK1	PPCS
IREB2	PPDPF
IRF3	PPFIA1
IRF6	PPFIBP1
IRF7	PPIA
IRGQ	PPIE
IRS1	PPIG
ISCA1	PPIL2
ISG15	PPL
ISG20L2	PPM1A
ISOC1	PPM1F
IST1	PPME1
ISYNA1	PPP1CA
ITCH	PPP1CB
ITFG1	PPP1R10
ITGA2	PPP1R11
ITGA3	PPP1R12A
ITGA5	PPP1R12C
ITGA6	PPP1R13B
ITGA7	PPP1R13L
ITGAV	PPP1R15A
ITGAX	PPP1R15B
ITGB1	PPP1R16A
ITGB1BP1	PPP1R18
[truncated: 3,019 more rows]

## Sheet: Sheet 2
LSM14A-ADAR2dd	APBOEC1-DDX6
AAGAB	AASDHPPT
AAK1	ABCA5
AAMP	ABCB10
AAR2	ABCD3
AARS1	ABCE1
AASDHPPT	ABHD10
AATF	ABHD3
ABAT	ABHD5
ABCA2	ABI1
ABCA3	ABI2
ABCA5	ABRACL
ABCA7	ACADM
ABCB1	ACADSB
ABCB10	ACAP2
ABCB7	ACBD3
ABCB8	ACBD5
ABCC1	ACER3
ABCC4	ACO1
ABCD1	ACOT7
ABCD3	ACOX1
ABCE1	ACP1
ABCF1	ACSL3
ABHD10	ACSL4
ABHD12	ACSL5
ABHD13	ACTB
ABHD17A	ACTG1
ABHD2	ACTN1
ABHD3	ACTN4
ABHD4	ACTR2
ABHD5	ACTR3
ABI1	ACTR6
ABI2	ACVR2B
ABL1	ADAM10
ABL2	ADAM17
ABLIM1	ADAM9
ABLIM3	ADAR
ABR	ADD1
ABRAXAS2	ADD3
ACAA1	ADGRG6
ACACA	ADH5
ACAD9	ADNP
ACADM	AEBP2
ACADSB	AFF1
ACADVL	AFF4
ACAP2	AFTPH
ACAP3	AGAP1
ACAT2	AGFG1
ACBD3	AGGF1
ACBD5	AGL
ACER3	AGO1
ACIN1	AGO2
ACLY	AGO4
ACO1	AGPAT4
ACO2	AGPAT5
ACOT11	AGPS
ACOT7	AHCTF1
ACOX1	AHCYL1
ACP1	AHNAK
ACP2	AIMP1
ACSL1	AK3
ACSL3	AKAP11
ACSL4	AKAP12
ACSL5	AKIRIN1
ACTB	AKT1
ACTG1	ALCAM
ACTN1	ALDH1A3
ACTN4	AMD1
ACTR10	AMFR
ACTR1A	ANKIB1
ACTR1B	ANKMY2
ACTR2	ANKRD13C
ACTR3	ANKRD46
ACTR8	ANKRD50
ACVR1B	ANKRD52
ACVR2B	ANLN
ADA	ANO6
ADAM10	ANP32A
ADAM15	ANP32E
ADAM17	ANXA1
ADAM19	ANXA5
ADAM22	ANXA7
ADAM9	AP1AR
ADAR	AP1S1
ADARB1	AP2B1
ADCY6	AP3M1
ADCY7	AP3S1
ADCY9	AP5M1
ADD1	APC
ADD3	API5
ADGRA3	APLP1
ADGRG1	APLP2
ADGRG6	APMAP
ADGRL1	APOBEC3C
ADH5	APP
ADI1	APPBP2
ADIPOR2	APPL1
ADK	AQR
ADNP	ARCN1
ADNP2	ARF1
ADO	ARF3
ADORA2B	ARF4
ADPRHL1	ARF6
ADRM1	ARFGEF2
AEBP2	ARFIP1
AEN	ARHGAP12
AFAP1	ARHGAP18
AFAP1L1	ARHGAP29
AFDN	ARHGAP5
AFF1	ARHGEF12
AFF4	ARL1
AFG3L2	ARL15
AGAP1	ARL2BP
AGAP2	ARL5A
AGAP3	ARL5B
AGFG1	ARL6IP1
AGGF1	ARL6IP5
AGL	ARL8B
AGO1	ARMC1
AGO2	ARMC8
AGO4	ARMT1
AGPAT1	ARNTL2
AGPAT2	ARPC1A
AGPAT3	ARPC4
AGPAT4	ARPC5
AGPAT5	ARPP19
AGPS	ASAH1
AGRN	ASH1L
AHCTF1	ASPH
AHCY	ATAD1
AHCYL1	ATAD2
AHCYL2	ATE1
AHDC1	ATF2
AHNAK	ATF7IP
AHNAK2	ATG12
AHSA1	ATL2
AIDA	ATL3
AIF1L	ATP11A
AIFM1	ATP11B
AIFM2	ATP13A3
AIMP1	ATP1A1
AIP	ATP1B1
AJM1	ATP1B3
AK2	ATP2A2
AK3	ATP2B1
AK4	ATP2B4
AK6	ATP2C1
AKAP11	ATP5F1B
AKAP12	ATP5F1C
AKAP13	ATP5MC3
AKAP8	ATP5PB
AKAP8L	ATP6AP1
AKIP1	ATP6AP2
AKIRIN1	ATP6V0A1
AKIRIN2	ATP6V0E1
AKR1B1	ATP6V1A
AKT1	ATP6V1B2
AKT1S1	ATP6V1C1
AKT2	ATP6V1D
ALAD	ATP6V1G1
ALAS1	ATP7A
ALCAM	ATRX
ALDH18A1	ATXN10
ALDH1A3	ATXN7
ALDH2	ATXN7L3B
ALDH3A2	AZIN1
ALDH5A1	B2M
ALDH7A1	B3GALNT2
ALDOC	B3GNT5
ALG12	B4GALT1
ALKBH5	BACH1
ALKBH8	BAG2
ALS2	BAG4
AMBRA1	BAZ1B
AMD1	BAZ2A
AMFR	BBX
AMH	BCAS2
AMMECR1L	BCLAF1
AMOTL1	BICD2
AMOTL2	BIRC2
AMPD2	BIRC6
AMZ2	BLCAP
ANAPC1	BLOC1S2
ANAPC13	BLOC1S6
ANAPC2	BMI1
ANAPC5	BMP2K
ANGEL1	BMPR2
ANGEL2	BNIP2
ANKH	BNIP3L
ANKIB1	BORCS7
ANKLE2	BPNT1
ANKMY2	BPNT2
ANKRD11	BRI3BP
ANKRD13A	BRK1
ANKRD13C	BRMS1L
ANKRD17	BROX
ANKRD27	BRWD1
ANKRD28	BSG
ANKRD33B	BTBD1
ANKRD40	BTG3
ANKRD46	BUB3
ANKRD50	BZW1
ANKRD52	C10orf88
ANKRD9	C11orf58
ANKS1A	C12orf29
ANKZF1	C12orf75
ANLN	C1D
ANO10	C1GALT1
ANO6	C21orf91
ANP32A	C2orf49
ANP32B	C2orf69
ANP32E	C4orf3
ANTXR1	C5orf15
ANXA1	C5orf22
ANXA11	C5orf24
ANXA2	C5orf51
ANXA5	C6orf62
ANXA6	CA13
ANXA7	CACUL1
AP1AR	CACYBP
AP1B1	CADM4
AP1G1	CALCOCO2
AP1G2	CALD1
AP1M1	CALM1
AP1M2	CALM2
AP1S1	CALR
AP2A1	CALU
AP2A2	CAMK2D
AP2B1	CAMSAP2
AP2S1	CAMTA1
AP3B1	CAND1
AP3D1	CANX
AP3M1	CAPN2
AP3M2	CAPN6
AP3S1	CAPRIN1
AP4E1	CAPZA1
AP5B1	CAPZA2
AP5M1	CARNMT1
APAF1	CASC3
APBB1	CASK
APBB2	CASP2
APC	CASP7
APEH	CAST
APEX2	CAV1
APH1A	CAV2
API5	CBFB
APLP1	CBL
APLP2	CBX3
APMAP	CBX5
APOOL	CCDC126
APP	CCDC186
APPBP2	CCDC25
APPL1	CCDC47
APPL2	CCDC6
APRT	CCDC91
AQR	CCNC
ARAP1	CCND1
ARAP2	CCNG1
ARCN1	CCNI
AREG	CCNJ
AREL1	CCNT1
ARF1	CCNY
ARF3	CCSAP
ARF4	CCSER2
ARF5	CCT6A
ARF6	CCT8
ARFGAP1	CD109
ARFGAP2	CD164
ARFGEF1	CD2AP
ARFGEF2	CD44
ARFGEF3	CD46
ARFIP1	CD59
ARFIP2	CD81
ARHGAP1	CD9
ARHGAP10	CDC27
ARHGAP11A	CDC42
ARHGAP12	CDC42BPA
ARHGAP17	CDC42SE2
ARHGAP18	CDC73
ARHGAP19	CDCA4
ARHGAP21	CDCP1
ARHGAP23	CDH1
ARHGAP26	CDK1
ARHGAP27	CDK19
ARHGAP29	CDK2AP1
ARHGAP32	CDK6
ARHGAP35	CDS2
ARHGAP39	CDV3
ARHGAP4	CEBPZOS
ARHGAP42	CEP20
ARHGAP5	CEP57
ARHGDIA	CEP97
ARHGEF1	CERS2
ARHGEF11	CERS6
ARHGEF12	CETN2
ARHGEF16	CFAP97
ARHGEF17	CFL1
ARHGEF18	CFL2
ARHGEF19	CGGBP1
ARHGEF26	CHD6
ARHGEF3	CHM
ARHGEF37	CHMP1B
ARHGEF4	CHMP2B
ARHGEF5	CHMP3
ARHGEF7	CHORDC1
ARHGEF9	CHP1
ARID1A	CHURC1
ARID1B	CIAO2A
ARID2	CISD2
ARID4B	CLASP1
ARID5B	CLASP2
ARIH1	CLCN5
ARIH2	CLDN12
ARL1	CLDND1
ARL15	CLIC4
ARL2BP	CLINT1
ARL3	CLIP1
ARL5B	CLIP4
ARL6IP1	CLN5
ARL6IP5	CLOCK
ARL8B	CLSTN1
ARMC1	CLTC
ARMC10	CMPK1
ARMC7	CMTM6
ARMC8	CNBP
ARMCX3	CNIH1
ARMH3	CNIH4
ARMT1	CNN3
ARNT	CNOT1
ARNTL2	CNOT6
ARPC1A	CNOT7
ARPC2	COG6
ARPC3	COL12A1
ARPC4	COL4A5
ARPC5	COL6A1
ARPC5L	COMMD10
ARPP19	COMMD2
ARRB1	COMMD8
ARRB2	COPA
ARRDC1	COPB2
ARRDC2	COPS8
ARRDC3	COQ10B
ARSA	COTL1
ASAH2B	COX7C
ASAP1	CPD
ASAP2	CPE
ASB1	CPEB3
ASB7	CPEB4
ASCC3	CPNE3
ASH1L	CPNE8
ASH2L	CPOX
ASPH	CPSF2
ASRGL1	CREB1
ASXL1	CREBL2
ASXL2	CREBZF
ATAD1	CREG1
ATAD2	CRIM1
ATAD3A	CRNKL1
ATE1	CRYZ
ATF2	CS
ATF4	CSDE1
ATF6	CSE1L
ATF6B	CSGALNACT2
ATF7	CSNK1G3
ATF7IP	CSNK2A1
ATG13	CTBP1
ATG16L1	CTCF
ATG2A	CTDSPL2
ATG2B	CTNNA1
ATG4A	CTNNB1
ATG4B	CTNND1
ATG4D	CTR9
ATG7	CTSB
ATG9A	CTTN
ATIC	CUL4B
ATL3	CUL5
ATM	CXCL16
ATMIN	CYB5B
ATN1	CYB5R3
ATP10D	CYCS
ATP11A	CYFIP1
ATP11B	CYRIB
ATP11C	CYSTM1
ATP13A1	CYTH3
ATP13A2	DAG1
ATP13A3	DARS1
ATP1A1	DARS2
ATP1B3	DAZAP2
ATP2A2	DBI
ATP2A3	DBT
ATP2B1	DCAF7
ATP2B4	DCBLD2
ATP2C1	DCK
ATP5F1A	DCP2
ATP5F1B	DCTN4
ATP5F1E	DCUN1D1
ATP5IF1	DCUN1D4
ATP5MC2	DDAH1
ATP5MF	DDHD2
ATP5PB	DDI2
ATP5PD	DDOST
ATP5PF	DDX17
ATP6AP1	DDX21
ATP6AP2	DDX3X
ATP6V0A1	DDX42
ATP6V0D1	DDX5
ATP6V0E1	DDX52
ATP6V0E2	DDX6
ATP6V1A	DEK
ATP6V1B2	DENND11
ATP6V1C1	DENND4C
ATP6V1D	DENR
ATP6V1E1	DERL1
ATP6V1F	DESI2
ATP6V1H	DHFR
ATP7A	DHX15
ATP8B2	DHX40
ATP9A	DHX9
ATPAF1	DICER1
ATR	DIP2B
ATRN	DKK1
ATRX	DLAT
ATXN1	DLD
ATXN10	DNAJA1
ATXN1L	DNAJB14
ATXN2	DNAJB4
ATXN2L	DNAJB6
ATXN7	DNAJC10
ATXN7L3	DNAJC22
ATXN7L3B	DNAJC24
AUP1	DNAJC3
AURKAIP1	DNAJC8
AVL9	DONSON
AXIN1	DPP8
AXL	DPY19L1
AZI2	DPY19L4
AZIN1	DPYSL3
B2M	DR1
B3GALNT2	DSC2
B3GAT3	DSG2
B3GLCT	DSP
B3GNT5	DSTN
B4GALNT1	DYNC1LI2
B4GALNT3	DYNLL1
B4GALT1	DYNLL2
B4GALT3	DYNLT3
B4GALT5	DZIP3
BABAM1	E2F3
BACH1	EAF1
BAD	ECT2
BAG1	EDEM3
BAG3	EEF1A1
BAG5	EFCAB14
BAG6	EFR3A
BAHCC1	EHHADH
BAHD1	EI24
BAIAP2L1	EID1
BAIAP3	EIF1AX
BAK1	EIF2AK1
BANF1	EIF2AK2
BANP	EIF2S1
BAP1	EIF2S3
BAZ1A	EIF3A
BAZ1B	EIF3J
BAZ2A	EIF3L
BAZ2B	EIF4A2
BBX	EIF4B
BCAM	EIF4E
BCAP31	EIF4EBP2
BCAR1	EIF4G2
BCAS2	EIF4H
BCCIP	EIF5A
BCKDK	EIF5A2
BCL2L1	EIF5B
BCL2L11	ELF1
BCL2L12	ELK3
BCL2L13	ELK4
BCL2L2	ELMOD2
BCL7B	ELOC
BCL7C	ELOVL5
BCL9	ELOVL7
BCL9L	EMC1
BCLAF1	EMC10
BCORL1	EMC4
BCR	ENAH
BDP1	ENOPH1
BECN1	ENPP4
BEND7	ENSA
BET1L	EPAS1
BEX2	EPB41L2
BFAR	EPCAM
BHLHE40	EPM2AIP1
BICD2	EPRS1
BICDL1	EPS15
BIN1	ERBIN
BIN3	EREG
BIRC2	ERG28
BIRC5	ERH
BIRC6	ERI1
BLCAP	ERLEC1
BLMH	ERLIN2
BLOC1S6	ERMP1
BLVRA	ERO1A
BLVRB	ERO1B
BLZF1	ERRFI1
BMI1	ESRP1
BMP1	ESYT2
BMP2K	ETNK1
BMP8A	ETV1
BMPR1A	ETV5
BMPR2	EWSR1
BMS1	EXOC4
BMT2	EXOC5
BNIP1	EXOC6B
BNIP2	EXOC7
BNIP3L	EXOC8
BOD1	EXTL2
BOD1L1	F2R
BOK	F2RL1
BOP1	FADS1
BPGM	FAM107B
BPNT2	FAM120A
BPTF	FAM122B
BRAF	FAM126A
BRAP	FAM126B
BRAT1	FAM160B1
BRD1	FAM168B
BRD2	FAM169A
BRD3	FAM171B
BRD4	FAM199X
BRD7	FAM217B
BRD9	FAM241A
BRF1	FAM3C
BRI3BP	FAM8A1
BRK1	FAM91A1
BRMS1	FAM98A
BROX	FAM98B
BRPF3	FAR1
BRWD1	FAT1
BRWD3	FBXL17
BSDC1	FBXO28
BSG	FBXO3
BSPRY	FBXW11
BTAF1	FDFT1
BTBD1	FDX1
BTBD2	FEM1B
BTBD3	FER
BTBD6	FEZ2
BTBD7	FGD4
BTBD9	FGFR1OP2
BTF3L4	FHL1
BTG1	FKBP14
BTRC	FKBP1A
BUB3	FKBP4
BVES	FKBP5
BZW1	FKBP9
BZW2	FMNL2
C11orf58	FMR1
C11orf95	FNBP1L
C14orf119	FNDC3A
C14orf132	FNDC3B
C16orf72	FNIP1
C17orf58	FOXN3
C18orf25	FRRS1
C19orf25	FRS2
C1GALT1	FRYL
C1GALT1C1	FSCN1
C1orf115	FTH1
C1orf198	FUBP3
C1orf216	FXR1
C1orf43	FYTTD1
C1QBP	FZD6
C1RL	G2E3
C21orf91	G3BP1
C22orf39	G3BP2
C2CD2	GABARAPL1
C2CD3	GABARAPL2
C2CD4C	GABPA
C2orf49	GALNT1
C3orf52	GALNT7
C4orf3	GAN
C5orf15	GANAB
C5orf24	GAPVD1
C5orf51	GBE1
C6orf62	GCA
C6orf89	GCH1
C7orf50	GDA
C8orf33	GDAP1
C8orf82	GDI2
C9orf16	GFM1
C9orf78	GFPT1
CA13	GGNBP2
CAAP1	GHITM
CABIN1	GINM1
CABLES2	GLCE
CACNB3	GLMN
CACTIN	GLO1
CACUL1	GLOD4
CACYBP	GLS
CAD	GLUD1
CALCOCO2	GLUL
CALD1	GM2A
CALM1	GMCL1
CALM3	GMFB
CALR	GNA13
CALU	GNAI1
CAMK1	GNAI2
CAMK2D	GNAI3
CAMK2G	GNAQ
CAMK2N1	GNB1
CAMKK2	GNB5
CAMSAP1	GNG12
CAMSAP2	GNPNAT1
CAMSAP3	GNPTAB
CAMTA1	GNS
CAMTA2	GOLM1
CAND1	GOLM2
CANT1	GOLPH3
CANX	GOLT1B
CAP1	GOPC
CAPG	GPATCH2L
CAPN1	GPBP1L1
CAPN15	GPC4
CAPN2	GPD2
CAPN5	GPR160
CAPN6	GRN
CAPN7	GRPEL2
CAPNS1	GRSF1
CAPRIN1	GSK3B
CAPZA1	GSKIP
CAPZA2	GSPT1
CAPZB	GSR
CARHSP1	GTF2A1
CARM1	GTF2A2
CARMIL1	GTF2H3
CARNMT1	GULP1
CARS1	GXYLT1
CASC3	H1-0
CASK	H2AZ2
CASKIN2	H3-3B
CASP2	HACD2
CASP3	HACD3
CASP7	HACE1
CASP8	HADHA
CASP8AP2	HADHB
CAST	HAT1
CASTOR2	HDAC1
CASZ1	HDAC2
CAV1	HEATR5A
CAV2	HECA
CAVIN1	HELZ
CBFB	HIBADH
CBL	HIF1A
CBLL1	HIGD1A
CBWD1	HINT3
CBWD2	HIPK1
CBWD5	HIPK2
CBX1	HIPK3
CBX2	HLA-A
CBX3	HLA-B
CBX4	HLA-C
CBX5	HLA-DPA1
CBX6	HLA-E
CBX7	HLTF
CBX8	HMGA2
CC2D1A	HMGB1
CCAR1	HMGB3
CCAR2	HMGCR
CCDC117	HMGCS1
CCDC120	HMGN1
CCDC124	HMGN2
CCDC125	HMGN3
CCDC134	HMGN4
CCDC137	HNRNPA0
CCDC186	HNRNPA1
CCDC25	HNRNPA2B1
CCDC43	HNRNPA3
CCDC47	HNRNPAB
CCDC50	HNRNPC
CCDC51	HNRNPDL
CCDC6	HNRNPF
CCDC69	HNRNPH1
CCDC71L	HNRNPH2
CCDC85C	HNRNPH3
CCDC86	HNRNPK
CCDC93	HNRNPR
CCDC97	HNRNPU
CCHCR1	HNRNPUL1
CCM2	HOMER1
CCNB1IP1	HOOK1
CCNC	HOXA9
CCND1	HP1BP3
CCND3	HPRT1
CCNE2	HS2ST1
CCNF	HS6ST2
CCNG1	HSBP1
CCNI	HSD17B11
CCNJ	HSD17B12
CCNK	HSDL1
CCNL2	HSDL2
CCNT1	HSP90AA1
CCNT2	HSP90AB1
CCNY	HSP90B1
CCNYL1	HSPA13
CCP110	HSPA4L
CCSAP	HSPA8
CCSER2	HSPA9
CCT2	HSPH1
CCT3	IARS1
CCT4	IARS2
CCT5	IBTK
CCT6A	IDE
CCT7	IDH1
CCT8	IDH3A
CD109	IDI1
CD151	IER3IP1
CD164	IFNAR1
CD276	IGF2BP3
CD2AP	IGFBP2
CD2BP2	IL6ST
CD44	IMPA1
CD46	INIP
CD47	INO80D
CD59	INPP5F
CD63	INSIG1
CD81	INSIG2
CD82	IPO7
CD99	IQGAP1
CDAN1	IREB2
CDC123	ISCA1
CDC14B	ISOC1
CDC16	ITCH
CDC20	ITFG1
CDC25B	ITGA6
CDC27	ITGAV
CDC34	ITGB1
CDC37	ITM2B
CDC37L1	ITM2C
CDC40	ITPRID2
CDC42	ITSN2
CDC42BPA	IVNS1ABP
CDC42BPB	JAK1
CDC42BPG	JMY
CDC42EP4	JPT1
CDC42SE1	KAT2B
CDC42SE2	KBTBD2
CDC5L	KCTD9
CDC6	KDELR1
CDC7	KDELR3
CDC73	KDM1B
CDCA4	KDM5A
CDCA5	KDM7A
CDCP1	KHDRBS1
CDH1	KIAA0895
CDH24	KIAA1191
CDH3	KIAA1586
CDIP1	KIDINS220
CDK1	KIF1B
CDK12	KIF21A
CDK13	KIF3A
CDK14	KIF5B
CDK16	KITLG
CDK17	KLF10
CDK19	KLHL15
CDK2	KLHL2
CDK2AP1	KLHL28
CDK2AP2	KLHL42
CDK5RAP2	KLHL7
CDK6	KLHL8
CDK8	KLHL9
CDK9	KPNA3
CDKN1A	KPNA6
CDKN1B	KRAS
CDKN2A	KTN1
CDR2L	LAMC1
CDS1	LAMP1
CDS2	LAMP2
CDT1	LAMTOR3
CDV3	LAMTOR5
CDYL	LANCL1
CEBPG	LAPTM4A
CEBPZ	LAPTM4B
CECR2	LARP4
CELF1	LARS1
CELSR1	LBR
CELSR2	LCOR
CEMIP2	LDHA
CENPB	LEMD3
CENPO	LEPROT
CENPT	LEPROTL1
CENPX	LGALS8
CEP104	LGMN
CEP131	LIFR
CEP170	LIG4
CEP170B	LIMA1
CEP20	LIMS1
CEP250	LIN54
CEP295	LIN7C
CEP350	LIPA
CEP68	LITAF
CEP78	LIX1L
CEP97	LLPH
CERCAM	LMAN1
CERK	LMAN2
CERS2	LMBR1
CERS4	LMBRD1
CERS5	LMNB1
CERS6	LMNB2
CERT1	LNPEP
CES2	LNPK
CETN2	LNX2
CFAP36	LPCAT2
CFAP97	LPGAT1
CFDP1	LRBA
CFL1	LRP12
CFL2	LRP6
CGGBP1	LRRC40
CHAF1A	LRRC58
CHAMP1	LRRC8B
CHCHD1	LRRFIP1
CHCHD2	LSM14A
CHCHD3	LTA4H
CHCHD4	LUC7L2
CHD1	LUC7L3
CHD2	LYN
CHD3	LYPLA1
CHD5	LYRM1
CHD6	LYSMD3
CHD7	M6PR
CHD8	MACROH2A1
CHD9	MAGEA3
CHERP	MAGEB2
CHM	MAGEF1
CHMP1A	MAGT1
CHMP2A	MAL2
CHMP2B	MAN1A1
CHMP3	MAN1A2
CHMP4B	MAN2A1
CHMP7	MAOA
CHORDC1	MAP1B
CHP1	MAP1LC3B
CHPF	MAP2K1
CHPF2	MAP2K4
CHPT1	MAP3K13
CHRNB1	MAP3K2
CHST15	MAP3K7
CHSY1	MAP4
CHUK	MAPK1
CIAO1	MAPK1IP1L
CIAO2A	MAPK6
CIAO2B	MAPK9
CIAPIN1	MAPKAPK2
CIB1	MAPRE1
CIC	MARCHF5
CILK1	MARCHF6
CINP	MARCHF7
CIPC	MAT2B
CIRBP	MATR3
CISD2	MBNL1
CIZ1	MBNL2
CKAP2	MBNL3
CKAP4	MBTPS1
CKAP5	MBTPS2
CKB	MCCC2
CKS1B	MCFD2
CLASP1	MCL1
CLASP2	MCM4
CLCN3	MCUR1
CLCN5	MDM2
CLCN7	ME1
CLDN12	ME2
CLDN7	MEAF6
CLDND1	MED1
CLEC16A	MED13
CLGN	MED14
CLIC1	MED21
CLIC3	MED23
CLIC4	MED28
CLINT1	MED4
CLIP1	MEGF9
CLIP2	MESD
CLN8	MEST
CLNS1A	MET
CLOCK	METAP1
CLPB	METAP2
CLPTM1	MEX3C
CLPTM1L	MFGE8
CLPX	MFSD1
CLSTN1	MFSD14B
CLSTN3	MFSD6
CLTA	MFSD8
CLTB	MGAT5
CLTC	MGST1
CLU	MIB1
CLUH	MICU2
CMAS	MIER1
CMBL	MIER3
CMPK1	MINDY3
CMTM3	MINPP1
CMTM4	MKI67
CMTM6	MKLN1
CNBP	MLEC
CNDP2	MLF2
CNIH1	MLX
CNIH4	MMD
CNKSR1	MMGT1
CNN2	MOB1A
CNN3	MOB1B
CNNM2	MOB4
CNNM3	MOCS2
CNNM4	MORF4L1
CNOT1	MORF4L2
CNOT10	MOSMO
CNOT11	MOSPD1
CNOT4	MOSPD2
CNOT6	MPC1
CNOT7	MPC2
CNOT8	MPP7
CNOT9	MPZL1
CNP	MPZL2
CNPY3	MRFAP1
CNST	MRPL19
CNTN1	MRPL30
CNTROB	MRPL35
COA1	MRPL42
COA6	MRPL47
COASY	MRPS14
COBL	MRPS16
COCH	MRPS35
COG1	MRS2
COG4	MRTFB
COG5	MSANTD4
COG6	MSI2
COIL	MSMO1
COL12A1	MSN
COL18A1	MSX1
COL1A1	MTAP
COL4A5	MTDH
COL6A1	MTHFD2
COL6A2	MTM1
COLGALT1	MTMR2
COMMD8	MTMR6
COMMD9	MTPN
COP1	MTREX
COPA	MXI1
COPB1	MXRA7
COPB2	MYBL2
COPE	MYCBP
COPG1	MYL12A
COPG2	MYL12B
COPRS	MYO1B
COPS2	MYO1D
COPS3	MYO5A
COPS4	MYO6
COPS5	MZT1
COPS6	NAA20
COPS7B	NAA50
COPS8	NAB1
COPZ1	NAMPT
COQ5	NAP1L1
COQ9	NAPG
CORO1B	NARS1
CORO1C	NBDY
CORO2A	NBR1
COTL1	NCBP1
COX11	NCBP2
COX15	NCEH1
COX4I1	NCKAP1
COX5B	NCOA3
COX6A1	NCOA4
COX7A2L	NCSTN
COX7C	NDFIP1
COX8A	NDFIP2
CPD	NDRG3
CPE	NDUFA5
CPEB4	NDUFB5
CPNE1	NDUFC1
CPNE2	NDUFS1
CPNE3	NEBL
CPOX	NEDD1
CPS1	NEDD4
CPSF1	NEK7
CPSF3	NEMF
CPSF6	NETO2
CPSF7	NFE2L2
CPT1A	NHLRC2
CPT2	NHS
CRABP2	NIN
CRACD	NIPA1
CRAT	NIPA2
CRBN	NKRF
CREB1	NMD3
CREB3	NME4
CREB3L2	NOLC1
CREBBP	NOTCH2
CREBL2	NPEPPS
CREBRF	NPM1
CREBZF	NPTN
CREG1	NQO1
CRK	NR1D2
CRKL	NRAS
CRLF1	NSD2
CRNKL1	NSF
CROCC	NSL1
CRTAP	NT5E
CRYBG2	NUCKS1
CRYBG3	NUDT21
CRYZ	NUDT4
CS	NUFIP2
CSDE1	NUMB
CSE1L	NUP50
CSGALNACT2	NUP58
CSK	NUS1
CSNK1A1	NUTF2
CSNK1D	NXPE3
CSNK1E	OAS3
CSNK1G1	OAT
CSNK1G2	OAZ1
CSNK1G3	OAZ2
CSNK2A1	OCIAD1
CSNK2A2	ODC1
CSPG4	OGFRL1
CSRNP1	OPA1
CSRP1	OS9
CSRP2	OSBPL8
CST3	OSGIN2
CST6	OSMR
CSTB	OST4
CSTF1	OSTC
CSTF2T	OSTM1
CSTF3	OTUD3
CTBP1	OTUD4
CTBP2	OTUD6B
CTC1	OXR1
CTCF	OXSR1
CTDNEP1	P4HA2
CTDP1	P4HB
CTDSP1	PABPC1
CTDSP2	PACSIN2
CTDSPL	PAFAH1B1
CTDSPL2	PAFAH1B2
CTIF	PAICS
CTNNA1	PAIP1
CTNNAL1	PAK2
CTNNB1	PALLD
CTNNBL1	PALM2AKAP2
CTNND1	PAM
CTPS1	PANK3
CTR9	PAPOLA
CTSA	PAPSS1
CTSB	PAQR3
CTSD	PARM1
CTSL	PARP1
CTSZ	PARP4
CTTN	PATL1
CTTNBP2NL	PAWR
CTU2	PBRM1
CTXN1	PCDH7
CUEDC1	PCGF3
CUEDC2	PCGF5
CUL1	PCMT1
CUL2	PCMTD2
CUL3	PCNP
CUL4A	PCNX1
CUL4B	PCYOX1
CUL5	PDCD10
CUL7	PDCD6IP
CUL9	PDCL
CUX1	PDE12
CWC15	PDE8A
CWC22	PDHA1
CXXC1	PDHB
CXXC5	PDIA3
CYB561	PDIA4
CYB561A3	PDIA6
CYB561D1	PDLIM5
CYB5B	PDP1
CYB5D2	PDP2
CYB5R3	PDS5A
CYB5R4	PDXDC1
CYBA	PDZD11
CYBC1	PDZD8
CYC1	PEAK1
CYCS	PEBP1
CYFIP1	PERP
CYFIP2	PEX13
CYHR1	PFN1
CYLD	PFN2
CYP24A1	PGAM1
CYP26B1	PGD
CYRIB	PGK1
CYSTM1	PGM2
CYTH1	PGM2L1
CYTH3	PGM3
DAAM1	PGRMC1
DAB2IP	PGRMC2
DAG1	PHC3
DAP	PHF10
DAP3	PHF20
DAPK1	PHF6
DAPK3	PHIP
DARS1	PHLDA1
DARS2	PHTF2
DAXX	PI4K2B
DAZAP1	PIAS2
DAZAP2	PICALM
DBI	PIGK
DBN1	PIK3C2A
DBNDD1	PIKFYVE
DBNL	PITPNA
DCAF1	PITPNB
DCAF10	PJA2
DCAF11	PKD2
DCAF12	PKM
DCAF17	PKN2
DCAF5	PLEKHA1
DCAF6	PLEKHB2
DCAF7	PLOD2
DCAF8	PLP2
DCBLD1	PLRG1
DCBLD2	PLS1
DCP1A	PLS3
DCP2	PMP22
DCTD	PNMA1
DCTN1	PNN
DCTN4	PNPLA8
DCTN5	POLR1F
DCUN1D1	POLR2A
DCUN1D3	POLR2K
DCUN1D5	POLR2M
DCXR	POMK
DDA1	PON2
DDAH1	POP4
DDB1	PPAT
DDHD1	PPIC
DDHD2	PPIL1
DDI2	PPM1A
DDOST	PPM1B
DDR1	PPME1
DDX1	PPP1CB
DDX10	PPP1CC
DDX17	PPP1R12A
DDX18	PPP1R14C
DDX19A	PPP1R15B
DDX21	PPP1R2
DDX23	PPP2CA
DDX24	PPP2CB
DDX27	PPP2R1B
DDX39A	PPP2R5C
DDX3X	PPP2R5D
DDX41	PPP3CA
DDX42	PPP3R1
DDX46	PPP4R2
DDX5	PPP4R3B
DDX50	PPP6C
DDX54	PPP6R3
DDX56	PPT1
DDX6	PPTC7
DECR1	PRCP
DEDD	PRDX1
DEF6	PRDX3
DEF8	PRDX6
DEK	PRELID3B
DENND10	PREPL
DENND11	PRKAA1
DENND1A	PRKACA
DENND2C	PRKACB
DENND4B	PRKAR1A
DENND4C	PRKAR2A
DENND5B	PRKCA
DENR	PRKDC
DEPDC1B	PRNP
DERA	PROS1
DERL1	PRPF40A
DESI1	PRPF4B
DESI2	PRPS2
DEXI	PRRC1
DGCR2	PRRG4
DGKD	PSAP
DGKQ	PSAT1
DGKZ	PSIP1
DHCR24	PSMA1
DHCR7	PSMB2
DHRS4L2	PSMB5
DHRS7	PSMD1
DHX15	PSMD10
DHX16	PSMD12
DHX29	PTAR1
DHX30	PTBP1
DHX33	PTBP3
DHX36	PTDSS1
DHX37	PTEN
DHX38	PTGES3
DHX40	PTGFRN
DHX57	PTP4A2
DHX8	PTPN1
DHX9	PTPN11
DIAPH1	PTPRG
DICER1	PTTG1IP
DIDO1	PUM2
DIP2B	PURA
DIP2C	PXDN
DIRAS1	PXN
DIS3	QKI
DKC1	QSER1
DKK1	RAB10
DLAT	RAB11A
DLD	RAB11FIP2
DLG1	RAB12
DLG3	RAB14
DLG5	RAB18
DLST	RAB1A
DMAC2	RAB21
DMAP1	RAB22A
DMKN	RAB2A
DMPK	RAB3GAP1
DMTF1	RAB4A
DMTN	RAB5A
DMWD	RAB5B
DMXL1	RAB5C
DMXL2	RAB6A
DNAAF5	RAB7A
DNAJA1	RAB8B
DNAJA2	RABEP1
DNAJA3	RAC1
DNAJA4	RACGAP1
DNAJB1	RAD1
DNAJB11	RAD21
DNAJB12	RAD23B
DNAJB14	RAI14
DNAJB2	RALGPS2
DNAJB4	RAN
DNAJC1	RANBP2
DNAJC10	RANBP6
DNAJC11	RANBP9
DNAJC13	RAP1A
DNAJC14	RAP1B
DNAJC16	RAP2A
DNAJC2	RAP2C
DNAJC21	RAPH1
DNAJC24	RASSF3
DNAJC3	RASSF8
DNAJC4	RAVER2
DNAJC5	RB1
DNAJC6	RB1CC1
DNAJC7	RBAK
DNAJC8	RBBP4
DNASE1	RBBP7
DNASE2	RBFOX2
DNM1L	RBM12
DNM2	RBM12B
DNMBP	RBM18
DNMT1	RBM27
DNMT3A	RBM3
DNPEP	RBM7
DNTTIP2	RBM8A
DOC2B	RBMS1
DOCK1	RBMX
DOCK3	RBPJ
DOCK5	RC3H2
DOCK6	RCAN3
DOCK7	RCBTB1
DOCK9	RCC2
DOK4	RCN1
DOLPP1	RCN2
DONSON	RCOR3
DOT1L	RDH11
DPCD	RDX
DPEP1	RECQL
DPF2	REEP3
DPH2	REEP5
DPP3	RFK
DPP7	RFX7
DPP8	RHOA
DPP9	RHOBTB3
DPY19L1	RHOQ
DPY19L4	RHOT1
DPYSL3	RICTOR
DR1	RIOK3
DRAP1	RMND5A
DRG1	RNF11
DSC2	RNF14
DSE	RNF141
DSG2	RNF149
DSN1	RNF2
DSP	RNF6
DST	RNGTT
DSTN	RO60
DSTYK	ROCK1
DTX3L	ROCK2
DUS1L	RPE
DUSP11	RPL11
DUSP12	RPL15
DUSP14	RPL22
DUSP3	RPL23
DUSP4	RPL27
DUSP5	RPL31
DUSP7	RPL35A
DUT	RPL36
DVL1	RPL37
DVL2	RPL37A
DVL3	RPL38
DYM	RPL41
DYNC1H1	RPL5
DYNC1I2	RPL7
DYNC1LI1	RPL7A
DYNC1LI2	RPL7L1
DYNC2I2	RPL8
DYNLL2	RPL9
DYNLT3	RPLP1
DYRK2	RPLP2
DZIP3	RPN2
E2F3	RPRD1A
E2F4	RPS12
EAF1	RPS15A
EARS2	RPS16
EBNA1BP2	RPS20
EBP	RPS23
ECE1	RPS24
ECHS1	RPS25
ECI2	RPS27A
ECPAS	RPS6KA3
ECSIT	RPS6KB1
ECT2	RPS7
EDC3	RPSA
EDC4	RRAGA
EDEM1	RRAGD
EDEM3	RRAS2
EDF1	RRM2B
EDRF1	RRN3
EEA1	RSBN1
EEF1A1	RSF1
EEF1A2	RSL24D1
EEF1B2	RSPH3
EEF1D	RTN3
EEF2	RTN4
EFCAB14	RWDD1
EFHD2	RYBP
EFL1	RYK
EFNB2	SACM1L
EFR3A	SACS
EFR3B	SAMD4A
EFTUD2	SAMD4B
EGFL7	SAMD8
EGFR	SAMD9
EGLN1	SAMHD1
EGR1	SAP18
EHBP1L1	SAR1A
EHD1	SAR1B
EHD2	SARAF
EHD4	SBDS
EHHADH	SC5D
EHMT1	SCAF11
EHMT2	SCAMP1
EIF1	SCARB2
EIF1AX	SCD
EIF2A	SCOC
EIF2AK1	SCP2
EIF2AK2	SCPEP1
EIF2AK3	SCRN1
EIF2AK4	SCYL2
EIF2B1	SDC4
EIF2B4	SDCBP
EIF2B5	SDHC
EIF2D	SDHD
EIF2S1	SEC11A
EIF2S2	SEC22B
EIF2S3	SEC23A
EIF3A	SEC23B
EIF3B	SEC23IP
EIF3D	SEC24A
EIF3E	SEC24D
EIF3F	SEC62
EIF3G	SECISBP2L
EIF3H	SEH1L
EIF3I	SEL1L
EIF3J	SEL1L3
EIF3K	SELENOF
EIF3L	SELENOI
EIF3M	SELENOK
EIF4A2	SELENON
EIF4B	SELENOT
EIF4E	SEMA3C
EIF4E2	SENP7
EIF4E3	SEPTIN10
EIF4EBP1	SEPTIN11
EIF4EBP2	SEPTIN2
EIF4ENIF1	SEPTIN7
EIF4G1	SERBP1
EIF4G2	SERINC1
EIF4G3	SERINC3
EIF4H	SERINC5
EIF5	SERP1
EIF5A	SERPINB5
EIF5B	SERPINB9
EIPR1	SERPINE2
ELAC2	SET
ELAPOR2	SETD7
ELAVL1	SF3B1
ELF1	SF3B4
ELF2	SFT2D1
ELF4	SFXN1
ELFN2	SGCB
ELK1	SGMS2
ELK3	SGPL1
ELK4	SGPP1
ELL	SGTB
ELL2	SH3BGRL
ELMO2	SH3BP5
ELMOD2	SH3GLB1
ELOA	SH3KBP1
ELOC	SH3YL1
ELOVL1	SHC1
ELOVL5	SHISA5
ELOVL6	SHLD2
ELOVL7	SHOC2
ELP1	SHTN1
ELP2	SIKE1
EMB	SINHCAF
EMC1	SKA2
EMC10	SKAP2
EMC4	SKIL
EMC7	SKP1
EME2	SLAIN2
EMILIN2	SLBP
EML2	SLC12A2
EML3	SLC12A6
EML4	SLC16A1
EMP1	SLC17A5
EMP2	SLC18B1
EMSY	SLC19A2
ENAH	SLC25A24
ENDOD1	SLC25A36
ENGASE	SLC25A46
ENO1	SLC25A5
ENOPH1	SLC26A2
ENPP4	SLC2A1
ENSA	SLC30A1
ENTPD4	SLC30A4
ENTPD6	SLC30A7
ENTPD7	SLC30A9
ENTR1	SLC31A1
EP400	SLC33A1
EPAS1	SLC35A5
EPB41	SLC35D1
EPB41L1	SLC38A1
EPB41L2	SLC38A2
EPB41L4B	SLC39A10
EPC1	SLC39A14
EPCAM	SLC39A6
EPDR1	SLC39A9
EPG5	SLC41A2
EPHA2	SLC44A1
EPHB2	SLC4A7
EPHB4	SLC5A3
EPHX1	SLC7A6
EPM2AIP1	SLC9A3R1
EPN1	SLC9A6
EPN2	SLF2
EPOP	SLU7
EPPK1	SMAD2
EPRS1	SMAD4
EPS15	SMAD5
EPS8L1	SMARCA1
EPS8L2	SMARCA5
ERBB2	SMARCAD1
ERBB3	SMARCC1
ERBIN	SMARCD2
ERC1	SMC1A
ERCC2	SMC4
ERCC3	SMG1
ERCC6	SMIM13
ERCC6L2	SMIM14
EREG	SMIM15
ERF	SMS
ERG28	SMURF2
ERGIC1	SNAP23
ERGIC3	SNAPC3
ERI1	SNRPB2
ERI2	SNRPD1
ERI3	SNRPD3
ERLEC1	SNU13
ERLIN1	SNX1
ERLIN2	SNX10
ERMP1	SNX13
ERO1A	SNX16
ERO1B	SNX18
ERP29	SNX3
ERP44	SNX6
ERRFI1	SOAT1
ESAM	SOCS4
ESCO1	SOCS6
ESPN	SOD1
ESRP1	SOD2
ESRRA	SON
ESYT1	SORL1
ESYT2	SORT1
ETF1	SOS1
ETFA	SP1
ETNK1	SP3
ETS1	SP4
ETV3	SPAG1
ETV4	SPAG9
ETV5	SPCS2
EVI5	SPCS3
EVI5L	SPIN1
EVPL	SPINT2
EWSR1	SPIRE1
EXD2	SPOCK1
EXOC2	SPOPL
EXOC4	SPPL2A
EXOC5	SPRED1
EXOC6	SPRING1
EXOC6B	SPTBN1
EXOC7	SPTLC1
EXOC8	SPTSSA
EXOSC10	SPTY2D1
EXOSC6	SRD5A1
EXOSC9	SREBF2
EXT2	SREK1IP1
EXTL2	SRP14
EXTL3	SRP72
EYA3	SRP9
EZH2	SRPK2
EZR	SRSF1
F11R	SRSF10
F2R	SRSF11
F2RL1	SRSF2
FA2H	SRSF6
FAAP100	SRSF7
FAAP20	SRSF9
FADS1	SS18
FAF1	SSB
FAF2	SSR1
FAM102A	SSX2IP
FAM102B	ST13
FAM104A	STAG2
FAM107B	STAM2
FAM110C	STARD3NL
FAM111A	STARD4
FAM114A1	STARD7
FAM117A	STAT1
FAM120A	STAU1
FAM120AOS	STAU2
FAM120B	STK24
FAM122B	STK26
FAM126A	STK38L
FAM126B	STMN1
FAM133B	STMP1
FAM136A	STOM
FAM13B	STRBP
FAM155B	STRN
FAM160A1	STT3A
FAM160A2	STT3B
FAM160B1	STX12
FAM160B2	STXBP1
FAM168A	STYX
FAM168B	SUB1
FAM169A	SUCLA2
FAM171A1	SUCLG2
FAM171A2	SUCO
FAM171B	SUDS3
FAM189B	SUMF1
FAM199X	SUMF2
FAM204A	SUMO1
FAM20B	SUMO2
FAM210B	SUN1
FAM214A	SURF4
FAM214B	SUZ12
FAM217B	SVIP
FAM219A	SYAP1
FAM219B	SYNCRIP
FAM220A	SYNE2
FAM234A	SYNGR2
FAM234B	SYNJ2BP
FAM241A	SYPL1
FAM241B	SYT1
FAM32A	SZRD1
FAM3C	TAB2
FAM50A	TAB3
FAM53B	TACC1
FAM53C	TAF13
FAM71E1	TAF15
FAM83F	TAF9B
FAM83G	TAGLN2
FAM83H	TAOK1
FAM8A1	TAP2
FAM91A1	TARDBP
FAM98A	TAX1BP1
FAM98B	TBC1D23
FAN1	TBC1D8B
FANCI	TBCEL
FAR1	TBL1XR1
FARP1	TCEA1
FARP2	TCEAL8
FARSA	TCEAL9
FASN	TCF12
FASTK	TEAD1
FASTKD2	TENT4B
FAT1	TES
FAU	TFAM
FBH1	TFDP1
FBL	TFRC
FBLN1	TGFA
FBRS	TGFBR1
FBRSL1	TGOLN2
FBXL16	TGS1
FBXL17	THAP12
FBXL18	THAP5
FBXL20	THOC2
FBXL3	THOC3
FBXL5	THRAP3
FBXL6	TIMM17A
FBXO11	TIMP2
FBXO2	TIMP3
FBXO21	TIPRL
FBXO22	TKT
FBXO25	TLCD4
FBXO28	TLK1
FBXO3	TM2D1
FBXO31	TM7SF3
FBXO34	TM9SF2
FBXO38	TM9SF3
FBXO41	TMBIM1
FBXO42	TMBIM6
FBXO44	TMCO1
FBXO45	TMED10
FBXO7	TMED2
FBXO9	TMED4
FBXW11	TMED5
FBXW2	TMED7
FBXW4	TMED8
FBXW5	TMEM106B
FCHO2	TMEM123
FCHSD1	TMEM135
FDFT1	TMEM14A
FDPS	TMEM165
FDXR	TMEM167A
FECH	TMEM168
FEM1A	TMEM170A
FEM1B	TMEM181
FEN1	TMEM183A
FER	TMEM19
FERMT2	TMEM209
FEZ2	TMEM230
FGD4	TMEM245
FGD6	TMEM248
FGFR1	TMEM263
FGFR3	TMEM30A
FGFR4	TMEM33
FGFRL1	TMEM38B
FH	TMEM41B
FHL1	TMEM50A
FHL2	TMEM59
FHOD1	TMEM64
FIBCD1	TMEM65
FIG4	TMEM87B
FKBP14	TMEM9
FKBP15	TMEM9B
FKBP1A	TMF1
FKBP3	TMOD3
FKBP4	TMPO
FKBP5	TMPRSS11E
FKBP8	TMSB10
FKBP9	TMSB4X
FKTN	TMTC3
FLII	TMX1
FLNA	TMX3
FLNB	TNFRSF10B
FLNC	TNFRSF10D
FLOT1	TNKS
FLOT2	TNKS2
FLVCR1	TNPO1
FLYWCH1	TOMM20
FMNL2	TOMM34
FMR1	TOP1
FNBP1	TOP2A
FNBP1L	TOP2B
FNDC3A	TOPBP1
FNDC3B	TOR1AIP1
FNIP1	TOR1AIP2
FNIP2	TOX4
FNTB	TP53INP1
FOCAD	TPD52
FOSL1	TPD52L2
FOSL2	TPI1
FOXJ2	TPM3
FOXJ3	TPMT
FOXK1	TPP1
FOXK2	TPT1
FOXN2	TRA2A
FOXN3	TRA2B
FOXO3	TRAM1
FOXO4	TRAPPC13
FOXP4	TRIM2
FPGS	TRIM23
FRK	TRIM33
FRMD6	TRIM5
FRMD8	TRIP12
FRRS1	TRUB1
FRS2	TSN
FRYL	TSNAX
FSCN1	TSPAN13
FSD1	TSPAN3
FSTL1	TSPAN6
FSTL3	TSPAN7
FTH1	TSPYL1
FTL	TTC17
FTO	TTC3
FTSJ3	TTC33
FUBP1	TTC7B
FUBP3	TVP23B
FUCA2	TWF1
FUNDC2	TWSG1
FURIN	TXNDC15
FUS	TXNRD1
FUT1	TYW3
FXR1	U2AF2
FXR2	U2SURP
FXYD5	UBA2
FYCO1	UBA5
FYTTD1	UBA6
FZD1	UBAP2L
FZD5	UBB
FZD6	UBE2A
FZR1	UBE2B
G2E3	UBE2D2
G3BP1	UBE2D3
G3BP2	UBE2E1
G6PD	UBE2E3
GAA	UBE2G2
GAB2	UBE2H
GABARAPL2	UBE2I
GABPA	UBE2J1
GAK	UBE2K
GAL	UBE2N
GALE	UBE2V2
GALNS	UBE2W
GALNT1	UBE2Z
GALNT10	UBE3A
GALNT11	UBFD1
GALNT2	UBL3
GALNT5	UBP1
GALNT7	UBQLN1
GAMT	UBQLN2
GAN	UBR3
GANAB	UBXN4
GAPDH	UBXN7
GAPVD1	UCHL5
GAREM2	UFL1
GARRE1	UFM1
GARS1	UGGT1
GART	UGGT2
GAS2L3	UHMK1
GAS7	ULBP2
GATAD1	UNG
GATAD2A	USO1
GATAD2B	USP1
GATC	USP12
GBA2	USP32
GBE1	USP33
GBF1	USP46
GCC1	USP53
GCC2	UTP23
GCH1	UTP3
GCN1	UXS1
GDA	VAMP3
GDAP1	VAMP7
GDE1	VAPA
GDF11	VBP1
GDI1	VCL
GDI2	VDAC2
GDPD5	VEZF1
GEMIN4	VGLL4
GET3	VHL
GFM1	VIRMA
GFM2	VKORC1L1
GFPT1	VMA21
GFUS	VPS13C
GGA2	VPS26A
GGA3	VPS35
GGH	VPS36
GGNBP2	VPS41
GHDC	VPS4B
GHITM	VTA1
GID8	WAC
GIGYF1	WARS1
GIGYF2	WASF1
GINM1	WASHC4
GIPC1	WDFY1
GIT1	WDR26
GIT2	WDR36
GLB1	WDR41
GLCE	WDR6
GLE1	WDR72
GLG1	WDR82
GLIPR2	WDR89
GLMP	WLS
GLO1	WSB2
GLOD4	WWC2
GLS	WWTR1
GLTP	XBP1
GLUD1	XIAP
GLUL	XPNPEP1
GLYR1	XPO1
GM2A	XPO4
GMCL1	XPO7
GMEB1	XPR1
GMEB2	XRCC5
GMFB	YAP1
GMIP	YBX1
GMPPA	YEATS4
GMPR2	YES1
GMPS	YIPF4
GNA11	YIPF5
GNA12	YIPF6
GNA13	YME1L1
GNAI1	YOD1
GNAI2	YTHDC2
GNAI3	YTHDF3
GNAQ	YWHAB
GNAS	YWHAE
GNB1	YWHAG
GNB2	YWHAQ
GNG12	YWHAZ
GNG7	ZBTB10
GNL1	ZBTB33
GNL2	ZBTB41
GNL3	ZBTB6
GNPAT	ZC3H12C
GNPDA1	ZC3H14
GNPTAB	ZC3H15
GNS	ZC3HAV1
GOLGA2	ZDHHC20
GOLGA3	ZDHHC6
GOLGA4	ZDHHC9
GOLGA5	ZFAND1
GOLGA7B	ZFAND5
GOLGB1	ZFAND6
GOLM1	ZFHX3
GOLM2	ZFP91
GOLPH3	ZFR
GOLPH3L	ZFYVE16
GON4L	ZHX1
GOPC	ZKSCAN1
GORASP1	ZMAT3
GORASP2	ZMPSTE24
GOSR1	ZMYM4
GOT1	ZMYND11
GOT2	ZNF146
GPAA1	ZNF148
GPAT2	ZNF24
GPAT4	ZNF264
GPATCH11	ZNF292
GPATCH2L	ZNF326
GPATCH4	ZNF37A
GPATCH8	ZNF451
GPBP1	ZNF518A
GPBP1L1	ZNF638
GPC1	ZNF652
GPC4	ZNF655
GPCPD1	ZNF664
GPD1L	ZNF711
GPD2	ZNF770
GPHN	ZNF791
GPI	ZNF81
GPKOW	ZNF92
GPN1	ZRANB2
GPN2	ZYG11B
GPR107
GPR137B
GPR153
GPR180
GPR89A
GPRASP2
GPRC5A
GPRIN1
GPS1
GPSM1
GPSM2
GPX1
GPX4
GRAMD1A
GRAMD1B
GRAMD1C
GRAMD4
GRB10
GRB2
GREB1L
GRHL2
GRINA
GRIPAP1
GRK2
GRK3
GRK6
GRN
GRPEL2
GRSF1
GRTP1
GRWD1
GSDMD
GSE1
GSK3A
GSK3B
GSKIP
GSN
GSPT1
GSS
GSTO1
GSTO2
GSTP1
GTDC1
GTF2A1
GTF2B
GTF2E2
GTF2F1
GTF2I
GTF2IRD1
GTF3A
GTF3C1
GTF3C2
GTF3C3
GTF3C4
GTF3C5
GTPBP1
GTPBP4
GTPBP6
GTSF1
GUCD1
GUK1
GULP1
GUSB
GXYLT1
GYG1
GYS1
GZF1
H1-0
H1-10
H2AZ2
H2BC12
H3-3B
H3C6
HABP4
HACD2
HACD3
HADHA
HADHB
HAGH
HARS1
HARS2
HAX1
HBP1
HBS1L
HCFC1
HDAC1
HDAC11
HDAC2
HDAC3
HDAC5
HDAC6
HDDC2
HDGF
HDGFL2
HDHD5
HDLBP
HEATR1
HEATR3
HEATR5B
HEATR6
HECA
HECTD1
HECTD4
HELZ
HELZ2
HERC1
HERC2
HERC4
HERC6
HERPUD1
HERPUD2
HES4
HES6
HEXB
HEXIM1
HGS
HIBADH
HIC2
HID1
HIF1A
HIF1AN
HIGD1A
HIGD2A
HINT1
HINT3
HIP1
HIP1R
HIPK1
HIPK2
HIPK3
HIRA
[truncated: 3,540 more rows]

## Sheet: Sheet 3
LSM14A-ADAR2dd	APBOEC1-DDX6
AAGAB	AAGAB
AAK1	AASDHPPT
AAMP	ABCB10
AAR2	ABCD3
AARS1	ABCE1
AASDHPPT	ABCF1
AATF	ABHD10
ABCA3	ABHD2
ABCB10	ABHD5
ABCB7	ABI1
ABCC1	ABI2
ABCC4	ABL2
ABCC5	ABLIM1
ABCD1	ABRAXAS2
ABCD3	AC069544.1
ABCE1	ACACA
ABCF1	ACADM
ABHD12	ACAP2
ABHD17A	ACAT1
ABHD17B	ACBD3
ABHD2	ACBD5
ABI1	ACLY
ABI2	ACOX1
ABL1	ACP1
ABL2	ACSL1
ABLIM1	ACSL3
ABR	ACSL4
AC069544.1	ACTB
ACAA2	ACTG1
ACACA	ACTR2
ACAD9	ACTR3
ACADM	ACTR3B
ACADVL	ACTR6
ACAP2	ACVR2B
ACAT1	ADAM9
ACAT2	ADAR
ACBD3	ADD3
ACBD6	ADGRA3
ACD	ADGRL2
ACER3	ADH5
ACIN1	ADI1
ACLY	ADIPOR1
ACO1	ADIPOR2
ACO2	ADNP
ACOT2	ADO
ACOX1	ADSS2
ACP1	AEBP2
ACSL1	AEN
ACSL3	AFDN
ACSL4	AFF1
ACSS1	AFF4
ACTB	AFG3L2
ACTG1	AGFG1
ACTN1	AGGF1
ACTN4	AGK
ACTR1A	AGL
ACTR1B	AGO1
ACTR2	AGO2
ACTR3	AGPAT5
ACVR2B	AGPS
ADAM10	AGTPBP1
ADAM11	AHCY
ADAM15	AHCYL1
ADAM17	AIDA
ADAM9	AIFM1
ADAMTS1	AK2
ADAR	AK3
ADARB1	AK4
ADCK2	AKAP11
ADCY1	AKAP12
ADCY6	AKIRIN1
ADCY9	AKR1B1
ADD1	AKT1
ADD2	AKT3
ADD3	ALCAM
ADGRB2	ALDH18A1
ADGRL1	ALDH1L2
ADGRL2	ALDH3A2
ADH5	ALDH5A1
ADI1	ALDH7A1
ADIPOR1	ALG6
ADIPOR2	ALKBH5
ADK	ALMS1
ADNP	AMD1
ADNP2	AMFR
ADO	AMMECR1
ADRM1	AMMECR1L
AEBP2	AMOT
AEN	AMOTL1
AFDN	AMZ2
AFF1	ANAPC1
AFF4	ANAPC13
AFG3L2	ANAPC16
AGAP1	ANGEL1
AGAP3	ANGEL2
AGBL5	ANK3
AGFG1	ANKIB1
AGGF1	ANKLE2
AGL	ANKRD13C
AGO1	ANKRD17
AGO2	ANKRD28
AGO4	ANKRD40
AGPAT1	ANKRD46
AGPAT3	ANKRD50
AGPAT4	ANKRD52
AGPAT5	ANLN
AGPS	ANO5
AGRN	ANP32A
AGTPBP1	ANP32B
AHCTF1	ANP32E
AHCY	ANTXR1
AHCYL1	ANXA5
AHCYL2	AP1AR
AHDC1	AP1G1
AHNAK	AP1S1
AHSA1	AP2B1
AIDA	AP2M1
AIF1L	AP3B1
AIFM1	AP3M1
AIMP1	AP3S1
AIP	AP5M1
AK2	APAF1
AK3	APBB2
AK4	APC
AK6	APEX1
AKAP11	APH1A
AKAP12	API5
AKAP13	APLP2
AKAP8L	APMAP
AKAP9	APOBEC3C
AKIP1	APOOL
AKIRIN1	APP
AKIRIN2	APPBP2
AKR1A1	APPL1
AKR1B1	APTX
AKT1	AQR
AKT2	ARCN1
AKT3	AREL1
ALCAM	ARF1
ALDH18A1	ARF3
ALDH1A2	ARF4
ALDH1L2	ARF6
ALDH2	ARFGEF1
ALDH3A2	ARFGEF2
ALDH5A1	ARFIP1
ALDH7A1	ARHGAP11A
ALDH9A1	ARHGAP12
ALG12	ARHGAP19
ALG13	ARHGAP21
ALG3	ARHGAP35
ALG8	ARHGAP5
ALKBH5	ARHGEF12
ALMS1	ARID1A
ALS2	ARID2
AMBRA1	ARID4A
AMD1	ARIH1
AMER1	ARIH2
AMFR	ARL1
AMMECR1	ARL13B
AMOT	ARL2BP
AMOTL1	ARL5B
AMPD2	ARL6IP1
AMZ2	ARL6IP5
ANAPC13	ARL6IP6
ANAPC15	ARL8B
ANAPC5	ARMC1
ANAPC7	ARMC8
ANGEL1	ARMCX3
ANGEL2	ARMT1
ANK3	ARNT
ANKFY1	ARNTL2
ANKH	ARPC1A
ANKIB1	ARPC2
ANKLE2	ARPC3
ANKRD11	ARPC4
ANKRD13C	ARPC5
ANKRD17	ARPP19
ANKRD28	ARRB2
ANKRD40	ARRDC4
ANKRD46	ARV1
ANKRD50	ASAH1
ANKRD52	ASAP1
ANKRD54	ASB7
ANKRD9	ASCC3
ANKS1A	ASH1L
ANKS6	ASPH
ANKZF1	ASPM
ANLN	ASRGL1
ANO6	ASXL2
ANP32A	ATAD1
ANP32B	ATAD2
ANP32E	ATF2
ANTXR1	ATF6
ANXA11	ATF7IP
ANXA2	ATG12
ANXA5	ATG13
ANXA6	ATG2B
AP1B1	ATG4A
AP1G1	ATG5
AP1M1	ATL2
AP1S1	ATL3
AP2A1	ATP11B
AP2A2	ATP11C
AP2B1	ATP13A3
AP2S1	ATP1A1
AP3B1	ATP1B1
AP3D1	ATP1B3
AP3M1	ATP2A2
AP3M2	ATP2B1
AP3S1	ATP2B4
AP3S2	ATP2C1
AP5M1	ATP5F1A
APAF1	ATP5F1B
APBB1	ATP5F1D
APC	ATP5F1E
APEH	ATP5MG
APEX1	ATP5PB
APH1A	ATP5PF
API5	ATP6AP1
APLP1	ATP6AP2
APLP2	ATP6V0A2
APOE	ATP6V0D1
APP	ATP6V0E1
APPBP2	ATP6V0E2
APPL1	ATP6V1A
APRT	ATP6V1C1
AQR	ATP6V1D
ARAP1	ATP6V1G1
ARCN1	ATP9A
AREL1	ATPAF1
ARF1	ATRN
ARF3	ATRX
ARF4	ATXN1
ARF5	ATXN10
ARF6	ATXN1L
ARFGAP2	ATXN7
ARFGAP3	ATXN7L3B
ARFGEF1	AVL9
ARFGEF2	AZI2
ARFGEF3	AZIN1
ARFIP1	B2M
ARFIP2	B3GALNT2
ARHGAP11A	B3GNT5
ARHGAP17	B4GAT1
ARHGAP19	BACE1
ARHGAP21	BACH1
ARHGAP29	BAG4
ARHGAP32	BAG5
ARHGAP35	BANF1
ARHGAP39	BAZ1A
ARHGAP5	BAZ1B
ARHGDIA	BAZ2A
ARHGEF1	BBX
ARHGEF11	BCAS2
ARHGEF12	BCAT1
ARHGEF18	BCCIP
ARHGEF2	BCLAF1
ARHGEF26	BCOR
ARHGEF3	BDP1
ARHGEF6	BEND4
ARHGEF7	BEX3
ARID1A	BEX4
ARID1B	BFAR
ARID2	BIRC2
ARID3A	BIRC5
ARID3B	BIRC6
ARID4B	BLCAP
ARIH1	BLM
ARIH2	BLOC1S2
ARL1	BLOC1S5
ARL14EP	BLOC1S6
ARL15	BLZF1
ARL2BP	BMI1
ARL5B	BMP2K
ARL6IP1	BMPR2
ARL6IP5	BMT2
ARL8B	BNIP3L
ARMC1	BOD1
ARMC6	BORA
ARMC8	BPGM
ARMCX3	BPHL
ARMH3	BPNT1
ARMT1	BPNT2
ARNT	BRAF
ARNT2	BRCA1
ARNTL2	BRCA2
ARPC2	BRCC3
ARPC3	BRD3
ARPC5	BRI3BP
ARPC5L	BRIP1
ARPP19	BRK1
ARRB2	BRMS1L
ARSA	BROX
ASAP1	BRWD1
ASB1	BRWD3
ASB6	BSG
ASB7	BTBD1
ASB8	BTBD10
ASCC3	BTBD3
ASF1B	BTBD7
ASH1L	BTF3
ASPH	BTF3L4
ASPM	BTG2
ASRGL1	BTRC
ASXL1	BUB1
ASXL2	BUB3
ATAD1	BVES
ATAD2	BZW1
ATAD3B	C11orf58
ATF1	C11orf95
ATF2	C12orf29
ATF4	C14orf132
ATF6	C16orf72
ATF6B	C18orf25
ATF7	C18orf54
ATF7IP	C1D
ATG13	C1GALT1
ATG16L1	C1orf109
ATG2B	C1orf198
ATG3	C1orf52
ATG4D	C1QBP
ATG9A	C21orf91
ATIC	C2CD5
ATL2	C2orf49
ATL3	C2orf69
ATM	C3orf38
ATN1	C4orf3
ATP11A	C4orf46
ATP11B	C5orf15
ATP11C	C5orf24
ATP13A2	C5orf51
ATP13A3	C6orf120
ATP1A1	C6orf62
ATP1B3	C6orf89
ATP2A2	C8orf33
ATP2B1	C9orf40
ATP2B4	C9orf78
ATP2C1	CA2
ATP5F1A	CAAP1
ATP5F1B	CAB39
ATP5F1C	CACUL1
ATP5F1E	CACYBP
ATP5IF1	CADM1
ATP5MC2	CALCB
ATP5MC3	CALCOCO2
ATP5ME	CALD1
ATP5MF	CALM1
ATP5MPL	CALM2
ATP5PB	CALM3
ATP5PD	CALR
ATP5PF	CALU
ATP6AP1	CAMLG
ATP6AP2	CAMSAP1
ATP6V0A1	CAMSAP2
ATP6V0A2	CAMTA1
ATP6V0D1	CAND1
ATP6V0E2	CANT1
ATP6V1A	CANX
ATP6V1B2	CAP1
ATP6V1C1	CAPN2
ATP6V1D	CAPN7
ATP6V1E1	CAPNS1
ATP6V1G1	CAPRIN1
ATP6V1H	CAPZA1
ATP7B	CAPZA2
ATP8B2	CAPZB
ATP9A	CARNMT1
ATPAF1	CASC3
ATR	CASD1
ATRAID	CASP2
ATRN	CASP3
ATRX	CAST
ATXN1	CBFB
ATXN1L	CBL
ATXN2L	CBLL1
ATXN7	CBR1
ATXN7L3	CBWD2
ATXN7L3B	CBX1
AURKA	CBX3
AURKAIP1	CBX5
AURKB	CBX6
AVL9	CCDC117
AXIN1	CCDC186
AZIN1	CCDC25
B2M	CCDC43
B3GALNT2	CCDC47
B3GALT6	CCDC6
B3GAT3	CCDC88A
B3GNT5	CCDC90B
B4GALNT3	CCNA2
B4GALT1	CCNB1IP1
B4GALT3	CCNC
B4GALT6	CCND1
B4GALT7	CCNE2
BACE1	CCNG1
BACH1	CCNI
BAD	CCNJ
BAG1	CCNK
BAG3	CCNT1
BAG4	CCNT2
BAG5	CCNY
BAG6	CCNYL1
BAHCC1	CCP110
BAHD1	CCSAP
BAIAP2L1	CCSER2
BAK1	CCT4
BANF1	CCT6A
BAP1	CCT8
BAZ1A	CD164
BAZ1B	CD276
BAZ2A	CD2AP
BAZ2B	CD302
BBS7	CD46
BBX	CD59
BCAP31	CD81
BCAR1	CDC123
BCAT1	CDC14B
BCCIP	CDC23
BCL2L11	CDC25A
BCL2L12	CDC27
BCL2L13	CDC40
BCL2L2	CDC42
BCL7A	CDC42BPA
BCL7B	CDC5L
BCL7C	CDC6
BCL9	CDC7
BCLAF1	CDC73
BCOR	CDCA7
BCORL1	CDCA7L
BCR	CDIPT
BDP1	CDK1
BECN1	CDK12
BEND4	CDK13
BEND7	CDK14
BET1	CDK16
BET1L	CDK17
BEX2	CDK2
BEX3	CDK4
BFAR	CDK6
BICD2	CDKN1A
BIRC2	CDKN1B
BIRC5	CDKN2AIPNL
BIRC6	CDS1
BIVM	CDS2
BLCAP	CDV3
BLM	CEBPG
BLMH	CEBPZOS
BLOC1S6	CELF1
BLVRA	CEMIP2
BLVRB	CENPE
BLZF1	CENPI
BMF	CEP120
BMI1	CEP170
BMP2K	CEP192
BMP7	CEP20
BMPR2	CEP350
BMS1	CEP43
BNIP2	CEP57
BNIP3L	CEP70
BOD1	CEP85L
BOD1L1	CEP97
BOP1	CEPT1
BPGM	CERK
BPNT2	CERS2
BPTF	CERS5
BRAF	CERS6
BRAP	CERT1
BRAT1	CETN2
BRCA1	CFAP97
BRCA2	CFL1
BRD1	CFL2
BRD2	CGGBP1
BRD3	CHAMP1
BRD3OS	CHCHD2
BRD4	CHCHD7
BRD7	CHD4
BRD8	CHD7
BRF1	CHD9
BRI3BP	CHEK1
BRIP1	CHIC1
BRK1	CHM
BRMS1L	CHML
BROX	CHMP2B
BRPF3	CHMP3
BRWD1	CHMP4B
BRWD3	CHMP5
BSDC1	CHORDC1
BSG	CHP1
BTAF1	CHPT1
BTBD1	CHRAC1
BTBD2	CHSY1
BTBD3	CHUK
BTBD7	CHURC1
BTF3	CIAO1
BTF3L4	CIPC
BTG2	CIR1
BTG3	CISD2
BTN2A1	CKAP2
BTRC	CKAP2L
BUB1	CKAP4
BUB1B	CKAP5
BYSL	CKB
BZW1	CKS1B
BZW2	CLASP1
C11orf58	CLASP2
C11orf95	CLCN3
C12orf4	CLDN12
C12orf57	CLDND1
C14orf132	CLGN
C15orf39	CLIC4
C16orf72	CLINT1
C16orf87	CLIP1
C18orf25	CLIP4
C19orf25	CLN5
C19orf53	CLNS1A
C1GALT1	CLOCK
C1GALT1C1	CLPTM1L
C1orf109	CLTA
C1orf122	CLTC
C1orf198	CMAS
C1orf216	CMPK1
C1orf35	CMTM4
C1orf43	CMTM6
C1QBP	CNBP
C20orf194	CNIH1
C20orf27	CNIH4
C21orf91	CNN3
C22orf39	CNOT1
C2orf49	CNOT11
C3orf52	CNOT6
C4orf3	CNOT6L
C5orf15	CNOT7
C5orf24	CNOT8
C5orf51	CNOT9
C6orf120	COA6
C6orf62	COIL
C6orf89	COL4A5
C7orf50	COL6A1
C8orf33	COLGALT1
C9orf78	COMMD2
CA2	COMMD6
CAAP1	COPA
CABIN1	COPB1
CABLES1	COPB2
CABLES2	COPS7A
CACUL1	COPS8
CACYBP	COPZ1
CAD	COQ10B
CADM1	CORO1C
CALCOCO2	COTL1
CALD1	COX11
CALM1	COX5A
CALM2	COX6A1
CALR	COX6C
CALU	COX7C
CAMK2G	CPD
CAMKK2	CPE
CAMSAP1	CPEB2
CAMSAP2	CPEB4
CAMTA1	CPNE3
CAND1	CPOX
CANT1	CPSF2
CANX	CPSF3
CAP1	CPSF6
CAPN1	CPT1A
CAPN15	CREB1
CAPN2	CREB3L2
CAPN7	CREBBP
CAPNS1	CREBRF
CAPRIN1	CREG1
CAPZA1	CRK
CAPZA2	CRKL
CAPZB	CRTAP
CARHSP1	CRYBG3
CARM1	CS
CARNMT1	CSDE1
CARS1	CSE1L
CASC3	CSGALNACT2
CASK	CSNK1G1
CASKIN2	CSNK1G3
CASP2	CSNK2A1
CASP3	CSTF2T
CASP7	CSTF3
CASP8AP2	CTCF
CAST	CTDSPL
CASZ1	CTDSPL2
CAVIN1	CTNNA1
CBFB	CTNNB1
CBL	CTNNBIP1
CBLL1	CTR9
CBR4	CTSB
CBWD1	CTSC
CBX1	CTSL
CBX2	CTTN
CBX3	CUL2
CBX5	CUL3
CBX6	CUL4B
CBX7	CUL5
CBY1	CUX1
CC2D1B	CXorf56
CCAR1	CYB5B
CCAR2	CYB5R3
CCDC117	CYB5R4
CCDC124	CYBRD1
CCDC134	CYCS
CCDC142	CYSTM1
CCDC174	CZIB
CCDC186	DACH1
CCDC25	DAG1
CCDC28B	DAP
CCDC43	DARS1
CCDC47	DARS2
CCDC6	DAZAP1
CCDC71L	DAZAP2
CCDC8	DBF4
CCDC85C	DBI
CCDC86	DBN1
CCDC88A	DCAF10
CCDC93	DCAF12
CCDC97	DCAF16
CCHCR1	DCAF17
CCNA2	DCAF7
CCNB1	DCBLD2
CCNB1IP1	DCK
CCNB2	DCLRE1A
CCNC	DCP1A
CCND1	DCP2
CCND2	DCTD
CCND3	DCTN1
CCNE2	DCTN2
CCNF	DCTN4
CCNG1	DCTN5
CCNI	DCTPP1
CCNJ	DCUN1D1
CCNK	DCUN1D4
CCNL2	DCUN1D5
CCNT1	DDAH1
CCNT2	DDB1
CCNY	DDHD1
CCP110	DDHD2
CCSAP	DDI2
CCT2	DDIAS
CCT3	DDX1
CCT4	DDX17
CCT5	DDX18
CCT6A	DDX21
CCT7	DDX3X
CCT8	DDX5
CD164	DEGS1
CD276	DEK
CD2AP	DENND11
CD2BP2	DENND4A
CD320	DENND4C
CD46	DENND6A
CD59	DENR
CD63	DEPDC1
CD81	DERL1
CD99	DESI1
CD99L2	DESI2
CDAN1	DFFA
CDC123	DGKH
CDC14B	DGUOK
CDC16	DHCR24
CDC20	DHFR
CDC23	DHTKD1
CDC25A	DHX15
CDC25B	DHX29
CDC27	DHX33
CDC34	DHX36
CDC37	DHX40
CDC40	DHX8
CDC42	DHX9
CDC42BPA	DIAPH1
CDC42BPB	DICER1
CDC42EP1	DIMT1
CDC42SE1	DIP2B
CDC42SE2	DIPK1A
CDC45	DIPK2A
CDC5L	DIRAS1
CDC6	DIS3
CDC7	DIXDC1
CDC73	DKC1
CDCA2	DLAT
CDCA4	DLC1
CDCA5	DLD
CDCA7	DLG5
CDCA7L	DMAC2
CDH2	DMXL1
CDH24	DMXL2
CDIP1	DNAAF5
CDK1	DNAJA1
CDK12	DNAJA2
CDK13	DNAJB14
CDK16	DNAJB6
CDK17	DNAJC10
CDK19	DNAJC13
CDK2	DNAJC24
CDK2AP2	DNAJC3
CDK5RAP2	DNAJC7
CDK6	DNAJC8
CDKN1A	DNAJC9
CDKN1B	DNM1L
CDKN2A	DPH3
CDS1	DPP8
CDS2	DR1
CDT1	DSC2
CDV3	DSC3
CDYL	DSE
CEBPA	DSG2
CEBPG	DSP
CEBPZ	DSTN
CECR2	DSTYK
CELF1	DTL
CELSR2	DUSP3
CELSR3	DVL3
CEMIP2	DYM
CENPB	DYNC1H1
CENPE	DYNC1I2
CENPF	DYNC1LI1
CENPO	DYNC1LI2
CENPV	DYNC2H1
CENPX	DYNC2I2
CEP120	DYNC2LI1
CEP170	DYNLL2
CEP170B	DYNLT1
CEP20	DYRK2
CEP250	DYRK3
CEP350	DZIP1
CEP41	DZIP3
CEP44	E2F3
CEP57	E2F5
CEP68	EAF1
CEP85	EBPL
CEP85L	ECHDC1
CEP97	ECPAS
CERCAM	ECT2
CERK	EDEM3
CERS2	EEF1A1
CERS5	EEF1B2
CERS6	EEF2
CERT1	EEF2K
CES2	EFCAB14
CETN2	EFL1
CFAP36	EFR3A
CFAP97	EHBP1
CFL1	EI24
CFL2	EID1
CGGBP1	EID2
CGN	EIF1
CHAF1A	EIF1AX
CHAMP1	EIF1B
CHCHD1	EIF2AK1
CHCHD2	EIF2AK2
CHCHD3	EIF2S1
CHCHD4	EIF2S2
CHCHD7	EIF2S3
CHD1	EIF3A
CHD2	EIF3E
CHD3	EIF3F
CHD6	EIF3H
CHD7	EIF3J
CHD8	EIF3L
CHD9	EIF3M
CHEK1	EIF4A2
CHERP	EIF4B
CHIC1	EIF4E
CHID1	EIF4E2
CHKA	EIF4EBP2
CHM	EIF4G1
CHML	EIF4G2
CHMP1A	EIF4G3
CHMP2A	EIF4H
CHMP2B	EIF5
CHMP3	EIF5A
CHMP4B	EIF5B
CHORDC1	ELAVL1
CHP1	ELAVL2
CHPF2	ELF1
CHPT1	ELK1
CHSY1	ELK4
CHUK	ELOVL2
CIAO1	ELOVL5
CIAO2A	ELOVL6
CIAO2B	ELP1
CIAPIN1	ELP2
CIB1	EMB
CIC	EMC10
CILK1	EMC4
CINP	EML4
CIP2A	EMP2
CIR1	ENAH
CIRBP	ENO1
CISD2	ENOPH1
CIZ1	ENPP4
CKAP2	ENSA
CKAP4	ENTPD7
CKAP5	EP400
CKB	EPAS1
CKS1B	EPB41
CLASP1	EPB41L2
CLASP2	EPB41L3
CLCC1	EPC2
CLCN3	EPRS1
CLCN5	EPS15
CLCN7	ERBIN
CLDN12	ERCC4
CLDND1	ERCC6L
CLEC16A	ERG28
CLGN	ERGIC1
CLIC4	ERGIC2
CLINT1	ERH
CLIP1	ERI1
CLN8	ERI2
CLNS1A	ERLEC1
CLOCK	ERLIN2
CLPB	ERMP1
CLPP	ERO1A
CLPTM1	ERO1B
CLPTM1L	ERP29
CLSPN	ESCO1
CLSTN1	ESD
CLTA	ESYT2
CLTB	ETF1
CLTC	ETFA
CLUH	ETFDH
CMAS	ETFRF1
CMPK1	ETNK1
CMSS1	ETV3
CMTM4	EXD2
CMTM6	EXOC2
CMTR1	EXOC4
CNBP	EXOC5
CNDP2	EXOC6B
CNIH1	EXOC8
CNIH4	EXTL2
CNN2	EYA4
CNN3	F11R
CNNM3	F2R
CNNM4	FADS1
CNOT1	FAF2
CNOT10	FAM102B
CNOT11	FAM104A
CNOT4	FAM107B
CNOT6	FAM120A
CNOT6L	FAM120AOS
CNOT7	FAM122B
CNOT8	FAM126A
CNOT9	FAM126B
CNP	FAM136A
CNPPD1	FAM13B
CNST	FAM160B1
COA1	FAM168B
COA4	FAM169A
COA6	FAM189B
COASY	FAM199X
COCH	FAM20B
COIL	FAM210B
COL18A1	FAM217B
COL2A1	FAM234B
COL4A1	FAM32A
COL4A2	FAM3C
COL4A5	FAM76B
COL4A6	FAM8A1
COL6A1	FAM91A1
COLGALT1	FAM98A
COMMD2	FAM98B
COP1	FANCM
COPA	FAR1
COPB1	FARP2
COPB2	FARSB
COPG1	FASTKD2
COPG2	FBN2
COPRS	FBXL20
COPS3	FBXL3
COPS4	FBXO11
COPS5	FBXO21
COPS6	FBXO22
COPS8	FBXO28
COPS9	FBXO30
COPZ1	FBXO45
COQ10A	FBXW11
COQ7	FBXW2
COQ8B	FCF1
COQ9	FCHO2
CORO1B	FDX1
CORO1C	FECH
COTL1	FEM1B
COX11	FEM1C
COX15	FERMT2
COX4I1	FEZ2
COX5A	FGF2
COX5B	FGFR1OP2
COX6A1	FGFR3
COX6C	FH
COX7A2L	FHL1
COX7B	FIG4
COX7C	FIGN
COX8A	FIGNL1
CPD	FKBP10
CPE	FKBP14
CPEB2	FKBP1A
CPEB4	FKBP3
CPNE3	FKBP4
CPNE8	FKBP5
CPOX	FKBP9
CPSF1	FKTN
CPSF2	FLVCR1
CPSF3	FMR1
CPSF4	FNBP1L
CPSF6	FNDC3A
CPSF7	FNDC3B
CPT1A	FNIP1
CPT2	FNTA
CPVL	FOCAD
CRAMP1	FOXC1
CREB1	FOXJ3
CREB3	FOXK2
CREB3L2	FOXN2
CREB5	FOXO1
CREBBP	FOXO3
CREBL2	FOXRED2
CREBRF	FRA10AC1
CREBZF	FRS2
CREG1	FRYL
CRIM1	FSCN1
CRK	FSTL1
CRKL	FTH1
CRNKL1	FTO
CRTAP	FUBP3
CRTC3	FUCA2
CRYBG3	FUS
CS	FUT8
CSDE1	FYTTD1
CSE1L	G2E3
CSGALNACT2	G3BP1
CSK	G3BP2
CSNK1A1	GAB1
CSNK1D	GABARAPL2
CSNK1E	GABPA
CSNK1G1	GADD45A
CSNK1G2	GALNT1
CSNK1G3	GALNT11
CSNK2A1	GALNT2
CSNK2A2	GALNT7
CSPP1	GANAB
CSRNP2	GAPVD1
CSRP2	GAREM2
CST3	GARRE1
CSTB	GART
CSTF2T	GAS2L3
CSTF3	GATC
CTBP1	GCC2
CTBP2	GCH1
CTCF	GDE1
CTDNEP1	GDI1
CTDSP2	GDI2
CTDSPL	GEN1
CTDSPL2	GFM1
CTIF	GFPT1
CTNNA1	GGA2
CTNNAL1	GGCT
CTNNB1	GGNBP2
CTNNBIP1	GGPS1
CTNNBL1	GHITM
CTPS1	GIGYF2
CTPS2	GINS1
CTR9	GINS2
CTSA	GINS4
CTSB	GJA1
CTSD	GLCCI1
CTTN	GLCE
CTTNBP2NL	GLE1
CTXN1	GLI3
CUEDC2	GLMN
CUL1	GLMP
CUL2	GLO1
CUL3	GLOD4
CUL4A	GLRX5
CUL4B	GLS
CUL5	GLTP
CUL7	GLUD1
CUTA	GLUL
CUX1	GLYR1
CWC15	GM2A
CWC22	GMCL1
CXorf38	GMFB
CXXC1	GMNN
CYB561	GNA13
CYB561D1	GNAI3
CYB5B	GNAQ
CYB5R3	GNAS
CYB5RL	GNB1
CYBA	GNB4
CYBC1	GNE
CYBRD1	GNG12
CYC1	GNG4
CYFIP1	GNL2
CYFIP2	GNPAT
CYHR1	GNPDA1
CYLD	GNPNAT1
CYREN	GNPTAB
CYRIB	GNS
CYTH1	GOLGA3
CYTH2	GOLGA7
CYTH3	GOLGB1
DAB2IP	GOLIM4
DACH1	GOLM1
DAD1	GOLM2
DAG1	GOLPH3
DAP	GOLT1B
DAP3	GOPC
DAPK1	GORASP2
DARS1	GOT2
DARS2	GPATCH2
DAXX	GPATCH8
DAZAP1	GPBP1
DAZAP2	GPBP1L1
DBN1	GPC4
DBNDD1	GPD1L
DBNL	GPD2
DBR1	GPI
DBT	GPN1
DCAF1	GPR107
DCAF10	GPR137B
DCAF11	GPR180
DCAF12	GPR27
DCAF5	GPR63
DCAF6	GPRASP2
DCAF7	GPRC5B
DCAF8	GPRIN3
DCBLD2	GPX3
DCK	GPX4
DCP1A	GPX8
DCP2	GRB2
DCTD	GREB1L
DCTN1	GRPEL1
DCTN2	GRPEL2
DCTN4	GRSF1
DCTN5	GSK3B
DCUN1D4	GSKIP
DCUN1D5	GSPT1
DCXR	GSTCD
DDA1	GTF2A1
DDAH1	GTF2A2
DDB1	GTF2H1
DDHD1	GTF2H3
DDHD2	GTF3A
DDI2	GTF3C2
DDOST	GTF3C4
DDR1	GTPBP4
DDX1	GUF1
DDX10	GXYLT1
DDX17	H1-0
DDX18	H1-10
DDX19A	H2AZ1
DDX20	H2AZ2
DDX21	H3-3A
DDX23	H3-3B
DDX24	HACD2
DDX27	HACD3
DDX39A	HADHA
DDX3X	HAT1
DDX41	HAUS6
DDX42	HBS1L
DDX46	HDAC1
DDX49	HDAC2
DDX5	HDDC2
DDX50	HDGF
DDX52	HDGFL3
DDX54	HEATR1
DDX56	HECA
DEAF1	HECTD1
DEF8	HELZ
DEGS1	HEY1
DEK	HIF1A
DELE1	HIF1AN
DENND11	HIGD1A
DENND4A	HINT1
DENND4B	HINT3
DENND4C	HIP1
DENND5A	HIPK1
DENND5B	HIPK2
DENR	HIPK3
DEPDC1	HIRA
DEPDC1B	HK1
DESI1	HLA-A
DESI2	HLA-B
DGCR2	HLA-C
DGKD	HLA-DPA1
DGKE	HLA-DQB1
DGKH	HLCS
DGKZ	HLTF
DHCR24	HMG20A
DHCR7	HMGA1
DHRS7	HMGA2
DHTKD1	HMGB1
DHX15	HMGB2
DHX16	HMGB3
DHX29	HMGCR
DHX30	HMGCS1
DHX32	HMGN1
DHX33	HMGN2
DHX36	HMGN3
DHX37	HMGN4
DHX38	HMMR
DHX40	HNRNPA0
DHX57	HNRNPA1
DHX8	HNRNPA2B1
DHX9	HNRNPA3
DIAPH1	HNRNPAB
DIAPH3	HNRNPC
DICER1	HNRNPD
DIDO1	HNRNPDL
DIP2B	HNRNPF
DIPK1B	HNRNPH1
DIRAS1	HNRNPH2
DIS3	HNRNPH3
DIS3L	HNRNPK
DIXDC1	HNRNPR
DKC1	HNRNPU
DLAT	HNRNPUL1
DLC1	HNRNPUL2
DLD	HOMER1
DLG1	HOOK1
DLG3	HOOK3
DLG5	HOXA9
DLGAP5	HOXB9
DLST	HOXD13
DMAC2	HP1BP3
DMAP1	HS2ST1
DMPK	HS6ST2
DMWD	HSBP1
DMXL1	HSD17B12
DNA2	HSD17B4
DNAAF5	HSDL1
DNAJA1	HSDL2
DNAJA2	HSF2
DNAJA3	HSP90AA1
DNAJB1	HSP90AB1
DNAJB11	HSP90B1
DNAJB12	HSPA13
DNAJB14	HSPA1B
DNAJB2	HSPA4
DNAJB6	HSPA4L
DNAJC10	HSPA5
DNAJC11	HSPA8
DNAJC13	HSPA9
DNAJC16	HSPD1
DNAJC3	HSPH1
DNAJC5	HTATSF1
DNAJC6	HUWE1
DNAJC7	IARS1
DNAJC8	IARS2
DNASE1	IBTK
DNM1L	ICE1
DNM2	ICE2
DNMBP	ICMT
DNMT1	ID4
DNPEP	IDE
DNTTIP2	IDH1
DOCK1	IDH3A
DOCK7	IDI1
DOK4	IER3IP1
DONSON	IFNAR1
DOT1L	IFNGR1
DPCD	IFRD2
DPF2	IFT52
DPH2	IFT57
DPH3	IFT81
DPP3	IGF2BP1
DPP8	IGF2BP3
DPP9	IGF2R
DPY19L1	IGSF3
DPYSL5	IKZF5
DR1	IL13RA1
DRAP1	IL6ST
DRG1	ILDR2
DROSHA	ILF3
DSC2	ILRUN
DSC3	IMPACT
DSCC1	INA
DSG2	INIP
DSN1	INO80D
DSP	INSIG1
DST	INSIG2
DSTN	INTS13
DSTYK	INTS8
DTL	IPMK
DTNA	IPO11
DTYMK	IPO5
DUS1L	IPO7
DUSP14	IPO8
DUSP16	IPO9
DUSP3	IPP
DUSP7	IQCB1
DUT	IQGAP1
DVL1	IREB2
DVL2	IRF2BP2
DXO	IRS4
DYM	ISCA1
DYNC1H1	ISOC1
DYNC1I2	ISY1
DYNC1LI1	ITCH
DYNC1LI2	ITGB1
DYNC2H1	ITPRID2
DYNC2I2	JADE1
DYNLL2	JADE3
DYNLT1	JAK1
DYNLT3	JAM3
DYRK1A	JCAD
DYRK2	JMJD1C
DYRK3	JMY
DZIP1	JPT1
E2F1	JPT2
E2F2	JUN
E2F3	KAT2B
E2F4	KAT6A
E2F7	KBTBD11
EAF1	KBTBD6
EBNA1BP2	KBTBD7
EBP	KCTD10
ECD	KCTD12
ECE1	KCTD20
ECHDC1	KCTD3
ECHS1	KCTD5
ECI2	KCTD9
ECPAS	KDELR1
ECSIT	KDELR2
ECT2	KDM2A
EDC3	KDM3B
EDC4	KDM5A
EDEM1	KDM5B
EDEM3	KDM7A
EDF1	KDSR
EDRF1	KHDRBS1
EEF1A2	KHSRP
EEF1B2	KIAA0232
EEF1D	KIAA0586
EEF2	KIAA0895
EEFSEC	KIAA1143
EFCAB14	KIAA1191
EFHD2	KIAA1586
EFL1	KIAA1958
EFNB2	KIDINS220
EFR3A	KIF14
EFTUD2	KIF1B
EHBP1	KIF20B
EHD1	KIF21A
EHMT1	KIF2A
EHMT2	KIF3A
EIF1	KIF3B
EIF1AX	KIF4A
EIF2A	KIF5B
EIF2AK1	KIF5C
EIF2AK3	KIT
EIF2B1	KITLG
EIF2B5	KLF10
EIF2D	KLF12
EIF2S1	KLF16
EIF2S2	KLF9
EIF2S3	KLHDC10
EIF3A	KLHDC3
EIF3B	KLHL12
EIF3D	KLHL13
EIF3E	KLHL15
EIF3F	KLHL23
EIF3G	KLHL28
EIF3H	KLHL36
EIF3I	KLHL42
EIF3J	KLHL5
EIF3K	KLHL8
EIF3L	KLHL9
EIF3M	KMT2C
EIF4A2	KMT2D
EIF4B	KMT5A
EIF4E2	KNL1
EIF4EBP1	KNOP1
EIF4EBP2	KNTC1
EIF4ENIF1	KPNA1
EIF4G1	KPNA2
EIF4G2	KPNA3
EIF4G3	KPNA4
EIF4H	KPNA5
EIF5	KPNB1
EIF5A	KRAS
EIF5B	KRR1
ELAC2	KTN1
ELAVL1	KXD1
ELF1	KYAT3
ELF2	LAMC1
ELF4	LAMP1
ELK1	LAMP2
ELK4	LAMTOR1
ELL	LAMTOR3
ELL2	LAMTOR5
ELMOD2	LANCL1
ELOA	LAPTM4A
ELOC	LAPTM4B
ELOVL4	LARP4
ELOVL5	LARP4B
ELOVL6	LARP7
ELP1	LARS1
ELP2	LARS2
ELP3	LATS1
ELP5	LBR
EMB	LCOR
EMC10	LCORL
EMC3	LDHA
EMD	LDHB
EME2	LEMD3
EML4	LEPROT
EMP2	LEPROTL1
EN2	LETMD1
ENAH	LGALSL
ENDOD1	LGR4
ENO1	LIMA1
ENOPH1	LIMS1
ENPP4	LIN28B
ENSA	LIN54
ENTPD4	LIN7A
ENTPD6	LIN9
ENTR1	LIPA
EP300	LITAF
EP400	LIX1L
EPAS1	LMAN1
EPB41	LMAN2
EPB41L2	LMBR1
EPB41L3	LMNB1
EPB41L5	LMNB2
EPC2	LMO4
EPDR1	LNPEP
EPHA7	LONP2
EPHB4	LPCAT1
EPHX1	LPGAT1
EPN1	LRATD2
EPN2	LRBA
EPRS1	LRP6
EPS15	LRP8
ERAL1	LRPPRC
ERBB2	LRRC58
ERBIN	LRRC59
ERC1	LRRC8B
ERCC6	LRRC8C
ERCC6L	LRRFIP1
ERF	LSM11
ERG28	LSM14A
ERGIC1	LSM3
ERGIC3	LSM4
ERI1	LSM5
ERI2	LSM6
ERI3	LTA4H
ERLEC1	LTN1
ERLIN2	LUC7L2
ERMP1	LUZP1
ERO1A	LYN
ERO1B	LYPLA1
ERP29	LYRM1
ERP44	LYRM2
ERRFI1	LYSMD3
ESCO1	LYST
ESF1	LZIC
ESPL1	M6PR
ESRRA	MACIR
ESYT1	MACROH2A1
ESYT2	MAD2L1
ETF1	MAFG
ETFA	MAGED1
ETFDH	MAGEF1
ETNK1	MAGI1
ETV3	MAGT1
EVI5L	MAML1
EVL	MAN1A1
EWSR1	MAN1A2
EXD2	MAN2A1
EXO1	MAP1B
EXOC2	MAP1LC3B
EXOC4	MAP2K1
EXOC5	MAP2K4
EXOC6	MAP3K13
EXOC7	MAP3K2
EXOC8	MAP3K20
EXOSC10	MAP3K21
EXOSC9	MAP4
EXT2	MAP4K4
EXTL3	MAP4K5
EYA3	MAP7
EYA4	MAP7D2
EZH2	MAP9
EZR	MAPK1
F11R	MAPK14
F2R	MAPK1IP1L
FAAP100	MAPK6
FAAP20	MAPK8
FADS1	MAPK9
FADS2	MAPRE1
FAF1	MAPRE2
FAF2	MARCHF6
FAM102B	MARCHF7
FAM104A	MARCKS
FAM107B	MARCKSL1
FAM120A	MARS1
FAM120AOS	MAT2B
FAM120B	MATR3
FAM122B	MAVS
FAM126A	MAX
FAM126B	MAZ
FAM135A	MBNL1
FAM136A	MBNL2
FAM13B	MBOAT2
FAM155B	MBTPS1
FAM160B1	MBTPS2
FAM168A	MCCC2
FAM168B	MCFD2
FAM169A	MCL1
FAM171A1	MCM4
FAM189B	MCM6
FAM193A	MCTS1
FAM199X	MCU
FAM20B	MCUR1
FAM210B	MDM2
FAM217B	MDN1
FAM219A	ME1
FAM219B	ME2
FAM229B	MEAF6
FAM234A	MECP2
FAM32A	MED1
FAM3C	MED13
FAM50A	MED14
FAM53B	MED23
FAM53C	MED28
FAM83H	MED4
FAM8A1	MEF2A
FAM91A1	MEGF8
FAM98A	MEGF9
FAM98B	MELK
FANCD2	MESD
FANCI	MET
FAR1	METAP2
FARP1	METTL14
FARP2	METTL16
FARSA	METTL21A
FASN	METTL5
FASTK	METTL7A
FASTKD1	METTL9
FASTKD5	MEX3A
FAT1	MEX3C
FAU	MFAP3
FBH1	MFN2
FBL	MFSD1
FBN2	MFSD14B
FBRS	MGA
FBRSL1	MGAT2
FBXL18	MGAT5
FBXL19	MGME1
FBXL3	MIB1
FBXL5	MICU1
FBXO11	MID1
FBXO21	MIEF1
FBXO22	MIEN1
FBXO28	MIER1
FBXO30	MIER3
FBXO33	MIGA1
FBXO34	MINPP1
FBXO45	MIS12
FBXO5	MIS18A
FBXO7	MKKS
FBXO9	MKLN1
FBXW11	MKRN1
FBXW2	MKRN2
FBXW4	MLEC
FCHO2	MLF2
FDFT1	MLLT11
FDPS	MMADHC
FDXR	MMGT1
FECH	MMP24OS
FEM1A	MMS22L
FEM1B	MOB1A
FEN1	MOB1B
FERMT2	MOB4
FGD1	MOCS2
FGF2	MORC3
FGFR3	MORF4L1
FGFRL1	MORF4L2
FH	MORN4
FHL1	MOSPD1
FHOD1	MPC1
FIG4	MPDU1
FIGN	MPDZ
FIGNL1	MPHOSPH6
FIP1L1	MPI
FKBP10	MPLKIP
FKBP14	MPP5
FKBP1A	MPP6
FKBP3	MPRIP
FKBP4	MPZL1
FKBP5	MR1
FKBP8	MRE11
FKBP9	MRFAP1
FKTN	MRFAP1L1
FLII	MRGBP
FLNA	MRPL19
FLNB	MRPL3
FLNC	MRPL30
FLOT1	MRPL35
FLT4	MRPL42
FLVCR1	MRPL49
FLYWCH1	MRPS10
FMNL2	MRPS16
FMR1	MRPS23
FNBP1	MRPS27
FNBP1L	MRS2
FNBP4	MRTFB
FNDC10	MSANTD4
FNDC3A	MSH2
FNDC3B	MSH6
FNIP2	MSI2
FOCAD	MSMO1
FOXC1	MSN
FOXF2	MTAP
FOXJ2	MTCH1
FOXJ3	MTCH2
FOXK1	MTDH
FOXK2	MTF2
FOXM1	MTFR1
FOXN2	MTHFD2
FOXN3	MTMR1
FOXO3	MTMR12
FOXO4	MTMR2
FRAS1	MTMR9
FRMD6	MTOR
FRS2	MTPN
FRYL	MTR
FSCN1	MTREX
FSTL1	MTX3
FTH1	MXI1
FTO	MXRA7
FTSJ3	MYCBP
FUBP1	MYCBP2
FUBP3	MYH10
FUCA2	MYH9
FUNDC2	MYL6
FURIN	MYO1B
FUS	MYO6
FUZ	MYO9A
FXR1	MZT1
FXR2	N4BP2L2
FYCO1	NAA15
FYN	NAA20
FYTTD1	NAA25
FZD5	NAA30
FZD6	NAA35
FZD7	NAA50
G2E3	NAB1
G3BP1	NACA
G3BP2	NACC2
GAB2	NAE1
GABARAPL2	NAP1L1
GABPA	NAP1L4
GADD45A	NAPG
GAL	NARS1
GALE	NBN
GALNT1	NBR1
GALNT11	NCAPG2
GALNT2	NCBP1
GANAB	NCBP2
GAPDH	NCKAP1
GAPVD1	NCL
GAR1	NCOA2
GAREM1	NCOA3
GAREM2	NCOA4
GARRE1	NCOA6
GARS1	NCOA7
GART	NDC1
GAS2L3	NDFIP1
GATAD1	NDFIP2
GATAD2A	NDST1
GATAD2B	NDUFA12
GATC	NDUFA5
GATD1	NDUFB2
GBA2	NDUFB5
GBE1	NECAP1
GBF1	NEDD1
GCC1	NEDD4
GCC2	NEFL
GCH1	NEK1
GCN1	NEK7
GDE1	NEK9
GDF11	NEMF
GDI1	NEMP1
GDI2	NEPRO
GEMIN4	NET1
GET1	NETO2
GFM2	NEU3
GFPT1	NF1
GGA2	NFAT5
GGH	NFYA
GGNBP2	NHLRC2
GHITM	NID1
GID4	NIFK
GID8	NIN
GIGYF1	NIP7
GIGYF2	NIPA1
GINS2	NIPA2
GIPC1	NIPBL
GIT1	NIPSNAP1
GIT2	NIPSNAP2
GLA	NKAPD1
GLB1	NKIRAS2
GLCE	NKRF
GLE1	NMD3
GLI3	NME4
GLO1	NNT
GLOD4	NOC3L
GLS	NOL11
GLTP	NOLC1
GLUD1	NONO
GLUL	NOP58
GLYR1	NOTCH2
GM2A	NPEPPS
GMCL1	NPM1
GMEB1	NPNT
GMEB2	NPTN
GMFB	NPTX1
GMNN	NR1D2
GMPR2	NR3C1
GMPS	NRARP
GNA11	NRAS
GNA13	NRCAM
GNAI1	NRIP1
GNAI2	NRM
GNAI3	NRN1
GNAQ	NSA2
GNB1	NSD1
GNB2	NSD2
GNB4	NSD3
GNG12	NSL1
GNG4	NSMCE2
GNL2	NT5C2
GNL3	NUB1
GNPAT	NUCB2
GNPDA1	NUCKS1
GNPNAT1	NUDT11
GNPTAB	NUDT12
GNS	NUDT15
GOLGA2	NUDT19
GOLGA3	NUDT21
GOLGA4	NUDT4
GOLGB1	NUDT5
GOLIM4	NUFIP2
GOLM1	NUP133
GOLM2	NUP153
GOLPH3	NUP160
GOLPH3L	NUP205
GON4L	NUP210
GOPC	NUP43
GORASP1	NUP50
GOSR1	NUP54
GOT2	NUP58
GPAA1	NUP98
GPAM	NUS1
GPAT4	NUTF2
GPATCH1	NXPE3
GPATCH11	OARD1
GPATCH2	OAT
GPATCH2L	OAZ1
GPATCH4	OAZ2
GPATCH8	OBI1
GPBP1	OCRL
GPBP1L1	ODC1
GPC4	ODR4
GPD1L	OGA
GPD2	OGDH
GPI	OIP5
GPN1	OLA1
GPN3	ONECUT2
GPR107	OPA1
GPR137	ORC3
GPR153	ORC6
GPR161	ORMDL1
GPR180	OS9
GPR27	OSBP
GPRASP2	OSBPL8
GPRIN1	OSGIN2
GPS1	OST4
GPX1	OSTC
GPX3	OSTM1
GPX4	OTUB1
GRAMD4	OTUD4
GRB10	OTULIN
GRB2	OXA1L
GREB1L	OXCT1
GRHPR	OXR1
GRINA	OXSR1
GRK2	P2RY1
GRK3	PA2G4
GRK6	PABPC1
GRN	PABPC4L
GRPEL2	PACC1
GRSF1	PACSIN2
GSE1	PAFAH1B1
GSK3A	PAFAH1B2
GSK3B	PAICS
GSKIP	PAIP2
GSPT1	PAIP2B
GSTA4	PAK1
GSTO1	PAK2
GSTP1	PALLD
GTF2A1	PALM2AKAP2
GTF2B	PAM
GTF2E2	PAN3
GTF2F1	PANK3
GTF2H1	PAPOLA
GTF2I	PAPSS1
GTF3A	PAQR3
GTF3C1	PARM1
GTF3C2	PARN
GTF3C3	PARP4
GTF3C4	PARPBP
GTF3C5	PATL1
GTPBP1	PAWR
GTPBP3	PBK
GTPBP4	PBRM1
GTPBP8	PBX1
GTSE1	PCBD1
GUCD1	PCBP2
GUK1	PCGF3
GUSB	PCGF5
GXYLT1	PCGF6
GYG1	PCLAF
GYS1	PCM1
GZF1	PCMT1
H1-0	PCMTD2
H1-10	PCNP
H2AZ2	PCNX1
H2BC12	PCNX4
H3-3A	PCYOX1
H3-3B	PDCD10
HACD2	PDCD11
HACD3	PDCD2
HADH	PDCD4
HADHA	PDCD6IP
HADHB	PDCL
HAGH	PDE12
HAUS6	PDE7A
HAX1	PDHB
HBP1	PDHX
HBS1L	PDIA3
HCFC1	PDIA6
HDAC1	PDIK1L
HDAC2	PDK3
HDAC3	PDLIM1
HDAC5	PDLIM5
HDAC6	PDP2
HDDC2	PDPN
HDGF	PDPR
HDGFL2	PDS5A
HDGFL3	PDS5B
HDHD5	PDXDC1
HDLBP	PDZD11
HEATR1	PDZD8
HEATR5B	PEA15
HEATR6	PEAK1
HECA	PEBP1
HECTD1	PERP
HECTD4	PEX13
HELLS	PEX19
HELZ	PFN1
HERC1	PFN2
HERC2	PGAM1
HERC4	PGAM5
HERC5	PGD
HES4	PGK1
HES6	PGM2
HEXIM1	PGM3
HEY1	PGRMC1
HGS	PGRMC2
HIBADH	PHACTR2
HIC2	PHACTR4
HIF1A	PHB2
HIF1AN	PHC3
HIGD1A	PHF10
HIGD2A	PHF14
HINT1	PHF20
HINT3	PHF6
HIPK1	PHF8
HIPK2	PHIP
HIPK3	PHKA1
HIRIP3	PHKB
HK1	PHLPP2
HK2	PHTF1
HLA-A	PHTF2
HLA-B	PI4K2B
HLA-C	PICALM
HLCS	PIGA
HLTF	PIGK
HMBS	PIGW
HMCES	PIGX
HMG20A	PIK3C2A
HMGA1	PIK3R1
HMGB1	PIK3R4
HMGB2	PIKFYVE
HMGB3	PIP4K2B
HMGCL	PIP5K1A
HMGCR	PITPNA
HMGCS1	PITPNB
HMGN1	PJA1
HMGN2	PJA2
HMGN4	PKM
HMGXB3	PKN2
HMGXB4	PLAG1
HMMR	PLEKHA1
HMX1	PLEKHB2
HNRNPA0	PLEKHF2
HNRNPA1	PLEKHM3
HNRNPA2B1	PLOD2
HNRNPA3	PLS1
HNRNPAB	PLS3
HNRNPC	PM20D2
HNRNPD	PMAIP1
HNRNPDL	PMS1
HNRNPF	PNISR
HNRNPH1	PNMA1
HNRNPH2	PNMA8A
HNRNPH3	PNPLA8
HNRNPK	PNPT1
HNRNPL	PNRC2
HNRNPM	POC1B
HNRNPR	POFUT1
HNRNPU	POGK
HNRNPUL1	POGLUT3
HNRNPUL2	POLA1
HOMER1	POLE3
HOMER2	POLK
HOOK1	POLR1A
HOXA10	POLR1B
HOXA11	POLR1D
HOXA5	POLR1F
HOXA9	POLR2A
HOXB13	POLR2B
HOXB3	POLR2C
HOXB7	POLR2D
HOXB9	POLR2K
HOXC10	POLR3A
HOXD13	POLR3B
HP1BP3	POLR3G
HPRT1	POLR3GL
HPS1	POM121
HPS3	POMK
HPS4	POU2F1
HPS5	POU3F2
HRAS	POU4F1
HS1BP3	PPA1
HS2ST1	PPA2
HS6ST2	PPAT
HSBP1	PPFIA1
HSD17B10	PPIA
HSD17B12	PPID
HSD17B4	PPIF
HSDL1	PPIG
HSDL2	PPIL1
HSF1	PPIL4
HSF2	PPM1A
HSP90AA1	PPM1B
HSP90AB1	PPM1E
HSP90B1	PPM1F
HSPA13	PPM1K
HSPA4	PPM1L
HSPA4L	PPP1CB
HSPA5	PPP1CC
HSPA8	PPP1R10
HSPA9	PPP1R12A
HSPB1	PPP1R14B
HSPB11	PPP1R14C
HSPBP1	PPP1R15B
HSPD1	PPP1R2
HSPH1	PPP2CA
HTATSF1	PPP2CB
HTRA2	PPP2R1A
HTT	PPP2R1B
HUWE1	PPP2R2A
HYOU1	PPP2R5C
IARS1	PPP2R5D
IARS2	PPP2R5E
IBA57	PPP3CA
IBTK	PPP3R1
ICE1	PPP4R2
ICMT	PPP4R3B
ID3	PPP6C
ID4	PPP6R3
IDE	PPT1
IDH2	PPTC7
IDH3A	PRCP
IDH3B	PRDM2
IDI1	PRDX1
IER2	PRDX3
IER5	PRDX6
IFFO1	PRELID1
IFFO2	PRELID3B
IFNAR1	PREPL
IFNGR2	PRIM2
IFRD2	PRKAA1
IGBP1	PRKAA2
IGF1R	PRKACA
IGF2BP1	PRKACB
IGF2BP3	PRKAG1
IGF2R	PRKAR1A
IGFBP2	PRKAR2A
IGSF3	PRKCI
IGSF8	PRKD3
IGSF9B	PRKDC
IK	PRKX
IKZF5	PRMT3
IL13RA1	PRMT6
IL6ST	PRMT7
ILDR2	PRNP
ILF2	PROS1
ILF3	PROSER1
ILRUN	PRPF38A
IMMT	PRPF40A
IMPDH1	PRPF8
IMPDH2	PRPS1
INA	PRPS2
INCENP	PRPSAP2
ING3	PRRC1
ING5	PRRC2A
INO80D	PRRC2C
INO80E	PRRG1
INPP4A	PRSS12
INPPL1	PRTG
INSIG1	PRUNE1
INSR	PRXL2A
INTS1	PSAP
INTS10	PSAT1
INTS11	PSD3
INTS12	PSEN1
INTS13	PSIP1
INTS2	PSMA1
INTS3	PSMA4
INTS7	PSMB5
INTS8	PSMD1
IP6K1	PSMD10
IP6K2	PSMD11
IPMK	PSMD12
IPO11	PSME3
IPO13	PSME4
IPO5	PSMF1
IPO7	PSTPIP2
IPO8	PTAR1
IPO9	PTBP1
IQCB1	PTBP3
IQGAP1	PTDSS1
IQSEC1	PTER
IRAK1	PTGES3
IREB2	PTGFRN
IRF2BP2	PTK2
IRGQ	PTMA
IRS4	PTP4A2
ISG20L2	PTPN1
ISL2	PTPN11
ISYNA1	PTTG1IP
ITCH	PUM2
ITFG1	PURA
ITFG2	PURB
ITGA6	PUS7
ITGAV	PYGB
ITGB1	PYGL
ITGB1BP1	QKI
ITM2B	QPCT
ITM2C	QPRT
ITPK1	QSER1
ITPR3	QTRT2
ITPRID2	R3HDM1
ITPRIPL2	RAB10
ITSN1	RAB11A
ITSN2	RAB11FIP1
IVD	RAB11FIP2
IVNS1ABP	RAB12
JADE1	RAB14
JADE3	RAB18
JAGN1	RAB1A
JAK1	RAB1B
JAM3	RAB21
JARID2	RAB23
JCAD	RAB29
JMJD1C	RAB2A
JMJD6	RAB2B
JMY	RAB31
JOSD1	RAB33B
JPT2	RAB3GAP1
JRK	RAB3GAP2
JUN	RAB4A
JUND	RAB5A
JUP	RAB5B
KANK2	RAB5C
KANSL3	RAB6A
KARS1	RAB7A
KAT6A	RABEP1
KAT6B	RABGAP1
KAT7	RABGAP1L
[truncated: 3,017 more rows]

## Sheet: Sheet 4
LSM14A-TRIBE-ID 15min	LSM14A-TRIBE-ID 30min	LSM14A-TRIBE-ID 60min	LSM14A-TRIBE-ID 120min
AATF	AAGAB	AAGAB	AACS
AEN	AARS1	AAR2	AAGAB
AKAP12	AARS2	AARS1	AAMP
AMD1	AATF	AARS2	AAR2
AMOT	ABL1	AATF	AARS1
ANKRD17	ABL2	ABCB10	AARS2
ANKRD52	ABLIM1	ABCC1	AASDHPPT
BAZ1A	ABR	ABCC4	AASS
BAZ1B	ACACA	ABCE1	AATF
BCOR	ACAT2	ABCF1	ABCA2
CALU	ACIN1	ABHD2	ABCB10
CAPRIN1	ACLY	ABL1	ABCB7
CBX5	ACTG1	ABL2	ABCC1
CCT3	ACTN4	ABLIM1	ABCC4
CCT7	ACTR1B	ABR	ABCC5
CCT8	ACVR2B	ABTB2	ABCE1
CD2BP2	ADAR	AC069544.1	ABCF1
CKB	ADCY1	ACACA	ABCF2
CNOT1	ADCY6	ACAT2	ABHD12
CPSF7	ADD2	ACER3	ABHD2
DDX18	ADH5	ACIN1	ABI1
DDX21	ADIPOR2	ACLY	ABI2
DDX3X	ADNP2	ACO2	ABL1
DHX36	AEN	ACP1	ABL2
DIS3	AFDN	ACSL1	ABLIM1
DYNC1H1	AFG3L2	ACSL3	ABR
EIF4B	AGL	ACSS1	ABTB2
EIF4G2	AGO1	ACTB	AC069544.1
EPRS1	AGO2	ACTG1	ACAA2
EXOSC10	AGPS	ACTN1	ACACA
FAM199X	AHNAK	ACTN4	ACAD9
FASN	AK2	ACTR1A	ACADM
FUBP1	AK4	ACTR1B	ACADVL
G3BP1	AKAP12	ACTR2	ACAT1
G3BP2	AKAP13	ACTR3	ACAT2
GART	AKIRIN1	ACVR2B	ACIN1
GCN1	ALDH3A2	ADAM15	ACLY
HEATR1	AMD1	ADAR	ACO1
HIPK2	AMER1	ADARB1	ACO2
HNRNPK	AMMECR1	ADCK2	ACOT7
HNRNPU	AMOT	ADCY1	ACOT9
HUWE1	AMOTL1	ADCY6	ACOX1
IARS1	ANK3	ADD1	ACP1
IFRD2	ANKLE2	ADD2	ACSL1
IGF2BP1	ANKRD17	ADD3	ACSL3
ILF3	ANKRD28	ADGRL2	ACSS1
IMPDH2	ANKRD52	ADH5	ACTB
INCENP	ANKS1A	ADIPOR2	ACTG1
IPO5	ANLN	ADNP	ACTN1
IREB2	ANP32A	ADNP2	ACTN4
IRS4	AP1G1	ADSS2	ACTR1A
KDM1A	APBB1	AEN	ACTR1B
KIAA0100	APLP2	AFDN	ACTR2
KLHL9	ARAP1	AFF4	ACTR3
KPNB1	AREL1	AFG3L2	ACVR2B
LBR	ARF1	AGAP1	ADAM15
LRPPRC	ARF6	AGAP3	ADAM22
MATR3	ARFGEF2	AGK	ADAM9
MCM3AP	ARHGAP35	AGL	ADAR
MCM6	ARID1A	AGO1	ADARB1
MDN1	ARID1B	AGO2	ADCK2
MRPL9	ARID3B	AGPAT3	ADCY1
MSH2	ARL6IP1	AGPAT5	ADCY3
NCAPD2	ARMT1	AGPS	ADCY6
NOP58	ARNT	AGRN	ADCY9
NSD1	ARPC2	AGTPBP1	ADD1
NUDT21	ARPP19	AHCTF1	ADD2
NUMA1	ASCC3	AHCY	ADD3
NUP205	ASH1L	AHNAK	ADGRA3
OBI1	ASPM	AIF1L	ADGRL1
OGA	ATF4	AIFM1	ADGRL2
PEF1	ATG4D	AK2	ADH5
POLDIP3	ATP1A1	AK4	ADI1
PPIG	ATP2A2	AK6	ADIPOR1
PPP1R8	ATP2B1	AKAP1	ADIPOR2
PRKDC	ATP2B4	AKAP11	ADNP
PRPF8	ATP5F1B	AKAP12	ADNP2
PRRC2A	ATP6V1A	AKAP13	ADPRS
PRRC2C	ATP6V1B2	AKAP8L	ADRM1
PUM2	ATP7B	AKIRIN1	ADSS2
RAB3GAP1	ATR	AKT2	AEN
RANBP2	ATXN1L	AKT3	AFAP1
RBM26	ATXN7L3	ALCAM	AFDN
RIF1	ATXN7L3B	ALDH18A1	AFF1
RIOK3	BAG5	ALDH1A2	AFF4
RNF40	BAHCC1	ALDH1B1	AFG3L2
SACS	BAHD1	ALDH1L2	AGAP1
SET	BAP1	ALDH3A2	AGAP3
SFPQ	BAZ1A	ALDH7A1	AGBL5
SLC38A1	BAZ1B	ALG13	AGFG1
SMARCA1	BAZ2A	ALKBH5	AGK
SMC3	BBX	ALS2	AGL
SMC4	BCAS2	AMBRA1	AGO1
SNRNP200	BCOR	AMD1	AGO2
SON	BCORL1	AMER1	AGPAT1
SP1	BCR	AMFR	AGPAT3
SPEN	BFAR	AMMECR1	AGPAT5
SRSF7	BIRC5	AMOT	AGPS
SZRD1	BIRC6	AMOTL1	AGRN
TAOK1	BMI1	ANAPC1	AGTPBP1
TCOF1	BMS1	ANAPC13	AHCTF1
THOC2	BOD1L1	ANAPC2	AHCY
THRAP3	BPTF	ANAPC5	AHCYL1
TKT	BRD2	ANGEL1	AHCYL2
TLN1	BRD3	ANK3	AHNAK
TOMM70	BRD7	ANKFY1	AIDA
TOP2A	BRI3BP	ANKLE2	AIF1L
TOPORS	BRWD3	ANKRD11	AIFM1
TRA2B	BTAF1	ANKRD13C	AK2
USP22	BZW1	ANKRD17	AK4
USP9X	C11orf58	ANKRD27	AK6
XPO1	C11orf95	ANKRD28	AKAP1
ZFYVE16	C16orf72	ANKRD40	AKAP11
ZNF146	C4orf3	ANKRD50	AKAP12
ZNF282	C8orf33	ANKRD52	AKAP13
ZNF638	CABIN1	ANKS1A	AKAP8
	CAD	ANKS6	AKAP8L
	CALM1	ANLN	AKIRIN1
	CALU	ANO6	AKIRIN2
	CAMKK2	ANP32A	AKR1A1
	CAMSAP2	ANTXR1	AKR1B1
	CAND1	ANXA2	AKT1
	CAPRIN1	ANXA6	AKT2
	CAPZA1	ANXA7	AKT3
	CAST	AP1B1	ALCAM
	CBL	AP1G1	ALDH16A1
	CBX1	AP1M1	ALDH18A1
	CBX2	AP2A1	ALDH1A2
	CBX5	AP2B1	ALDH1B1
	CBX6	AP3B1	ALDH1L2
	CCAR2	AP3D1	ALDH3A2
	CCDC117	AP3M1	ALDH4A1
	CCNA2	AP3S2	ALDH5A1
	CCND2	APAF1	ALDH7A1
	CCNF	APBB1	ALDH9A1
	CCNG1	APEX1	ALG1
	CCNJ	API5	ALG12
	CCNT1	APLP2	ALG13
	CCT2	APMAP	ALKBH4
	CCT3	APP	ALKBH5
	CCT6A	APPBP2	ALMS1
	CCT7	APPL1	ALS2
	CCT8	AQR	AMBRA1
	CD164	ARAP1	AMD1
	CD2AP	ARCN1	AMER1
	CD2BP2	AREL1	AMFR
	CD99L2	ARF1	AMMECR1
	CDC25A	ARF3	AMOT
	CDC37	ARF6	AMOTL1
	CDC42BPA	ARFGAP1	AMPD2
	CDC42BPB	ARFGAP2	AMZ2
	CDC5L	ARFGEF2	ANAPC1
	CDC6	ARFIP2	ANAPC13
	CDCA2	ARHGAP11A	ANAPC2
	CDCA5	ARHGAP17	ANAPC5
	CDIP1	ARHGAP19	ANGEL1
	CDK1	ARHGAP21	ANGEL2
	CDK13	ARHGAP35	ANK2
	CDK2	ARHGAP5	ANK3
	CDK5RAP2	ARHGEF1	ANKFY1
	CDK6	ARHGEF11	ANKH
	CDT1	ARHGEF12	ANKLE2
	CDV3	ARHGEF18	ANKRD11
	CEBPZ	ARHGEF2	ANKRD13B
	CELF1	ARID1A	ANKRD17
	CENPF	ARID1B	ANKRD27
	CEP170	ARID3B	ANKRD28
	CEP250	ARIH1	ANKRD40
	CEP350	ARIH2	ANKRD50
	CERS2	ARL10	ANKRD52
	CHAF1A	ARL5B	ANKS1A
	CHCHD3	ARL6IP1	ANKS6
	CHD2	ARL8B	ANLN
	CHD3	ARMCX3	ANO6
	CHD8	ARMCX5	ANP32A
	CHSY1	ARMH3	ANP32B
	CHUK	ARMT1	ANTXR1
	CKAP2	ARNT	ANXA2
	CKB	ARPC2	ANXA6
	CLDN12	ARPC5	AP1B1
	CLNS1A	ARPC5L	AP1G1
	CLSTN1	ARPP19	AP1G2
	CLTC	ARRB2	AP1M1
	CMTR1	ASB7	AP2A1
	CNBP	ASCC3	AP2A2
	CNOT1	ASH1L	AP2B1
	CNOT10	ASNSD1	AP2S1
	CNOT6	ASPM	AP3B1
	CNOT8	ASXL1	AP3D1
	CNP	ASXL2	AP3M1
	COIL	ATAD2	AP3S2
	COL2A1	ATAD3A	AP5M1
	COPA	ATF3	APAF1
	COPB1	ATF4	APBB1
	COPB2	ATG13	APEH
	COPG2	ATG4D	APEX1
	COPS3	ATG9A	APH1A
	COPZ1	ATIC	API5
	CORO1C	ATMIN	APLP2
	COX7C	ATP13A1	APMAP
	CPSF3	ATP13A2	APP
	CPSF6	ATP13A3	APPBP2
	CPSF7	ATP1A1	APPL1
	CREG1	ATP2A2	AQR
	CRKL	ATP2B1	ARAP1
	CS	ATP2B4	ARCN1
	CSNK1A1	ATP2C1	AREL1
	CSNK1D	ATP5F1A	ARF1
	CSTF3	ATP5F1B	ARF3
	CTNNA1	ATP5MC2	ARF5
	CTNNB1	ATP5PB	ARF6
	CTPS1	ATP6V0A1	ARFGAP1
	CTR9	ATP6V0E2	ARFGAP2
	CUL1	ATP6V1A	ARFGEF2
	CUL2	ATP6V1B2	ARFIP1
	CUL4A	ATP6V1C1	ARFIP2
	CUL4B	ATP7A	ARHGAP11A
	CYFIP2	ATP7B	ARHGAP17
	DARS1	ATP8B2	ARHGAP19
	DCAF1	ATP9A	ARHGAP21
	DCAF7	ATPAF1	ARHGAP35
	DCP1A	ATR	ARHGAP5
	DCP2	ATRN	ARHGDIA
	DCTN1	ATRX	ARHGEF1
	DCTN4	ATXN1L	ARHGEF11
	DCTN5	ATXN7L3	ARHGEF12
	DCUN1D5	ATXN7L3B	ARHGEF18
	DDX18	AURKAIP1	ARHGEF2
	DDX21	AVL9	ARHGEF39
	DDX23	AXIN1	ARHGEF6
	DDX24	B3GALNT2	ARHGEF7
	DDX27	B4GALNT3	ARID1A
	DDX3X	BACH1	ARID1B
	DDX42	BAG3	ARID3A
	DDX46	BAG5	ARID3B
	DEAF1	BAG6	ARID4B
	DENND11	BAHCC1	ARIH1
	DENND4B	BAHD1	ARIH2
	DGKZ	BAK1	ARL1
	DHCR24	BANF1	ARL10
	DHX15	BAP1	ARL2BP
	DHX30	BAZ1A	ARL5B
	DHX33	BAZ1B	ARL6IP1
	DHX34	BAZ2A	ARMC6
	DHX36	BBS4	ARMCX3
	DHX57	BBX	ARMCX5
	DHX9	BCAP31	ARMT1
	DIAPH1	BCAS2	ARNT
	DIP2B	BCL2L13	ARNT2
	DIS3	BCL7B	ARPC1A
	DLD	BCLAF1	ARPC2
	DLG5	BCOR	ARPC3
	DNAJA1	BCORL1	ARPC4
	DNAJB1	BCR	ARPC5
	DNAJC10	BDP1	ARPC5L
	DNAJC5	BET1L	ARPP19
	DNM1L	BFAR	ARRB2
	DNMT1	BICD2	ASAP1
	DNTTIP2	BIRC5	ASCC2
	DONSON	BIRC6	ASCC3
	DOT1L	BLM	ASH1L
	DPP9	BLMH	ASIC1
	DSP	BLOC1S6	ASNSD1
	DTL	BMI1	ASPM
	DYM	BMP7	ASXL1
	DYNC1H1	BMPR2	ASXL2
	DYNC1I2	BMS1	ATAD2
	DYNC1LI2	BOD1	ATAD3A
	DYNC2H1	BOD1L1	ATAD3B
	DYNLL2	BOP1	ATF3
	E2F3	BPNT2	ATF4
	E2F4	BPTF	ATF5
	EAF1	BRAT1	ATF6
	ECPAS	BRCA1	ATF6B
	ECT2	BRD2	ATF7IP
	EDC3	BRD3	ATG13
	EDC4	BRD4	ATG2A
	EEF2	BRD7	ATG4A
	EIF2AK2	BRD8	ATG4B
	EIF2S3	BRD9	ATG4D
	EIF3A	BRF1	ATG7
	EIF3B	BRI3BP	ATG9A
	EIF3D	BRPF3	ATIC
	EIF3F	BRWD1	ATL3
	EIF4B	BRWD3	ATM
	EIF4G1	BTAF1	ATN1
	EIF4G2	BTBD1	ATP11A
	EIF4G3	BTBD3	ATP11C
	EIF4H	BTBD7	ATP13A1
	EIF5	BTRC	ATP13A2
	ELOA	BZW1	ATP13A3
	ELP2	BZW2	ATP1A1
	EML4	C11orf58	ATP1B3
	ENAH	C11orf95	ATP2A2
	ENSA	C12orf43	ATP2B1
	EP400	C14orf132	ATP2B4
	EPB41	C15orf39	ATP2C1
	EPB41L2	C16orf72	ATP5F1A
	EPRS1	C19orf25	ATP5F1B
	ERBB2	C1orf198	ATP5F1E
	ERC1	C1orf21	ATP5MC2
	ESPL1	C1orf35	ATP5MC3
	ESRRA	C1orf43	ATP5ME
	ESYT1	C1QBP	ATP5MF
	ETF1	C20orf27	ATP5PB
	ETNK1	C4orf3	ATP5PD
	EWSR1	C5orf51	ATP5PF
	EXO1	C6orf62	ATP6AP2
	EXOC2	C6orf89	ATP6V0A1
	EXOSC10	C7orf50	ATP6V0D1
	EXOSC9	C8orf33	ATP6V0E2
	EXTL3	CABIN1	ATP6V1A
	EYA3	CABLES1	ATP6V1B2
	EZH2	CACTIN	ATP6V1C1
	FAF2	CACUL1	ATP6V1D
	FAM120A	CAD	ATP7A
	FAM136A	CALD1	ATP7B
	FAM168A	CALM1	ATP8B2
	FAM168B	CALR	ATP9A
	FAM199X	CALU	ATPAF1
	FAM53B	CAMKK2	ATR
	FAM53C	CAMSAP1	ATRN
	FAM8A1	CAMSAP2	ATRX
	FANCI	CAND1	ATXN1L
	FAR1	CANX	ATXN2L
	FASN	CAP1	ATXN7L3
	FAT1	CAPN15	ATXN7L3B
	FBXO21	CAPN2	AUP1
	FBXO5	CAPRIN1	AURKA
	FBXO7	CAPZA1	AURKAIP1
	FBXW11	CARM1	AVL9
	FBXW2	CASC3	AXIN1
	FEM1B	CASP7	AZIN1
	FEN1	CAST	B3GALNT2
	FKBP5	CBL	B3GALT6
	FLII	CBS	B3GAT3
	FLNA	CBWD1	B3GLCT
	FLNB	CBWD2	B4GALNT3
	FNDC3A	CBX1	B4GALT1
	FOXK1	CBX2	B4GALT2
	FOXK2	CBX5	BABAM1
	FOXM1	CBX6	BACH1
	FOXO3	CCAR1	BAG1
	FTSJ3	CCAR2	BAG3
	FUBP1	CCDC117	BAG5
	FUS	CCDC124	BAG6
	G2E3	CCDC137	BAHCC1
	G3BP1	CCDC142	BAHD1
	G3BP2	CCDC43	BAIAP2L1
	GALNT1	CCDC47	BAK1
	GALNT11	CCDC6	BANF1
	GAPVD1	CCDC8	BAP1
	GART	CCDC85C	BAZ1A
	GCN1	CCDC86	BAZ1B
	GDF11	CCDC93	BAZ2A
	GID8	CCDC97	BBS4
	GIGYF2	CCHCR1	BBX
	GLS	CCM2	BCAP31
	GLUL	CCNA2	BCAS2
	GLYR1	CCNB1IP1	BCAT1
	GNAI3	CCND2	BCCIP
	GNB1	CCND3	BCL2L1
	GNL2	CCNF	BCL2L13
	GNL3	CCNG1	BCL2L2
	GOLGA3	CCNI	BCL7A
	GPATCH4	CCNJ	BCL7B
	GPBP1L1	CCNT1	BCL7C
	GPR107	CCP110	BCL9
	GPRASP2	CCSAP	BCLAF1
	GRB2	CCT2	BCOR
	GRK6	CCT3	BCORL1
	GRSF1	CCT4	BCR
	GSK3B	CCT5	BDP1
	GSPT1	CCT6A	BECN1
	GTF3C1	CCT7	BET1L
	GTF3C4	CCT8	BFAR
	GTPBP4	CD164	BICD2
	GUCD1	CD2AP	BIN1
	H3-3B	CD2BP2	BIRC2
	HACD3	CD81	BIRC5
	HADHA	CD99L2	BIRC6
	HADHB	CDC123	BLM
	HAX1	CDC20	BLMH
	HBS1L	CDC23	BLOC1S6
	HDAC1	CDC25A	BLVRA
	HDAC2	CDC25B	BMI1
	HDGFL2	CDC27	BMPR2
	HEATR1	CDC37	BMS1
	HEATR5B	CDC42BPB	BOD1
	HECTD1	CDC42SE1	BOD1L1
	HECTD4	CDC45	BOP1
	HERC1	CDC5L	BORA
	HERC2	CDC6	BPNT1
	HIF1AN	CDC7	BPNT2
	HIPK1	CDCA2	BPTF
	HIPK2	CDCA4	BRAF
	HMG20A	CDCA5	BRCA1
	HMGB3	CDCA7	BRCC3
	HMGCR	CDCA7L	BRD2
	HNRNPA1	CDH2	BRD3
	HNRNPDL	CDIP1	BRD4
	HNRNPH1	CDK1	BRD7
	HNRNPH3	CDK12	BRD8
	HNRNPK	CDK13	BRD9
	HNRNPU	CDK16	BRF1
	HNRNPUL1	CDK2	BRI3BP
	HSD17B4	CDK5RAP2	BRPF3
	HSDL1	CDK6	BRWD1
	HSP90AA1	CDK8	BRWD3
	HSP90AB1	CDT1	BSDC1
	HSP90B1	CDV3	BTAF1
	HSPA4	CEBPZ	BTBD1
	HSPA8	CELF1	BTBD2
	HSPA9	CELSR2	BTBD3
	HSPD1	CELSR3	BTBD6
	HSPH1	CEMIP2	BTBD7
	HTATSF1	CENPB	BTN2A1
	HTT	CENPF	BTRC
	HUWE1	CENPI	BUB1
	IARS1	CENPO	BUB1B
	IARS2	CENPV	BUD31
	ICE1	CEP104	BYSL
	IER5	CEP170	BZW1
	IFRD2	CEP170B	BZW2
	IGF2BP1	CEP192	C11orf58
	IK	CEP250	C11orf95
	ILF3	CEP350	C12orf4
	ILRUN	CEP85	C12orf43
	IMPDH2	CERK	C14orf119
	INCENP	CERS2	C14orf132
	INTS1	CES2	C15orf39
	INTS5	CFL1	C16orf72
	IP6K1	CFL2	C17orf80
	IPO5	CGGBP1	C1orf109
	IPO7	CGN	C1orf115
	IPO9	CHAF1A	C1orf174
	IQGAP1	CHAF1B	C1orf198
	IREB2	CHAMP1	C1orf21
	IRS4	CHCHD2	C1orf216
	ISG20L2	CHCHD3	C1orf35
	ITPRID2	CHCHD4	C1orf43
	JUN	CHD1	C1QBP
	KANSL3	CHD2	C20orf27
	KAT7	CHD3	C22orf39
	KBTBD6	CHD6	C2CD3
	KCTD2	CHD7	C2CD5
	KCTD3	CHD8	C4orf3
	KCTD7	CHERP	C5orf24
	KDM1A	CHML	C5orf51
	KDM3B	CHMP1A	C6orf120
	KDM4A	CHMP3	C6orf62
	KDM5B	CHPT1	C6orf89
	KDM5C	CHSY1	C7orf50
	KEAP1	CHTF18	C8orf33
	KHDRBS1	CHUK	C9orf64
	KHSRP	CILK1	CABIN1
	KIAA0100	CIRBP	CABLES1
	KIAA0232	CISD2	CACTIN
	KIDINS220	CIZ1	CACUL1
	KIF11	CKAP2	CACYBP
	KIF1B	CKAP5	CAD
	KIF1C	CKB	CADM1
	KIF2A	CKS1B	CALD1
	KIF2C	CLASP1	CALM1
	KIF3B	CLASP2	CALR
	KIF4A	CLCC1	CALU
	KLHDC10	CLCN5	CAMK2G
	KLHL12	CLDN12	CAMKK2
	KLHL15	CLIC4	CAMSAP1
	KLHL21	CLINT1	CAMSAP2
	KLHL9	CLIP1	CAND1
	KMT2A	CLNS1A	CANT1
	KMT2C	CLPB	CANX
	KMT2D	CLPTM1L	CAP1
	KNOP1	CLSPN	CAPN10
	KPNA4	CLSTN1	CAPN15
	KPNA6	CLTA	CAPN2
	KPNB1	CLTC	CAPN7
	KRI1	CLUH	CAPRIN1
	KTN1	CMTM4	CAPZA1
	L3MBTL2	CMTM6	CAPZB
	LAMC1	CMTR1	CARM1
	LAMTOR1	CNBP	CARNMT1
	LARP1	CNDP2	CARS1
	LARS1	CNIH1	CASC3
	LASP1	CNN3	CASP7
	LBR	CNNM3	CAST
	LIN28B	CNNM4	CBL
	LMAN2	CNOT1	CBWD1
	LMNB1	CNOT10	CBWD2
	LMNB2	CNOT4	CBX1
	LONP1	CNOT6	CBX2
	LRATD2	CNOT8	CBX5
	LRBA	CNOT9	CBX6
	LRPPRC	CNP	CC2D1A
	LRRC58	CNTROB	CCAR1
	LRRC59	COA1	CCAR2
	LSM14A	COA6	CCDC117
	LUZP1	COASY	CCDC124
	MACF1	COCH	CCDC134
	MAGED1	COG8	CCDC137
	MAML1	COIL	CCDC14
	MAP4	COL2A1	CCDC174
	MAP4K4	COL4A1	CCDC22
	MAP7D1	COL4A2	CCDC28B
	MAPK1	COL4A5	CCDC43
	MAPK14	COL4A6	CCDC6
	MAPK1IP1L	COLGALT1	CCDC77
	MAPRE1	COP1	CCDC85C
	MARK3	COPA	CCDC86
	MARS1	COPB1	CCDC88A
	MARS2	COPB2	CCDC90B
	MATR3	COPG2	CCDC93
	MBTPS1	COPS3	CCDC97
	MCL1	COPS4	CCHCR1
	MCM10	COPS5	CCM2
	MCM2	COPZ1	CCNA2
	MCM3	COQ9	CCNB1IP1
	MCM3AP	CORO1C	CCNB2
	MCM5	COTL1	CCNC
	MCM6	COX11	CCND2
	MCM7	COX15	CCND3
	MDM2	COX7C	CCNF
	MDN1	CPD	CCNG1
	MECP2	CPSF1	CCNI
	MED12	CPSF3	CCNJ
	MED14	CPSF6	CCNK
	MED22	CPSF7	CCNT1
	MEGF8	CREB3	CCNT2
	METTL3	CREBBP	CCNY
	MFN2	CREG1	CCP110
	MGAT5	CRK	CCSAP
	MGME1	CRKL	CCT2
	MIA3	CRTAP	CCT3
	MID1IP1	CRTC3	CCT4
	MIEF1	CS	CCT5
	MIGA1	CSDE1	CCT6A
	MKI67	CSE1L	CCT7
	MKRN1	CSK	CCT8
	MLEC	CSNK1A1	CD164
	MLLT1	CSNK1D	CD276
	MLLT6	CSNK1G2	CD2AP
	MLXIP	CSNK2A1	CD2BP2
	MMADHC	CSTF2T	CD320
	MMGT1	CSTF3	CD81
	MORF4L2	CTBP1	CD99L2
	MPP1	CTCF	CDC123
	MPRIP	CTDSP2	CDC14B
	MRPL9	CTDSPL2	CDC20
	MRPS27	CTIF	CDC23
	MSH2	CTNNA1	CDC25A
	MSH6	CTNNAL1	CDC25B
	MTA2	CTNNB1	CDC27
	MTARC1	CTPS1	CDC37
	MTF2	CTR9	CDC40
	MTHFD1	CTTN	CDC42
	MTHFD2	CUL1	CDC42BPA
	MTHFR	CUL2	CDC42BPB
	MTMR12	CUL3	CDC42SE1
	MTMR3	CUL4A	CDC45
	MTMR4	CUL4B	CDC5L
	MTOR	CUL5	CDC6
	MTR	CUL7	CDC7
	MTSS2	CUTA	CDCA2
	MYBBP1A	CUX1	CDCA4
	MYBL2	CWC15	CDCA5
	MYCBP2	CWC22	CDCA7
	MYH10	CWF19L1	CDCA7L
	MYH9	CXXC1	CDCA8
	MYO18A	CYB5RL	CDH2
	NAA15	CYFIP1	CDIP1
	NAA20	CYFIP2	CDIPT
	NAA25	CYTH1	CDK1
	NAA50	CYTH3	CDK12
	NACC1	DAG1	CDK13
	NAP1L1	DAP	CDK16
	NASP	DAP3	CDK19
	NAT10	DAPK1	CDK2
	NBR1	DARS1	CDK2AP1
	NCAPD2	DARS2	CDK5RAP1
	NCAPD3	DAXX	CDK5RAP2
	NCAPH	DAZAP1	CDK6
	NCL	DBI	CDK8
	NCLN	DBN1	CDKN1B
	NCOA4	DCAF1	CDR2L
	NCOA5	DCAF11	CDS1
	NCOR2	DCAF12	CDS2
	NDFIP2	DCAF17	CDT1
	NDST1	DCAF5	CDV3
	NDUFAB1	DCAF6	CEBPZ
	NELFB	DCAF7	CELF1
	NEMP1	DCP1A	CELSR2
	NFE2L1	DCP2	CELSR3
	NFRKB	DCTN1	CEMIP2
	NFX1	DCTN2	CENPB
	NIBAN2	DCTN4	CENPF
	NIN	DCTN5	CENPI
	NIPAL3	DCUN1D4	CENPJ
	NIPBL	DCUN1D5	CENPO
	NKRF	DDB1	CENPU
	NLN	DDI2	CENPV
	NMD3	DDIAS	CEP104
	NMT1	DDIT4	CEP128
	NOLC1	DDOST	CEP131
	NOP53	DDX1	CEP164
	NOP56	DDX10	CEP170
	NOP58	DDX18	CEP170B
	NOP9	DDX19A	CEP192
	NOTCH2	DDX20	CEP250
	NPEPPS	DDX21	CEP350
	NPM1	DDX23	CEP41
	NRAS	DDX24	CEP57
	NSD1	DDX27	CEP68
	NSD2	DDX31	CEP78
	NSD3	DDX39A	CEP85
	NUDCD3	DDX3X	CERK
	NUDT12	DDX41	CERS2
	NUDT21	DDX42	CERS6
	NUFIP2	DDX46	CES2
	NUMA1	DDX50	CETN2
	NUP107	DDX54	CFAP36
	NUP133	DDX56	CFL1
	NUP153	DDX6	CFL2
	NUP160	DEAF1	CGGBP1
	NUP205	DEGS1	CGN
	NUP54	DENND11	CHAF1A
	NUP98	DENND4B	CHAF1B
	NVL	DENR	CHAMP1
	OBI1	DEPDC1	CHCHD2
	ODF2	DESI1	CHCHD3
	OGA	DESI2	CHCHD4
	OGT	DFFA	CHCHD7
	OPA1	DGKD	CHD1
	ORMDL3	DGKZ	CHD2
	OSBPL9	DHCR24	CHD3
	OTUD4	DHRS7	CHD7
	OTUD7B	DHX15	CHD8
	PA2G4	DHX16	CHERP
	PABPC4	DHX29	CHID1
	PACSIN2	DHX30	CHM
	PAFAH1B2	DHX33	CHML
	PALLD	DHX34	CHMP1A
	PAM	DHX36	CHMP3
	PAPOLA	DHX37	CHMP4B
	PARP1	DHX38	CHN1
	PBRM1	DHX40	CHORDC1
	PBX1	DHX57	CHPF2
	PCNT	DHX8	CHPT1
	PCNX1	DHX9	CHSY1
	PCNX4	DIAPH1	CHTF18
	PDCD11	DICER1	CHUK
	PDCD6IP	DIDO1	CIAO1
	PDCD7	DIP2A	CIAO3
	PDXK	DIP2B	CIC
	PEF1	DIS3	CILK1
	PELP1	DIS3L	CINP
	PEX19	DIXDC1	CIPC
	PFAS	DKC1	CIR1
	PFDN1	DLAT	CIRBP
	PGD	DLD	CIT
	PHF10	DLG3	CIZ1
	PHF3	DLG5	CKAP2
	PHF8	DLST	CKAP4
	PHIP	DNAAF5	CKAP5
	PHLDA3	DNAJA1	CKB
	PHRF1	DNAJA3	CKS1B
	PI4KB	DNAJB1	CLASP1
	PIK3C2A	DNAJC10	CLASP2
	PIM3	DNAJC13	CLCC1
	PIP4K2B	DNAJC3	CLCN3
	PITPNB	DNAJC5	CLCN5
	PJA2	DNAJC7	CLDN12
	PKN2	DNM1L	CLIC4
	PLAGL2	DNM2	CLINT1
	PLEC	DNMT1	CLIP1
	PLEKHB2	DNTTIP2	CLN6
	PLRG1	DOCK7	CLNS1A
	PLS3	DONSON	CLPB
	PLXNA1	DOT1L	CLPTM1
	PLXNB2	DPF2	CLPTM1L
	PNRC2	DPP8	CLPX
	POFUT1	DPP9	CLSPN
	POLA1	DPY19L1	CLSTN1
	POLDIP3	DPY19L3	CLTA
	POLE	DPYSL5	CLTB
	POLE3	DR1	CLTC
	POLG	DRG1	CLUH
	POLR1A	DROSHA	CMBL
	POLR1F	DSC3	CMPK1
	POLR2A	DSCC1	CMSS1
	POLR3A	DSG2	CMTM4
	POLR3H	DSN1	CMTM6
	POM121	DSP	CMTR1
	POP1	DST	CNBP
	POU2F1	DSTN	CNDP2
	POU4F1	DSTYK	CNIH1
	PPARGC1B	DTL	CNN3
	PPAT	DTNA	CNNM3
	PPIG	DTYMK	CNNM4
	PPM1F	DUS1L	CNOT1
	PPP1R12A	DUSP16	CNOT10
	PPP1R14C	DUSP3	CNOT11
	PPP1R8	DUSP7	CNOT3
	PPP2R1A	DUT	CNOT4
	PPP2R1B	DVL1	CNOT6
	PPP3R1	DVL2	CNOT8
	PPP4R3A	DYM	CNOT9
	PPP5C	DYNC1H1	CNP
	PPP6R2	DYNC1I2	CNPPD1
	PPRC1	DYNC1LI2	CNTROB
	PREB	DYNC2H1	COA1
	PRKDC	DYNLL2	COA6
	PRKRA	DYRK3	COA7
	PRKX	DZIP1	COASY
	PRMT5	E2F1	COCH
	PRMT6	E2F3	COG8
	PRMT7	E2F4	COIL
	PRPF40A	E2F7	COL2A1
	PRPF4B	EAF1	COL4A1
	PRPF6	EBNA1BP2	COL4A2
	PRPF8	EBP	COL4A5
	PRR14L	ECD	COL4A6
	PRRC1	ECE1	COLEC12
	PRRC2A	ECPAS	COLGALT1
	PRRC2C	ECT2	COP1
	PSMC1	EDC3	COPA
	PSMD1	EDC4	COPB1
	PSMD14	EDEM3	COPB2
	PSMD2	EEA1	COPG1
	PSMD3	EEF1B2	COPG2
	PSME3	EEF1D	COPRS
	PTBP1	EEF2	COPS3
	PTGES3	EFHD2	COPS4
	PTK2	EFL1	COPS5
	PTMA	EFNB2	COPS8
	PTP4A2	EHBP1	COPZ1
	PTPN1	EHD4	COQ9
	PTPN11	EHMT1	CORO1C
	PTPN23	EHMT2	COTL1
	PUM1	EIF1AX	COX11
	PUM2	EIF2A	COX15
	PYGB	EIF2AK1	COX4I1
	PYGL	EIF2AK2	COX5B
	PYGO2	EIF2D	COX7B
	QSER1	EIF2S1	COX7C
	R3HCC1	EIF2S2	CPD
	RAB10	EIF2S3	CPNE3
	RAB14	EIF3A	CPOX
	RAB3GAP1	EIF3B	CPSF1
	RAB3GAP2	EIF3D	CPSF2
	RABL6	EIF3F	CPSF3
	RALGAPB	EIF3K	CPSF6
	RAMAC	EIF3L	CPSF7
	RAN	EIF3M	CPT1A
	RANBP2	EIF4B	CPT2
	RANGAP1	EIF4E2	CPVL
	RARS1	EIF4EBP2	CRBN
	RBBP4	EIF4ENIF1	CRCP
	RBBP5	EIF4G1	CREB3
	RBBP7	EIF4G2	CREB3L2
	RBBP8	EIF4G3	CREBZF
	RBFOX2	EIF4H	CREG1
	RBM10	EIF5	CRIM1
	RBM12	EIF5B	CRK
	RBM12B	ELAC2	CRKL
	RBM15B	ELMOD2	CRTAP
	RBM17	ELOA	CRTC3
	RBM25	ELOVL5	CRYBG3
	RBM26	ELOVL6	CRYZ
	RBM28	ELP1	CS
	RBM39	ELP2	CSDE1
	RBM6	EMC10	CSE1L
	RBMX	EMG1	CSK
	RC3H2	EML4	CSNK1A1
	RCC1	EN2	CSNK1D
	RCC2	ENAH	CSNK1E
	RDH11	ENO1	CSNK1G1
	RDX	ENOPH1	CSNK1G2
	REPS1	ENOX2	CSNK2A1
	RETREG3	ENSA	CSNK2A2
	RFWD3	ENTPD6	CSPG5
	RFX5	ENTPD7	CSRP2
	RGP1	EP400	CSTF2
	RHOA	EPB41	CSTF2T
	RIC8A	EPB41L2	CSTF3
	RIF1	EPB41L3	CTBP1
	RIMS4	EPHA7	CTBP2
	RIOK3	EPHB4	CTCF
	RIOX2	EPN1	CTDNEP1
	RLIM	EPRS1	CTDSP1
	RMND5A	ERBB2	CTDSP2
	RNF14	ERC1	CTDSPL
	RNF20	ERCC3	CTDSPL2
	RNF216	ERCC6	CTNNA1
	RNF4	ERCC6L	CTNNAL1
	RNF40	ERF	CTNNB1
	RNF8	ERGIC1	CTNNBL1
	RNPS1	ERI3	CTPS1
	ROBO1	ERLIN2	CTPS2
	RPA1	ERO1A	CTR9
	RPA2	ERP29	CTSB
	RPF2	ESPL1	CTSL
	RPL11	ESRRA	CTTN
	RPL15	ESYT1	CTU2
	RPL3	ESYT2	CUL1
	RPL4	ETF1	CUL2
	RPL6	ETNK1	CUL3
	RPL7	EWSR1	CUL4A
	RPLP0	EXD2	CUL4B
	RPN2	EXO1	CUL5
	RPRD1A	EXOC2	CUL7
	RPRD1B	EXOC5	CUTA
	RPS11	EXOC6B	CUX1
	RPS19	EXOC7	CWC15
	RPS4X	EXOSC10	CWC22
	RPS6KA3	EXOSC9	CXorf38
	RPS8	EXTL3	CXXC1
	RRBP1	EYA3	CYB5B
	RRM1	EZH2	CYB5RL
	RRM2	FAAP100	CYBA
	RRP1	FADS1	CYC1
	RRP12	FAF1	CYFIP1
	RRP1B	FAF2	CYFIP2
	RRP7A	FAM104A	CYLD
	RSF1	FAM120A	CYTH3
	RSL24D1	FAM120B	DAAM1
	RSPRY1	FAM126A	DAB2IP
	RTCB	FAM136A	DACH1
	RTL6	FAM155B	DAG1
	RUVBL1	FAM168A	DAP
	RUVBL2	FAM168B	DAP3
	SACS	FAM189B	DAPK1
	SAE1	FAM199X	DARS1
	SAFB	FAM20B	DARS2
	SAFB2	FAM217B	DAXX
	SALL2	FAM219B	DAZAP1
	SARS1	FAM234A	DBI
	SART1	FAM53B	DBN1
	SART3	FAM53C	DBNDD1
	SBF1	FAM8A1	DCAF1
	SCAF11	FAM98A	DCAF10
	SCAF8	FAN1	DCAF11
	SCAP	FANCA	DCAF12
	SCD	FANCD2	DCAF15
	SCOC	FANCI	DCAF17
	SCRIB	FAR1	DCAF5
	SCRN1	FARP2	DCAF6
	SDHB	FARSA	DCAF7
	SEC11A	FASN	DCK
	SEC16A	FAT1	DCP1A
	SEC23A	FAU	DCP2
	SEC24A	FBH1	DCTD
	SEC24C	FBL	DCTN1
	SEC31A	FBN2	DCTN2
	SEC61A1	FBRS	DCTN4
	SECISBP2	FBRSL1	DCTN5
	SEL1L	FBXL18	DCTPP1
	SELENOF	FBXL19	DCUN1D4
	SELENOI	FBXL20	DCUN1D5
	SEPTIN8	FBXO10	DDAH1
	SERBP1	FBXO21	DDB1
	SERINC1	FBXO28	DDHD2
	SESN1	FBXO30	DDI2
	SET	FBXO34	DDOST
	SETD1A	FBXO5	DDX1
	SETD5	FBXO7	DDX10
	SETDB1	FBXO9	DDX11
	SF3A1	FBXW11	DDX18
	SF3A3	FBXW2	DDX19A
	SF3B1	FDPS	DDX20
	SF3B3	FEM1B	DDX21
	SFPQ	FEN1	DDX23
	SFXN1	FEZ2	DDX24
	SGTA	FGFRL1	DDX27
	SH3PXD2A	FH	DDX39A
	SHCBP1	FHL1	DDX3X
	SHLD2	FHOD1	DDX41
	SIMC1	FIGNL1	DDX42
	SINHCAF	FKBP10	DDX46
	SKI	FKBP4	DDX49
	SKP2	FKBP5	DDX5
	SLC16A1	FKTN	DDX50
	SLC1A5	FLII	DDX54
	SLC20A1	FLNA	DDX56
	SLC25A17	FLNB	DDX6
	SLC25A4	FLYWCH1	DEAF1
	SLC25A6	FNDC3A	DEGS1
	SLC30A1	FNIP2	DEK
	SLC31A1	FOCAD	DENND11
	SLC35B4	FOXK1	DENND4B
	SLC35D1	FOXK2	DENND4C
	SLC38A1	FOXM1	DENND5A
	SLC39A10	FOXN3	DENR
	SLC39A14	FOXO3	DEPDC1
	SLC41A1	FOXO4	DEPDC1B
	SLC4A1AP	FOXP4	DESI1
	SLC4A2	FP565260.1	DESI2
	SLC5A3	FSCN1	DEXI
	SLC6A15	FSTL1	DFFA
	SLC7A1	FTSJ3	DGCR2
	SLF2	FUBP1	DGKD
	SLIT2	FUBP3	DGKZ
	SLK	FUCA2	DHCR24
	SLTM	FUNDC2	DHCR7
	SMARCA1	FURIN	DHRS13
	SMARCA4	FUS	DHRS7
	SMARCC1	FXR2	DHX15
	SMARCD1	FYN	DHX16
	SMC1A	FYTTD1	DHX29
	SMC2	G2E3	DHX30
	SMC3	G3BP1	DHX33
	SMC4	G3BP2	DHX34
	SMG1	GADD45A	DHX36
	SMG5	GAK	DHX37
	SMG6	GALNT1	DHX38
	SMG7	GALNT11	DHX40
	SMG8	GALNT2	DHX57
	SMPD4	GAPVD1	DHX8
	SMU1	GARS1	DHX9
	SNRNP200	GART	DIAPH1
	SNRNP70	GATAD1	DIAPH3
	SNW1	GATAD2A	DICER1
	SNX11	GATAD2B	DIDO1
	SNX12	GATB	DIP2A
	SNX27	GBA2	DIP2B
	SOCS7	GBE1	DIS3
	SON	GBF1	DIS3L
	SP1	GCN1	DIXDC1
	SPAG5	GDF11	DKC1
	SPART	GDI2	DLAT
	SPAST	GEMIN4	DLD
	SPEN	GEMIN5	DLG1
	SPIN1	GET1	DLG3
	SPTAN1	GFM1	DLG5
	SPTBN1	GGA2	DLGAP5
	SPTBN2	GGNBP2	DLST
	SPTLC2	GID8	DMAC2
	SPTY2D1	GIGYF2	DMAP1
	SREBF2	GIPC1	DMD
	SRF	GIT1	DMPK
	SRP72	GLA	DNAAF5
	SRPK1	GLE1	DNAJA1
	SRPRA	GLMN	DNAJA2
	SRRM1	GLOD4	DNAJA3
	SRRM2	GLS	DNAJB12
	SRRT	GLUD1	DNAJB6
	SRSF2	GLUL	DNAJC1
	SRSF3	GLYR1	DNAJC10
	SRSF4	GMCL1	DNAJC13
	SRSF6	GMEB1	DNAJC3
	SRSF7	GMEB2	DNAJC5
	SSNA1	GMPPB	DNAJC7
	SSR1	GMPR2	DNAJC8
	ST13	GMPS	DNASE2
	STAG2	GNA11	DNM1L
	STARD7	GNA12	DNM2
	STAT1	GNAI1	DNMT1
	STIP1	GNAI3	DNMT3B
	STK25	GNB1	DNTTIP2
	STK40	GNB4	DOCK1
	STRAP	GNG12	DOCK7
	SUCO	GNL2	DOLPP1
	SUPT16H	GNL3	DONSON
	SUPT5H	GNPAT	DOP1A
	SUPT6H	GNPTAB	DOT1L
	SURF4	GNS	DPCD
	SUZ12	GOLGA2	DPF2
	SYMPK	GOLGA3	DPH2
	SZRD1	GOLM1	DPH5
	TAB2	GPAM	DPH7
	TACC3	GPAT4	DPP3
	TAF1	GPATCH11	DPP8
	TAF15	GPATCH4	DPP9
	TAF5L	GPATCH8	DPY19L1
	TAOK1	GPBP1L1	DPY19L3
	TAOK2	GPC4	DPYSL5
	TARBP1	GPD1L	DR1
	TASOR	GPD2	DRG1
	TASOR2	GPHN	DROSHA
	TBC1D10B	GPI	DSC2
	TBC1D14	GPR107	DSC3
	TBC1D16	GPRASP2	DSCC1
	TBC1D2B	GPRIN1	DSG2
	TBC1D4	GPS1	DSN1
	TBC1D9B	GPT2	DSP
	TBL1X	GRAMD1A	DST
	TCAF1	GRB10	DSTN
	TCERG1	GRB2	DSTYK
	TCF20	GREB1L	DTL
	TCOF1	GRINA	DTNA
	TELO2	GRIPAP1	DTYMK
	TGOLN2	GRK2	DUS1L
	THOC2	GRK6	DUSP11
	THRAP3	GRSF1	DUSP16
	TIAM1	GSE1	DUSP3
	TICRR	GSK3B	DUSP7
	TIMM50	GSPT1	DUT
	TIPIN	GTF2A1	DVL1
	TIPRL	GTF2E2	DVL2
	TJP1	GTF2I	DYM
	TKT	GTF2IRD1	DYNC1H1
	TLN1	GTF3C1	DYNC1I2
	TM9SF3	GTF3C2	DYNC1LI2
	TMEM164	GTF3C3	DYNC2H1
	TMEM167B	GTF3C4	DYNC2I2
	TMEM230	GTF3C5	DYNLL2
	TMTC3	GTPBP1	DYRK2
	TNFRSF10B	GTPBP4	DYRK3
	TNKS1BP1	GTPBP6	DZIP1
	TNPO1	GTSE1	E2F1
	TNRC18	GUCD1	E2F3
	TNRC6A	GZF1	E2F4
	TOMM40	H1-0	E2F5
	TOMM70	H2AZ2	E2F7
	TONSL	H3-3B	EAF1
	TOP2A	HACD3	EARS2
	TOP2B	HADH	EBNA1BP2
	TOPORS	HADHA	EBP
	TP53BP1	HADHB	ECD
	TP53BP2	HAUS6	ECE1
	TPM3	HAX1	ECHS1
	TPR	HBS1L	ECI2
	TPX2	HCFC1	ECPAS
	TRA2B	HDAC1	ECSIT
	TRAFD1	HDAC2	ECT2
	TRAP1	HDAC3	EDC3
	TRAPPC8	HDAC5	EDC4
	TRIM25	HDAC7	EDEM1
	TRIM27	HDGF	EDEM3
	TRIM44	HDGFL2	EDRF1
	TRIP12	HDGFL3	EEA1
	TRMT1	HDHD5	EEF1A1
	TRO	HDLBP	EEF1A2
	TRRAP	HEATR1	EEF1B2
	TSC2	HEATR3	EEF1D
	TSC22D3	HEATR5B	EEF2
	TSN	HEATR6	EEFSEC
	TSPYL1	HECTD1	EFHD2
	TSR1	HECTD4	EFL1
	TTC17	HELZ	EHBP1
	TTC19	HERC1	EHD1
	TTC28	HERC2	EHD4
	TTC37	HERC3	EHMT1
	TTF2	HERPUD1	EHMT2
	TTK	HES4	EIF1
	TTLL12	HEXIM1	EIF1AX
	TTLL4	HGH1	EIF2A
	TUBB	HIF1A	EIF2AK1
	TUBGCP2	HIF1AN	EIF2AK2
	TUBGCP6	HIP1	EIF2AK4
	TUFM	HIPK1	EIF2B1
	TWNK	HIPK2	EIF2B2
	TXLNA	HIRA	EIF2B3
	TXNRD1	HK1	EIF2B4
	U2AF2	HK2	EIF2B5
	U2SURP	HMBS	EIF2D
	UBA1	HMG20A	EIF2S1
	UBA3	HMGA2	EIF2S2
	UBAC2	HMGB1	EIF2S3
	UBAP2L	HMGB3	EIF3A
	UBE2O	HMGCR	EIF3B
	UBE2Z	HMGCS1	EIF3D
	UBE3C	HMGN1	EIF3E
	UBE4B	HMGN2	EIF3F
	UBN1	HMGXB3	EIF3G
	UBQLN1	HNRNPA0	EIF3J
	UBQLN4	HNRNPA1	EIF3K
	UBR3	HNRNPA2B1	EIF3L
	UBR4	HNRNPA3	EIF3M
	UBTD2	HNRNPAB	EIF4A2
	UCK2	HNRNPC	EIF4B
	UIMC1	HNRNPDL	EIF4E2
	UMPS	HNRNPF	EIF4EBP1
	UNC119B	HNRNPH1	EIF4EBP2
	UNC45A	HNRNPH3	EIF4ENIF1
	UNC5B	HNRNPK	EIF4G1
	UNG	HNRNPM	EIF4G2
	UPF1	HNRNPR	EIF4G3
	URB1	HNRNPU	EIF4H
	URB2	HNRNPUL1	EIF5
	USO1	HOMER1	EIF5B
	USP1	HOMER2	EIPR1
	USP12	HOMEZ	ELAC2
	USP16	HOXA10	ELF2
	USP22	HOXD13	ELK1
	USP33	HPRT1	ELMOD2
	USP34	HPS4	ELOA
	USP7	HPS5	ELOC
	USP9X	HS6ST1	ELOVL5
	UTP14A	HSD17B4	ELOVL6
	UTP20	HSDL1	ELP1
	UTP4	HSDL2	ELP2
	VBP1	HSF1	ELP6
	VCAN	HSF2	EMB
	VCL	HSP90AA1	EMC10
	VDAC1	HSP90AB1	EMD
	VPS72	HSP90B1	EME1
	WASF2	HSPA1B	EMG1
	WASHC2A	HSPA4	EML4
	WASHC2C	HSPA4L	EN2
	WBP11	HSPA5	ENAH
	WDCP	HSPA8	ENC1
	WDR26	HSPA9	ENGASE
	WDR3	HSPD1	ENO1
	WDR33	HSPH1	ENOPH1
	WDR36	HTATSF1	ENOX2
	WDR43	HTRA2	ENSA
	WDR5	HTT	ENTPD4
	WDR6	HUWE1	ENTPD6
	WDR82	HYOU1	ENTPD7
	WNK1	IARS1	ENTR1
	XBP1	IARS2	EP400
	XPO1	IBA57	EPAS1
	XPO5	ICE1	EPB41
	XPO6	ICMT	EPB41L2
	XPOT	IDE	EPB41L3
	XRCC5	IDH1	EPHB4
	XRCC6	IDH3A	EPN1
	XRN2	IDI1	EPRS1
	YAP1	IER5	EPS15
	YARS1	IFFO2	ERAL1
	YKT6	IFNAR1	ERBB2
	YLPM1	IFNGR2	ERBIN
	YTHDC2	IFRD2	ERC1
	YTHDF2	IFT172	ERCC2
	YWHAG	IGF1R	ERCC3
	YWHAZ	IGF2BP1	ERCC6
	YY1	IGF2BP3	ERCC6L
	ZBED4	IGF2R	ERF
	ZBTB33	IGFBP5	ERG28
	ZC3H13	IK	ERGIC1
	ZC3H15	IL6ST	ERGIC3
	ZC3H18	ILF3	ERI3
	ZFR	ILKAP	ERLIN2
	ZFYVE16	ILRUN	ERO1A
	ZHX3	ILVBL	ERP29
	ZKSCAN1	IMMT	ERP44
	ZKSCAN8	IMPDH2	ESCO2
	ZMYM2	INCENP	ESPL1
	ZMYM3	INF2	ESRRA
	ZNF106	ING5	ESYT1
	ZNF142	INO80E	ESYT2
	ZNF146	INPP4A	ETF1
	ZNF207	INPPL1	ETNK1
	ZNF24	INSIG1	ETV3
	ZNF281	INTS1	EVC
	ZNF282	INTS11	EWSR1
	ZNF316	INTS12	EXD2
	ZNF317	INTS13	EXO1
	ZNF398	INTS3	EXOC1
	ZNF512	INTS5	EXOC2
	ZNF512B	INTS7	EXOC4
	ZNF589	IP6K1	EXOC5
	ZNF592	IPO11	EXOC6B
	ZNF598	IPO13	EXOC7
	ZNF609	IPO5	EXOSC10
	ZNF629	IPO7	EXOSC9
	ZNF638	IPO8	EXT2
	ZNF678	IPO9	EXTL3
	ZNF740	IQGAP1	EYA3
	ZNF768	IQGAP3	EYA4
	ZNF770	IQSEC1	EZH2
	ZNF787	IRAK1	EZR
	ZUP1	IREB2	FAAP100
		IRF2BP2	FADS1
		IRS4	FAF1
		ISG20L2	FAF2
		ISYNA1	FAH
		ITCH	FAM104A
		ITGB1	FAM107B
		ITGB1BP1	FAM120A
		ITPK1	FAM120AOS
		ITPRID2	FAM120B
		ITSN1	FAM122B
		IVD	FAM126A
		IVNS1ABP	FAM136A
		JADE1	FAM168A
		JADE3	FAM168B
		JAK1	FAM171A1
		JMJD4	FAM189B
		JMJD6	FAM193A
		JOSD1	FAM199X
		JPT2	FAM20B
		JRK	FAM210B
		JUN	FAM217B
		KANK2	FAM219B
		KANSL3	FAM234A
		KARS1	FAM234B
		KAT6A	FAM50A
		KAT7	FAM53B
		KBTBD6	FAM53C
		KCNJ12	FAM8A1
		KCTD10	FAM91A1
		KCTD12	FAM98A
		KCTD2	FAN1
		KCTD20	FANCA
		KCTD3	FANCC
		KCTD7	FANCD2
		KCTD9	FANCG
		KDM1A	FANCI
		KDM2B	FAR1
		KDM3B	FARP1
		KDM4A	FARP2
		KDM4B	FARSA
		KDM5A	FASN
		KDM5B	FAT1
		KDM5C	FAU
		KEAP1	FBH1
		KHDRBS1	FBL
		KHNYN	FBN2
		KHSRP	FBRS
		KIAA0100	FBRSL1
		KIAA0232	FBXL18
		KIAA0319L	FBXL19
		KIAA0930	FBXL20
		KIAA1191	FBXO10
		KIAA1586	FBXO11
		KIDINS220	FBXO21
		KIF11	FBXO22
		KIF13A	FBXO28
		KIF14	FBXO30
		KIF1B	FBXO34
		KIF1C	FBXO5
		KIF20A	FBXO7
		KIF20B	FBXO9
		KIF22	FBXW11
		KIF2A	FBXW2
		KIF2C	FBXW4
		KIF3B	FDFT1
		KIF4A	FDPS
		KIF5B	FECH
		KIF5C	FEM1B
		KIF7	FEN1
		KIFAP3	FERMT2
		KIFC1	FEZ2
		KLF13	FGD1
		KLF9	FGFR1
		KLHDC10	FGFRL1
		KLHL12	FH
		KLHL15	FHL1
		KLHL18	FHOD1
		KLHL21	FIGNL1
		KLHL23	FJX1
		KLHL5	FKBP10
		KLHL9	FKBP4
		KMT2A	FKBP5
		KMT2B	FKBP8
		KMT2C	FKTN
		KMT2D	FLII
		KMT5A	FLNA
		KNOP1	FLNB
		KNTC1	FLOT1
		KPNA1	FLVCR1
		KPNA3	FLYWCH1
		KPNA4	FNBP1L
		KPNA6	FNDC3A
		KPNB1	FNIP2
		KREMEN1	FOCAD
		KRI1	FOXC1
		KRT10	FOXJ3
		KRT18	FOXK1
		KTN1	FOXK2
		L3MBTL2	FOXM1
		LAMC1	FOXN3
		LAMTOR1	FOXO3
		LAP3	FOXO4
		LARP1	FOXP4
		LARP4	FP565260.1
		LARP4B	FPGS
		LARS1	FPGT
		LARS2	FRAS1
		LAS1L	FSCN1
		LASP1	FSD1
		LBR	FSTL1
		LCOR	FTH1
		LDB1	FTSJ3
		LEMD2	FUBP1
		LEMD3	FUBP3
		LETM1	FUCA2
		LGMN	FUNDC2
		LGR4	FURIN
		LIG1	FUS
		LIG3	FUZ
		LIMA1	FXR1
		LIMD1	FXR2
		LIN28B	FYN
		LIN9	FYTTD1
		LLGL1	G2E3
		LMAN2	G3BP1
		LMBR1	G3BP2
		LMNA	GABPA
		LMNB1	GAK
		LMNB2	GALNT1
		LMTK2	GALNT11
		LONP1	GALNT2
		LPCAT1	GANAB
		LPGAT1	GAPDH
		LPIN2	GAPVD1
		LRATD2	GARS1
		LRBA	GART
		LRIG1	GAS6
		LRP5	GATAD1
		LRPPRC	GATAD2A
		LRRC14	GATAD2B
		LRRC41	GATB
		LRRC47	GATC
		LRRC58	GBA2
		LRRC59	GBE1
		LRRC8A	GBF1
		LRRFIP1	GCN1
		LSG1	GDAP1
		LSM10	GDE1
		LSM11	GDF11
		LSM14A	GDI1
		LSM14B	GDI2
		LSM2	GEMIN4
		LSM4	GEMIN5
		LSS	GET1
		LTA4H	GET3
		LUC7L2	GFER
		LUZP1	GFM1
		LYPLA1	GFM2
		LZTR1	GFPT1
		MACF1	GGA2
		MAGED1	GGA3
		MAGED2	GGCX
		MAGI1	GGNBP2
		MAML1	GGPS1
		MANEAL	GHITM
		MAP2K1	GID4
		MAP2K2	GID8
		MAP2K4	GIGYF2
		MAP3K11	GIPC1
		MAP3K4	GIT1
		MAP3K7	GJA1
		MAP4	GLA
		MAP4K4	GLB1
		MAP7D1	GLCE
		MAP7D3	GLE1
		MAPK1	GLG1
		MAPK14	GLMN
		MAPK1IP1L	GLO1
		MAPKAP1	GLOD4
		MAPKAPK3	GLS
		MAPKAPK5	GLTP
		MAPRE1	GLUD1
		MAPRE2	GLUL
		MARCHF5	GLYR1
		MARCHF7	GM2A
		MARCHF8	GMCL1
		MARF1	GMEB1
		MARK2	GMEB2
		MARK3	GMFB
		MARS1	GMNN
		MARS2	GMPPB
		MARVELD1	GMPR2
		MAST2	GMPS
		MAT2A	GNA11
		MATR3	GNA12
		MAU2	GNA13
		MAVS	GNAI1
		MAZ	GNAI2
		MBD1	GNAI3
		MBD3	GNAQ
		MBNL1	GNB1
		MBNL3	GNB4
		MBTPS1	GNG12
		MCFD2	GNG4
		MCL1	GNL2
		MCM10	GNL3
		MCM2	GNL3L
		MCM3	GNPAT
		MCM3AP	GNPDA1
		MCM4	GNPNAT1
		MCM5	GNPTAB
		MCM6	GNS
		MCM7	GOLGA2
		MCM9	GOLGA3
		MCMBP	GOLGA5
		MCRS1	GOLGB1
		MDC1	GOLIM4
		MDH2	GOLM1
		MDM2	GOLPH3
		MDN1	GON4L
		MEAK7	GOPC
		MECP2	GORASP1
		MED12	GOT1
		MED13L	GOT2
		MED14	GPAA1
		MED20	GPAM
		MED22	GPAT4
		MED23	GPATCH11
		MED24	GPATCH2L
		MED28	GPATCH4
		MED29	GPATCH8
		MEGF8	GPBP1L1
		METAP1	GPC4
		METTL16	GPD1L
		METTL3	GPD2
		MEX3A	GPHN
		MFN2	GPI
		MFSD14B	GPN1
		MGA	GPR107
		MGAT1	GPR180
		MGAT4B	GPRASP2
		MGAT5	GPRIN1
		MGME1	GPS1
		MIA3	GPT2
		MIB1	GPX1
		MICAL3	GPX8
		MICALL1	GRAMD1A
		MID1IP1	GRAMD4
		MIEF1	GRB10
		MIER1	GRB2
		MIGA1	GREB1L
		MIS12	GRINA
		MKI67	GRIPAP1
		MKLN1	GRK2
		MKNK1	GRK6
		MKNK2	GRSF1
		MKRN1	GRWD1
		MKRN2	GSE1
		MLEC	GSK3A
		MLLT1	GSK3B
		MLLT3	GSPT1
		MLLT6	GSTO1
		MLXIP	GTF2E2
		MMADHC	GTF2F1
		MMGT1	GTF2H2
		MOB4	GTF2I
		MOCS2	GTF2IRD1
		MON1B	GTF3A
		MON2	GTF3C1
		MORC2	GTF3C2
		MORF4L1	GTF3C3
		MORF4L2	GTF3C4
		MOV10	GTF3C5
		MPDU1	GTPBP1
		MPDZ	GTPBP3
		MPHOSPH8	GTPBP4
		MPP1	GTPBP6
		MPP2	GTSE1
		MPP6	GUCD1
		MPRIP	GUK1
		MPZL1	GUSB
		MRE11	GXYLT1
		MREG	GYG1
		MRFAP1	GYS1
		MRPL18	GZF1
		MRPL19	H1-0
		MRPL23	H1-10
		MRPL3	H2AZ2
		MRPL35	H3-3B
		MRPL37	HACD2
		MRPL40	HACD3
		MRPL45	HADH
		MRPL47	HADHA
		MRPL48	HADHB
		MRPL49	HARS2
		MRPL9	HAUS6
		MRPS12	HAX1
		MRPS14	HBS1L
		MRPS18A	HCFC1
		MRPS18B	HDAC1
		MRPS2	HDAC2
		MRPS27	HDAC3
		MRTO4	HDAC5
		MSH2	HDAC6
		MSH6	HDDC2
		MSL1	HDGF
		MSL3	HDGFL2
		MSN	HDGFL3
		MTA1	HDHD5
		MTA2	HDLBP
		MTAP	HEATR1
		MTARC1	HEATR3
		MTCH1	HEATR5B
		MTDH	HEATR6
		MTERF2	HECA
		MTF2	HECTD1
		MTHFD1	HECTD3
		MTHFD1L	HECTD4
		MTHFD2	HELLS
		MTHFR	HELZ
		MTM1	HERC1
		MTMR12	HERC2
		MTMR2	HERC3
		MTMR3	HERC4
		MTMR4	HERC5
		MTOR	HES4
		MTPN	HEXIM1
		MTR	HGH1
		MTREX	HGS
		MTSS2	HIBADH
		MTURN	HIC2
		MXD4	HIF1A
		MYBBP1A	HIF1AN
		MYBL2	HIGD1A
		MYC	HIGD2A
		MYCBP	HILPDA
		MYCBP2	HINT1
		MYH10	HINT3
		MYH9	HIP1
		MYO10	HIP1R
		MYO18A	HIPK1
		MYO1B	HIPK2
		MYO1D	HIRA
		MYO1E	HIRIP3
		MYO5A	HK1
		MYO9B	HK2
		N4BP1	HLA-C
		NAA15	HLA-E
		NAA20	HLCS
		NAA25	HLTF
		NAA30	HM13
		NAA40	HMBS
		NAA50	HMG20A
		NACA	HMGA1
		NACC1	HMGA2
		NACC2	HMGB1
		NADK	HMGB3
		NAP1L1	HMGCR
		NASP	HMGCS1
		NAT10	HMGN1
		NAT9	HMGN2
		NAXD	HMGXB3
		NBAS	HMMR
		NBN	HNRNPA0
		NBR1	HNRNPA1
		NCAPD2	HNRNPA2B1
		NCAPD3	HNRNPA3
		NCAPG	HNRNPAB
		NCAPH	HNRNPC
		NCAPH2	HNRNPDL
		NCBP1	HNRNPF
		NCBP2	HNRNPH1
		NCBP3	HNRNPH2
		NCDN	HNRNPH3
		NCKAP1	HNRNPK
		NCL	HNRNPL
		NCLN	HNRNPM
		NCOA4	HNRNPR
		NCOA5	HNRNPU
		NCOA6	HNRNPUL1
		NCOR1	HOMER2
		NCOR2	HOXA10
		NDC1	HOXB9
		NDFIP2	HOXD13
		NDRG3	HP1BP3
		NDST1	HPRT1
		NDUFAB1	HPS1
		NDUFB10	HPS3
		NDUFB9	HPS4
		NDUFV1	HPS5
		NECAP2	HRAS
		NECTIN1	HS2ST1
		NEIL3	HS6ST1
		NEK1	HS6ST2
		NEK2	HSBP1
		NEK4	HSD17B10
		NEK7	HSD17B4
		NEK9	HSDL1
		NELFB	HSDL2
		NELFCD	HSF1
		NEO1	HSF2
		NEU3	HSP90AA1
		NF1	HSP90AB1
		NF2	HSP90B1
		NFATC2IP	HSPA13
		NFATC3	HSPA1B
		NFE2L1	HSPA4
		NFRKB	HSPA4L
		NFX1	HSPA5
		NFYA	HSPA8
		NIBAN2	HSPA9
		NID1	HSPB11
		NIN	HSPBP1
		NIP7	HSPD1
		NIPA2	HSPH1
		NIPAL3	HTATSF1
		NIPBL	HTRA2
		NKAP	HTT
		NKAPD1	HUWE1
		NKIRAS2	HYOU1
		NKRF	IARS1
		NKTR	IARS2
		NLE1	IBA57
		NLN	IBTK
		NMD3	ICE1
		NMT1	ICMT
		NNT	IDE
		NOC2L	IDH1
		NOC3L	IDH3A
		NOL10	IDI1
		NOL11	IER5
		NOL6	IFNAR1
		NOL8	IFRD2
		NOLC1	IFT140
		NOMO1	IFT172
		NONO	IGF1R
		NOP53	IGF2BP1
		NOP56	IGF2BP3
		NOP58	IGF2R
		NOP9	IGFBP5
		NOTCH2	IGSF3
		NPEPPS	IK
		NPLOC4	IKBKB
		NPM1	IL13RA1
		NR2F2	IL6ST
		NR3C1	ILF3
		NRAS	ILKAP
		NRDC	ILRUN
		NRF1	ILVBL
		NRSN2	IMMT
		NSD1	IMP4
		NSD2	IMPACT
		NSD3	IMPDH1
		NSDHL	IMPDH2
		NSF	INA
		NSMCE4A	INAFM2
		NSMF	INCENP
		NT5C2	INF2
		NT5DC2	INO80
		NTN1	INO80E
		NUB1	INPP4A
		NUBP2	INPP5A
		NUCKS1	INPPL1
		NUDCD3	INSIG1
		NUDT12	INTS1
		NUDT16	INTS10
		NUDT21	INTS11
		NUDT3	INTS12
		NUFIP2	INTS13
		NUMA1	INTS3
		NUMB	INTS5
		NUP107	INTS7
		NUP133	IP6K1
		NUP153	IPO11
		NUP155	IPO13
		NUP160	IPO5
		NUP188	IPO7
		NUP205	IPO8
		NUP210	IPO9
		NUP214	IQCB1
		NUP50	IQGAP1
		NUP54	IQGAP2
		NUP62	IQGAP3
		NUP93	IQSEC1
		NUP98	IRAK1
		NUS1	IREB2
		NVL	IRF2BP2
		OAT	IRS4
		OBI1	ISCA1
		OBSL1	ISG20L2
		OCIAD1	IST1
		OCRL	ISYNA1
		ODC1	ITCH
		ODF2	ITGB1
		OGA	ITGB1BP1
		OGDH	ITM2C
		OGFR	ITPK1
		OGT	ITPR2
		OLA1	ITPRID2
		OPA1	ITSN1
		ORC3	IVD
		ORMDL3	IVNS1ABP
		OSBP	IWS1
		OSBPL11	JADE1
		OSBPL6	JADE3
		OSBPL8	JAK1
		OSBPL9	JAM3
		OSTC	JARID2
		OTUD4	JMJD4
		OTUD5	JMJD8
		OTUD7B	JMY
		OTULIN	JOSD1
		P4HB	JPT1
		PA2G4	JPT2
		PABPC1	JRK
		PABPC4	JUN
		PACSIN2	JUP
		PAFAH1B1	KANK2
		PAFAH1B2	KANSL3
		PAGR1	KARS1
		PAK1	KAT2A
		PAK2	KAT5
		PALD1	KAT6A
		PALLD	KAT7
		PALM2AKAP2	KAT8
		PAM	KATNB1
		PANK3	KATNIP
		PAPOLA	KBTBD6
		PAPSS1	KCNJ12
		PARD3	KCTD10
		PARG	KCTD12
		PARP1	KCTD15
		PARP4	KCTD17
		PATL1	KCTD2
		PATZ1	KCTD20
		PAWR	KCTD3
		PAXIP1	KCTD5
		PBRM1	KCTD7
		PBX1	KCTD9
		PC	KDELR1
		PCBP1	KDELR2
		PCCB	KDM1A
		PCF11	KDM1B
		PCM1	KDM2B
		PCMT1	KDM3B
		PCNP	KDM4A
		PCNT	KDM4B
		PCNX1	KDM5A
		PCNX4	KDM5B
		PCSK6	KDM5C
		PCSK7	KEAP1
		PCYOX1	KHDRBS1
		PCYT1A	KHK
		PDCD11	KHNYN
		PDCD2	KHSRP
		PDCD6IP	KIAA0100
		PDCD7	KIAA0232
		PDE4DIP	KIAA0319L
		PDHA1	KIAA0586
		PDHB	KIAA0895
		PDIA3	KIAA0930
		PDK3	KIAA1191
		PDLIM5	KIAA1522
		PDPK1	KIAA1671
		PDPR	KIDINS220
		PDS5A	KIF11
		PDXDC1	KIF13A
		PDXK	KIF14
		PEA15	KIF15
		PEBP1	KIF1B
		PEDS1	KIF1C
		PEF1	KIF20A
		PELO	KIF20B
		PELP1	KIF22
		PERP	KIF26A
		PES1	KIF2A
		PEX19	KIF2C
		PEX5	KIF3B
		PFAS	KIF4A
		PFDN1	KIF5B
		PFKFB2	KIF5C
		PFKFB3	KIF7
		PFKM	KIFAP3
		PFN2	KIFC1
		PGAM1	KIN
		PGD	KIRREL1
		PGM1	KIZ
		PGM2	KLC2
		PHAX	KLF13
		PHB2	KLF9
		PHC2	KLHDC10
		PHF10	KLHDC3
		PHF13	KLHL12
		PHF2	KLHL15
		PHF20	KLHL18
		PHF20L1	KLHL21
		PHF3	KLHL23
		PHF6	KLHL42
		PHF8	KLHL5
		PHIP	KLHL8
		PHKA1	KLHL9
		PHKB	KMT2A
		PHLDA3	KMT2B
		PHRF1	KMT2C
		PI4KA	KMT2D
		PI4KB	KMT2E
		PIAS4	KMT5A
		PICALM	KNL1
		PIEZO1	KNOP1
		PIGA	KNTC1
		PIGH	KPNA1
		PIGS	KPNA3
		PIK3C2A	KPNA4
		PIK3R3	KPNA6
		PIK3R4	KPNB1
		PIKFYVE	KRAS
		PIM3	KREMEN1
		PIP4K2B	KRI1
		PIP4K2C	KRR1
		PIP5K1A	KRT10
		PITPNA	KRT18
		PITPNB	KTN1
		PITRM1	L3MBTL2
		PITX1	LAMB1
		PJA1	LAMC1
		PJA2	LAMP1
		PKM	LAMTOR1
		PKMYT1	LAMTOR4
		PKN1	LANCL1
		PKN2	LAP3
		PLAA	LARP1
		PLAGL2	LARP4
		PLCG1	LARP4B
		PLEKHA8	LARS1
		PLEKHB2	LARS2
		PLEKHM2	LAS1L
		PLK1	LASP1
		PLRG1	LBR
		PLS3	LCOR
		PLXNA1	LDB1
		PLXNB2	LDHA
		PM20D2	LEMD2
		PMAIP1	LEO1
		PMPCA	LETM1
		PMPCB	LGMN
		PNMA1	LGR4
		PNMA8A	LIG1
		PNN	LIG3
		PNO1	LIMD1
		PNPLA6	LIMK1
		PNRC2	LIMK2
		POFUT1	LIN28B
		POGK	LIPA
		POGLUT2	LLGL1
		POGLUT3	LMAN1
		POLA1	LMAN2
		POLA2	LMBR1
		POLD1	LMNA
		POLD2	LMNB1
		POLD3	LMNB2
		POLDIP2	LMTK2
		POLDIP3	LONP1
		POLE	LPCAT1
		POLE3	LPGAT1
		POLG	LPIN1
		POLR1A	LPIN2
		POLR1B	LRATD2
		POLR1D	LRBA
		POLR1F	LRIG1
		POLR2A	LRP10
		POLR2B	LRP3
		POLR2D	LRP5
		POLR2E	LRP8
		POLR3A	LRPAP1
		POLR3B	LRPPRC
		POLR3D	LRRC41
		POLR3E	LRRC47
		POLR3H	LRRC58
		POLRMT	LRRC59
		POM121	LRRC8A
		POM121C	LRRFIP1
		POMGNT1	LSG1
		POMT2	LSM10
		POP1	LSM11
		POU2F1	LSM14A
		POU3F2	LSM14B
		POU4F1	LSM2
		PPA1	LSM4
		PPARGC1B	LSM5
		PPAT	LSS
		PPFIA1	LTA4H
		PPIF	LTN1
		PPIG	LUC7L
		PPIH	LUC7L2
		PPM1F	LUC7L3
		PPM1H	LUZP1
		PPME1	LY6E
		PPP1R10	LYPD1
		PPP1R12A	LYPLA1
		PPP1R15B	LYPLA2
		PPP1R8	LYRM1
		PPP1R9B	LYRM7
		PPP2R1A	LYSMD3
		PPP2R1B	LZTR1
		PPP2R5C	LZTS3
		PPP2R5D	MACF1
		PPP2R5E	MACIR
		PPP3CB	MACO1
		PPP3R1	MACROH2A1
		PPP4R3A	MAD2L1
		PPP4R3B	MADD
		PPP5C	MAF1
		PPP6R1	MAGED1
		PPP6R2	MAGED2
		PPP6R3	MAGI3
		PPRC1	MAML1
		PPWD1	MAN1A2
		PRCC	MAN1B1
		PRDM4	MAN2B1
		PRDX4	MANEA
		PRDX6	MANEAL
		PREB	MAP1B
		PRELID1	MAP1LC3B
		PREPL	MAP2K1
		PRKAB2	MAP2K2
		PRKACB	MAP2K3
		PRKAR1A	MAP2K4
		PRKAR2A	MAP2K7
		PRKCA	MAP3K11
		PRKCI	MAP3K3
		PRKCSH	MAP3K4
		PRKD3	MAP3K7
		PRKDC	MAP4
		PRKRA	MAP4K4
		PRKRIP1	MAP7
		PRKX	MAP7D1
		PRMT2	MAP7D2
		PRMT5	MAP7D3
		PRMT6	MAPK1
		PRMT7	MAPK14
		PROSER1	MAPK1IP1L
		PRPF19	MAPK6
		PRPF3	MAPK8IP1
		PRPF31	MAPK8IP2
		PRPF38A	MAPK9
		PRPF38B	MAPKAP1
		PRPF4	MAPKAPK2
		PRPF40A	MAPKAPK3
		PRPF4B	MAPKAPK5
		PRPF6	MAPRE1
		PRPF8	MAPRE2
		PRPS1	MARCHF5
		PRR14L	MARCHF6
		PRRC1	MARCHF7
		PRRC2A	MARCHF8
		PRRC2C	MARCKSL1
		PSAT1	MARF1
		PSEN1	MARK2
		PSIP1	MARK3
		PSKH1	MARS1
		PSMA4	MARS2
		PSMB1	MARVELD1
		PSMB4	MAST2
		PSMB5	MAT2A
		PSMC1	MATR3
		PSMC4	MAU2
		PSMC5	MAVS
		PSMC6	MAZ
		PSMD1	MBD1
		PSMD13	MBD3
		PSMD14	MBNL1
		PSMD2	MBNL3
		PSMD3	MBOAT7
		PSMD4	MBTD1
		PSMD8	MBTPS1
		PSME3	MBTPS2
		PSME3IP1	MCCC2
		PSME4	MCFD2
		PSMG3	MCL1
		PSRC1	MCM10
		PTBP1	MCM2
		PTBP3	MCM3
		PTDSS1	MCM3AP
		PTGES3	MCM4
		PTGFRN	MCM5
		PTK2	MCM6
		PTK7	MCM7
		PTMA	MCM9
		PTP4A2	MCMBP
		PTPA	MCRS1
		PTPN1	MDC1
		PTPN11	MDH1
		PTPN13	MDH2
		PTPN14	MDM2
		PTPN18	MDN1
		PTPN23	ME1
		PTPRA	MEA1
		PTPRF	MEAK7
		PTPRS	MECOM
		PTPRU	MECP2
		PTTG1IP	MED12
		PUM1	MED13L
		PUM2	MED14
		PUSL1	MED20
		PXN	MED22
		PYCR2	MED23
		PYGB	MED24
		PYGL	MED28
		PYGO2	MED29
		QARS1	MEGF8
		QSER1	MEN1
		QSOX1	MET
		QSOX2	METAP1
		R3HCC1	METTL16
		R3HDM1	METTL3
		RAB10	METTL9
		RAB11A	MFAP1
		RAB11FIP1	MFAP3
		RAB11FIP3	MFF
		RAB11FIP4	MFN1
		RAB14	MFN2
		RAB1A	MFSD1
		RAB1B	MFSD12
		RAB31	MFSD14B
		RAB35	MGA
		RAB3GAP1	MGAT1
		RAB3GAP2	MGAT2
		RAB5B	MGAT4B
		RABL6	MGAT5
		RAC1	MGME1
		RAC3	MGST3
		RACGAP1	MIA3
		RAD17	MIB1
		RAD18	MICAL3
		RAD21	MICALL1
[truncated: 2,210 more rows]

## Sheet: Sheet 5
sc-LSM14A-TRIBE-ID	Downsampled sc-LSM14A-TRIBE-ID
AAAS	AAAS
AAGAB	AAGAB
AARS1	AAMP
AASDHPPT	AARS1
AASS	AARS2
AATF	AASDHPPT
ABCB10	AATF
ABCB8	ABCB10
ABCC1	ABCC1
ABCC4	ABCC4
ABCE1	ABCE1
ABCF1	ABCF1
ABCG2	ABCG2
ABHD10	ABHD17B
ABHD17B	ABHD4
ABHD4	ABI1
ABI1	ABL1
ABITRAM	ABLIM1
ABL1	ABRAXAS1
ABLIM1	ABRAXAS2
ABR	ABT1
ABRAXAS1	ABTB2
ABRAXAS2	AC069544.1
ABT1	ACACA
ABTB2	ACADM
ACAA2	ACAT2
ACAD8	ACD
ACADM	ACIN1
ACAT2	ACLY
ACBD6	ACOT1
ACD	ACOT13
ACIN1	ACOT2
ACLY	ACOT7
ACOT1	ACOT8
ACOT13	ACOT9
ACOT2	ACOX1
ACOT7	ACP1
ACOT8	ACSL1
ACOT9	ACSL3
ACOX1	ACSL4
ACP1	ACSS1
ACP6	ACTA2
ACSL1	ACTB
ACSL3	ACTG1
ACSL4	ACTL6A
ACSS1	ACTN1
ACTA2	ACTN4
ACTB	ACTR1A
ACTG1	ACTR1B
ACTL6A	ACTR2
ACTN1	ACTR3
ACTN4	ACTR3B
ACTR1A	ACYP1
ACTR1B	ADAM10
ACTR2	ADAR
ACTR3	ADARB1
ACTR3B	ADAT2
ACTR5	ADCK2
ACYP1	ADCY3
ADAM10	ADD1
ADAR	ADD2
ADARB1	ADD3
ADAT2	ADGRL2
ADCK2	ADGRL3
ADD1	ADH5
ADD2	ADI1
ADD3	ADIPOR1
ADGRL1	ADIPOR2
ADGRL2	ADM
ADGRL3	ADNP
ADH5	ADNP2
ADI1	ADPRHL1
ADIPOR1	ADPRS
ADIPOR2	ADSS2
ADNP	AEBP2
ADNP2	AEN
ADO	AFDN
ADPRHL1	AFF1
ADPRS	AFF4
AEBP2	AGFG1
AEN	AGGF1
AFDN	AGO1
AFF3	AGO2
AFF4	AGPAT2
AGAP3	AGPAT3
AGGF1	AHCTF1
AGO1	AHCY
AGO3	AHNAK
AGPAT2	AIFM1
AGPS	AIMP1
AHCTF1	AK4
AHCY	AK6
AHNAK	AKAP11
AIFM1	AKAP12
AIMP1	AKAP13
AK4	AKAP8L
AK6	AKIP1
AKAP1	AKIRIN2
AKAP11	AKR1B1
AKAP12	AKT3
AKAP13	AKTIP
AKAP8	ALDH18A1
AKAP8L	ALDH1B1
AKIP1	ALDH3A2
AKIRIN1	ALDH4A1
AKIRIN2	ALDH7A1
AKR1A1	ALG10
AKR1B1	ALG13
AKT3	ALG14
AKTIP	ALG3
ALDH18A1	ALG5
ALDH1B1	ALG6
ALDH3A2	ALG8
ALDH7A1	ALKBH3
ALG1	ALKBH5
ALG10	ALKBH8
ALG13	ALMS1
ALG3	ALX1
ALG5	AMD1
ALG6	AMFR
ALG8	AMOT
ALKBH2	AMOTL1
ALKBH3	AMZ2
ALKBH4	ANAPC1
ALKBH5	ANAPC13
ALKBH8	ANAPC16
ALX1	ANAPC2
AMBRA1	ANAPC4
AMD1	ANAPC5
AMER1	ANK3
AMFR	ANKFY1
AMOT	ANKLE2
AMZ2	ANKMY2
ANAPC1	ANKRD11
ANAPC10	ANKRD12
ANAPC13	ANKRD13C
ANAPC16	ANKRD17
ANAPC2	ANKRD28
ANAPC4	ANKRD49
ANAPC5	ANKRD50
ANK3	ANKRD52
ANKFY1	ANKRD9
ANKLE2	ANLN
ANKRD12	ANO6
ANKRD13C	ANP32A
ANKRD17	ANP32B
ANKRD28	ANP32E
ANKRD44	ANTXR1
ANKRD49	ANXA2
ANKRD50	ANXA6
ANKRD52	ANXA7
ANKRD54	AP1B1
ANKRD9	AP1G1
ANKS1A	AP1M1
ANLN	AP2B1
ANO6	AP3B1
ANP32A	AP3M1
ANP32B	AP3M2
ANTXR1	AP4B1
ANXA2	AP4S1
ANXA4	AP5M1
ANXA6	APBB1
ANXA7	API5
AP1B1	APLP2
AP1G1	APOBEC3B
AP1M1	APOL2
AP1S1	APOLD1
AP2B1	APOO
AP3B1	APP
AP3M1	APPL1
AP3M2	APPL2
AP3S1	ARCN1
AP5B1	AREL1
AP5M1	ARF1
APBB1	ARF5
API5	ARF6
APLP2	ARFGEF1
APOBEC3B	ARFGEF2
APOL2	ARFIP1
APOLD1	ARFIP2
APOO	ARHGAP17
APP	ARHGAP35
APPL1	ARHGEF18
APPL2	ARHGEF2
AQR	ARID1A
ARCN1	ARID2
AREL1	ARID3A
ARF1	ARID3B
ARF5	ARID4A
ARF6	ARID4B
ARFGAP2	ARID5B
ARFGEF1	ARL1
ARFGEF2	ARL13B
ARFIP1	ARL14EP
ARFIP2	ARL3
ARHGAP17	ARL4A
ARHGAP35	ARL5B
ARHGEF18	ARL6
ARHGEF2	ARL6IP1
ARID1A	ARL8A
ARID2	ARMC1
ARID3A	ARMC6
ARID3B	ARMC8
ARID4A	ARMCX3
ARID4B	ARMCX5
ARID5B	ARMCX6
ARL1	ARMH3
ARL14EP	ARMH4
ARL3	ARMT1
ARL4A	ARNT
ARL6	ARNTL2
ARL6IP1	ARPC2
ARL6IP5	ARPC3
ARL8B	ARPC5
ARMC1	ARPC5L
ARMC6	ARPP19
ARMC8	ARV1
ARMC9	ASAP1
ARMCX3	ASB3
ARMCX5	ASB8
ARMCX6	ASCC3
ARMH3	ASF1A
ARMH4	ASF1B
ARMT1	ASH1L
ARNT	ASH2L
ARNTL2	ASNSD1
ARPC2	ASPH
ARPC3	ASPM
ARPC4	ASXL1
ARPC5	ASXL2
ARPC5L	ASXL3
ARPP19	ATAD1
ARRDC4	ATAD2
ARV1	ATAD3A
ASAP1	ATF2
ASB3	ATF3
ASB8	ATF4
ASCC3	ATF6
ASF1A	ATG13
ASF1B	ATG3
ASH1L	ATG4A
ASH2L	ATG4B
ASNSD1	ATG4C
ASPH	ATG4D
ASPHD2	ATG5
ASPM	ATG7
ASTE1	ATIC
ASXL1	ATL3
ASXL2	ATP13A1
ASXL3	ATP13A2
ATAD1	ATP13A3
ATAD2	ATP1A1
ATAD3A	ATP1B3
ATF2	ATP2B1
ATF3	ATP2B4
ATF4	ATP5F1A
ATF6	ATP5F1B
ATF7	ATP5F1E
ATF7IP	ATP5MC2
ATG13	ATP5ME
ATG3	ATP5MG
ATG4A	ATP5PB
ATG4B	ATP5PD
ATG4C	ATP5PF
ATG4D	ATP6AP2
ATG5	ATP6V0A1
ATG7	ATP6V0D1
ATIC	ATP6V1A
ATL3	ATP6V1B2
ATMIN	ATP6V1C1
ATP13A1	ATP6V1G1
ATP13A2	ATP8B2
ATP1A1	ATPAF1
ATP1B3	ATR
ATP2B1	ATRIP
ATP2B4	ATRX
ATP5F1A	ATXN10
ATP5F1B	ATXN2L
ATP5IF1	ATXN3
ATP5MC2	ATXN7L3
ATP5PB	ATXN7L3B
ATP5PD	AUNIP
ATP5PF	AURKA
ATP6AP1	AURKAIP1
ATP6AP2	AURKB
ATP6V0A1	AXIN1
ATP6V0D1	AZIN1
ATP6V1A	B3GALNT2
ATP6V1B2	B3GAT3
ATP6V1C1	B9D1
ATP6V1E1	BACH1
ATP6V1G1	BAG4
ATP7B	BAG5
ATP8B2	BANF1
ATPAF1	BANP
ATRIP	BAP1
ATRX	BAZ1A
ATXN1	BAZ1B
ATXN2L	BAZ2A
ATXN3	BAZ2B
ATXN7L3	BBS12
ATXN7L3B	BBS4
AUNIP	BBX
AUP1	BCAP31
AURKA	BCAR1
AURKAIP1	BCAS2
AURKB	BCAT1
AXIN1	BCCIP
AZIN1	BCL10
B2M	BCL11A
B3GALNT2	BCL2L12
B3GAT3	BCL7A
B9D1	BCL7B
BABAM2	BCOR
BACH1	BCORL1
BAG1	BCR
BAG4	BDP1
BAG5	BET1
BANF1	BFAR
BANP	BICD2
BAP1	BIN3
BAZ1A	BIRC2
BAZ1B	BIRC5
BAZ2A	BIRC6
BAZ2B	BLCAP
BBS12	BLM
BBS4	BLMH
BBX	BLOC1S3
BCAP31	BLOC1S5
BCAR1	BLVRA
BCAS2	BLVRB
BCCIP	BLZF1
BCL10	BMI1
BCL11A	BMP2K
BCL2L12	BMP4
BCL7B	BMP7
BCOR	BMPR2
BCORL1	BMS1
BDH1	BOD1
BDP1	BORA
BECN1	BPNT2
BEND4	BRAP
BET1	BRAT1
BICD2	BRCA2
BIN3	BRCC3
BIRC2	BRD2
BIRC5	BRD3
BIRC6	BRD4
BLCAP	BRD7
BLM	BRD8
BLMH	BRD9
BLOC1S3	BRF2
BLOC1S5	BRI3BP
BLVRA	BRIX1
BLVRB	BRMS1L
BLZF1	BRWD3
BMI1	BSDC1
BMP4	BSG
BMPR2	BTAF1
BMS1	BTBD1
BNIP3	BTBD7
BOD1	BTF3L4
BOP1	BTG1
BORA	BTG2
BPNT2	BTG3
BRAP	BUD31
BRAT1	BYSL
BRCA2	BZW1
BRCC3	BZW2
BRD2	C11orf58
BRD3	C11orf68
BRD4	C11orf95
BRD7	C12orf29
BRD8	C12orf4
BRD9	C12orf43
BRF2	C12orf45
BRI3BP	C12orf65
BRIX1	C12orf73
BRMS1L	C14orf119
BRWD3	C15orf39
BSDC1	C16orf87
BSG	C16orf91
BTAF1	C18orf21
BTBD1	C1D
BTBD10	C1GALT1C1
BTBD3	C1orf109
BTBD7	C1orf131
BTF3L4	C1orf174
BTG1	C1orf35
BTG2	C1orf43
BTG3	C20orf27
BTRC	C20orf96
BUD31	C21orf91
BYSL	C2orf69
BZW1	C2orf76
BZW2	C3orf14
C11orf58	C3orf38
C11orf68	C4orf3
C11orf95	C5orf34
C12orf29	C6orf62
C12orf4	C6orf89
C12orf43	C8orf33
C12orf45	C9orf78
C12orf65	CA11
C12orf66	CAAP1
C12orf73	CACNA2D1
C14orf119	CACYBP
C15orf39	CAD
C16orf87	CADM1
C16orf91	CALM1
C17orf58	CALU
C18orf21	CAMK4
C19orf47	CAMKK2
C1D	CAMLG
C1GALT1C1	CAMSAP1
C1orf109	CAMSAP2
C1orf131	CAND1
C1orf174	CANT1
C1orf35	CANX
C1orf43	CAP1
C20orf27	CAPRIN1
C20orf96	CAPZA1
C21orf91	CAPZA2
C2orf68	CAPZB
C2orf76	CARD8
C3orf14	CARNMT1
C3orf38	CASP3
C4orf3	CASP7
C5orf15	CASP8AP2
C5orf34	CAST
C6orf62	CASTOR2
C6orf89	CAT
C7orf50	CAV2
C8orf33	CBLL1
C9orf78	CBR4
CA11	CBWD1
CAAP1	CBWD2
CABIN1	CBWD5
CABLES2	CBX1
CACNA2D1	CBX2
CACYBP	CBX5
CAD	CBX6
CADM1	CCAR2
CALD1	CCDC117
CALM1	CCDC124
CALU	CCDC125
CAMK2D	CCDC138
CAMK2G	CCDC174
CAMK4	CCDC18
CAMKK2	CCDC181
CAMLG	CCDC28A
CAMSAP1	CCDC28B
CAMSAP2	CCDC34
CAND1	CCDC43
CANT1	CCDC47
CANX	CCDC59
CAP1	CCDC6
CAPRIN1	CCDC71L
CAPZA1	CCDC77
CAPZA2	CCDC82
CAPZB	CCDC86
CARD8	CCDC88A
CARM1	CCDC90B
CARNMT1	CCDC92
CASC3	CCDC93
CASP3	CCDC97
CASP7	CCM2
CASP8AP2	CCNA2
CAST	CCNB1IP1
CASTOR2	CCNB2
CAV2	CCNC
CBLL1	CCND2
CBR4	CCND3
CBWD1	CCNF
CBWD2	CCNG1
CBWD5	CCNO
CBX1	CCNQ
CBX2	CCNT1
CBX3	CCNT2
CBX5	CCP110
CBX6	CCSAP
CCAR2	CCT2
CCDC117	CCT3
CCDC124	CCT4
CCDC125	CCT5
CCDC138	CCT6A
CCDC174	CCT7
CCDC18	CCT8
CCDC181	CD151
CCDC25	CD164
CCDC28A	CD2AP
CCDC28B	CD2BP2
CCDC34	CD46
CCDC43	CD59
CCDC47	CD63
CCDC51	CD81
CCDC59	CDADC1
CCDC6	CDC123
CCDC66	CDC14B
CCDC71L	CDC20
CCDC77	CDC23
CCDC82	CDC25A
CCDC86	CDC25C
CCDC87	CDC26
CCDC88A	CDC27
CCDC90B	CDC34
CCDC92	CDC37
CCDC97	CDC40
CCM2	CDC42EP1
CCN1	CDC42SE1
CCNA2	CDC45
CCNB2	CDC5L
CCNC	CDC6
CCND1	CDC7
CCND2	CDC73
CCND3	CDCA2
CCNF	CDCA3
CCNG1	CDCA4
CCNO	CDCA5
CCNQ	CDCA7
CCNT1	CDCA7L
CCNT2	CDCA8
CCP110	CDH2
CCSAP	CDIN1
CCT2	CDIP1
CCT3	CDK1
CCT4	CDK10
CCT5	CDK12
CCT6A	CDK13
CCT7	CDK2
CCT8	CDK2AP2
CD164	CDK5RAP2
CD2AP	CDK6
CD2BP2	CDK7
CD302	CDK8
CD46	CDKAL1
CD59	CDKN1A
CD63	CDKN1B
CD81	CDT1
CD83	CDV3
CD99L2	CEBPG
CDC123	CEBPZ
CDC14B	CECR2
CDC20	CEL
CDC23	CELF1
CDC25A	CEMIP2
CDC25C	CENPC
CDC26	CENPE
CDC27	CENPF
CDC34	CENPJ
CDC37	CENPK
CDC40	CENPL
CDC42	CENPO
CDC42SE1	CENPQ
CDC45	CENPT
CDC5L	CENPU
CDC6	CENPV
CDC7	CEP170
CDCA2	CEP192
CDCA3	CEP295
CDCA4	CEP350
CDCA5	CEP41
CDCA7	CEP57L1
CDCA7L	CEP68
CDCA8	CEP78
CDH2	CEP85
CDIN1	CEP97
CDIP1	CEPT1
CDK1	CERK
CDK12	CERS2
CDK13	CERS5
CDK2	CES2
CDK2AP2	CETN2
CDK5RAP1	CFAP70
CDK5RAP2	CFL2
CDK6	CGGBP1
CDK7	CHAC2
CDK8	CHAF1A
CDKAL1	CHAF1B
CDKN1A	CHAMP1
CDKN1B	CHCHD3
CDT1	CHCHD4
CDV3	CHCHD7
CDX2	CHD1
CDYL	CHD3
CEBPG	CHD6
CEBPZ	CHD7
CEL	CHD8
CELF1	CHD9
CELSR1	CHERP
CELSR2	CHIC2
CEMIP2	CHID1
CENPC	CHM
CENPE	CHMP2A
CENPF	CHMP5
CENPK	CHORDC1
CENPL	CHPF
CENPO	CHPT1
CENPQ	CHRAC1
CENPT	CHST12
CENPU	CHST14
CENPV	CHSY1
CEP128	CHUK
CEP170	CIAO1
CEP170B	CIAO2A
CEP192	CIAPIN1
CEP250	CILK1
CEP295	CINP
CEP350	CIR1
CEP41	CIRBP
CEP57L1	CIZ1
CEP68	CKAP2
CEP78	CKAP2L
CEP85	CKAP4
CEPT1	CKAP5
CERK	CKS1B
CERS2	CLASP1
CERS5	CLASRP
CERT1	CLCC1
CES2	CLCN3
CETN2	CLDN12
CFL2	CLDND1
CGGBP1	CLIC1
CGRRF1	CLIC4
CHAC2	CLIP1
CHAF1A	CLK1
CHAF1B	CLK3
CHAMP1	CLNS1A
CHCHD3	CLOCK
CHCHD4	CLPB
CHCHD7	CLPP
CHD1	CLSPN
CHD3	CLTA
CHD6	CLTB
CHD7	CLTC
CHD8	CMBL
CHD9	CMPK1
CHEK2	CMSS1
CHERP	CMTM3
CHIC2	CMTM6
CHM	CMTM7
CHMP1A	CMTR1
CHMP2A	CNBP
CHMP5	CNEP1R1
CHORDC1	CNIH1
CHPT1	CNIH4
CHRAC1	CNN3
CHST12	CNOT1
CHST14	CNOT10
CHST3	CNOT2
CHSY1	CNOT3
CHUK	CNOT4
CIAO1	CNOT6
CIAO2A	CNOT7
CIAPIN1	CNOT8
CIB1	CNOT9
CINP	CNP
CIP2A	CNPPD1
CIR1	CNPY3
CIRBP	CNRIP1
CIZ1	COA1
CKAP2	COA4
CKAP4	COA6
CKAP5	COA7
CKS1B	COASY
CLASP1	COG3
CLASRP	COG5
CLCC1	COG7
CLCN3	COG8
CLDN12	COIL
CLDND1	COLGALT1
CLIC1	COMMD10
CLIC4	COMMD8
CLIP1	COMTD1
CLK1	COP1
CLK3	COPA
CLK4	COPB1
CLNS1A	COPB2
CLOCK	COPG1
CLP1	COPG2
CLPB	COPS2
CLPP	COPS3
CLSPN	COPS4
CLTA	COPS5
CLTB	COPS8
CLTC	COPZ1
CLUAP1	COQ4
CMBL	COQ5
CMPK1	COQ9
CMSS1	COTL1
CMTM3	COX11
CMTM6	COX15
CMTM7	COX19
CMTR1	COX4I1
CNBP	COX5B
CNEP1R1	COX7A2L
CNIH1	COX7C
CNIH4	CPD
CNN3	CPEB4
CNOT1	CPLANE1
CNOT10	CPNE1
CNOT2	CPNE3
CNOT3	CPS1
CNOT4	CPSF1
CNOT7	CPSF3
CNOT8	CPSF6
CNOT9	CPT2
CNP	CPVL
CNPPD1	CRADD
CNRIP1	CRCP
CNST	CREB1
COA1	CREB3
COA3	CRKL
COA4	CRLF3
COA6	CRNKL1
COA7	CROT
COASY	CRYZL1
COG3	CS
COG5	CSE1L
COG7	CSNK1A1
COG8	CSNK1G2
COIL	CSNK2A1
COLGALT1	CSNK2A2
COMMD10	CSRP2
COMMD8	CSTF1
COMT	CSTF2T
COMTD1	CSTF3
COP1	CTC1
COPA	CTDNEP1
COPB1	CTDSP2
COPB2	CTDSPL2
COPG1	CTNNA1
COPG2	CTNNAL1
COPS2	CTNNB1
COPS3	CTNNBIP1
COPS4	CTNNBL1
COPS5	CTNND1
COPS8	CTPS1
COPZ1	CTPS2
COQ4	CTR9
COQ5	CTSA
COQ9	CTSF
CORO1B	CTSV
CORO1C	CTTN
COTL1	CTTNBP2NL
COX11	CUL1
COX15	CUL2
COX5B	CUL3
COX7A2L	CUL4A
COX7C	CUL4B
CPD	CUL5
CPEB4	CUTA
CPNE1	CWC15
CPNE3	CWC22
CPSF1	CWC25
CPSF3	CWC27
CPSF6	CWF19L1
CPSF7	CXXC1
CPT2	CXXC5
CPVL	CYB5RL
CRADD	CYBA
CRCP	CYBC1
CREB3	CYC1
CRKL	CYLD
CRLF3	DACH1
CRNKL1	DAD1
CROT	DAP3
CRYZL1	DAPK1
CS	DARS1
CSE1L	DARS2
CSNK1A1	DAXX
CSNK1G2	DAZAP1
CSNK2A1	DBF4
CSNK2A2	DBI
CSNK2B	DBN1
CSRP2	DCAF10
CSTF1	DCAF4
CSTF2T	DCAF5
CSTF3	DCAF6
CTC1	DCAF7
CTDNEP1	DCAF8
CTDSP2	DCBLD1
CTDSPL2	DCK
CTNNA1	DCLRE1B
CTNNAL1	DCP1A
CTNNB1	DCP2
CTNNBIP1	DCTD
CTNNBL1	DCTN1
CTNND1	DCTN2
CTPS1	DCTN4
CTPS2	DCTN5
CTR9	DCTPP1
CTSA	DCUN1D3
CTSB	DCUN1D4
CTSV	DCUN1D5
CTTN	DCXR
CTTNBP2NL	DDA1
CUL1	DDB1
CUL2	DDHD2
CUL3	DDIAS
CUL4A	DDIT4
CUL4B	DDOST
CUL5	DDX1
CUTA	DDX10
CUTC	DDX18
CWC15	DDX20
CWC22	DDX21
CWC25	DDX23
CWC27	DDX24
CXorf38	DDX27
CXorf56	DDX39A
CXXC1	DDX3X
CXXC5	DDX46
CYB5R4	DDX49
CYB5RL	DDX50
CYBA	DDX51
CYBC1	DDX56
CYC1	DEAF1
CYFIP1	DEDD
CYLD	DEGS1
CYSTM1	DENND10
DAAM1	DENND4A
DACH1	DENND4B
DAP3	DENND4C
DAPK3	DENR
DARS1	DEPDC1
DARS2	DEPDC1B
DAXX	DEPDC7
DAZAP1	DGKZ
DAZAP2	DHCR7
DBF4	DHRS11
DBN1	DHRS7
DBR1	DHRS7B
DCAF10	DHX15
DCAF13	DHX16
DCAF15	DHX29
DCAF5	DHX30
DCAF6	DHX34
DCAF7	DHX35
DCAF8	DHX36
DCBLD1	DHX37
DCK	DHX40
DCLRE1B	DHX57
DCP1A	DHX8
DCP1B	DHX9
DCP2	DIAPH1
DCPS	DICER1
DCTD	DIDO1
DCTN2	DIP2A
DCTN4	DIPK1B
DCTN5	DIS3
DCTPP1	DIS3L
DCUN1D3	DISP1
DCUN1D4	DKC1
DCUN1D5	DLC1
DDA1	DLD
DDB1	DLG5
DDHD2	DLGAP5
DDIAS	DLK2
DDIT4	DLST
DDOST	DLX1
DDX1	DMAC2
DDX10	DMAP1
DDX18	DMD
DDX20	DMKN
DDX21	DMXL1
DDX23	DNA2
DDX24	DNAAF5
DDX27	DNAJA1
DDX39A	DNAJA2
DDX3X	DNAJA3
DDX42	DNAJB1
DDX46	DNAJB11
DDX49	DNAJB12
DDX50	DNAJB14
DDX56	DNAJB4
DEAF1	DNAJC10
DEDD	DNAJC18
DEF8	DNAJC3
DEGS1	DNAJC8
DENND10	DNAJC9
DENND4A	DNM1L
DENND4B	DNM2
DENND4C	DNMT1
DENR	DNMT3A
DEPDC1	DNTTIP1
DEPDC1B	DNTTIP2
DEPDC7	DOCK7
DGKZ	DONSON
DHCR7	DOT1L
DHRS1	DPAGT1
DHRS11	DPCD
DHRS7	DPF2
DHRS7B	DPH3
DHRSX	DPH5
DHX15	DPH7
DHX16	DPP8
DHX29	DPP9
DHX30	DPY19L1
DHX34	DPYSL5
DHX35	DRG1
DHX36	DSC2
DHX38	DSCC1
DHX40	DSG2
DHX57	DSN1
DHX8	DSP
DHX9	DST
DIAPH1	DSTN
DICER1	DTD1
DIDO1	DTL
DIP2A	DTNA
DIPK1B	DTYMK
DIS3	DUS2
DIS3L	DUSP1
DISP1	DUSP11
DKC1	DUSP12
DLD	DUSP14
DLG5	DUSP7
DLGAP5	DUT
DLK2	DXO
DLST	DYM
DLX1	DYNC1H1
DMAC2	DYNC1I2
DMAP1	DYNC1LI1
DMD	DYNC1LI2
DMKN	DYNC2I2
DMXL1	DYNC2LI1
DNA2	DYNLL2
DNAAF5	DYRK4
DNAJA1	E2F1
DNAJA2	E2F3
DNAJA3	E2F4
DNAJB1	EAF2
DNAJB11	EBNA1BP2
DNAJB12	EBP
DNAJB14	EBPL
DNAJB4	ECD
DNAJB6	ECE1
DNAJC10	ECHS1
DNAJC18	ECI2
DNAJC19	ECPAS
DNAJC2	ECSIT
DNAJC30	ECT2
DNAJC5	EDC3
DNAJC7	EDC4
DNAJC9	EDEM2
DNM1L	EDRF1
DNM2	EEA1
DNMT1	EEF1A2
DNMT3A	EEF1B2
DNTTIP1	EEF1D
DNTTIP2	EEF1E1
DOCK4	EEF2
DOCK7	EFL1
DONSON	EFNA4
DOT1L	EHBP1
DPAGT1	EHD4
DPCD	EHMT1
DPF2	EHMT2
DPH3	EID2B
DPH5	EIF1
DPH7	EIF1AX
DPP3	EIF2A
DPP8	EIF2AK1
DPP9	EIF2B1
DPY19L1	EIF2B2
DPYSL5	EIF2B3
DRG1	EIF2B4
DSC2	EIF2B5
DSCC1	EIF2D
DSG2	EIF2S1
DSN1	EIF2S2
DSP	EIF3A
DST	EIF3B
DSTN	EIF3C
DTD1	EIF3D
DTL	EIF3F
DTNA	EIF3G
DTYMK	EIF3K
DUS2	EIF3L
DUSP1	EIF3M
DUSP11	EIF4A2
DUSP12	EIF4B
DUSP14	EIF4E
DUSP3	EIF4E2
DUSP7	EIF4ENIF1
DUT	EIF4G1
DVL2	EIF4G2
DXO	EIF4H
DYM	EIF5
DYNC1H1	EIPR1
DYNC1I2	ELAC2
DYNC1LI1	ELF1
DYNC1LI2	ELF4
DYNC2I2	ELMOD2
DYNC2LI1	ELOA
DYNLL2	ELOC
DYRK4	ELOVL1
E2F3	ELOVL4
E2F4	ELOVL5
EBNA1BP2	ELOVL6
EBP	ELP1
EBPL	ELP2
ECD	ELP4
ECE1	ELP5
ECI2	ELP6
ECPAS	EMC3
ECSIT	EMC4
ECT2	EMC9
EDC3	EMD
EDC4	EME1
EDRF1	EMG1
EEA1	EMP2
EEF1A2	ENAH
EEF1B2	ENO1
EEF1D	ENOX2
EEF1E1	ENPP1
EEF2	ENSA
EEF2KMT	ENTR1
EFCAB7	EOLA2
EFL1	EP400
EFNA4	EPAS1
EHBP1	EPB41
EHD4	EPB41L2
EHMT1	EPHA7
EHMT2	EPHX1
EID2	EPHX4
EIF1	EPRS1
EIF1AX	ERBIN
EIF2A	ERC1
EIF2AK1	ERCC4
EIF2B1	ERCC6
EIF2B2	ERCC6L
EIF2B3	ERGIC1
EIF2B4	ERI1
EIF2D	ERI2
EIF2S1	ERI3
EIF2S2	ERLEC1
EIF3A	ERLIN1
EIF3B	ERLIN2
EIF3C	ERMARD
EIF3D	ERMP1
EIF3F	ERP44
EIF3K	ESCO1
EIF3L	ESCO2
EIF3M	ESF1
EIF4A2	ESPL1
EIF4B	ESRRA
EIF4E	ESS2
EIF4E2	ESYT1
EIF4ENIF1	ESYT2
EIF4G1	ETAA1
EIF4G2	ETF1
EIF4H	ETFDH
EIF5	ETNK1
EIPR1	ETV3
ELAC2	EWSR1
ELF1	EXD2
ELF4	EXO1
ELMOD2	EXOC2
ELOA	EXOC5
ELOC	EXOC6
ELOVL1	EXOSC10
ELOVL4	EXOSC3
ELOVL5	EXOSC4
ELOVL6	EXOSC7
ELP1	EXOSC8
ELP2	EXOSC9
ELP4	EXPH5
ELP5	EXT2
ELP6	EXTL2
EMC3	EYA3
EMC4	EZH2
EMC7	EZR
EMC9	F12
EMD	FAF2
EME1	FAH
EMG1	FAM104A
EMP2	FAM104B
ENAH	FAM120AOS
ENO1	FAM120B
ENOX2	FAM122A
ENPP1	FAM122B
ENTR1	FAM133B
EOLA2	FAM135A
EP400	FAM136A
EPAS1	FAM160B1
EPB41	FAM161A
EPB41L2	FAM168B
EPHA7	FAM171B
EPHX1	FAM189B
EPN1	FAM199X
EPRS1	FAM200A
ERBIN	FAM217B
ERC1	FAM241B
ERCC3	FAM3C
ERCC4	FAM50A
ERCC5	FAM83B
ERCC6	FAM89A
ERCC6L	FAM98A
ERGIC1	FAN1
ERI1	FANCB
ERI2	FANCD2
ERI3	FANCG
ERLEC1	FANCI
ERLIN1	FAR1
ERLIN2	FARSB
ERMARD	FASN
ERP44	FASTK
ESCO1	FASTKD2
ESCO2	FASTKD5
ESF1	FAU
ESPL1	FBH1
ESRRA	FBL
ESS2	FBRS
ESYT1	FBXL12
ETAA1	FBXL15
ETF1	FBXL18
ETFA	FBXL20
ETNK1	FBXL5
ETV3	FBXO16
EWSR1	FBXO22
EXD2	FBXO28
EXO1	FBXO3
EXOC2	FBXO30
EXOC5	FBXO4
EXOC6	FBXO42
EXOC8	FBXO48
EXOSC10	FBXO5
EXOSC3	FBXO7
EXOSC4	FBXW11
EXOSC7	FBXW2
EXOSC8	FCHO2
EXOSC9	FDFT1
EXPH5	FDPS
EXTL2	FEM1B
EYA3	FEN1
EZH2	FERMT2
EZR	FGD1
F12	FH
F2R	FHL1
FAAP20	FIGN
FAF2	FIGNL1
FAM104A	FIS1
FAM120A	FKBP4
FAM120AOS	FKBP5
FAM120B	FLI1
FAM122B	FLII
FAM126B	FLNA
FAM133B	FLNB
FAM135A	FLOT1
FAM136A	FLYWCH2
FAM160B1	FMO4
FAM161A	FNBP4
FAM168B	FNDC3A
FAM171B	FOXK2
FAM189B	FOXM1
FAM199X	FOXN2
FAM200A	FOXO1
FAM217B	FOXO3
FAM241B	FOXRED1
FAM3C	FP565260.1
FAM50A	FPGS
FAM53B	FPGT
FAM83B	FRA10AC1
FAM89A	FRG1
FAM98A	FRMD6
FAN1	FRS2
FANCB	FRYL
FANCD2	FTO
FANCG	FTSJ3
FANCI	FUBP1
FANCM	FUBP3
FAR1	FUCA2
FARS2	FUNDC2
FARSB	FUS
FASN	FXR1
FASTK	FXR2
FASTKD1	FZD3
FASTKD2	G2E3
FASTKD5	G3BP1
FAT4	G3BP2
FAU	G6PC3
FBH1	GABARAPL2
FBL	GABPA
FBXL12	GAL
FBXL15	GALE
FBXL18	GALK2
FBXL20	GALNT1
FBXL3	GALNT7
FBXL5	GAMT
FBXO16	GANAB
FBXO22	GAPVD1
FBXO28	GARS1
FBXO3	GART
FBXO30	GATA4
FBXO4	GATAD2B
FBXO42	GATB
FBXO48	GBE1
FBXO5	GBF1
FBXO7	GCLM
FBXW11	GCN1
FBXW2	GCNT1
FCF1	GCSH
FCHO2	GDAP2
FDFT1	GDF11
FDPS	GDI1
FEN1	GDI2
FERMT2	GEMIN2
FEZ2	GEMIN4
FGD4	GEMIN5
FGD6	GET1
FH	GET3
FHL1	GFM1
FIGN	GFM2
FIGNL1	GFPT1
FIP1L1	GGA3
FIS1	GGCX
FKBP10	GGH
FKBP1A	GGNBP2
FKBP4	GGPS1
FKBP5	GHITM
FLI1	GID4
FLII	GID8
FLNA	GIGYF2
FLNB	GK5
FLOT1	GLA
FLT1	GLB1
FLYWCH2	GLCCI1
FMO4	GLE1
FNBP4	GLI3
FNDC3A	GLMN
FOXK2	GLO1
FOXM1	GLRX3
FOXN2	GLS
FOXO1	GLT8D2
FOXO3	GLTP
FOXRED1	GLUL
FP565260.1	GLYR1
FPGS	GMCL1
FPGT	GMFB
FRA10AC1	GMNN
FRG1	GMPR2
FRMD6	GMPS
FRRS1	GNAI1
FRS2	GNAI3
FRYL	GNAQ
FTO	GNB1
FTSJ1	GNB4
FTSJ3	GNG11
FUBP1	GNG12
FUBP3	GNG4
FUCA2	GNL2
FUNDC2	GNL3
FUS	GNPAT
FXR1	GNPDA1
FXR2	GNPTAB
FXYD5	GOLGA5
FYTTD1	GOLGA7
FZD7	GOLGB1
G2E3	GOLM1
G3BP1	GOLPH3
G3BP2	GOLPH3L
GABARAPL2	GOLT1B
GABPA	GON4L
GAL	GORAB
GALE	GOT1
GALK1	GOT2
GALK2	GPAM
GALNT1	GPANK1
GALNT7	GPAT4
GAMT	GPATCH1
GAN	GPATCH2L
GANAB	GPATCH8
GAPVD1	GPBP1
GARS1	GPBP1L1
GART	GPD2
GAS1	GPHN
GATA4	GPI
GATAD2B	GPN1
GATB	GPN3
GBE1	GPR155
GBF1	GPR89A
GCLM	GPR89B
GCN1	GPRASP2
GCNT1	GPRC5A
GCSH	GPS1
GDE1	GPX8
GDF11	GRAMD1A
GDI1	GRB10
GDI2	GRB2
GEMIN2	GREB1L
GEMIN4	GRINA
GEMIN5	GRIPAP1
GEMIN6	GRK2
GEMIN8	GRK6
GET1	GRPEL2
GET3	GRSF1
GFM1	GRWD1
GFM2	GSDME
GFOD1	GSK3A
GFPT1	GSKIP
GFUS	GSPT1
GGA3	GSS
GGCX	GSTK1
GGH	GSTM2
GGNBP2	GSTO1
GGPS1	GTF2A1
GHITM	GTF2A2
GID4	GTF2B
GID8	GTF2E2
GIGYF2	GTF2F2
GINM1	GTF2H1
GJA1	GTF2H2
GK5	GTF2I
GLA	GTF3C1
GLB1	GTF3C2
GLCCI1	GTF3C3
GLCE	GTF3C4
GLE1	GTPBP4
GLI3	GTPBP6
GLMN	GUCY1B1
GLMP	GUF1
GLO1	GXYLT1
GLRX3	GYG2
GLS	GZF1
GLT8D2	H1-4
GLUL	H2AC20
GLYR1	H2AZ2
GMCL1	H3-3B
GMFB	H4C3
GMNN	HACD3
GMPR2	HACL1
GMPS	HADH
GNA13	HADHA
GNAI1	HADHB
GNAI3	HAGH
GNAQ	HAUS4
GNB1	HAUS6
GNB4	HAX1
GNE	HBS1L
GNG12	HCCS
GNG4	HDAC1
GNG7	HDAC2
GNL2	HDAC3
GNL3	HDDC2
GNPAT	HDGF
GNPDA1	HDGFL2
GNPNAT1	HDHD5
GNPTAB	HDLBP
GOLGA5	HDX
GOLGA7	HEATR1
GOLM1	HEATR5B
GOLPH3	HEATR6
GOLPH3L	HEBP1
GOLT1B	HECTD1
GON4L	HELZ
GORAB	HERC1
GOT1	HERC2
GOT2	HERC4
GPALPP1	HERC5
GPAM	HERPUD1
GPANK1	HES6
GPAT4	HEY2
GPATCH1	HGH1
GPATCH2	HGS
GPATCH8	HIF1A
GPBP1	HIF1AN
GPBP1L1	HIGD2A
GPD2	HIKESHI
GPHN	HINT3
GPI	HIPK1
GPN1	HIPK2
GPN3	HIRIP3
GPR155	HJURP
GPR161	HK1
GPR63	HLA-E
GPR89A	HLCS
GPR89B	HM13
GPRASP2	HMBS
GPRC5A	HMG20A
GPRIN3	HMGB1
GPS1	HMGB3
GPX3	HMGCR
GPX8	HMGCS1
GRAMD1A	HMGN1
GRB10	HMGN4
GRB2	HMGN5
GRINA	HMGXB4
GRIPAP1	HMMR
GRK2	HNRNPA1
GRK6	HNRNPA1L2
GRPEL2	HNRNPA1P48
GRSF1	HNRNPA3
GRWD1	HNRNPAB
GSDME	HNRNPC
GSK3A	HNRNPDL
GSKIP	HNRNPF
GSPT1	HNRNPH1
GSS	HNRNPH2
GSTA4	HNRNPH3
GSTK1	HNRNPK
GSTM2	HNRNPL
GSTO1	HNRNPM
GTF2A2	HNRNPU
GTF2B	HOMER1
GTF2E2	HOXA10
GTF2F2	HOXA5
GTF2H1	HOXB7
GTF2H2	HOXD13
GTF2I	HPRT1
GTF3A	HPS5
GTF3C1	HRAS
GTF3C3	HS3ST3A1
GTF3C4	HS3ST3B1
GTF3C5	HS6ST2
GTPBP4	HSBP1
GTPBP6	HSD17B10
GTSE1	HSD17B11
GUCY1B1	HSD17B4
GUF1	HSDL1
GUSB	HSDL2
GXYLT1	HSF1
GYG1	HSF2
GYG2	HSP90AA1
GZF1	HSP90AB1
H1-0	HSP90B1
H1-4	HSPA13
H2AC20	HSPA14
H2AZ2	HSPA1B
H3-3A	HSPA4
H3-3B	HSPA4L
H4C3	HSPA5
HACD3	HSPA8
HACL1	HSPA9
HADH	HSPB1
HADHA	HSPB11
HADHB	HSPBP1
HAGH	HSPD1
HARS1	HSPH1
HAUS1	HTATIP2
HAUS4	HTATSF1
HAX1	HTRA2
HBS1L	HUWE1
HCCS	HYLS1
HDAC1	IARS1
HDAC2	IARS2
HDAC3	IBA57
HDDC2	IBTK
HDGF	ICE2
HDGFL2	ID3
HDHD5	IDE
HDLBP	IDH1
HDX	IDH3B
HEATR1	IDI1
HEATR3	IFI27L2
HEATR5B	IFIT3
HEATR6	IFIT5
HEBP1	IFNAR1
HECTD1	IFNGR1
HELLS	IFNGR2
HELZ	IFRD2
HERC2	IFT20
HERC4	IFT46
HERC5	IFT88
HERPUD1	IFTAP
HES6	IGBP1
HEXB	IGF2BP1
HEY2	IGF2BP3
HGH1	IGFBP4
HGS	IGFBP5
HIBCH	IK
HIF1A	IL1RAP
HIF1AN	ILF3
HIGD2A	ILKAP
HIKESHI	ILVBL
HIP1	IMMT
HIPK1	IMPA1
HIPK2	IMPDH2
HIRA	ING3
HIRIP3	INO80D
HJURP	INO80E
HK1	INSIG2
HLA-B	INSR
HLA-C	INTS1
HLCS	INTS10
HMBS	INTS11
HMG20A	INTS12
HMGB1	INTS13
HMGB3	INTS14
HMGCR	INTS3
HMGCS1	INTS5
HMGN1	INTS7
HMGN2	INTU
HMGN4	INVS
HMGN5	IPMK
HMGXB3	IPO11
HMGXB4	IPO13
HMMR	IPO5
HNRNPA1	IPO9
HNRNPA1P48	IPP
HNRNPA3	IQCB1
HNRNPAB	IQCC
HNRNPC	IQGAP1
HNRNPDL	IQGAP2
HNRNPF	IRAK1
HNRNPH1	IRAK4
HNRNPH2	IREB2
HNRNPH3	IRF2BP2
HNRNPK	ISCA1
HNRNPL	ISCA2
HNRNPLL	ISG20L2
HNRNPM	ISL1
HNRNPU	ISL2
HNRNPUL1	ISYNA1
HOMER2	ITCH
HOXA10	ITFG1
HOXA5	ITFG2
HOXB13	ITGAE
HOXB7	ITGB1BP1
HOXC10	ITGB3BP
HOXC13	ITM2C
HOXD13	ITPA
HPRT1	ITPR2
HPS5	ITPRID2
HRAS	ITSN2
HROB	IVNS1ABP
HS3ST3B1	JAGN1
HS6ST2	JAM2
HSBP1	JAM3
HSD17B10	JKAMP
HSD17B11	JMJD6
HSD17B4	JPT1
HSD17B7	JRKL
HSDL1	JUN
HSDL2	KANSL2
HSF1	KANSL3
HSF2	KARS1
HSP90AA1	KAT2A
HSP90AB1	KAT5
HSP90B1	KAT6A
HSPA13	KAT7
HSPA14	KAT8
HSPA1B	KATNA1
HSPA4	KBTBD2
HSPA4L	KBTBD3
HSPA5	KCTD10
HSPA8	KCTD12
HSPA9	KCTD5
HSPB1	KCTD9
HSPB11	KDM1A
HSPBP1	KDM2A
HSPD1	KDM3A
HSPH1	KDM3B
HTATIP2	KDM4A
HTATSF1	KDM5A
HTRA2	KDM5B
HUWE1	KDM5C
HYLS1	KDM6A
IARS1	KDSR
IARS2	KHDRBS1
IBA57	KHSRP
IBTK	KIAA0232
ICE1	KIAA0513
ID3	KIAA0930
IDE	KIAA1191
IDH1	KIAA1549
IDH3B	KIAA1586
IDI1	KIAA1958
IER5	KIAA2026
IFI27L2	KIDINS220
IFIT5	KIF11
IFNAR1	KIF14
IFNGR1	KIF18A
IFNGR2	KIF1B
IFRD2	KIF1C
IFT20	KIF20B
IFT88	KIF21A
IGBP1	KIF22
IGF2BP1	KIF2A
IGF2BP3	KIF2C
IGFBP4	KIF4A
IGFBP5	KIF5B
IK	KIF5C
IL17RA	KIFAP3
ILF3	KIN
ILKAP	KITLG
ILVBL	KIZ
IMMT	KLF9
IMP4	KLHDC10
IMPA2	KLHL12
IMPACT	KLHL15
IMPDH2	KLHL20
ING3	KLHL23
INO80D	KLHL28
INO80E	KLHL8
INPP5B	KLHL9
INSIG2	KLRG1
INSR	KMT2A
INTS1	KMT2B
INTS10	KMT2D
INTS11	KNL1
INTS12	KNOP1
INTS13	KNSTRN
INTS14	KNTC1
INTS3	KPNA1
INTS5	KPNA2
INTS7	KPNA3
INTU	KPNA4
INVS	KPNA5
IP6K2	KPNA6
IPMK	KPNB1
IPO11	KRCC1
IPO13	KRI1
IPO5	KRT10
IPO9	KRT18
IPP	KTN1
IQCB1	KYAT3
IQCC	L2HGDH
IQCG	L3MBTL2
IQGAP1	LAMA4
IRAK4	LAMB1
IREB2	LAMTOR1
IRF2BP2	LAMTOR2
ISCA1	LAMTOR5
ISG20L2	LANCL2
ISL1	LAP3
ISL2	LARP1
ISYNA1	LARP4
ITCH	LARP4B
ITFG1	LARP7
ITFG2	LARS1
ITGAE	LARS2
ITGB1BP1	LAS1L
ITGB3BP	LATS1
ITM2C	LBR
ITPA	LCMT1
ITPRID2	LCMT2
ITSN1	LCOR
ITSN2	LCORL
IVNS1ABP	LEMD2
JADE1	LEMD3
JAGN1	LEO1
JAM3	LETM1
JCAD	LETMD1
JHY	LGALSL
JKAMP	LGMN
JMJD6	LGR4
JOSD1	LHFPL6
JPT1	LIG3
JRK	LIG4
JRKL	LIMA1
JUN	LIMS1
KANSL2	LIN28B
KARS1	LIN52
KAT2A	LIN7C
KAT5	LIPA
KAT6A	LMAN2L
KAT7	LMBRD1
KAT8	LMNB1
KATNA1	LMNB2
KBTBD2	LNP1
KBTBD3	LNPEP
KBTBD6	LNX2
KCMF1	LONP1
KCTD10	LPGAT1
KCTD12	LPIN2
KCTD5	LPP
KCTD6	LRBA
KCTD9	LRPPRC
KDM1A	LRR1
KDM3A	LRRC28
KDM4A	LRRC40
KDM4D	LRRC41
KDM5A	LRRC47
KDM5B	LRRC49
KDM5C	LRRC57
KDM6A	LRRC59
KHDRBS1	LRRC8A
KHNYN	LRRFIP1
KHSRP	LSM10
KIAA0232	LSM12
KIAA0513	LSM14A
KIAA0930	LSM2
KIAA1191	LSM4
KIAA1549	LSM5
KIAA1586	LTA4H
KIAA1958	LTN1
KIAA2026	LUC7L
KIDINS220	LUC7L2
KIF11	LUZP1
KIF14	LY6E
KIF18A	LYPLA1
KIF1A	LYRM2
KIF1B	LYRM7
KIF1C	LYSMD3
KIF20B	LZIC
KIF21A	MACF1
KIF22	MACIR
KIF23	MACROH2A1
KIF2A	MAD2L1
KIF2C	MAD2L1BP
KIF4A	MAD2L2
KIF5B	MAEA
KIF5C	MAF1
KIFAP3	MAGED1
KIN	MAGED2
KITLG	MAML1
KIZ	MAN1A2
KLC2	MAN2B2
KLF9	MANBAL
KLHDC10	MANEA
KLHL12	MANEAL
KLHL15	MAP1A
KLHL20	MAP1B
KLHL23	MAP1LC3B
KLHL28	MAP1S
KLHL7	MAP2K2
KLHL8	MAP2K3
KLHL9	MAP3K20
KLRG1	MAP3K21
KMT2A	MAP3K3
KMT2B	MAP4
KMT2D	MAP4K4
KMT5A	MAP4K5
KNL1	MAP7
KNOP1	MAP7D1
KNSTRN	MAP7D3
KNTC1	MAPK14
KPNA1	MAPK1IP1L
KPNA2	MAPK3
KPNA3	MAPK8
KPNA4	MAPK9
KPNA5	MAPKAP1
KPNA6	MAPKAPK2
KPNB1	MAPKAPK3
KRCC1	MAPRE1
KRI1	MAPRE2
KRT10	MARCHF5
KRT18	MARCHF7
KTN1	MARCKS
KYAT3	MARCKSL1
L2HGDH	MARK2
L3MBTL2	MARK3
LAMA4	MARS1
LAMB1	MARS2
LAMTOR1	MAST3
LAMTOR2	MAST4
LAMTOR5	MASTL
LAP3	MAT2A
LAPTM4A	MAT2B
LARP1	MATR3
LARP4	MAX
LARP4B	MAZ
LARP7	MBD4
LARS1	MBIP
LARS2	MBNL1
LAS1L	MBNL2
LATS1	MBOAT2
LBR	MCFD2
LCMT1	MCL1
LCOR	MCM10
LCORL	MCM2
LEMD2	MCM3
LEMD3	MCM3AP
LEO1	MCM4
LETM1	MCM5
LETMD1	MCM6
LGALSL	MCM7
LGMN	MCMBP
LGR4	MCRS1
LHFPL6	MCTS1
LHPP	MCU
LIG1	MCUR1
LIG3	MDC1
LIG4	MDH1
LIMA1	MDH2
LIMCH1	MDM2
LIMS1	MDN1
LIN52	ME1
LIN7C	MEA1
LIPA	MEAF6
LMAN2	MEAK7
LMAN2L	MECOM
LMBR1	MECP2
LMBRD1	MED1
LMNB1	MED12
LMNB2	MED13
LNP1	MED13L
LNPEP	MED14
LNX2	MED19
LONP1	MED20
LPGAT1	MED23
LPIN2	MED27
LPP	MED28
LRBA	MED4
LRFN3	MED8
LRIG1	MEIS2
LRP10	MELK
LRPPRC	MET
LRR1	METTL1
LRRC28	METTL14
LRRC41	METTL15
LRRC47	METTL25
LRRC49	METTL2A
LRRC57	METTL3
LRRC59	METTL5
LRRC8A	METTL9
LSM10	MFAP1
LSM12	MFAP3
LSM14A	MFF
LSM2	MFN1
LSM4	MFN2
LSM5	MGA
LTA4H	MGAT4A
LTN1	MGAT5
LUC7L	MGME1
LUC7L2	MGST2
LUZP1	MGST3
LY6E	MICALL1
LYPLA1	MICU1
LYPLA2	MICU2
LYRM2	MID1
LYRM7	MID2
LYSMD2	MIEF1
LYSMD3	MIEN1
LZIC	MIER1
LZTR1	MIGA1
MACF1	MINPP1
MACIR	MIOS
MACROH2A1	MIS12
MAD2L1	MIS18BP1
MAD2L1BP	MKI67
MAD2L2	MKKS
MAEA	MKLN1
MAEL	MKNK1
MAF1	MKNK2
MAGED1	MKRN1
MAGED2	MKRN2
MAML1	MKS1
MAN1A2	MLEC
MAN2B2	MLLT1
MANBAL	MLLT11
MANEA	MLLT3
MANEAL	MLLT6
MAP1A	MLXIP
MAP1B	MMADHC
MAP1LC3B	MMGT1
MAP1S	MNAT1
MAP2K2	MOB1A
MAP2K3	MOB1B
MAP3K1	MOB4
MAP3K20	MOCS2
MAP3K21	MORC2
MAP4	MORC3
MAP4K4	MORC4
MAP4K5	MORF4L1
MAP7	MORF4L2
MAP7D1	MORN2
MAP7D2	MOSPD1
MAP7D3	MOV10
MAPK14	MOXD1
MAPK1IP1L	MPC2
MAPK3	MPG
MAPK6	MPHOSPH10
MAPK8	MPI
MAPK9	MPLKIP
MAPKAP1	MPP1
MAPKAPK5	MPP2
MAPRE1	MPP5
MAPRE2	MPRIP
MARCHF5	MPZL1
MARCHF6	MRE11
MARCHF7	MRFAP1
MARCHF8	MRPL10
MARCKS	MRPL11
MARCKSL1	MRPL14
MARK2	MRPL15
MARK3	MRPL16
MARS1	MRPL18
MARS2	MRPL19
MAST3	MRPL20
MAST4	MRPL21
MASTL	MRPL23
MAT2A	MRPL27
MAT2B	MRPL3
MATR3	MRPL32
MAX	MRPL35
MAZ	MRPL36
MB21D2	MRPL37
MBD1	MRPL4
MBD2	MRPL40
MBD3	MRPL41
MBD4	MRPL43
MBIP	MRPL44
MBNL1	MRPL45
MBNL2	MRPL47
MBOAT2	MRPL48
MCFD2	MRPL49
MCL1	MRPL50
MCM10	MRPL54
MCM2	MRPL9
MCM3	MRPS11
MCM3AP	MRPS12
MCM4	MRPS18A
MCM5	MRPS18B
MCM6	MRPS2
MCM7	MRPS21
MCMBP	MRPS22
MCRS1	MRPS26
MCTS1	MRPS27
MCU	MRPS31
MCUR1	MRPS34
MDC1	MRPS35
MDH1	MRPS5
MDH2	MRPS7
MDM2	MRRF
MDN1	MRS2
ME1	MRTFB
MEA1	MRTO4
MEAF6	MSANTD4
MEAK7	MSH2
MECOM	MSH6
MECP2	MSL1
MED1	MSL2
MED10	MSL3
MED11	MSMO1
MED13	MSN
MED14	MTA2
MED19	MTAP
MED20	MTARC1
MED22	MTCH1
MED23	MTERF1
MED24	MTERF3
MED27	MTF1
MED28	MTF2
MED4	MTFMT
MED8	MTHFD1
MEIS2	MTHFD2
MELK	MTIF2
MET	MTM1
METTL1	MTMR2
METTL14	MTMR6
METTL25	MTOR
METTL2A	MTPAP
METTL3	MTR
METTL5	MTREX
METTL9	MYBBP1A
MFAP1	MYC
MFAP3	MYCBP
MFF	MYCBP2
MFN1	MYH10
MFN2	MYH14
MGA	MYH9
MGAT4A	MYL6
MGAT5	MYL6B
MGME1	MYO10
MGST2	MYO6
MGST3	NAA15
MIA3	NAA20
MICALL1	NAA30
MICU1	NAA38
MICU2	NAA50
MID2	NABP2
MIEF1	NACA
MIER1	NACC1
MINDY3	NACC2
MINPP1	NAMPT
MIOS	NANS
MIS12	NAP1L1
MIS18BP1	NAP1L4
MKI67	NARF
MKKS	NARS1
MKLN1	NASP
MKNK1	NAT10
MKNK2	NAT9
MKRN1	NBDY
MKRN2	NBEA
MKS1	NBN
MLLT1	NBR1
MLLT11	NCAPD2
MLLT6	NCAPD3
MLST8	NCAPG
MLXIP	NCAPH
MMACHC	NCAPH2
MMADHC	NCBP1
MMGT1	NCBP2
MMUT	NCDN
MNAT1	NCKAP5L
MOB1A	NCL
MOB4	NCLN
MOCOS	NCOA3
MOCS2	NCOA4
MON1B	NCOA6
MORC2	NCOR1
MORC3	NCSTN
MORC4	NDC1
MORF4L1	NDC80
MORF4L2	NDFIP2
[truncated: 2,244 more rows]
