# Supplementary material for: Systematic characterization of the composition and dynamics of processing body-associated mRNAs
Source: Research Square preprint supplement (doi:10.21203/rs.3.rs-5354706/v1), 2024-12-04
Supplement: Supplementary file 13 [file Supplementary Table 6.xlsx]

## Sheet: Sheet 1
Supplementary Table 6: Gene ontology analysis of common PB-associated mRNAs
ONTOLOGY	ID	Description	GeneRatio	BgRatio	pvalue	p.adjust	qvalue	geneID	Count
BP	GO:0002181	cytoplasmic translation	48/1199	161/18903	3.38475e-20	1.85044e-16	1.51779e-16	CNBP/CPEB4/CSDE1/DENR/DHX9/EIF2S3/EIF3A/EIF3J/EIF3L/EIF4A2/EIF4B/EIF4H/FMR1/HNRNPU/NCBP2/PABPC1/PKM/RPL11/RPL15/RPL22/RPL27/RPL31/RPL36/RPL37/RPL37A/RPL38/RPL5/RPL7/RPL7A/RPL8/RPL9/RPLP1/RPLP2/RPS12/RPS15A/RPS16/RPS20/RPS23/RPS24/RPS25/RPS27A/RPS7/RPSA/RWDD1/SLBP/SYNCRIP/YBX1/ZC3H15	48
BP	GO:1903311	regulation of mRNA metabolic process	63/1199	309/18903	8.36799e-17	2.28739e-13	1.87619e-13	AGO2/AHCYL1/AKT1/CASC3/CDC73/CNOT1/CNOT6/CNOT7/CSDE1/DCP2/DDX17/DDX5/DHX9/FMR1/HNRNPA0/HNRNPA1/HNRNPA2B1/HNRNPAB/HNRNPC/HNRNPK/HNRNPU/HSPA8/IGF2BP3/KHDRBS1/MBNL1/NCBP2/NPM1/NUDT21/PABPC1/PAPOLA/PATL1/PDE12/PRDX6/PTBP1/PUM2/QKI/RAVER2/RBFOX2/RBM8A/RBMX/RC3H2/ROCK1/ROCK2/SAMD4B/SERBP1/SF3B4/SON/SRSF10/SRSF2/SRSF7/SRSF9/SYNCRIP/TAF15/TARDBP/TENT4B/THRAP3/TRA2B/U2AF2/VIRMA/YBX1/YTHDF3/ZC3H14/ZC3HAV1	63
BP	GO:0043161	proteasome-mediated ubiquitin-dependent protein catabolic process	73/1199	450/18903	9.48811e-14	1.72905e-10	1.41822e-10	AKT1/AMFR/ANKIB1/APC/APPBP2/ARMC8/BIRC2/CALR/CANX/CCDC47/CD2AP/CDC27/CLOCK/CTNNB1/CUL4B/CUL5/DNAJB14/DNAJC10/EDEM3/ERLEC1/ERLIN2/FAM8A1/FBXW11/FEM1B/GSK3B/HSP90AB1/HSP90B1/ITCH/KLHL15/KLHL42/MAN1A1/MAPK9/MARCHF6/MDM2/OS9/PCNP/PPP2CB/PPP2R5C/PSMB5/PSMD1/PSMD10/RAD23B/RMND5A/RNF14/RPL11/RYBP/SEL1L/SKP1/SMARCC1/SMURF2/SOCS4/SPOPL/STT3B/SUMO1/SUMO2/TBL1XR1/TRIM2/TRIP12/UBE2A/UBE2H/UBE2J1/UBE2K/UBQLN1…	73
BP	GO:0050684	regulation of mRNA processing	35/1199	139/18903	1.09425e-12	1.49557e-09	1.22671e-09	AHCYL1/CDC73/DDX17/DDX5/DHX9/FMR1/HNRNPA1/HNRNPA2B1/HNRNPK/HNRNPU/HSPA8/KHDRBS1/MBNL1/NCBP2/NPM1/NUDT21/PAPOLA/PRDX6/PTBP1/QKI/RAVER2/RBFOX2/RBM8A/RBMX/SF3B4/SON/SRSF10/SRSF2/SRSF7/SRSF9/THRAP3/TRA2B/U2AF2/VIRMA/ZC3H14	35
BP	GO:0043484	regulation of RNA splicing	40/1199	180/18903	2.11594e-12	2.00112e-09	1.64138e-09	ATXN7/DDX17/DDX5/FMR1/GRSF1/HNRNPA1/HNRNPA2B1/HNRNPF/HNRNPH1/HNRNPH2/HNRNPH3/HNRNPK/HNRNPU/HSPA8/KHDRBS1/MBNL1/NPM1/POLR2A/PRDX6/PTBP1/PTBP3/QKI/RAVER2/RBFOX2/RBM12/RBM12B/RBM8A/RBMX/SF3B4/SLC38A2/SON/SRSF1/SRSF10/SRSF2/SRSF7/SRSF9/THRAP3/TMBIM6/TRA2B/U2AF2	40
BP	GO:0032386	regulation of intracellular transport	58/1199	336/18903	2.56225e-12	2.00112e-09	1.64138e-09	ARFIP1/BNIP3L/CD81/CDK1/CHMP3/CHP1/CTDSPL2/DHX9/ECT2/ERLEC1/GSK3B/HSP90AA1/HSP90AB1/INSIG1/KHDRBS1/LAMP1/LMAN1/MAP1B/MAP2K1/MAPK1/MSN/MTMR2/NCBP2/NOLC1/NPEPPS/NUP58/NUS1/OAZ1/OAZ2/OS9/PPM1A/PPP1R12A/PRKAA1/PRKACA/PRNP/PTPN1/PTPN11/RAB21/RAN/RDX/REEP5/SAR1A/SAR1B/SCP2/SH3GLB1/SNX3/SREBF2/SUMO1/TARDBP/THOC2/TMEM30A/UBE2J1/UHMK1/VPS35/XPO1/XPO4/YIPF5/YOD1	58
BP	GO:0008380	RNA splicing	72/1199	469/18903	2.23473e-12	2.00112e-09	1.64138e-09	AQR/ATXN7/C2orf49/CASC3/DDX17/DDX5/DHX15/DHX9/FAM98A/FAM98B/FMR1/GRSF1/HNRNPA1/HNRNPA2B1/HNRNPA3/HNRNPC/HNRNPF/HNRNPH1/HNRNPH2/HNRNPH3/HNRNPK/HNRNPR/HNRNPU/HSPA8/KHDRBS1/MBNL1/MTREX/NCBP2/NPM1/PABPC1/POLR2A/PPP2CA/PPP4R2/PRDX6/PRPF40A/PSIP1/PTBP1/PTBP3/QKI/RAVER2/RBFOX2/RBM12/RBM12B/RBM8A/RBMX/SCAF11/SF3B1/SF3B4/SLC38A2/SLU7/SNU13/SON/SREK1IP1/SRSF1/SRSF10/SRSF11/SRSF2/SRSF7/SRSF9/SYNCRIP/TAF15/T…	72
BP	GO:0006913	nucleocytoplasmic transport	57/1199	329/18903	3.39882e-12	2.0646e-09	1.69345e-09	ABCE1/AGFG1/AHCYL1/AKT1/ANP32A/APPL1/ATF2/CALR/CASC3/CDK1/CHP1/CSE1L/CTDSPL2/DHX9/E2F3/ECT2/FYTTD1/GSK3B/HNRNPA1/HNRNPA2B1/HSP90AA1/HSP90AB1/HSPA9/IPO7/KHDRBS1/KPNA3/MED1/NCBP2/NMD3/NOLC1/NPM1/NUP50/NUP58/NUTF2/PPM1A/PPP1R12A/PPP3CA/PPP3R1/PRKACA/PTPN11/PTTG1IP/RAN/RANBP2/RBM8A/SEH1L/SMG1/SSB/SUMO1/TARDBP/THOC2/TNPO1/UBE2I/UHMK1/WASHC4/XPO1/XPO4/XPO7	57
BP	GO:0051169	nuclear transport	57/1199	329/18903	3.39882e-12	2.0646e-09	1.69345e-09	ABCE1/AGFG1/AHCYL1/AKT1/ANP32A/APPL1/ATF2/CALR/CASC3/CDK1/CHP1/CSE1L/CTDSPL2/DHX9/E2F3/ECT2/FYTTD1/GSK3B/HNRNPA1/HNRNPA2B1/HSP90AA1/HSP90AB1/HSPA9/IPO7/KHDRBS1/KPNA3/MED1/NCBP2/NMD3/NOLC1/NPM1/NUP50/NUP58/NUTF2/PPM1A/PPP1R12A/PPP3CA/PPP3R1/PRKACA/PTPN11/PTTG1IP/RAN/RANBP2/RBM8A/SEH1L/SMG1/SSB/SUMO1/TARDBP/THOC2/TNPO1/UBE2I/UHMK1/WASHC4/XPO1/XPO4/XPO7	57
BP	GO:0016032	viral process	66/1199	421/18903	7.29148e-12	3.98625e-09	3.26965e-09	ADAR/ARL8B/BSG/CALCOCO2/CANX/CCNT1/CD46/CD81/CDK1/CFL1/CHMP2B/CHMP3/CNOT7/CSDE1/CTSB/DAG1/DDX3X/DEK/DENR/DHX9/EIF3A/EIF3L/EPS15/FMR1/GALNT1/GSK3B/HACD3/HDAC1/HMGB1/HSP90AB1/HSPA8/IDE/ITCH/ITGB1/KPNA3/LAMP1/MAN2A1/MGAT5/NUCKS1/PABPC1/PDCD6IP/PDE12/PIKFYVE/PKN2/PTBP1/RAB1A/RAN/RPSA/RSF1/SCARB2/SNX3/SP1/SPCS3/SSB/STAT1/STAU1/TARDBP/TFRC/TMEM41B/TOP2A/TOP2B/UBP1/VTA1/XPR1/ZC3HAV1/ZDHHC9	66
BP	GO:0006417	regulation of translation	72/1199	486/18903	1.25609e-11	6.24277e-09	5.12052e-09	ABCE1/AGO1/AGO2/AKT1/APP/BZW1/CALR/CAPRIN1/CASC3/CNBP/CNOT1/CNOT6/CNOT7/CPEB4/CSDE1/DCP2/DDX3X/DHX9/DNAJC3/EIF2AK1/EIF2S1/EIF2S3/EIF4A2/EIF4B/EIF4EBP2/EIF4G2/EIF4H/EIF5A/EIF5B/EPRS1/FMR1/GSPT1/HNRNPU/IGF2BP3/IREB2/KHDRBS1/LARP4/LSM14A/MSI2/MTPN/NCBP2/NOLC1/NPM1/PABPC1/PATL1/PDE12/PKM/PPP1R15B/PRKDC/PUM2/PURA/QKI/RBM8A/RC3H2/RHOA/ROCK1/ROCK2/RPL22/RPL38/RPL5/RPS6KA3/RPS6KB1/SAMD4B/SECISBP2L/SERP1/…	72
BP	GO:0034976	response to endoplasmic reticulum stress	48/1199	261/18903	2.03224e-11	9.25856e-09	7.59417e-09	AMFR/ATP2A2/CALR/CANX/CCDC47/CCND1/DDX3X/DNAJB14/DNAJC10/DNAJC3/EDEM3/EIF2S1/ERLEC1/ERLIN2/ERMP1/ERO1A/FAM8A1/GSK3B/HSP90B1/MAN1A1/MARCHF6/MBTPS1/MBTPS2/OPA1/OS9/PDIA3/PDIA6/PPP1R15B/PPP2CB/PTPN1/SEL1L/SERINC3/SERP1/STT3B/TMBIM6/TMCO1/TMED2/TMEM33/TMTC3/TMX1/TNFRSF10B/UBE2J1/UBQLN1/UBQLN2/UBXN4/UGGT1/XBP1/YOD1	48
BP	GO:0048193	Golgi vesicle transport	52/1199	298/18903	2.3134e-11	9.72873e-09	7.97982e-09	ACSL3/AP3S1/ARCN1/ARF3/ARF4/ARFGEF2/ARL1/ATP2C1/CNIH4/COPA/COPB2/EPS15/EXOC4/EXOC5/EXOC8/GABARAPL2/GOLPH3/GOPC/INSIG1/KDELR1/LAMP1/LMAN1/LMAN2/LYPLA1/PITPNB/PPP6C/PREPL/RAB10/RAB14/RAB1A/RAB6A/RABEP1/SAR1A/SAR1B/SCAMP1/SEC22B/SEC23A/SEC23IP/SEC24A/SNAP23/SNX1/SNX3/SORT1/TMED10/TMED2/TMED4/TMED5/TMED7/USO1/VAMP3/YIPF5/YIPF6	52
BP	GO:0035966	response to topologically incorrect protein	36/1199	163/18903	3.22223e-11	1.25828e-08	1.03208e-08	ABCB10/AMFR/CCND1/DNAJA1/DNAJB14/DNAJC10/DNAJC3/EDEM3/EIF2S1/ERLEC1/ERMP1/ERO1A/HSP90AA1/HSP90AB1/HSPA13/HSPA4L/HSPA8/HSPA9/HSPH1/KLHL15/MBTPS1/MBTPS2/OS9/PPP1R15B/PTPN1/SERP1/STT3B/TM7SF3/TMBIM6/TMED2/TMEM33/TRAM1/UBXN4/UGGT1/XBP1/YOD1	36
BP	GO:0006986	response to unfolded protein	33/1199	141/18903	4.10439e-11	1.49591e-08	1.227e-08	ABCB10/AMFR/CCND1/DNAJA1/DNAJC10/DNAJC3/EDEM3/EIF2S1/ERLEC1/ERMP1/ERO1A/HSP90AA1/HSP90AB1/HSPA13/HSPA4L/HSPA8/HSPA9/HSPH1/MBTPS1/MBTPS2/OS9/PPP1R15B/PTPN1/SERP1/STT3B/TM7SF3/TMBIM6/TMED2/TMEM33/TRAM1/UBXN4/XBP1/YOD1	33
BP	GO:0006413	translational initiation	30/1199	123/18903	1.05576e-10	3.60741e-08	2.95892e-08	ABCE1/AGO2/BZW1/CSDE1/DDX3X/DENR/DNAJC3/EIF1AX/EIF2AK1/EIF2S1/EIF2S3/EIF3A/EIF3J/EIF3L/EIF4A2/EIF4B/EIF4EBP2/EIF4G2/EIF4H/EIF5B/FMR1/KHDRBS1/NCBP2/NPM1/PPP1R15B/RPS6KB1/SLBP/TMED2/UHMK1/YTHDF3	30
BP	GO:0016050	vesicle organization	56/1199	353/18903	1.82597e-10	5.87212e-08	4.8165e-08	AGFG1/AP1S1/AP3M1/AP3S1/ARFGEF2/ARL8B/ATP6AP1/ATP6AP2/ATP6V1A/ATP6V1D/BLOC1S6/CD2AP/CHMP2B/CHMP3/CREB1/EPS15/EXOC8/F2R/FNBP1L/GNAI3/GOLPH3/HOOK1/INSIG1/LAPTM4B/PAFAH1B1/PDCD6IP/PI4K2B/PICALM/PIKFYVE/PPP6C/RAB11A/RAB14/RAB1A/RAB5B/SAR1A/SAR1B/SCARB2/SEC22B/SEC23A/SEC24A/SNAP23/SNX10/SNX3/SORT1/STX12/TMED10/TMED2/TMF1/USO1/VAMP3/VPS36/VPS41/VTA1/WASHC4/YIPF5/ZFYVE16	56
BP	GO:1903312	negative regulation of mRNA metabolic process	25/1199	94/18903	5.28348e-10	1.60471e-07	1.31624e-07	CSDE1/DHX9/FMR1/HNRNPA0/HNRNPA2B1/HNRNPAB/HNRNPC/HNRNPK/HNRNPU/IGF2BP3/NPM1/PABPC1/PTBP1/RBMX/SRSF10/SRSF7/SRSF9/SYNCRIP/TAF15/TARDBP/TENT4B/THRAP3/U2AF2/YBX1/ZC3H14	25
BP	GO:0048024	regulation of mRNA splicing, via spliceosome	27/1199	109/18903	6.19983e-10	1.78392e-07	1.46323e-07	DDX17/DDX5/FMR1/HNRNPA1/HNRNPA2B1/HNRNPK/HNRNPU/HSPA8/KHDRBS1/MBNL1/NPM1/PRDX6/PTBP1/QKI/RAVER2/RBFOX2/RBM8A/RBMX/SF3B4/SON/SRSF10/SRSF2/SRSF7/SRSF9/THRAP3/TRA2B/U2AF2	27
BP	GO:0051168	nuclear export	34/1199	165/18903	8.04046e-10	2.19786e-07	1.80276e-07	ABCE1/AGFG1/AHCYL1/CALR/CASC3/CHP1/CSE1L/CTDSPL2/DHX9/FYTTD1/GSK3B/HNRNPA1/HNRNPA2B1/HSPA9/KHDRBS1/NCBP2/NMD3/NPM1/NUTF2/PPM1A/PRKACA/PTPN11/RAN/RANBP2/RBM8A/SMG1/SSB/THOC2/UBE2I/UHMK1/WASHC4/XPO1/XPO4/XPO7	34
BP	GO:0006403	RNA localization	38/1199	202/18903	1.29204e-09	3.36361e-07	2.75895e-07	AGFG1/CASC3/CCT6A/CCT8/CETN2/DCP2/DHX9/FMR1/FUBP3/FYTTD1/G3BP2/HNRNPA1/HNRNPA2B1/HNRNPAB/HNRNPU/IGF2BP3/KHDRBS1/NCBP2/NPM1/NUP50/NUP58/NUTF2/QKI/RAN/RANBP2/RBM8A/SEH1L/SLBP/SMG1/SRSF1/SRSF7/SSB/STAU1/THOC2/TNKS/TOMM20/XPO1/YBX1	38
BP	GO:0006984	ER-nucleus signaling pathway	17/1199	47/18903	1.73186e-09	4.30368e-07	3.53002e-07	AMFR/ATP2A2/CCDC47/EIF2S1/ERLIN2/GSK3B/INSIG1/MBTPS1/MBTPS2/PPP1R15B/PTPN1/SPRING1/SREBF2/TMCO1/TMED2/TMEM33/XBP1	17
BP	GO:1903313	positive regulation of mRNA metabolic process	30/1199	140/18903	2.99003e-09	7.10716e-07	5.82953e-07	AGO2/CDC73/CNOT1/CNOT6/CNOT7/CSDE1/DCP2/DHX9/HNRNPU/HSPA8/NCBP2/NUDT21/PABPC1/PATL1/PDE12/PRDX6/RBMX/RC3H2/ROCK1/ROCK2/SAMD4B/SF3B4/SYNCRIP/TARDBP/TENT4B/THRAP3/TRA2B/YBX1/YTHDF3/ZC3HAV1	30
BP	GO:0006446	regulation of translational initiation	22/1199	82/18903	4.78172e-09	1.08924e-06	8.93426e-07	AGO2/BZW1/CSDE1/DDX3X/DNAJC3/EIF2AK1/EIF2S1/EIF4A2/EIF4B/EIF4EBP2/EIF4G2/EIF4H/EIF5B/FMR1/KHDRBS1/NCBP2/NPM1/PPP1R15B/RPS6KB1/TMED2/UHMK1/YTHDF3	22
BP	GO:0034504	protein localization to nucleus	48/1199	306/18903	5.32448e-09	1.16436e-06	9.55044e-07	AKT1/APPL1/ARL2BP/ATF2/CALR/CCT6A/CCT8/CD2AP/CDK1/CHP1/CSE1L/CTNNA1/E2F3/ECT2/GLUL/GSK3B/HNRNPU/HSP90AA1/HSP90AB1/IPO7/KPNA3/LMNB2/MDM2/MED1/NMD3/NOLC1/NPM1/NUP50/NUP58/NUTF2/OSBPL8/PIKFYVE/PPP3CA/PPP3R1/PTTG1IP/RAN/RANBP2/RPL11/SKP1/SUMO1/SUN1/TARDBP/TFRC/TNPO1/TOR1AIP1/TOR1AIP2/XPO1/YAP1	48
BP	GO:0006457	protein folding	39/1199	223/18903	6.81382e-09	1.43274e-06	1.17518e-06	ANP32E/B2M/CALR/CANX/CCDC47/CCT6A/CCT8/CHORDC1/CSNK2A1/DNAJA1/DNAJB14/DNAJC10/DNAJC3/ERO1A/ERO1B/FKBP1A/FKBP4/FKBP5/FKBP9/GRPEL2/HSP90AA1/HSP90AB1/HSP90B1/HSPA13/HSPA4L/HSPA8/HSPA9/HSPH1/LMAN1/PDIA3/PDIA6/PTGES3/RANBP2/SACS/SELENOF/ST13/TBCEL/UGGT1/VBP1	39
BP	GO:0042176	regulation of protein catabolic process	53/1199	361/18903	9.09745e-09	1.84206e-06	1.51092e-06	ADAM9/AKT1/ANKIB1/APC/AZIN1/CD81/CSNK2A1/CUL4B/FMR1/GABARAPL2/GSK3B/HMGCR/HSP90AA1/HSP90AB1/IDE/ITCH/LAPTM4B/MAPK9/MARCHF7/MDM2/MSN/NDFIP1/OAZ1/OAZ2/ODC1/PRKACA/PSMD1/PSMD10/RAD23B/RDX/RNF14/ROCK1/RPL11/RYBP/SEC22B/SMARCC1/SNX1/SNX3/SOCS4/SUMO1/SUMO2/TMF1/TMTC3/UBE2K/UBQLN1/UBQLN2/UBR3/UCHL5/VGLL4/VPS35/WAC/XPO1/ZYG11B	53
BP	GO:0061013	regulation of mRNA catabolic process	35/1199	190/18903	1.01566e-08	1.98308e-06	1.62658e-06	AGO2/AKT1/CASC3/CNOT1/CNOT6/CNOT7/CSDE1/DCP2/DHX9/FMR1/HNRNPA0/HNRNPAB/HNRNPC/HNRNPU/IGF2BP3/NPM1/PABPC1/PATL1/PDE12/PUM2/RBM8A/RC3H2/ROCK1/ROCK2/SAMD4B/SERBP1/SYNCRIP/TAF15/TARDBP/TENT4B/THRAP3/YBX1/YTHDF3/ZC3H14/ZC3HAV1	35
BP	GO:0006402	mRNA catabolic process	41/1199	248/18903	1.51208e-08	2.85054e-06	2.3381e-06	AGO1/AGO2/AKT1/CASC3/CNOT1/CNOT6/CNOT7/CSDE1/DCP2/DDX5/DHX9/FMR1/GSPT1/HNRNPA0/HNRNPAB/HNRNPC/HNRNPU/IGF2BP3/NCBP2/NPM1/PABPC1/PATL1/PDE12/PUM2/RBM8A/RC3H2/ROCK1/ROCK2/SAMD4B/SERBP1/SMG1/SSB/SYNCRIP/TAF15/TARDBP/TENT4B/THRAP3/YBX1/YTHDF3/ZC3H14/ZC3HAV1	41
BP	GO:0035967	cellular response to topologically incorrect protein	26/1199	120/18903	2.62393e-08	4.78168e-06	3.92209e-06	ABCB10/AMFR/CCND1/DNAJB14/DNAJC10/EIF2S1/ERLEC1/ERMP1/ERO1A/HSPA13/HSPA8/HSPA9/KLHL15/MBTPS1/MBTPS2/OS9/PPP1R15B/PTPN1/SERP1/TM7SF3/TMBIM6/TMED2/TMEM33/UGGT1/XBP1/YOD1	26
BP	GO:0050657	nucleic acid transport	31/1199	163/18903	3.24612e-08	5.54579e-06	4.54883e-06	AGFG1/CASC3/CETN2/DHX9/FMR1/FYTTD1/G3BP2/HNRNPA1/HNRNPA2B1/IGF2BP3/KHDRBS1/NCBP2/NPM1/NUP50/NUP58/NUTF2/QKI/RAN/RANBP2/RBM8A/SEH1L/SLBP/SMG1/SRSF1/SRSF7/SSB/THOC2/TNKS/TOMM20/XPO1/YBX1	31
BP	GO:0050658	RNA transport	31/1199	163/18903	3.24612e-08	5.54579e-06	4.54883e-06	AGFG1/CASC3/CETN2/DHX9/FMR1/FYTTD1/G3BP2/HNRNPA1/HNRNPA2B1/IGF2BP3/KHDRBS1/NCBP2/NPM1/NUP50/NUP58/NUTF2/QKI/RAN/RANBP2/RBM8A/SEH1L/SLBP/SMG1/SRSF1/SRSF7/SSB/THOC2/TNKS/TOMM20/XPO1/YBX1	31
BP	GO:0072594	establishment of protein localization to organelle	60/1199	449/18903	3.4076e-08	5.64525e-06	4.63042e-06	AKT1/AP3M1/APPL1/ATF2/BNIP3L/CCT6A/CCT8/CDK1/CHP1/CSE1L/DNAJA1/E2F3/ECT2/GNPTAB/GRPEL2/HSP90AA1/HSP90AB1/HSPA8/IPO7/KPNA3/LAMP1/LAMP2/LMAN1/MACROH2A1/MAN1A1/MED1/NCOA4/NOLC1/NPEPPS/NUP50/NUP58/NUTF2/PEX13/PPP3CA/PPP3R1/PRKAA1/PTTG1IP/RAB10/RAB11A/RAB3GAP1/RAN/RANBP2/SCARB2/SEC62/SH3GLB1/SORT1/SPCS3/SREBF2/SRP14/SRP72/SUMO1/TARDBP/TIMM17A/TNPO1/TOMM20/TOMM34/TRAM1/VPS36/VPS41/ZFYVE16	60
BP	GO:0034975	protein folding in endoplasmic reticulum	8/1199	11/18903	3.55796e-08	5.721e-06	4.69255e-06	CALR/CANX/DNAJC10/DNAJC3/ERO1A/ERO1B/HSP90B1/PDIA3	8
BP	GO:0031331	positive regulation of cellular catabolic process	58/1199	429/18903	3.81298e-08	5.95588e-06	4.88521e-06	ADAM9/AGO2/AKT1/ANKIB1/APP/BNIP3L/CALCOCO2/CCNY/CNOT1/CNOT6/CNOT7/CSDE1/DCP2/DHX9/GNAI3/GRSF1/GSK3B/HIF1A/HMGB1/HNRNPU/ITCH/MAPK9/MDM2/MTDH/PABPC1/PAFAH1B2/PATL1/PDE12/PIK3C2A/PRKAA1/PSMD10/PTPN1/RAB3GAP1/RB1CC1/RC3H2/RNF14/ROCK1/ROCK2/SAMD4B/SCOC/SH3GLB1/SLC25A5/SOCS4/SPTLC1/SUMO1/SUMO2/SYNCRIP/TARDBP/TENT4B/TMEM59/TP53INP1/UBQLN1/UBQLN2/WAC/YBX1/YTHDF3/ZC3HAV1/ZYG11B	58
BP	GO:0034063	stress granule assembly	12/1199	28/18903	4.72119e-08	7.16965e-06	5.88078e-06	CSDE1/DAZAP2/DDX3X/EIF2S1/G3BP1/G3BP2/LSM14A/PRKAA1/PUM2/RPS23/UBAP2L/YTHDF3	12
BP	GO:0034620	cellular response to unfolded protein	23/1199	100/18903	5.12455e-08	7.37261e-06	6.04725e-06	ABCB10/AMFR/CCND1/DNAJC10/EIF2S1/ERLEC1/ERMP1/ERO1A/HSPA13/HSPA8/HSPA9/MBTPS1/MBTPS2/OS9/PPP1R15B/PTPN1/SERP1/TM7SF3/TMBIM6/TMED2/TMEM33/XBP1/YOD1	23
BP	GO:0051236	establishment of RNA localization	31/1199	166/18903	5.03852e-08	7.37261e-06	6.04725e-06	AGFG1/CASC3/CETN2/DHX9/FMR1/FYTTD1/G3BP2/HNRNPA1/HNRNPA2B1/IGF2BP3/KHDRBS1/NCBP2/NPM1/NUP50/NUP58/NUTF2/QKI/RAN/RANBP2/RBM8A/SEH1L/SLBP/SMG1/SRSF1/SRSF7/SSB/THOC2/TNKS/TOMM20/XPO1/YBX1	31
BP	GO:0006401	RNA catabolic process	45/1199	299/18903	5.67909e-08	7.57258e-06	6.21127e-06	AGO1/AGO2/AKT1/CASC3/CNOT1/CNOT6/CNOT7/CSDE1/DCP2/DDX5/DHX9/DICER1/FMR1/GRSF1/GSPT1/HNRNPA0/HNRNPAB/HNRNPC/HNRNPU/IGF2BP3/MTREX/NCBP2/NPM1/PABPC1/PATL1/PDE12/PUM2/RBM8A/RC3H2/ROCK1/ROCK2/SAMD4B/SERBP1/SMG1/SSB/SYNCRIP/TAF15/TARDBP/TENT4B/THRAP3/WDR82/YBX1/YTHDF3/ZC3H14/ZC3HAV1	45
BP	GO:0000377	RNA splicing, via transesterification reactions with bulged adenosine as nucleophile	48/1199	329/18903	5.54182e-08	7.57258e-06	6.21127e-06	AQR/CASC3/DDX17/DDX5/DHX9/FMR1/HNRNPA1/HNRNPA2B1/HNRNPA3/HNRNPC/HNRNPF/HNRNPH1/HNRNPH3/HNRNPK/HNRNPR/HNRNPU/HSPA8/KHDRBS1/MBNL1/MTREX/NCBP2/NPM1/PABPC1/PRDX6/PRPF40A/PSIP1/PTBP1/QKI/RAVER2/RBFOX2/RBM8A/RBMX/SCAF11/SF3B1/SF3B4/SLU7/SNU13/SON/SRSF1/SRSF10/SRSF2/SRSF7/SRSF9/SYNCRIP/TGS1/THRAP3/TRA2B/U2AF2	48
BP	GO:0000398	mRNA splicing, via spliceosome	48/1199	329/18903	5.54182e-08	7.57258e-06	6.21127e-06	AQR/CASC3/DDX17/DDX5/DHX9/FMR1/HNRNPA1/HNRNPA2B1/HNRNPA3/HNRNPC/HNRNPF/HNRNPH1/HNRNPH3/HNRNPK/HNRNPR/HNRNPU/HSPA8/KHDRBS1/MBNL1/MTREX/NCBP2/NPM1/PABPC1/PRDX6/PRPF40A/PSIP1/PTBP1/QKI/RAVER2/RBFOX2/RBM8A/RBMX/SCAF11/SF3B1/SF3B4/SLU7/SNU13/SON/SRSF1/SRSF10/SRSF2/SRSF7/SRSF9/SYNCRIP/TGS1/THRAP3/TRA2B/U2AF2	48
BP	GO:0000956	nuclear-transcribed mRNA catabolic process	26/1199	125/18903	6.3315e-08	8.2415e-06	6.75995e-06	AGO1/AGO2/CASC3/CNOT1/CNOT6/CNOT7/CSDE1/DCP2/DDX5/DHX9/GSPT1/HNRNPAB/HNRNPU/NCBP2/PABPC1/PATL1/PDE12/RBM8A/RC3H2/SAMD4B/SMG1/SSB/SYNCRIP/TENT4B/THRAP3/YBX1	26
BP	GO:0032984	protein-containing complex disassembly	39/1199	242/18903	6.85892e-08	8.7204e-06	7.15276e-06	ABCE1/ADD3/APC/ASPH/ATP2A2/ATXN7/CALCOCO2/CALM1/CAMSAP2/CAPZA1/CAPZA2/CCSAP/CFL1/CFL2/CHMP2B/CHMP3/CLASP1/CLASP2/DSTN/EIF5A/GSK3B/GSPT1/HSPA8/KIF5B/LAMP2/LIMA1/MAP1B/MAP1LC3B/MTPN/RDX/SET/SMARCC1/STMN1/TAOK1/TMOD3/TWF1/UBQLN1/VTA1/ZMPSTE24	39
BP	GO:0051656	establishment of organelle localization	58/1199	437/18903	7.33319e-08	9.11149e-06	7.47354e-06	ABCE1/AP3M1/AP3S1/BLOC1S6/CBL/CCDC186/CDC42/CFL1/CHMP2B/CHMP3/CLASP1/CLASP2/CTNNB1/EXOC4/EXOC5/EXOC8/FAM91A1/FBXW11/FNBP1L/HIF1A/HNRNPU/HSBP1/ITGB1/KIF3A/KIF5B/LAMP1/LMNB2/LYN/MAP1B/MAP4/MAPRE1/MYO6/NMD3/NPM1/OPA1/PAFAH1B1/PDCD6IP/PICALM/PPP6C/RAB11A/RAB1A/RAB6A/RAN/RHOT1/SAR1A/SAR1B/SEH1L/SNAP23/STARD3NL/SUN1/SYNE2/TBC1D23/TMED10/TMED2/TMEM230/WASF1/XPO1/YWHAZ	58
BP	GO:0030433	ubiquitin-dependent ERAD pathway	21/1199	87/18903	7.97665e-08	9.61433e-06	7.88599e-06	AMFR/CALR/CANX/CCDC47/DNAJB14/DNAJC10/EDEM3/ERLEC1/ERLIN2/FAM8A1/HSP90B1/MAN1A1/MARCHF6/OS9/SEL1L/STT3B/UBE2J1/UBQLN1/UBQLN2/UBXN4/YOD1	21
BP	GO:0000375	RNA splicing, via transesterification reactions	48/1199	333/18903	8.08962e-08	9.61433e-06	7.88599e-06	AQR/CASC3/DDX17/DDX5/DHX9/FMR1/HNRNPA1/HNRNPA2B1/HNRNPA3/HNRNPC/HNRNPF/HNRNPH1/HNRNPH3/HNRNPK/HNRNPR/HNRNPU/HSPA8/KHDRBS1/MBNL1/MTREX/NCBP2/NPM1/PABPC1/PRDX6/PRPF40A/PSIP1/PTBP1/QKI/RAVER2/RBFOX2/RBM8A/RBMX/SCAF11/SF3B1/SF3B4/SLU7/SNU13/SON/SRSF1/SRSF10/SRSF2/SRSF7/SRSF9/SYNCRIP/TGS1/THRAP3/TRA2B/U2AF2	48
BP	GO:0033157	regulation of intracellular protein transport	37/1199	225/18903	8.70071e-08	1.01206e-05	8.30124e-06	BNIP3L/CD81/CDK1/CHP1/CTDSPL2/ECT2/ERLEC1/GSK3B/HSP90AA1/HSP90AB1/INSIG1/LMAN1/NOLC1/NPEPPS/NUP58/OAZ1/OAZ2/OS9/PPM1A/PRKAA1/PRKACA/PRNP/PTPN1/PTPN11/RAN/SAR1A/SAR1B/SH3GLB1/SREBF2/SUMO1/TARDBP/TMEM30A/UBE2J1/UHMK1/XPO1/XPO4/YOD1	37
BP	GO:0016482	cytosolic transport	31/1199	171/18903	1.02031e-07	1.16209e-05	9.53187e-06	ACTR2/ARFIP1/ARL1/ARL8B/CHMP3/CLTC/EPS15/HOOK1/KIF5B/LAMP1/MAP2K1/MAPK1/MSN/MTMR2/PIKFYVE/PREPL/RAB14/RAB21/RAB6A/RDX/RHOBTB3/SNX1/SNX3/SNX6/SORT1/SPAG9/SRSF10/TBC1D23/VAMP3/VPS26A/VPS35	31
BP	GO:0000380	alternative mRNA splicing, via spliceosome	20/1199	81/18903	1.08138e-07	1.18238e-05	9.6983e-06	DDX17/DDX5/DHX9/FMR1/HNRNPA1/HNRNPU/KHDRBS1/MBNL1/NCBP2/PTBP1/RAVER2/RBFOX2/RBM8A/RBMX/SLU7/SRSF1/SRSF2/SRSF9/THRAP3/TRA2B	20
BP	GO:0000209	protein polyubiquitination	39/1199	246/18903	1.07367e-07	1.18238e-05	9.6983e-06	AMFR/ANKIB1/BIRC2/CBFB/CBL/CDC27/CTNNB1/DDX3X/FBXO28/FBXW11/ITCH/KLHL42/LNPEP/MARCHF6/MARCHF7/MDM2/NPEPPS/RC3H2/RMND5A/RNF14/SKP1/SMURF2/TNKS/TNKS2/TRIM2/TRIP12/TTC3/UBE2A/UBE2D2/UBE2E3/UBE2H/UBE2J1/UBE2K/UBE2N/UBE2V2/UBE3A/WSB2/XIAP/ZFP91	39
BP	GO:0030865	cortical cytoskeleton organization	17/1199	61/18903	1.45314e-07	1.55771e-05	1.27768e-05	AKAP11/ANLN/ARF6/CALR/ECT2/EPB41L2/NCKAP1/PAFAH1B1/PDCD6IP/PLS1/RAC1/RACGAP1/RHOA/RHOBTB3/RHOQ/ROCK1/ROCK2	17
BP	GO:0006997	nucleus organization	27/1199	139/18903	1.57436e-07	1.6552e-05	1.35765e-05	AGFG1/ATXN7/BAZ2A/CDK1/CHMP2B/CHMP3/GOLM1/H3-3B/HIPK2/LEMD3/LMNB2/NOLC1/PAFAH1B1/PITPNB/RRN3/RTN4/SEH1L/SELENOF/SERBP1/SMARCA5/SUMO1/SUN1/TARDBP/TMF1/TOR1AIP1/UBE2I/ZMPSTE24	27
BP	GO:0043488	regulation of mRNA stability	31/1199	175/18903	1.75309e-07	1.80833e-05	1.48325e-05	AGO2/AKT1/CNOT1/CNOT6/CNOT7/CSDE1/DCP2/DHX9/FMR1/HNRNPA0/HNRNPC/HNRNPU/IGF2BP3/NPM1/PABPC1/PATL1/PDE12/PUM2/RC3H2/ROCK1/ROCK2/SAMD4B/SERBP1/SYNCRIP/TAF15/TARDBP/TENT4B/THRAP3/YBX1/YTHDF3/ZC3H14	31
BP	GO:1903320	regulation of protein modification by small protein conjugation or removal	39/1199	252/18903	2.0556e-07	2.04327e-05	1.67595e-05	AKT1/BIRC2/BMI1/CHP1/COPS8/CTNNB1/DDX3X/DNAJA1/EPAS1/FKBP1A/HIF1A/HSP90AA1/HSP90AB1/ITCH/MAPK9/MARCHF7/NDFIP1/NDFIP2/NPM1/OTUD4/PSMD10/PTTG1IP/RPL11/RPL37/RPL5/RPS20/RPS7/SKP1/SPOPL/TGFBR1/TRIP12/U2AF2/UBA2/UBE2I/UBE2N/UBE2V2/UBE3A/UBQLN1/XIAP	39
BP	GO:0022411	cellular component disassembly	61/1199	483/18903	2.02228e-07	2.04327e-05	1.67595e-05	ABCE1/ADD3/APC/ARF6/ASPH/ATP2A2/ATXN7/BLCAP/BNIP3L/CALCOCO2/CALM1/CAMSAP2/CAPZA1/CAPZA2/CCSAP/CDK1/CFL1/CFL2/CHMP2B/CHMP3/CISD2/CLASP1/CLASP2/CTTN/DENR/DICER1/DSTN/EIF5A/EXOC8/FSCN1/GABARAPL2/GSK3B/GSPT1/HIF1A/HSPA8/KIF5B/LAMC1/LAMP2/LIMA1/LRBA/MAP1B/MAP1LC3B/MTPN/PAFAH1B1/PRKAA1/RB1CC1/RDX/SET/SLC25A46/SLC25A5/SMARCC1/SREBF2/STMN1/TAOK1/TGFBR1/TMOD3/TOP2A/TWF1/UBQLN1/VTA1/ZMPSTE24	61
BP	GO:0010506	regulation of autophagy	48/1199	344/18903	2.19744e-07	2.10761e-05	1.72873e-05	AKT1/ATP6V1A/ATP6V1C1/ATP6V1D/BNIP3L/CALCOCO2/CCNY/CISD2/CTTN/EIF4G2/EXOC4/EXOC8/GNAI3/GSK3B/HIF1A/HMGB1/MCL1/MET/MTDH/PAFAH1B2/PIK3C2A/PRKAA1/PRKACA/PSAP/RAB3GAP1/RB1CC1/ROCK1/SCOC/SEC22B/SH3GLB1/SLC25A5/SMG1/SNX6/SPTLC1/SREBF2/TAB2/TAB3/TMEM59/TP53INP1/UBQLN1/UBQLN2/USP33/VPS26A/VPS35/WAC/WDR41/WDR6/ZMPSTE24	48
BP	GO:1903829	positive regulation of protein localization	58/1199	451/18903	2.18369e-07	2.10761e-05	1.72873e-05	ACSL3/ACSL4/ADAM9/AKT1/APC/ARF6/ATP2B4/ATP2C1/CCT6A/CCT8/CD2AP/CD81/CDK1/CHP1/CTDSPL2/ECT2/EPB41L2/GLUD1/GLUL/GOLPH3/GSK3B/HIF1A/HSP90AA1/HSP90AB1/ITGB1/KIF5B/MSN/NMD3/NPEPPS/NPM1/NPTN/OAZ1/OAZ2/PLS1/PPM1A/PRKAA1/PRKACA/PRNP/RAN/RDX/ROCK2/RTN4/SAR1A/SAR1B/SEC24A/SERP1/SH3GLB1/SLC5A3/SREBF2/TARDBP/TFRC/TM7SF3/TMED10/TMEM30A/VPS35/WLS/XPO4/YAP1	58
BP	GO:0008088	axo-dendritic transport	19/1199	77/18903	2.2648e-07	2.13477e-05	1.751e-05	AP3M1/AP3S1/APP/ARL8B/BLOC1S6/FBXW11/HIF1A/HNRNPU/HSBP1/HSPA8/KIF1B/KIF3A/KIF5B/OPA1/PAFAH1B1/PURA/RAB21/STAU1/WASF1	19
BP	GO:0007163	establishment or maintenance of cell polarity	37/1199	234/18903	2.4213e-07	2.2436e-05	1.84027e-05	ACTB/ACTR2/ACTR3/ARF4/ARF6/ARPC5/CDC42/CLASP1/CLASP2/CLIC4/CTNNA1/ERBIN/FBXW11/FSCN1/GOLPH3/GSK3B/HSP90AA1/HSP90AB1/ITGB1/MAP1B/MAP4/MAPRE1/MSN/PAFAH1B1/PDCD6IP/RAB10/RAB11FIP2/RAC1/RAP1B/RHOA/RHOBTB3/RHOQ/RICTOR/ROCK1/ROCK2/SHTN1/SYNJ2BP	37
BP	GO:0000910	cytokinesis	32/1199	187/18903	2.53327e-07	2.30823e-05	1.89328e-05	ACTR2/ACTR3/ANLN/APC/ARF1/BIRC6/CALM1/CDC42/CETN2/CFL1/CHMP2B/CHMP3/ECT2/EXOC4/EXOC5/EXOC8/KLHL9/PDCD6IP/PKN2/PRPF40A/RAB11A/RACGAP1/RHOA/ROCK1/ROCK2/SEPTIN10/SEPTIN11/SEPTIN2/SEPTIN7/SH3GLB1/SON/STMN1	32
BP	GO:0043254	regulation of protein-containing complex assembly	54/1199	410/18903	2.65122e-07	2.3761e-05	1.94895e-05	ADD3/ARF6/ARPC5/ATF7IP/BIRC2/BRK1/CAMSAP2/CAND1/CAPZA1/CAPZA2/CDC42/CLASP1/CLIP1/COTL1/CTTN/DDX3X/FKBP4/FSCN1/GSK3B/H3-3B/HMGB1/HSP90AA1/HSPA8/MAP1B/MAPK9/MAPRE1/MET/MSN/MTPN/NCKAP1/NEK7/PFN2/PPM1A/PTPN11/RAC1/RAP1B/RB1/RDX/RHOA/RICTOR/RIOK3/SAR1A/SAR1B/SH3GLB1/SLF2/STMN1/STMP1/SUMO1/TFRC/TMOD3/TWF1/VPS35/VPS41/WARS1	54
BP	GO:0046822	regulation of nucleocytoplasmic transport	23/1199	109/18903	2.74123e-07	2.37878e-05	1.95115e-05	CDK1/CHP1/CTDSPL2/DHX9/ECT2/GSK3B/HSP90AA1/HSP90AB1/KHDRBS1/NCBP2/NOLC1/NUP58/PPM1A/PPP1R12A/PRKACA/PTPN11/RAN/SUMO1/TARDBP/THOC2/UHMK1/XPO1/XPO4	23
BP	GO:0006888	endoplasmic reticulum to Golgi vesicle-mediated transport	26/1199	134/18903	2.71974e-07	2.37878e-05	1.95115e-05	ARCN1/ARF4/CNIH4/COPA/COPB2/GOPC/INSIG1/KDELR1/LMAN1/LMAN2/PPP6C/RAB1A/SAR1A/SAR1B/SEC22B/SEC23A/SEC23IP/SEC24A/TMED10/TMED2/TMED4/TMED5/TMED7/USO1/YIPF5/YIPF6	26
BP	GO:0016236	macroautophagy	45/1199	317/18903	3.19129e-07	2.72606e-05	2.236e-05	AKT1/ARL8B/ATP2A2/ATP6V1A/ATP6V1C1/ATP6V1D/BNIP3L/CALCOCO2/CALM1/CHMP2B/CHMP3/EXOC4/EXOC8/GABARAPL2/GNAI3/HIF1A/LAMP2/LRBA/MAP1LC3B/NBR1/PAFAH1B2/PIKFYVE/PRKACA/RAB1A/RAB3GAP1/RB1CC1/SCOC/SEC22B/SH3GLB1/SLC25A5/SMG1/SNX6/SPTLC1/STX12/TMEM41B/TP53INP1/UBQLN1/UBQLN2/VPS26A/VPS35/VPS36/VPS41/VTA1/WAC/YOD1	45
BP	GO:0036503	ERAD pathway	23/1199	112/18903	4.58069e-07	3.85272e-05	3.16012e-05	AMFR/CALR/CANX/CCDC47/DNAJB14/DNAJC10/EDEM3/ERLEC1/ERLIN2/FAM8A1/HSP90B1/MAN1A1/MARCHF6/OS9/SEL1L/STT3B/UBE2J1/UBQLN1/UBQLN2/UBXN4/UGGT1/XBP1/YOD1	23
BP	GO:2001233	regulation of apoptotic signaling pathway	50/1199	374/18903	4.65346e-07	3.85462e-05	3.16168e-05	AKT1/BCLAF1/BIRC6/BMI1/CASP2/CSNK2A1/CTNNA1/CTNNB1/CTTN/DDX3X/DNAJA1/EIF5A/FEM1B/GHITM/GNAI3/GSK3B/HDAC1/HIF1A/HNRNPK/MAPK9/MARCHF7/MCL1/MDM2/OPA1/PAK2/PDIA3/PHIP/PPP2R1B/PSMD10/PTPN1/PTTG1IP/RB1/RB1CC1/RPL11/RPS6KB1/RPS7/RRM2B/RRN3/SERINC3/SKIL/SLC25A5/SOD2/TAF9B/TGFBR1/TMBIM6/TPT1/UBQLN1/XBP1/YAP1/ZMYND11	50
BP	GO:0033119	negative regulation of RNA splicing	11/1199	28/18903	5.02884e-07	4.08478e-05	3.35047e-05	HNRNPA2B1/HNRNPK/NPM1/PTBP1/PTBP3/RBMX/SRSF10/SRSF7/SRSF9/TMBIM6/U2AF2	11
BP	GO:0006611	protein export from nucleus	16/1199	59/18903	5.08075e-07	4.08478e-05	3.35047e-05	AHCYL1/CALR/CHP1/CSE1L/CTDSPL2/GSK3B/HSPA9/NUTF2/PPM1A/PRKACA/PTPN11/RAN/UHMK1/XPO1/XPO4/XPO7	16
BP	GO:0006470	protein dephosphorylation	39/1199	261/18903	5.18887e-07	4.11124e-05	3.37217e-05	ACP1/ARPP19/CALM1/CAMTA1/CTDSPL2/ENSA/FBXW11/FKBP1A/GSK3B/HSP90AB1/HSP90B1/MGAT5/MTMR2/PPM1A/PPP1CB/PPP1R12A/PPP1R15B/PPP2CA/PPP2CB/PPP2R1B/PPP2R5C/PPP2R5D/PPP3CA/PPP3R1/PPP4R2/PPP4R3B/PPP6C/PPP6R3/PPTC7/PTBP1/PTP4A2/PTPN1/PTPN11/RNGTT/ROCK1/ROCK2/RPRD1A/TIPRL/YWHAB	39
BP	GO:0061640	cytoskeleton-dependent cytokinesis	23/1199	113/18903	5.41072e-07	4.21428e-05	3.45669e-05	ACTR2/ACTR3/ANLN/APC/ARF1/CFL1/CHMP2B/CHMP3/ECT2/EXOC4/EXOC5/EXOC8/PDCD6IP/RACGAP1/RHOA/ROCK1/ROCK2/SEPTIN10/SEPTIN11/SEPTIN2/SEPTIN7/SON/STMN1	23
BP	GO:0051028	mRNA transport	25/1199	130/18903	5.47309e-07	4.21428e-05	3.45669e-05	AGFG1/CASC3/CETN2/DHX9/FMR1/FYTTD1/G3BP2/HNRNPA1/HNRNPA2B1/IGF2BP3/NCBP2/NUP50/NUP58/NUTF2/QKI/RANBP2/RBM8A/SEH1L/SLBP/SMG1/SRSF1/SRSF7/THOC2/TNKS/XPO1	25
BP	GO:0030866	cortical actin cytoskeleton organization	13/1199	40/18903	6.05257e-07	4.55948e-05	3.73983e-05	AKAP11/ANLN/ARF6/CALR/ECT2/EPB41L2/NCKAP1/PDCD6IP/PLS1/RACGAP1/RHOQ/ROCK1/ROCK2	13
BP	GO:0015931	nucleobase-containing compound transport	35/1199	223/18903	6.0882e-07	4.55948e-05	3.73983e-05	AGFG1/CASC3/CETN2/DHX9/FMR1/FYTTD1/G3BP2/HNRNPA1/HNRNPA2B1/IGF2BP3/KHDRBS1/NCBP2/NPM1/NUP50/NUP58/NUTF2/QKI/RAN/RANBP2/RBM8A/SEH1L/SLBP/SLC25A24/SLC25A36/SLC25A5/SLC35D1/SMG1/SRSF1/SRSF7/SSB/THOC2/TNKS/TOMM20/XPO1/YBX1	35
BP	GO:2001234	negative regulation of apoptotic signaling pathway	36/1199	233/18903	6.23211e-07	4.60418e-05	3.7765e-05	AKT1/BIRC6/BMI1/CSNK2A1/CTNNA1/CTNNB1/CTTN/DDX3X/DNAJA1/GHITM/GNAI3/GSK3B/HDAC1/HIF1A/MARCHF7/MCL1/MDM2/OPA1/PHIP/PSMD10/PTPN1/PTTG1IP/RB1/RB1CC1/RPS6KB1/RRM2B/RRN3/SLC25A5/SOD2/TAF9B/TGFBR1/TMBIM6/TPT1/XBP1/YAP1/ZMYND11	36
BP	GO:0022613	ribonucleoprotein complex biogenesis	60/1199	489/18903	6.82677e-07	4.97626e-05	4.08169e-05	ABCE1/ADAR/AGO1/AGO2/CDC73/CUL4B/DDX17/DDX21/DDX3X/DENR/DHX9/DICER1/EIF2S3/EIF3A/EIF3J/EIF3L/EIF4B/EIF4H/ERI1/GLUL/HSP90AA1/HSP90AB1/MTREX/NMD3/NOLC1/NPM1/NUDT21/PRKDC/PSIP1/PTGES3/RAN/RBMX/RIOK3/RPL11/RPL27/RPL38/RPL5/RPL7/RPL7A/RPS16/RPS24/RPS25/RPS7/RPSA/RRN3/RSL24D1/SCAF11/SF3B1/SF3B4/SLU7/SNU13/SRSF1/SRSF10/SRSF9/TENT4B/TGS1/UTP23/WDR36/XPO1/XRCC5	60
BP	GO:0072659	protein localization to plasma membrane	41/1199	285/18903	7.43012e-07	5.3448e-05	4.38398e-05	ACSL3/ACTB/AKT1/APPL1/ARF6/ARL6IP5/ATP1B3/ATP2B4/ATP2C1/ATP6AP1/BSG/CD81/CLASP2/CLTC/DENND4C/EFR3A/EXOC5/GOLPH3/GOPC/ITGB1/KIF5B/LRP6/LYPLA1/PICALM/PLS1/PREPL/PRNP/RAB10/RAB11A/RAB12/RAP1A/RAP2A/RDX/RHOQ/ROCK1/ROCK2/SEC23A/TMED2/TMEM59/VAMP3/VPS35	41
BP	GO:0043487	regulation of RNA stability	31/1199	187/18903	7.94017e-07	5.63752e-05	4.62408e-05	AGO2/AKT1/CNOT1/CNOT6/CNOT7/CSDE1/DCP2/DHX9/FMR1/HNRNPA0/HNRNPC/HNRNPU/IGF2BP3/NPM1/PABPC1/PATL1/PDE12/PUM2/RC3H2/ROCK1/ROCK2/SAMD4B/SERBP1/SYNCRIP/TAF15/TARDBP/TENT4B/THRAP3/YBX1/YTHDF3/ZC3H14	31
BP	GO:0016197	endosomal transport	37/1199	247/18903	9.4884e-07	6.49414e-05	5.3267e-05	ACAP2/ANKRD50/AP5M1/ARF6/ARFIP1/ARL1/ARL8B/ATP6AP1/CHMP2B/CHMP3/CLTC/CMTM6/EPS15/LAPTM4B/PICALM/PIKFYVE/PREPL/RAB10/RAB11A/RAB14/RAB6A/RHOBTB3/SNX1/SNX3/SNX6/SORT1/SPAG9/STX12/TBC1D23/TMEM50A/VAMP3/VPS26A/VPS35/VPS36/VTA1/WASHC4/ZFYVE16	37
BP	GO:0031330	negative regulation of cellular catabolic process	37/1199	247/18903	9.4884e-07	6.49414e-05	5.3267e-05	AKT1/ATP2B4/CSDE1/CSNK2A1/DHX9/EIF4G2/FMR1/HIPK2/HNRNPA0/HNRNPAB/HNRNPC/HNRNPU/HSP90AB1/IGF2BP3/MCL1/MET/MTMR2/PABPC1/ROCK1/RPL11/RPL5/RPS7/RYBP/SEC22B/SMARCC1/SMG1/SYNCRIP/TAB2/TAB3/TAF15/TARDBP/TENT4B/THRAP3/UCHL5/WAC/WDR6/YBX1	37
BP	GO:0097193	intrinsic apoptotic signaling pathway	42/1199	298/18903	9.50304e-07	6.49414e-05	5.3267e-05	AKT1/ARL6IP5/ATF2/BCLAF1/CASP2/CUL5/DDX3X/DDX5/DNAJA1/DNAJC10/EIF5A/ERO1A/GSKIP/HDAC1/HIF1A/HIPK1/HIPK2/HNRNPK/JMY/MARCHF7/MCL1/MDM2/OPA1/PERP/PRKDC/PTPN1/PTTG1IP/RPL11/RPS7/RRM2B/RRN3/SERINC3/SHISA5/SKIL/SOD2/STK24/TAF9B/TMBIM6/TNFRSF10B/TPT1/UBQLN1/XBP1	42
BP	GO:0032869	cellular response to insulin stimulus	33/1199	208/18903	9.87728e-07	6.66655e-05	5.46812e-05	AKT1/AP3S1/APC/APPL1/ATP2B1/DENND4C/EIF4EBP2/EPRS1/GSK3B/IDE/INSIG1/NUCKS1/OSBPL8/PHIP/PIK3C2A/PKM/PRKAA1/PRKDC/PTPN1/PTPN11/RAB10/RAB12/RB1/RHOQ/RPS6KB1/SLC39A14/SMARCC1/SP1/STAT1/SYAP1/USO1/XBP1/YWHAG	33
BP	GO:0070934	CRD-mediated mRNA stabilization	7/1199	11/18903	1.0688e-06	7.12575e-05	5.84477e-05	CSDE1/DHX9/HNRNPU/IGF2BP3/PABPC1/SYNCRIP/YBX1	7
BP	GO:2000767	positive regulation of cytoplasmic translation	8/1199	15/18903	1.10263e-06	7.17825e-05	5.88783e-05	CNBP/CSDE1/DHX9/HNRNPU/PABPC1/PKM/SYNCRIP/YBX1	8
BP	GO:0045732	positive regulation of protein catabolic process	33/1199	209/18903	1.10293e-06	7.17825e-05	5.88783e-05	ADAM9/AKT1/ANKIB1/APC/CD81/CSNK2A1/CUL4B/FMR1/GSK3B/HSP90AA1/IDE/ITCH/MAPK9/MDM2/MSN/NDFIP1/OAZ1/OAZ2/PSMD10/RDX/RNF14/SEC22B/SNX1/SOCS4/SUMO1/SUMO2/TMTC3/UBQLN1/UBQLN2/UBR3/VGLL4/VPS35/ZYG11B	33
BP	GO:0009895	negative regulation of catabolic process	45/1199	332/18903	1.18161e-06	7.59982e-05	6.23362e-05	AKT1/ATP2B4/AZIN1/CSDE1/CSNK2A1/DHX9/EIF4G2/FMR1/GABARAPL2/HIPK2/HMGCR/HNRNPA0/HNRNPAB/HNRNPC/HNRNPU/HSP90AB1/IGF2BP3/LAPTM4B/MARCHF7/MCL1/MET/MTMR2/PABPC1/PRKAA1/ROCK1/RPL11/RPL5/RPS7/RYBP/SEC22B/SMARCC1/SMG1/SNX3/SYNCRIP/TAB2/TAB3/TAF15/TARDBP/TENT4B/THRAP3/UCHL5/VPS35/WAC/WDR6/YBX1	45
BP	GO:0140694	non-membrane-bounded organelle assembly	50/1199	386/18903	1.20155e-06	7.63821e-05	6.26511e-05	ACTG1/ANLN/CCSAP/CDS2/CEP97/CETN2/CFL2/CHMP2B/CHMP3/CLASP1/CLASP2/CNOT1/CNOT6/CNOT7/CSDE1/DAZAP2/DDX3X/EIF2S1/FSCN1/G3BP1/G3BP2/HNRNPU/ITGB1/LSM14A/MAPK9/MAPRE1/MSN/NEK7/NPM1/PATL1/PLS1/PRKAA1/PRKAR1A/PRKDC/PUM2/RAB11A/RACGAP1/RHOA/RPL11/RPL38/RPL5/RPS23/RPSA/SMC1A/STAG2/TMOD3/TNKS/UBAP2L/XRCC5/YTHDF3	50
BP	GO:2001020	regulation of response to DNA damage stimulus	43/1199	312/18903	1.29995e-06	8.16875e-05	6.70027e-05	ACTB/ACTR2/ARMT1/ATXN7/BAZ1B/BCLAF1/DDX5/DEK/DHX9/FEM1B/FMR1/HMGB1/HNRNPK/INO80D/KLHL15/MARCHF7/MCL1/MDM2/MORF4L1/MORF4L2/NPM1/NSD2/PBRM1/PHF10/PPP4R2/PPP4R3B/PRKDC/PSMD10/PTTG1IP/SHLD2/SKIL/SLF2/SMARCA5/SMARCC1/SMG1/TAF9B/TPT1/TRIP12/UBE2N/UBE2V2/UCHL5/USP1/ZMPSTE24	43
BP	GO:0050686	negative regulation of mRNA processing	10/1199	25/18903	1.37876e-06	8.56553e-05	7.02573e-05	HNRNPA2B1/HNRNPK/NPM1/PTBP1/RBMX/SRSF10/SRSF7/SRSF9/U2AF2/ZC3H14	10
BP	GO:0031647	regulation of protein stability	44/1199	325/18903	1.59836e-06	9.81823e-05	8.05323e-05	ASPH/ATF7IP/ATP1B3/CALR/CCT6A/CCT8/CD81/CDC73/CHP1/CMTM6/CREB1/DAZAP2/DDI2/FBXW11/GNAQ/HSP90AA1/HSP90AB1/HSPA8/KRAS/LAMP1/LAMP2/MAPK1/MARCHF7/MDM2/MFSD1/NPM1/PFN2/PRKDC/PRNP/PTGES3/RAB21/RPL11/RPL5/RPS7/RTN4/SEL1L/SH3GLB1/STX12/SUMO1/TAF9B/TARDBP/USP33/VBP1/VPS35	44
BP	GO:0007030	Golgi organization	28/1199	165/18903	1.66202e-06	0.000100958	8.28094e-05	ARL1/ATL3/CAMSAP2/CDC42/CDK1/CLASP1/CLASP2/GOLPH3/HOOK1/LMAN1/LMAN2/LYSMD3/MAP2K1/MAPK1/PI4K2B/RAB1A/RAB2A/SEC22B/SEC23IP/SURF4/TMED10/TMED2/TMED4/TMED5/TMED7/USO1/YIPF5/YWHAZ	28
BP	GO:0007033	vacuole organization	33/1199	213/18903	1.69971e-06	0.000102113	8.37568e-05	ARL8B/ATF2/ATP2A2/ATP6AP1/ATP6AP2/ATP6V1A/ATP6V1D/CHMP2B/CHMP3/GABARAPL2/GNPTAB/HOOK1/LAPTM4B/LRBA/MAN2A1/MAP1LC3B/MBTPS1/PIKFYVE/PPT1/RAB14/RAB1A/RAB3GAP1/RB1CC1/SCARB2/SEC22B/SH3GLB1/STX12/TMEM41B/TP53INP1/TPP1/UBQLN1/UBQLN2/VPS35	33
BP	GO:1990778	protein localization to cell periphery	45/1199	337/18903	1.78467e-06	0.000106052	8.69873e-05	ACSL3/ACTB/AKT1/APPL1/ARF6/ARL6IP5/ATP1B3/ATP2B4/ATP2C1/ATP6AP1/BSG/CD81/CLASP2/CLTC/DAG1/DENND4C/EFR3A/EPB41L2/EXOC5/GOLPH3/GOPC/GPC4/ITGB1/KIF5B/LRP6/LYPLA1/PICALM/PLS1/PREPL/PRNP/RAB10/RAB11A/RAB12/RABEP1/RAP1A/RAP2A/RDX/RHOQ/ROCK1/ROCK2/SEC23A/TMED2/TMEM59/VAMP3/VPS35	45
BP	GO:0007032	endosome organization	20/1199	96/18903	2.00142e-06	0.000117654	9.65033e-05	ARFGEF2/ATP6AP1/ATP6AP2/ATP6V1A/ATP6V1D/CHMP2B/CHMP3/EXOC8/HOOK1/LAPTM4B/PDCD6IP/PI4K2B/RAB11A/RAB5B/SCARB2/SNX10/SNX3/VPS36/VTA1/WASHC4	20
BP	GO:0072384	organelle transport along microtubule	19/1199	88/18903	2.03985e-06	0.000118637	9.73099e-05	AP3M1/AP3S1/BLOC1S6/CDC42/FBXW11/HIF1A/HSBP1/KIF3A/KIF5B/LAMP1/MAP1B/OPA1/PAFAH1B1/RAB1A/RAB6A/RHOT1/SUN1/SYNE2/WASF1	19
BP	GO:1900151	regulation of nuclear-transcribed mRNA catabolic process, deadenylation-dependent decay	10/1199	26/18903	2.11324e-06	0.000121611	9.97496e-05	AGO2/CNOT1/CNOT7/CSDE1/DHX9/HNRNPU/PABPC1/SYNCRIP/TENT4B/YBX1	10
BP	GO:0010970	transport along microtubule	28/1199	168/18903	2.39821e-06	0.000136573	0.000112022	AP3M1/AP3S1/APP/ARL8B/BLOC1S6/CDC42/FBXW11/HIF1A/HNRNPU/HSBP1/HSPA8/KIF1B/KIF3A/KIF5B/LAMP1/MAP1B/OPA1/PAFAH1B1/PURA/RAB1A/RAB21/RAB6A/RHOT1/SSX2IP/STAU1/SUN1/SYNE2/WASF1	28
BP	GO:1900152	negative regulation of nuclear-transcribed mRNA catabolic process, deadenylation-dependent decay	7/1199	12/18903	2.42404e-06	0.000136621	0.000112061	CSDE1/DHX9/HNRNPU/PABPC1/SYNCRIP/TENT4B/YBX1	7
BP	GO:0007265	Ras protein signal transduction	46/1199	353/18903	2.70196e-06	0.000150731	0.000123634	ABI2/ARF6/ARFGEF2/ARHGAP5/ARHGEF12/BRK1/CBL/CDC42/CFL1/DENND4C/ERBIN/F2R/G3BP1/G3BP2/GNA13/GNB1/HACD3/ITGB1/KRAS/MET/NCKAP1/NOTCH2/NRAS/PPP2CB/RAB12/RAB21/RAB4A/RAC1/RACGAP1/RALGPS2/RAP1A/RAP1B/RAP2A/RAP2C/RB1/RDX/RHOA/ROCK1/ROCK2/SHOC2/SHTN1/SOS1/SSX2IP/STMN1/SYNJ2BP/WASF1	46
BP	GO:0030705	cytoskeleton-dependent intracellular transport	32/1199	208/18903	2.83326e-06	0.000156459	0.000128333	AP3M1/AP3S1/APP/ARL8B/BLOC1S6/CCDC186/CDC42/FBXW11/FNBP1L/HIF1A/HNRNPU/HOOK1/HSBP1/HSPA8/KIF1B/KIF3A/KIF5B/LAMP1/MAP1B/MYO6/OPA1/PAFAH1B1/PURA/RAB1A/RAB21/RAB6A/RHOT1/SSX2IP/STAU1/SUN1/SYNE2/WASF1	32
BP	GO:0061014	positive regulation of mRNA catabolic process	21/1199	107/18903	3.08736e-06	0.000167238	0.000137174	AGO2/CNOT1/CNOT6/CNOT7/CSDE1/DCP2/DHX9/HNRNPU/PABPC1/PATL1/PDE12/RC3H2/ROCK1/ROCK2/SAMD4B/SYNCRIP/TARDBP/TENT4B/YBX1/YTHDF3/ZC3HAV1	21
BP	GO:0032388	positive regulation of intracellular transport	31/1199	199/18903	3.08963e-06	0.000167238	0.000137174	CD81/CDK1/CHP1/CTDSPL2/DHX9/ECT2/GSK3B/HSP90AA1/HSP90AB1/KHDRBS1/MSN/MTMR2/NCBP2/NPEPPS/OAZ1/OAZ2/PPM1A/PRKAA1/PRKACA/PRNP/RAB21/RAN/RDX/SAR1A/SAR1B/SCP2/SH3GLB1/SREBF2/TARDBP/TMEM30A/XPO4	31
BP	GO:0010639	negative regulation of organelle organization	47/1199	366/18903	3.17282e-06	0.000170057	0.000139486	ADD3/AKT1/APC/ATRX/ATXN7/BAZ1B/CAMSAP2/CAPZA1/CAPZA2/CEP97/CLASP1/CLASP2/DCP2/FKBP4/GDI2/GHITM/GMFB/H3-3B/HNRNPA1/HNRNPC/HNRNPU/LIMA1/MAP1B/MAP4/MAPRE1/MET/MTPN/NPM1/OPA1/PAK2/PFN2/PSMD10/RAD21/RDX/SEC22B/SLC25A5/SMARCA5/STMN1/TAOK1/TENT4B/TFRC/TMOD3/TNKS/TNKS2/TOP2A/TWF1/YAP1	47
BP	GO:0019080	viral gene expression	20/1199	100/18903	3.89293e-06	0.000206628	0.000169483	CANX/CCNT1/CSDE1/DENR/DHX9/EIF3A/EIF3L/GALNT1/GSK3B/HDAC1/MAN2A1/MGAT5/NUCKS1/PTBP1/RSF1/SP1/SPCS3/SSB/TARDBP/UBP1	20
BP	GO:0000288	nuclear-transcribed mRNA catabolic process, deadenylation-dependent decay	16/1199	68/18903	3.96024e-06	0.000208179	0.000170755	AGO2/CNOT1/CNOT6/CNOT7/CSDE1/DCP2/DHX9/HNRNPU/PABPC1/PATL1/PDE12/RC3H2/SAMD4B/SYNCRIP/TENT4B/YBX1	16
BP	GO:0097581	lamellipodium organization	19/1199	92/18903	4.11019e-06	0.000214004	0.000175533	ABI1/ABI2/ACTR2/ACTR3/AKIRIN1/ARPC5/BRK1/CDC42/CTTN/FSCN1/GOLPH3/HSP90AA1/ITGB1/NCKAP1/RAC1/SNX1/TWF1/VCL/WASF1	19
BP	GO:0071826	ribonucleoprotein complex subunit organization	35/1199	242/18903	4.17248e-06	0.000215198	0.000176512	ADAR/AGO1/AGO2/CDC73/DENR/DHX9/DICER1/EIF2S3/EIF3A/EIF3J/EIF3L/EIF4B/EIF4H/HSP90AA1/HSP90AB1/KIF5B/NUDT21/PRKDC/PSIP1/PTGES3/RBMX/RPL11/RPL38/RPL5/RPSA/SCAF11/SF3B1/SF3B4/SLU7/SNU13/SRSF1/SRSF10/SRSF9/TGS1/XRCC5	35
BP	GO:0070918	small regulatory ncRNA processing	15/1199	61/18903	4.39814e-06	0.000222689	0.000182657	ADAR/AGO1/AGO2/DDX3X/DDX5/DICER1/HNRNPA2B1/MAP2K1/NCBP2/PPP3CA/PUM2/TRUB1/TSN/TSNAX/ZMPSTE24	15
BP	GO:0051261	protein depolymerization	22/1199	118/18903	4.3992e-06	0.000222689	0.000182657	ADD3/APC/ASPH/ATXN7/CAMSAP2/CAPZA1/CAPZA2/CCSAP/CFL1/CFL2/CLASP1/CLASP2/DSTN/HSPA8/LIMA1/MAP1B/MTPN/RDX/STMN1/TAOK1/TMOD3/TWF1	22
BP	GO:0007004	telomere maintenance via telomerase	16/1199	69/18903	4.85515e-06	0.000243515	0.000199739	CCT6A/CCT8/CTNNB1/DCP2/HNRNPA1/HNRNPC/HNRNPU/HSP90AA1/HSP90AB1/MAPK1/NEK7/PTGES3/TENT4B/TNKS/TNKS2/XRCC5	16
BP	GO:0030968	endoplasmic reticulum unfolded protein response	17/1199	77/18903	5.05601e-06	0.000251284	0.000206111	AMFR/CCND1/DNAJC10/EIF2S1/ERLEC1/ERMP1/ERO1A/MBTPS1/MBTPS2/OS9/PPP1R15B/PTPN1/SERP1/TMED2/TMEM33/XBP1/YOD1	17
BP	GO:0022618	ribonucleoprotein complex assembly	34/1199	234/18903	5.13982e-06	0.000252545	0.000207145	ADAR/AGO1/AGO2/CDC73/DENR/DHX9/DICER1/EIF2S3/EIF3A/EIF3J/EIF3L/EIF4B/EIF4H/HSP90AA1/HSP90AB1/NUDT21/PRKDC/PSIP1/PTGES3/RBMX/RPL11/RPL38/RPL5/RPSA/SCAF11/SF3B1/SF3B4/SLU7/SNU13/SRSF1/SRSF10/SRSF9/TGS1/XRCC5	34
BP	GO:0032970	regulation of actin filament-based process	50/1199	406/18903	5.17377e-06	0.000252545	0.000207145	ABI2/ACTG1/ADD3/ARF1/ARF6/ARFIP1/ARPC5/ATP2A2/BRK1/CAPZA1/CAPZA2/CD2AP/CDC42/CFL2/CLASP1/CLASP2/COTL1/CTTN/DSC2/DSG2/DSP/DSTN/ECT2/FSCN1/GMFB/IQGAP1/LIMA1/MET/MTPN/NCKAP1/NOTCH2/PAK2/PAM/PFN2/RAC1/RDX/RHOA/RHOBTB3/RHOQ/RICTOR/ROCK1/ROCK2/STMN1/SUMO1/TAOK1/TGFBR1/TMOD3/TWF1/WASF1/WASHC4	50
BP	GO:1902903	regulation of supramolecular fiber organization	48/1199	384/18903	5.29438e-06	0.000256145	0.000210098	ABI2/ACTG1/ADD3/APC/APP/ARF1/ARF6/ARFIP1/ARPC5/ATXN7/BRK1/CAMSAP2/CAPZA1/CAPZA2/CDC42/CFL2/CLASP1/CLASP2/CLIP1/COTL1/CTTN/DSTN/FKBP4/GMFB/HSPA8/LIMA1/MAP1B/MAPRE1/MET/MTPN/NCKAP1/PAK2/PFN2/RAC1/RB1/RDX/RHOA/RICTOR/ROCK1/ROCK2/STMN1/TAOK1/TGFBR1/TMOD3/TWF1/VBP1/WASF1/WASHC4	48
BP	GO:0000381	regulation of alternative mRNA splicing, via spliceosome	15/1199	62/18903	5.46457e-06	0.000259781	0.000213081	DDX17/DDX5/FMR1/HNRNPA1/HNRNPU/KHDRBS1/MBNL1/PTBP1/RAVER2/RBFOX2/RBM8A/RBMX/SRSF2/THRAP3/TRA2B	15
BP	GO:0051348	negative regulation of transferase activity	38/1199	276/18903	5.41959e-06	0.000259781	0.000213081	ADAR/AKT1/APC/CBL/CHORDC1/CHP1/DNAJA1/EIF4A2/GGNBP2/GNAQ/GSK3B/GSKIP/HIPK3/HMGCR/HNRNPU/IBTK/IPO7/LRP6/LYN/MACROH2A1/NPM1/PAK2/PAQR3/PRDX3/PRKAR1A/PRKAR2A/PTPN1/RB1/RPL11/RPL37/RPL5/RPS20/RPS7/SH3BP5/SNX6/SOCS4/WARS1/YWHAG	38
BP	GO:0019058	viral life cycle	42/1199	319/18903	5.59659e-06	0.000263763	0.000216347	ADAR/ARL8B/BSG/CD46/CD81/CDK1/CHMP2B/CHMP3/CNOT7/CTSB/DAG1/DDX3X/DEK/EPS15/FMR1/HACD3/HMGB1/HSP90AB1/HSPA8/IDE/ITCH/ITGB1/KPNA3/LAMP1/NUCKS1/PABPC1/PDCD6IP/PDE12/PIKFYVE/PKN2/RAB1A/RPSA/SCARB2/SNX3/STAU1/TFRC/TMEM41B/TOP2A/TOP2B/VTA1/XPR1/ZC3HAV1	42
BP	GO:0048025	negative regulation of mRNA splicing, via spliceosome	9/1199	23/18903	5.85132e-06	0.000273412	0.000224261	HNRNPA2B1/HNRNPK/NPM1/PTBP1/RBMX/SRSF10/SRSF7/SRSF9/U2AF2	9
BP	GO:0061157	mRNA destabilization	20/1199	103/18903	6.2469e-06	0.000289422	0.000237393	AGO2/CNOT1/CNOT6/CNOT7/CSDE1/DCP2/DHX9/HNRNPU/PABPC1/PATL1/PDE12/RC3H2/ROCK1/ROCK2/SAMD4B/SYNCRIP/TARDBP/TENT4B/YBX1/YTHDF3	20
BP	GO:2000641	regulation of early endosome to late endosome transport	8/1199	18/18903	6.31336e-06	0.000290043	0.000237903	CHMP3/MAP2K1/MAPK1/MSN/MTMR2/RAB21/RDX/SNX3	8
BP	GO:1904951	positive regulation of establishment of protein localization	41/1199	310/18903	6.44479e-06	0.000293614	0.000240831	ACSL3/ACSL4/ADAM9/ARF6/ATP2C1/CCT6A/CCT8/CD2AP/CD81/CDK1/CHP1/CTDSPL2/ECT2/GLUD1/GLUL/GOLPH3/GSK3B/HIF1A/HSP90AA1/HSP90AB1/NPEPPS/OAZ1/OAZ2/PPM1A/PRKAA1/PRKACA/PRNP/RAN/SAR1A/SAR1B/SEC24A/SERP1/SH3GLB1/SREBF2/TARDBP/TM7SF3/TMED10/TMEM30A/VPS35/WLS/XPO4	41
BP	GO:0010592	positive regulation of lamellipodium assembly	10/1199	29/18903	6.68805e-06	0.000299124	0.000245351	ABI2/ACTR2/ACTR3/AKIRIN1/BRK1/CDC42/FSCN1/HSP90AA1/NCKAP1/RAC1	10
BP	GO:2000765	regulation of cytoplasmic translation	10/1199	29/18903	6.68805e-06	0.000299124	0.000245351	CNBP/CPEB4/CSDE1/DHX9/FMR1/HNRNPU/PABPC1/PKM/SYNCRIP/YBX1	10
BP	GO:2000278	regulation of DNA biosynthetic process	22/1199	121/18903	6.72989e-06	0.000299124	0.000245351	BMPR2/CCT6A/CCT8/CTNNB1/DCP2/HNRNPA1/HNRNPA2B1/HNRNPC/HNRNPU/HSP90AA1/HSP90AB1/MAPK1/NEK7/PARM1/PARP4/PTGES3/TENT4B/TFDP1/TNKS/TNKS2/USP1/XRCC5	22
BP	GO:1903050	regulation of proteolysis involved in protein catabolic process	33/1199	227/18903	6.96065e-06	0.000306886	0.000251718	AKT1/ANKIB1/CSNK2A1/FMR1/GABARAPL2/GSK3B/HIPK2/HSP90AB1/MAPK9/MARCHF7/MDM2/PRKACA/PSMD10/RAD23B/RNF14/RPL11/RPL5/RPS7/RYBP/SMARCC1/SOCS4/SUMO1/SUMO2/TMF1/TMTC3/UBE2K/UBE3A/UBQLN1/UBQLN2/UCHL5/WAC/XPO1/ZYG11B	33
BP	GO:0051650	establishment of vesicle localization	30/1199	197/18903	7.06491e-06	0.000308991	0.000253444	AP3M1/AP3S1/BLOC1S6/CCDC186/CLASP1/CLASP2/CTNNB1/EXOC4/EXOC5/EXOC8/FAM91A1/FBXW11/FNBP1L/KIF3A/KIF5B/MYO6/PAFAH1B1/PDCD6IP/PICALM/PPP6C/RAB11A/RAB1A/SAR1A/SAR1B/SNAP23/STARD3NL/TBC1D23/TMED10/TMED2/TMEM230	30
BP	GO:0006892	post-Golgi vesicle-mediated transport	20/1199	104/18903	7.27942e-06	0.000315846	0.000259067	ACSL3/AP3S1/ARFGEF2/ATP2C1/EPS15/EXOC4/EXOC5/EXOC8/GOLPH3/GOPC/LAMP1/LYPLA1/PREPL/RAB10/RAB14/RABEP1/SCAMP1/SNAP23/SORT1/VAMP3	20
BP	GO:0051054	positive regulation of DNA metabolic process	40/1199	301/18903	7.41359e-06	0.000319135	0.000261765	ACTB/ACTR2/AKT1/ATRX/CCT6A/CCT8/CDK1/CTNNB1/DHX9/HMGB1/HNRNPA1/HNRNPA2B1/HNRNPAB/HSP90AA1/HSP90AB1/INO80D/MAP2K4/MAPK1/MORF4L1/MORF4L2/NEK7/NSD2/OTUD4/PARM1/PBRM1/PHF10/PRKDC/PTGES3/SHLD2/SLF2/SMARCA5/SMARCC1/TFRC/TNKS/TNKS2/UBE2N/UBE2V2/UCHL5/USP1/XRCC5	40
BP	GO:0098876	vesicle-mediated transport to the plasma membrane	25/1199	150/18903	8.18159e-06	0.000349443	0.000286625	ACAP2/ACSL3/ANKRD50/ARF6/ARFGEF2/ATP2C1/ATP6AP1/CMTM6/EPS15/EXOC4/EXOC5/EXOC8/GOLPH3/GOPC/LYPLA1/PREPL/RAB10/RAB11A/RAB14/RABEP1/SNX3/STX12/VAMP3/VPS26A/VPS35	25
BP	GO:1901879	regulation of protein depolymerization	18/1199	88/18903	8.43234e-06	0.000357361	0.000293119	ADD3/APC/ASPH/ATXN7/CAMSAP2/CAPZA1/CAPZA2/CFL2/CLASP1/CLASP2/DSTN/LIMA1/MAP1B/MTPN/RDX/TAOK1/TMOD3/TWF1	18
BP	GO:0006605	protein targeting	42/1199	325/18903	8.92824e-06	0.000375467	0.00030797	AP3M1/ARL6IP1/BNIP3L/CHM/CHP1/ERBIN/GNPTAB/GRPEL2/HSP90AA1/HSPA8/LAMP2/LMAN1/MAN1A1/NCOA4/NPEPPS/OS9/PEX13/PIKFYVE/PRKAA1/PRNP/RPL11/SCARB2/SEC62/SH3GLB1/SORT1/SPCS3/SREBF2/SRP14/SRP72/SSR1/SYNJ2BP/TIMM17A/TOMM20/TOMM34/TRAM1/VPS41/YWHAB/YWHAG/YWHAQ/YWHAZ/ZDHHC9/ZFYVE16	42
BP	GO:0034250	positive regulation of cellular amide metabolic process	27/1199	170/18903	9.11387e-06	0.000377466	0.00030961	CNBP/CSDE1/DDX3X/DHX9/DNAJC3/EIF2S3/EIF5A/FMR1/HNRNPU/KHDRBS1/LARP4/NPM1/PABPC1/PICALM/PKM/PRKDC/RHOA/ROCK2/RPL5/RPS6KB1/SERP1/SP1/SYNCRIP/TENT4B/UHMK1/YBX1/YTHDF3	27
BP	GO:2000058	regulation of ubiquitin-dependent protein catabolic process	27/1199	170/18903	9.11387e-06	0.000377466	0.00030961	AKT1/ANKIB1/CSNK2A1/GSK3B/HIPK2/HSP90AB1/MAPK9/MDM2/PSMD10/RAD23B/RNF14/RPL11/RPL5/RPS7/RYBP/SMARCC1/SOCS4/SUMO1/SUMO2/UBE2K/UBE3A/UBQLN1/UBQLN2/UCHL5/WAC/XPO1/ZYG11B	27
BP	GO:0031396	regulation of protein ubiquitination	31/1199	210/18903	9.55284e-06	0.000392672	0.000322082	AKT1/BIRC2/BMI1/CHP1/DDX3X/DNAJA1/FKBP1A/HSP90AA1/HSP90AB1/MAPK9/MARCHF7/NDFIP1/NDFIP2/NPM1/PSMD10/PTTG1IP/RPL11/RPL37/RPL5/RPS20/RPS7/SKP1/SPOPL/TGFBR1/TRIP12/U2AF2/UBE2N/UBE2V2/UBE3A/UBQLN1/XIAP	31
BP	GO:0051222	positive regulation of protein transport	39/1199	294/18903	1.00154e-05	0.000408614	0.000335159	ACSL3/ACSL4/ADAM9/ARF6/ATP2C1/CD2AP/CD81/CDK1/CHP1/CTDSPL2/ECT2/GLUD1/GLUL/GOLPH3/GSK3B/HIF1A/HSP90AA1/HSP90AB1/NPEPPS/OAZ1/OAZ2/PPM1A/PRKAA1/PRKACA/PRNP/RAN/SAR1A/SAR1B/SEC24A/SERP1/SH3GLB1/SREBF2/TARDBP/TM7SF3/TMED10/TMEM30A/VPS35/WLS/XPO4	39
BP	GO:0007059	chromosome segregation	47/1199	382/18903	1.0097e-05	0.000408892	0.000335387	ACTB/ACTR2/ACTR3/APC/ARL8B/ATRX/BAZ1B/CDC27/CDC42/CHMP2B/CHMP3/CSNK2A1/CTCF/CTNNB1/DDX3X/ECT2/HNRNPU/MACROH2A1/MAPRE1/NAA50/PBRM1/PDS5A/PHF10/PUM2/RAB11A/RACGAP1/RAD21/RAN/RB1/RCC2/RIOK3/SEH1L/SKA2/SLC25A5/SLF2/SMARCA5/SMARCAD1/SMARCC1/SMC1A/SMC4/STAG2/SUN1/TNKS/TOP1/TOP2A/TOP2B/UBE2I	47
BP	GO:0010833	telomere maintenance via telomere lengthening	17/1199	81/18903	1.04058e-05	0.000415246	0.000340598	CCT6A/CCT8/CTNNB1/DCP2/HNRNPA1/HNRNPA2B1/HNRNPC/HNRNPU/HSP90AA1/HSP90AB1/MAPK1/NEK7/PTGES3/TENT4B/TNKS/TNKS2/XRCC5	17
BP	GO:0033044	regulation of chromosome organization	35/1199	252/18903	1.03629e-05	0.000415246	0.000340598	ACTB/APC/ATF7IP/ATRX/BAZ1B/CCT6A/CCT8/CDC27/CTCF/CTNNB1/DCP2/H3-3B/HNRNPA1/HNRNPA2B1/HNRNPC/HNRNPU/INO80D/MACROH2A1/MAPK1/NEK7/PBRM1/PHF10/RAD21/RB1/SLF2/SMARCA5/SMARCC1/SMC4/SMG1/TENT4B/TNKS/TNKS2/TOP2A/UCHL5/XRCC5	35
BP	GO:0045727	positive regulation of translation	24/1199	143/18903	1.09158e-05	0.00043244	0.000354702	CNBP/CSDE1/DDX3X/DHX9/DNAJC3/EIF2S3/EIF5A/FMR1/HNRNPU/KHDRBS1/LARP4/NPM1/PABPC1/PKM/PRKDC/RHOA/RPL5/RPS6KB1/SERP1/SYNCRIP/TENT4B/UHMK1/YBX1/YTHDF3	24
BP	GO:0050779	RNA destabilization	20/1199	107/18903	1.13659e-05	0.000447033	0.000366671	AGO2/CNOT1/CNOT6/CNOT7/CSDE1/DCP2/DHX9/HNRNPU/PABPC1/PATL1/PDE12/RC3H2/ROCK1/ROCK2/SAMD4B/SYNCRIP/TARDBP/TENT4B/YBX1/YTHDF3	20
BP	GO:0034249	negative regulation of cellular amide metabolic process	38/1199	285/18903	1.15123e-05	0.000449554	0.000368739	AGO1/AGO2/CALR/CAPRIN1/CNOT1/CNOT6/CNOT7/CPEB4/CSDE1/DCP2/DDX3X/DHX9/EIF2AK1/EIF2S1/EIF4EBP2/EPRS1/FMR1/HNRNPU/IGF2BP3/IREB2/LSM14A/PABPC1/PATL1/PDE12/PRKAA1/PRNP/PURA/RC3H2/ROCK1/ROCK2/RTN3/RTN4/SAMD4B/SYNCRIP/TARDBP/TENT4B/YBX1/YTHDF3	38
BP	GO:0051648	vesicle localization	31/1199	213/18903	1.27697e-05	0.000494585	0.000405674	AP3M1/AP3S1/BLOC1S6/CCDC186/CLASP1/CLASP2/CTNNB1/EXOC4/EXOC5/EXOC8/FAM91A1/FBXW11/FNBP1L/KIF3A/KIF5B/MYO6/PAFAH1B1/PDCD6IP/PICALM/PPP6C/RAB11A/RAB1A/SAR1A/SAR1B/SNAP23/STARD3NL/TBC1D23/TMED10/TMED2/TMEM230/USO1	31
BP	GO:0007015	actin filament organization	53/1199	454/18903	1.28464e-05	0.000494585	0.000405674	ABI1/ABI2/ACTG1/ACTR2/ACTR3/ADD3/ARF1/ARF6/ARFIP1/ARPC5/BRK1/CALD1/CAPZA1/CAPZA2/CD2AP/CDC42/CFL1/CFL2/CLASP1/CLASP2/COTL1/CTNNA1/CTTN/DSTN/ENAH/FSCN1/GMFB/HSP90B1/JMY/LIMA1/MET/MTPN/MYO6/NCKAP1/PAK2/PFN2/PLS1/PLS3/RAC1/RDX/RHOA/RHOBTB3/RICTOR/ROCK1/ROCK2/SHTN1/STMN1/TGFBR1/TMOD3/TPM3/TWF1/WASF1/WASHC4	53
BP	GO:0043244	regulation of protein-containing complex disassembly	22/1199	126/18903	1.31884e-05	0.000504202	0.000413563	ADD3/APC/ASPH/ATXN7/CALCOCO2/CAMSAP2/CAPZA1/CAPZA2/CFL2/CLASP1/CLASP2/DSTN/EIF5A/GSPT1/LIMA1/MAP1B/MTPN/RDX/TAOK1/TMOD3/TWF1/ZMPSTE24	22
BP	GO:0070507	regulation of microtubule cytoskeleton organization	25/1199	155/18903	1.47161e-05	0.000554848	0.000455104	APC/ATXN7/CAMSAP2/CCSAP/CEP97/CHMP2B/CHMP3/CLASP1/CLASP2/CLIP1/CLTC/FKBP4/GSK3B/HNRNPU/MAP1B/MAPRE1/MET/PAFAH1B1/PRKAA1/RAC1/RHOA/ROCK1/SKA2/STMN1/TAOK1	25
BP	GO:0032956	regulation of actin cytoskeleton organization	45/1199	365/18903	1.47076e-05	0.000554848	0.000455104	ABI2/ACTG1/ADD3/ARF1/ARF6/ARFIP1/ARPC5/BRK1/CAPZA1/CAPZA2/CD2AP/CDC42/CFL2/CLASP1/CLASP2/COTL1/CTTN/DSTN/ECT2/FSCN1/GMFB/IQGAP1/LIMA1/MET/MTPN/NCKAP1/NOTCH2/PAK2/PAM/PFN2/RAC1/RDX/RHOA/RHOBTB3/RHOQ/RICTOR/ROCK1/ROCK2/STMN1/TAOK1/TGFBR1/TMOD3/TWF1/WASF1/WASHC4	45
BP	GO:0006278	RNA-templated DNA biosynthetic process	16/1199	75/18903	1.51357e-05	0.00056676	0.000464875	CCT6A/CCT8/CTNNB1/DCP2/HNRNPA1/HNRNPC/HNRNPU/HSP90AA1/HSP90AB1/MAPK1/NEK7/PTGES3/TENT4B/TNKS/TNKS2/XRCC5	16
BP	GO:0016574	histone ubiquitination	13/1199	52/18903	1.56508e-05	0.000579329	0.000475185	BMI1/CDC73/CTR9/CUL4B/PCGF3/PCGF5/RYBP/SKP1/SUZ12/TRIP12/UBE2A/UBE2N/WAC	13
BP	GO:0009267	cellular response to starvation	27/1199	175/18903	1.56833e-05	0.000579329	0.000475185	ATF2/BMPR2/CPEB4/DSC2/EIF2S1/FADS1/GABARAPL2/GLUL/HNRNPA1/HSPA8/JMY/KLF10/LAMP2/LARS1/MAP1LC3B/MAPK1/PRKAA1/SEH1L/SH3GLB1/SLC38A2/SP1/SREBF2/STK24/USP33/VPS41/XBP1/XPR1	27
BP	GO:0032204	regulation of telomere maintenance	19/1199	101/18903	1.69964e-05	0.000623619	0.000511513	ATRX/CCT6A/CCT8/CTNNB1/DCP2/HNRNPA1/HNRNPA2B1/HNRNPC/HNRNPU/INO80D/MAPK1/NEK7/SLF2/SMG1/TENT4B/TNKS/TNKS2/UCHL5/XRCC5	19
BP	GO:0032868	response to insulin	36/1199	269/18903	1.78684e-05	0.000651242	0.00053417	AKT1/AP3S1/APC/APPL1/ATP2B1/DENND4C/EIF4EBP2/EPRS1/GSK3B/HADHA/IDE/INSIG1/LYN/NUCKS1/OSBPL8/PHIP/PIK3C2A/PKM/PRKAA1/PRKDC/PTPN1/PTPN11/RAB10/RAB12/RB1/RHOQ/RPS6KB1/SLC39A14/SMARCC1/SORT1/SP1/STAT1/SYAP1/USO1/XBP1/YWHAG	36
BP	GO:0045070	positive regulation of viral genome replication	10/1199	32/18903	1.8084e-05	0.000654738	0.000537037	ADAR/CNOT7/DDX3X/HACD3/PABPC1/PDE12/PKN2/STAU1/TOP2A/TOP2B	10
BP	GO:0007029	endoplasmic reticulum organization	18/1199	93/18903	1.87817e-05	0.000671109	0.000550465	ARL6IP1/ATL3/CCDC47/EMC10/ESYT2/LMAN1/LMAN2/MMGT1/RAB10/RAB3GAP1/REEP5/RTN3/RTN4/SHTN1/TMED2/TMEM33/TOR1AIP2/TRAM1	18
BP	GO:0022406	membrane docking	18/1199	93/18903	1.87817e-05	0.000671109	0.000550465	AHCYL1/ATP2A2/BLOC1S6/CALM1/CHP1/ESYT2/EXOC4/EXOC5/EXOC8/MSN/PDZD8/RAB10/RAB12/ROCK1/SNX3/STX12/USO1/VAMP3	18
BP	GO:0032210	regulation of telomere maintenance via telomerase	13/1199	53/18903	1.95433e-05	0.000693787	0.000569067	CCT6A/CCT8/CTNNB1/DCP2/HNRNPA1/HNRNPC/HNRNPU/MAPK1/NEK7/TENT4B/TNKS/TNKS2/XRCC5	13
BP	GO:0018210	peptidyl-threonine modification	21/1199	120/18903	1.98569e-05	0.000700372	0.000574468	AKT1/APP/ATF2/CALM1/CDC42BPA/CDK1/CSNK2A1/GALNT1/GSK3B/HIPK1/HIPK2/HIPK3/MAPK1/OXSR1/PRKACA/PRKDC/ROCK1/ROCK2/TGFBR1/TNKS/UBE2K	21
BP	GO:0018107	peptidyl-threonine phosphorylation	20/1199	111/18903	1.99913e-05	0.000700594	0.00057465	AKT1/APP/ATF2/CALM1/CDC42BPA/CDK1/CSNK2A1/GSK3B/HIPK1/HIPK2/HIPK3/MAPK1/OXSR1/PRKACA/PRKDC/ROCK1/ROCK2/TGFBR1/TNKS/UBE2K	20
BP	GO:0000281	mitotic cytokinesis	17/1199	85/18903	2.03398e-05	0.000708265	0.000580942	ANLN/APC/ARF1/CFL1/CHMP2B/CHMP3/ECT2/EXOC4/EXOC5/EXOC8/PDCD6IP/RACGAP1/RHOA/ROCK1/ROCK2/SON/STMN1	17
BP	GO:1904356	regulation of telomere maintenance via telomere lengthening	14/1199	61/18903	2.13548e-05	0.000738903	0.000606072	CCT6A/CCT8/CTNNB1/DCP2/HNRNPA1/HNRNPA2B1/HNRNPC/HNRNPU/MAPK1/NEK7/TENT4B/TNKS/TNKS2/XRCC5	14
BP	GO:0035304	regulation of protein dephosphorylation	18/1199	94/18903	2.18715e-05	0.000752021	0.000616832	ARPP19/CALM1/CAMTA1/ENSA/FKBP1A/GSK3B/HSP90AB1/HSP90B1/MGAT5/PPP1R12A/PPP1R15B/PPP2R5D/PPP6R3/PTBP1/ROCK1/ROCK2/TIPRL/YWHAB	18
BP	GO:0045936	negative regulation of phosphate metabolic process	51/1199	440/18903	2.25941e-05	0.000772011	0.000633229	ADAR/AKT1/APC/ARPP19/CALM1/CBL/CHORDC1/CHP1/DNAJA1/DNAJC10/DNAJC3/ENSA/FKBP1A/GGNBP2/GNAQ/GSK3B/GSKIP/HIPK3/HMGCR/HNRNPU/IBTK/IPO7/IQGAP1/LRP6/LYN/MACROH2A1/MGAT5/NPM1/PAK2/PAQR3/PPP1R15B/PPP2CA/PRDX3/PRKAR1A/PRKAR2A/PRKDC/PRNP/PTPN1/RB1/ROCK1/ROCK2/SH3BP5/SNX6/SOCS4/SPAG9/TARDBP/TIPRL/TMED2/WARS1/YWHAB/YWHAG	51
BP	GO:0051170	import into nucleus	26/1199	169/18903	2.35458e-05	0.000794597	0.000651754	AKT1/APPL1/ATF2/CDK1/CHP1/CSE1L/E2F3/ECT2/HNRNPA1/HSP90AA1/HSP90AB1/IPO7/KPNA3/MED1/NOLC1/NUP50/NUP58/NUTF2/PPP3CA/PPP3R1/PTTG1IP/RAN/RANBP2/SUMO1/TARDBP/TNPO1	26
BP	GO:0120032	regulation of plasma membrane bounded cell projection assembly	29/1199	199/18903	2.34396e-05	0.000794597	0.000651754	ABI2/ACTR2/ACTR3/AKIRIN1/ANLN/APC/ARF6/BRK1/CDC42/CEP97/FAM98A/FMR1/FNBP1L/FSCN1/GDI2/GSK3B/HSP90AA1/MAP4/NCKAP1/PFN2/RAC1/RCC2/RDX/RHOQ/SEPTIN7/SYNE2/TGFBR1/TWF1/YAP1	29
BP	GO:0010563	negative regulation of phosphorus metabolic process	51/1199	441/18903	2.40179e-05	0.000805556	0.000660743	ADAR/AKT1/APC/ARPP19/CALM1/CBL/CHORDC1/CHP1/DNAJA1/DNAJC10/DNAJC3/ENSA/FKBP1A/GGNBP2/GNAQ/GSK3B/GSKIP/HIPK3/HMGCR/HNRNPU/IBTK/IPO7/IQGAP1/LRP6/LYN/MACROH2A1/MGAT5/NPM1/PAK2/PAQR3/PPP1R15B/PPP2CA/PRDX3/PRKAR1A/PRKAR2A/PRKDC/PRNP/PTPN1/RB1/ROCK1/ROCK2/SH3BP5/SNX6/SOCS4/SPAG9/TARDBP/TIPRL/TMED2/WARS1/YWHAB/YWHAG	51
BP	GO:0007063	regulation of sister chromatid cohesion	8/1199	21/18903	2.47311e-05	0.000814489	0.00066807	ATRX/CTCF/CTNNB1/MACROH2A1/RAD21/RB1/SLF2/TNKS	8
BP	GO:0043555	regulation of translation in response to stress	8/1199	21/18903	2.47311e-05	0.000814489	0.00066807	DDX3X/DNAJC3/EIF2AK1/EIF2S1/NPM1/PPP1R15B/RPS6KA3/TMED2	8
BP	GO:1902253	regulation of intrinsic apoptotic signaling pathway by p53 class mediator	10/1199	33/18903	2.44787e-05	0.000814489	0.00066807	EIF5A/HNRNPK/MARCHF7/MDM2/PTTG1IP/RPL11/RPS7/RRM2B/RRN3/TAF9B	10
BP	GO:0030099	myeloid cell differentiation	48/1199	407/18903	2.49973e-05	0.000818325	0.000671217	ABCB10/ABI1/ADAR/APP/ATP6AP1/B2M/CBFB/CD81/CDC42/CDC73/CDK6/CREB1/CTNNB1/CTR9/EIF2AK1/EPAS1/GABPA/GLO1/HIF1A/HIPK2/HMGB3/HOXA9/HSPA9/IREB2/KLF10/LBR/LYN/MED1/NDFIP1/NOTCH2/OSTM1/PAFAH1B1/PPP3CA/PRDX3/PRKDC/PTBP3/PTPN11/RB1/RBPJ/SFXN1/SLC25A5/SMAD5/SNX10/SP3/STAT1/TFRC/TMEM64/TMOD3	48
BP	GO:0071375	cellular response to peptide hormone stimulus	39/1199	306/18903	2.53667e-05	0.000820776	0.000673227	AHCYL1/AKT1/AP3S1/APC/APPL1/ATP2B1/DENND4C/EIF4EBP2/EPRS1/GSK3B/IDE/INSIG1/JAK1/LYN/MAP1B/NUCKS1/OSBPL8/PHIP/PIK3C2A/PKM/PRKAA1/PRKDC/PTPN1/PTPN11/RAB10/RAB12/RB1/RHOQ/ROCK1/ROCK2/RPS6KB1/SLC39A14/SMARCC1/SP1/STAT1/SYAP1/USO1/XBP1/YWHAG	39
BP	GO:0006338	chromatin remodeling	45/1199	373/18903	2.53724e-05	0.000820776	0.000673227	ACTB/ANP32E/ATF7IP/ATRX/BAZ1B/BAZ2A/CBX3/CTCF/CTR9/DDX21/DEK/DR1/H1-0/H3-3B/HDAC1/HDAC2/HLTF/HMGB1/HNRNPC/HP1BP3/INO80D/KDM5A/LMNB2/MACROH2A1/MIER1/NAP1L1/NPM1/PBRM1/PHF10/RB1/RBBP4/RBBP7/RSF1/SET/SETD7/SF3B1/SMARCA1/SMARCA5/SMARCAD1/SMARCC1/SPTY2D1/SS18/TOP1/TSPYL1/UCHL5	45
BP	GO:0016241	regulation of macroautophagy	25/1199	160/18903	2.56717e-05	0.000825571	0.00067716	AKT1/ATP6V1A/ATP6V1C1/ATP6V1D/BNIP3L/CALCOCO2/EXOC4/EXOC8/GNAI3/HIF1A/PAFAH1B2/PRKACA/RAB3GAP1/SCOC/SEC22B/SH3GLB1/SLC25A5/SMG1/SNX6/SPTLC1/UBQLN1/UBQLN2/VPS26A/VPS35/WAC	25
BP	GO:0034314	Arp2/3 complex-mediated actin nucleation	12/1199	47/18903	2.633e-05	0.000827278	0.00067856	ABI2/ACTR2/ACTR3/ARF1/ARFIP1/ARPC5/BRK1/GMFB/JMY/NCKAP1/WASF1/WASHC4	12
BP	GO:1902459	positive regulation of stem cell population maintenance	12/1199	47/18903	2.633e-05	0.000827278	0.00067856	ACTB/HDAC1/HDAC2/NCOA3/PHF10/RBBP4/RBBP7/SINHCAF/SMARCC1/SS18/SUDS3/YAP1	12
BP	GO:0046824	positive regulation of nucleocytoplasmic transport	14/1199	62/18903	2.59895e-05	0.000827278	0.00067856	CDK1/CTDSPL2/DHX9/ECT2/GSK3B/HSP90AA1/HSP90AB1/KHDRBS1/NCBP2/PPM1A/PRKACA/RAN/TARDBP/XPO4	14
BP	GO:1902373	negative regulation of mRNA catabolic process	15/1199	70/18903	2.62592e-05	0.000827278	0.00067856	CSDE1/DHX9/FMR1/HNRNPA0/HNRNPAB/HNRNPC/HNRNPU/IGF2BP3/PABPC1/SYNCRIP/TAF15/TARDBP/TENT4B/THRAP3/YBX1	15
BP	GO:0070861	regulation of protein exit from endoplasmic reticulum	9/1199	27/18903	2.66324e-05	0.000831996	0.00068243	CD81/ERLEC1/INSIG1/OS9/SAR1A/SAR1B/TMEM30A/UBE2J1/YOD1	9
BP	GO:0042594	response to starvation	30/1199	211/18903	2.76371e-05	0.000858477	0.000704151	ACADM/ATF2/BMPR2/CBL/CPEB4/DSC2/EIF2AK1/EIF2S1/FADS1/GABARAPL2/GLUL/HNRNPA1/HSPA8/JMY/KLF10/LAMP2/LARS1/MAP1LC3B/MAPK1/PRKAA1/SEH1L/SH3GLB1/SLC38A2/SP1/SREBF2/STK24/USP33/VPS41/XBP1/XPR1	30
BP	GO:0060491	regulation of cell projection assembly	29/1199	201/18903	2.83463e-05	0.000875533	0.00071814	ABI2/ACTR2/ACTR3/AKIRIN1/ANLN/APC/ARF6/BRK1/CDC42/CEP97/FAM98A/FMR1/FNBP1L/FSCN1/GDI2/GSK3B/HSP90AA1/MAP4/NCKAP1/PFN2/RAC1/RCC2/RDX/RHOQ/SEPTIN7/SYNE2/TGFBR1/TWF1/YAP1	29
BP	GO:1901796	regulation of signal transduction by p53 class mediator	19/1199	105/18903	3.00498e-05	0.000922933	0.000757019	AKT1/DDX5/EIF5A/HIPK2/HNRNPK/MARCHF7/MDM2/NPM1/PSMD10/PTTG1IP/RPL11/RPL37/RPL5/RPS20/RPS7/RRM2B/RRN3/TAF9B/ZMPSTE24	19
BP	GO:0061077	chaperone-mediated protein folding	15/1199	71/18903	3.1363e-05	0.000957885	0.000785688	CCT6A/CCT8/CHORDC1/CSNK2A1/DNAJB14/ERO1A/FKBP1A/FKBP4/FKBP5/HSPA13/HSPA8/HSPA9/HSPH1/PTGES3/ST13	15
BP	GO:0031334	positive regulation of protein-containing complex assembly	28/1199	192/18903	3.17655e-05	0.000960526	0.000787854	ARF6/BRK1/CAND1/CLASP1/CLIP1/CTTN/DDX3X/FSCN1/GSK3B/HSP90AA1/MAP1B/MAPK9/MAPRE1/MET/MSN/NCKAP1/NEK7/PFN2/RAC1/RAP1B/RHOA/RICTOR/SH3GLB1/SLF2/STMP1/SUMO1/TFRC/WARS1	28
BP	GO:0006979	response to oxidative stress	50/1199	434/18903	3.18008e-05	0.000960526	0.000787854	ADAM9/AKT1/APP/ARL6IP5/ATF2/ATP2A2/CAPN2/CDK1/CTNNB1/CYB5B/ECT2/EIF2S1/EPAS1/ERMP1/ERO1A/GCH1/GSKIP/HDAC2/HIF1A/LANCL1/MACROH2A1/MAPK1/MAPK9/MCL1/MET/OXR1/OXSR1/PLEKHA1/PPP1R15B/PPP2CB/PRDX1/PRDX3/PRDX6/PRKAA1/PRNP/PSIP1/PSMB5/RRM2B/RWDD1/SELENON/SLC25A24/SOD2/SP1/STAT1/STAU1/STK24/TP53INP1/UBE3A/UBQLN1/VKORC1L1	50
BP	GO:2001242	regulation of intrinsic apoptotic signaling pathway	26/1199	172/18903	3.21593e-05	0.000966017	0.000792358	AKT1/BCLAF1/DDX3X/DNAJA1/EIF5A/HDAC1/HIF1A/HNRNPK/MARCHF7/MCL1/MDM2/OPA1/PTPN1/PTTG1IP/RPL11/RPS7/RRM2B/RRN3/SERINC3/SKIL/SOD2/TAF9B/TMBIM6/TPT1/UBQLN1/XBP1	26
BP	GO:0035459	vesicle cargo loading	10/1199	34/18903	3.27174e-05	0.00097741	0.000801704	AP3M1/AP3S1/INSIG1/PICALM/RAB1A/SAR1A/SEC23A/SEC24A/TMED10/TMED2	10
BP	GO:1903828	negative regulation of protein localization	29/1199	203/18903	3.41668e-05	0.00101516	0.00083267	ARF6/CHP1/CLTC/CTNNA1/DNAJA1/ERLEC1/F2R/GDI2/GOPC/GSK3B/HMGCR/INSIG1/LMAN1/LYPLA1/MACROH2A1/NDFIP1/NDFIP2/OS9/PICALM/PPP3CA/PTPN11/RHOQ/ROCK2/SNX3/SUMO1/TMEM59/UBE2J1/VPS35/YOD1	29
BP	GO:0006458	'de novo' protein folding	11/1199	41/18903	3.44596e-05	0.00101833	0.000835266	DNAJB14/ERO1A/FKBP1A/HSPA13/HSPA8/HSPA9/HSPH1/PTGES3/SELENOF/ST13/UGGT1	11
BP	GO:0072331	signal transduction by p53 class mediator	26/1199	173/18903	3.56077e-05	0.0010466	0.000858454	AKT1/ATRX/CASP2/DDX5/EIF5A/HIPK1/HIPK2/HNRNPK/JMY/MARCHF7/MDM2/MYO6/NPM1/PERP/PSMD10/PTTG1IP/RPL11/RPL37/RPL5/RPS20/RPS7/RRM2B/RRN3/SHISA5/TAF9B/ZMPSTE24	26
BP	GO:0032535	regulation of cellular component size	44/1199	367/18903	3.61793e-05	0.00105771	0.000867571	ADD3/ADNP/ARF6/ARHGAP5/ARPC5/BMPR2/BRK1/CAPZA1/CAPZA2/CFL2/CHMP3/COTL1/CREB1/CTTN/DIP2B/DSTN/GSK3B/HP1BP3/HSP90AA1/HSP90AB1/LARS1/LIMA1/MAP1B/MSN/MTPN/NCKAP1/NPM1/PAFAH1B1/PFN2/PICALM/PLS1/RAB11A/RAB21/RAC1/RB1CC1/RDX/RHOA/RICTOR/RTN4/RYK/SHTN1/TMEM123/TMOD3/TWF1	44
BP	GO:0110053	regulation of actin filament organization	36/1199	278/18903	3.65077e-05	0.00106164	0.000870789	ABI2/ACTG1/ADD3/ARF1/ARF6/ARFIP1/ARPC5/BRK1/CAPZA1/CAPZA2/CDC42/CFL2/CLASP1/CLASP2/COTL1/CTTN/DSTN/GMFB/LIMA1/MET/MTPN/NCKAP1/PAK2/PFN2/RAC1/RDX/RHOA/RICTOR/ROCK1/ROCK2/STMN1/TGFBR1/TMOD3/TWF1/WASF1/WASHC4	36
BP	GO:1903649	regulation of cytoplasmic transport	9/1199	28/18903	3.70474e-05	0.0010706	0.000878143	ARFIP1/CHMP3/MAP2K1/MAPK1/MSN/MTMR2/RAB21/RDX/SNX3	9
BP	GO:1901880	negative regulation of protein depolymerization	15/1199	72/18903	3.73206e-05	0.0010706	0.000878143	ADD3/APC/ATXN7/CAMSAP2/CAPZA1/CAPZA2/CLASP1/CLASP2/LIMA1/MAP1B/MTPN/RDX/TAOK1/TMOD3/TWF1	15
BP	GO:1904375	regulation of protein localization to cell periphery	21/1199	125/18903	3.74036e-05	0.0010706	0.000878143	ACSL3/ACTB/AKT1/APPL1/ARF6/ATP2B4/ATP2C1/CLTC/DAG1/EPB41L2/GOPC/GPC4/ITGB1/KIF5B/LYPLA1/PICALM/PLS1/PRNP/RAP1A/RHOQ/TMEM59	21
BP	GO:0048524	positive regulation of viral process	14/1199	64/18903	3.79736e-05	0.00108126	0.000886883	ADAR/CNOT7/DDX3X/DHX9/FMR1/HACD3/HMGB1/PABPC1/PDE12/PKN2/RSF1/STAU1/TOP2A/TOP2B	14
BP	GO:0000723	telomere maintenance	24/1199	154/18903	3.86056e-05	0.00108792	0.000892348	ATRX/CCT6A/CCT8/CTNNB1/DCP2/HNRNPA1/HNRNPA2B1/HNRNPC/HNRNPU/HSP90AA1/HSP90AB1/INO80D/MAPK1/NEK7/PRKDC/PTGES3/SHLD2/SLF2/SMG1/TENT4B/TNKS/TNKS2/UCHL5/XRCC5	24
BP	GO:0061136	regulation of proteasomal protein catabolic process	28/1199	194/18903	3.84268e-05	0.00108792	0.000892348	AKT1/ANKIB1/FMR1/GABARAPL2/GSK3B/HSP90AB1/MAPK9/MARCHF7/MDM2/PRKACA/PSMD10/RAD23B/RNF14/RPL11/RYBP/SMARCC1/SOCS4/SUMO1/SUMO2/TMF1/TMTC3/UBE2K/UBQLN1/UBQLN2/UCHL5/WAC/XPO1/ZYG11B	28
BP	GO:0016311	dephosphorylation	43/1199	357/18903	3.95827e-05	0.00110974	0.000910243	ACP1/ARPP19/BPNT2/CALM1/CAMTA1/CHP1/CTDSPL2/ENSA/FBXW11/FKBP1A/GSK3B/HSP90AB1/HSP90B1/IQGAP1/MGAT5/MTMR2/PPM1A/PPP1CB/PPP1R12A/PPP1R15B/PPP2CA/PPP2CB/PPP2R1B/PPP2R5C/PPP2R5D/PPP3CA/PPP3R1/PPP4R2/PPP4R3B/PPP6C/PPP6R3/PPTC7/PTBP1/PTP4A2/PTPN1/PTPN11/RNGTT/ROCK1/ROCK2/RPRD1A/SACM1L/TIPRL/YWHAB	43
BP	GO:0072332	intrinsic apoptotic signaling pathway by p53 class mediator	16/1199	81/18903	4.15105e-05	0.00115399	0.000946543	DDX5/EIF5A/HIPK1/HIPK2/HNRNPK/JMY/MARCHF7/MDM2/PERP/PTTG1IP/RPL11/RPS7/RRM2B/RRN3/SHISA5/TAF9B	16
BP	GO:0017148	negative regulation of translation	34/1199	258/18903	4.15835e-05	0.00115399	0.000946543	AGO1/AGO2/CALR/CAPRIN1/CNOT1/CNOT6/CNOT7/CPEB4/CSDE1/DCP2/DDX3X/DHX9/EIF2AK1/EIF2S1/EIF4EBP2/EPRS1/FMR1/HNRNPU/IGF2BP3/IREB2/LSM14A/PABPC1/PATL1/PDE12/PURA/RC3H2/ROCK1/ROCK2/SAMD4B/SYNCRIP/TARDBP/TENT4B/YBX1/YTHDF3	34
BP	GO:0090435	protein localization to nuclear envelope	6/1199	12/18903	4.26359e-05	0.00117722	0.000965597	LMNB2/NUTF2/OSBPL8/SUMO1/TOR1AIP1/TOR1AIP2	6
BP	GO:0006606	protein import into nucleus	25/1199	165/18903	4.35233e-05	0.00119569	0.000980742	AKT1/APPL1/ATF2/CDK1/CHP1/CSE1L/E2F3/ECT2/HSP90AA1/HSP90AB1/IPO7/KPNA3/MED1/NOLC1/NUP50/NUP58/NUTF2/PPP3CA/PPP3R1/PTTG1IP/RAN/RANBP2/SUMO1/TARDBP/TNPO1	25
BP	GO:0010591	regulation of lamellipodium assembly	11/1199	42/18903	4.40311e-05	0.00120359	0.000987224	ABI2/ACTR2/ACTR3/AKIRIN1/BRK1/CDC42/FSCN1/HSP90AA1/NCKAP1/RAC1/TWF1	11
BP	GO:0035196	miRNA processing	13/1199	57/18903	4.48694e-05	0.0012204	0.00100101	ADAR/AGO1/AGO2/DDX3X/DDX5/DICER1/HNRNPA2B1/MAP2K1/NCBP2/PPP3CA/PUM2/TRUB1/ZMPSTE24	13
BP	GO:0051098	regulation of binding	44/1199	372/18903	5.00607e-05	0.00135486	0.0011113	ACTB/ADNP/AKT1/AMFR/APP/ATP2A2/B2M/BTBD1/C4orf3/CALM1/CDC42/CTNNB1/DAZAP2/DHX9/EIF2S1/FKBP1A/FMR1/GSK3B/H1-0/HDAC2/HIPK2/HMGB1/HSP90AB1/IDE/MAPRE1/MET/NMD3/NUCKS1/PPP2CA/PPP2CB/PPP3CA/PRKACA/RAN/RB1/ROCK1/RPL11/RSF1/STMN1/SUMO1/TGFBR1/TMBIM6/TNKS/USP33/ZMPSTE24	44
BP	GO:0034101	erythrocyte homeostasis	22/1199	137/18903	5.03275e-05	0.00135537	0.00111172	ABCB10/ADAR/B2M/CDK6/EPAS1/HIF1A/HIPK2/HSPA9/IREB2/LYN/MED1/PRDX1/PRKDC/PTBP3/RB1/RPS24/SFXN1/SLC25A5/SMAD5/SP3/STAT1/TMOD3	22
BP	GO:0106027	neuron projection organization	17/1199	91/18903	5.10405e-05	0.00136783	0.00112194	ABI2/ACTR2/APP/ARF1/CAPRIN1/CDC42/CFL1/CTTN/GSK3B/HOMER1/MTMR2/PAFAH1B1/PDLIM5/PLS1/PRNP/UBE3A/VPS35	17
BP	GO:0051099	positive regulation of binding	26/1199	177/18903	5.29872e-05	0.00141308	0.00115905	AMFR/APP/B2M/CALM1/CTNNB1/DAZAP2/DHX9/EIF2S1/FKBP1A/FMR1/GSK3B/H1-0/HIPK2/HMGB1/HSP90AB1/IDE/MAPRE1/MET/NMD3/PPP2CA/PPP2CB/RAN/RB1/RPL11/STMN1/USP33	26
BP	GO:0031124	mRNA 3'-end processing	13/1199	58/18903	5.45085e-05	0.00144659	0.00118654	AHCYL1/APP/CDC73/GRSF1/NCBP2/NUDT21/PABPC1/PAPOLA/RPRD1A/SLBP/TENT4B/VIRMA/ZC3H14	13
BP	GO:0030100	regulation of endocytosis	29/1199	209/18903	5.86958e-05	0.00155019	0.00127152	APPL1/ARF1/ARF6/ATAD1/B2M/BMP2K/CBL/CD2AP/CDC42/FMR1/HNRNPK/MIB1/MKLN1/MTMR2/PACSIN2/PICALM/PPP3CA/PPP3R1/PPT1/PTPN1/RAB21/RAB4A/RAB5B/RAC1/ROCK1/SCYL2/SYNJ2BP/UBQLN2/ZFYVE16	29
BP	GO:2001243	negative regulation of intrinsic apoptotic signaling pathway	18/1199	101/18903	5.94464e-05	0.00156247	0.00128159	AKT1/DDX3X/DNAJA1/HDAC1/HIF1A/MARCHF7/MCL1/MDM2/OPA1/PTPN1/PTTG1IP/RRM2B/RRN3/SOD2/TAF9B/TMBIM6/TPT1/XBP1	18
BP	GO:0031669	cellular response to nutrient levels	31/1199	231/18903	6.32032e-05	0.00165326	0.00135606	ATF2/ATP2B1/BMPR2/CBL/CPEB4/DSC2/EIF2S1/FADS1/GABARAPL2/GLUL/HNRNPA1/HSPA8/JMY/KLF10/LAMP2/LARS1/MAP1LC3B/MAPK1/MED1/PRKAA1/RICTOR/SEH1L/SH3GLB1/SLC38A2/SP1/SREBF2/STK24/USP33/VPS41/XBP1/XPR1	31
BP	GO:0006903	vesicle targeting	14/1199	67/18903	6.49726e-05	0.00169145	0.00138738	CLASP1/CLASP2/EXOC4/EXOC5/EXOC8/FAM91A1/PPP6C/SAR1A/SAR1B/SNAP23/STARD3NL/TBC1D23/TMED10/TMED2	14
BP	GO:0120034	positive regulation of plasma membrane bounded cell projection assembly	19/1199	111/18903	6.64445e-05	0.00172157	0.00141209	ABI2/ACTR2/ACTR3/AKIRIN1/ANLN/APC/BRK1/CDC42/FAM98A/FMR1/FNBP1L/FSCN1/GSK3B/HSP90AA1/NCKAP1/RAC1/RHOQ/SEPTIN7/TGFBR1	19
BP	GO:0002474	antigen processing and presentation of peptide antigen via MHC class I	9/1199	30/18903	6.83857e-05	0.00176351	0.00144649	B2M/CALR/HLA-A/HLA-B/HLA-C/IDE/LNPEP/PDIA3/SAR1B	9
BP	GO:0006991	response to sterol depletion	7/1199	18/18903	6.9448e-05	0.00176592	0.00144846	AMFR/ERLIN2/INSIG1/LYN/SPRING1/SREBF2/TMED2	7
BP	GO:0019081	viral translation	7/1199	18/18903	6.9448e-05	0.00176592	0.00144846	CSDE1/DENR/DHX9/EIF3A/EIF3L/PTBP1/SSB	7
BP	GO:0071786	endoplasmic reticulum tubular network organization	7/1199	18/18903	6.9448e-05	0.00176592	0.00144846	ARL6IP1/ATL3/RAB10/RAB3GAP1/RTN3/RTN4/TMEM33	7
BP	GO:0030010	establishment of cell polarity	23/1199	150/18903	7.18374e-05	0.00181822	0.00149136	ARF6/CDC42/CLASP1/FBXW11/FSCN1/GOLPH3/GSK3B/HSP90AA1/HSP90AB1/ITGB1/MAP1B/MAP4/MAPRE1/MSN/PAFAH1B1/RAB10/RAB11FIP2/RAP1B/RHOA/RICTOR/ROCK1/ROCK2/SHTN1	23
BP	GO:0051084	'de novo' post-translational protein folding	10/1199	37/18903	7.30015e-05	0.00182237	0.00149477	DNAJB14/ERO1A/HSPA13/HSPA8/HSPA9/HSPH1/PTGES3/SELENOF/ST13/UGGT1	10
BP	GO:1902745	positive regulation of lamellipodium organization	10/1199	37/18903	7.30015e-05	0.00182237	0.00149477	ABI2/ACTR2/ACTR3/AKIRIN1/BRK1/CDC42/FSCN1/HSP90AA1/NCKAP1/RAC1	10
BP	GO:1904358	positive regulation of telomere maintenance via telomere lengthening	10/1199	37/18903	7.30015e-05	0.00182237	0.00149477	CCT6A/CCT8/CTNNB1/HNRNPA1/HNRNPA2B1/MAPK1/NEK7/TNKS/TNKS2/XRCC5	10
BP	GO:0036010	protein localization to endosome	8/1199	24/18903	7.53264e-05	0.00187186	0.00153536	AKAP11/ARF6/MSN/PACSIN2/RDX/ROCK2/TMEM30A/VPS35	8
BP	GO:0061462	protein localization to lysosome	12/1199	52/18903	7.74689e-05	0.00191639	0.00157189	AP3M1/CD81/GNPTAB/HSPA8/LAMP2/MFSD1/NCOA4/ROCK2/RTN4/SCARB2/SORT1/ZFYVE16	12
BP	GO:0032434	regulation of proteasomal ubiquitin-dependent protein catabolic process	22/1199	141/18903	7.84636e-05	0.00193226	0.0015849	AKT1/ANKIB1/GSK3B/HSP90AB1/MAPK9/MDM2/PSMD10/RAD23B/RNF14/RPL11/RYBP/SMARCC1/SOCS4/SUMO1/SUMO2/UBE2K/UBQLN1/UBQLN2/UCHL5/WAC/XPO1/ZYG11B	22
BP	GO:0006893	Golgi to plasma membrane transport	13/1199	60/18903	7.92938e-05	0.00194394	0.00159448	ACSL3/ARFGEF2/ATP2C1/EXOC4/EXOC5/EXOC8/GOLPH3/GOPC/LYPLA1/PREPL/RAB10/RABEP1/VAMP3	13
BP	GO:0044089	positive regulation of cellular component biogenesis	54/1199	498/18903	8.15221e-05	0.00198965	0.00163197	ABI2/ACTR2/ACTR3/ADNP/AKIRIN1/ANLN/APC/ARF6/ATF7IP/BRK1/CAND1/CDC42/CLASP1/CLASP2/CLIP1/CNOT1/CNOT6/CTTN/DAG1/DDX3X/FAM98A/FMR1/FNBP1L/FSCN1/G3BP1/G3BP2/GSK3B/HSP90AA1/LIMS1/MAP1B/MAPK9/MAPRE1/MET/MSN/NCKAP1/NEK7/PDCD6IP/PFN2/RAB3GAP1/RAC1/RAP1B/RHOA/RHOQ/RICTOR/ROCK1/ROCK2/SEPTIN7/SH3GLB1/SLF2/STMP1/SUMO1/TFRC/TGFBR1/WARS1	54
BP	GO:0002064	epithelial cell development	29/1199	213/18903	8.2914e-05	0.00201463	0.00165246	ABI2/AKT1/ATRX/C1GALT1/CDK6/CLIC4/CLOCK/EPAS1/FEM1B/FNDC3A/FRS2/GSK3B/HIF1A/IL6ST/IQGAP1/MET/MSN/NOTCH2/PALLD/RAP1A/RAP1B/RAP2C/RDX/ROCK1/ROCK2/VCL/VEZF1/YAP1/YIPF6	29
BP	GO:0007034	vacuolar transport	24/1199	162/18903	8.83075e-05	0.00213514	0.00175131	AP3M1/AP3S1/ARL8B/CHMP2B/CHMP3/GNPTAB/HOOK1/HSPA8/LAMP1/LAMP2/NCOA4/NDFIP1/NDFIP2/PSAP/RAB12/SCARB2/SCYL2/SORT1/TMEM50A/VPS35/VPS36/VPS41/VTA1/ZFYVE16	24
BP	GO:0034655	nucleobase-containing compound catabolic process	48/1199	428/18903	8.8655e-05	0.00213514	0.00175131	AGO1/AGO2/AKT1/CASC3/CNOT1/CNOT6/CNOT7/CSDE1/DCP2/DDX5/DHX9/DICER1/ENPP4/FMR1/GRSF1/GSPT1/HNRNPA0/HNRNPAB/HNRNPC/HNRNPU/IGF2BP3/MTREX/NCBP2/NPM1/PABPC1/PATL1/PDE12/PUM2/RBM8A/RC3H2/ROCK1/ROCK2/SAMD4B/SAMHD1/SERBP1/SMG1/SSB/SUCLA2/SYNCRIP/TAF15/TARDBP/TENT4B/THRAP3/WDR82/YBX1/YTHDF3/ZC3H14/ZC3HAV1	48
BP	GO:0006898	receptor-mediated endocytosis	33/1199	257/18903	8.9469e-05	0.00214529	0.00175964	AP1S1/AP2B1/ARF1/ARF6/ATAD1/B2M/BMP2K/CANX/CBL/CD2AP/CD81/CLTC/CTTN/EPS15/FMR1/FNBP1L/HNRNPK/ITGB1/LRP6/MKLN1/MTMR2/PICALM/PIKFYVE/PPP3R1/PPT1/RAB21/RAC1/SCARB2/SCYL2/SNX1/TFRC/UBQLN2/WASF1	33
BP	GO:0006890	retrograde vesicle-mediated transport, Golgi to endoplasmic reticulum	12/1199	53/18903	9.44227e-05	0.00224799	0.00184388	ARCN1/ARF3/ARF4/COPA/COPB2/GOLPH3/KDELR1/LMAN2/PITPNB/RAB6A/SEC22B/TMED10	12
BP	GO:0048255	mRNA stabilization	13/1199	61/18903	9.49856e-05	0.00224799	0.00184388	CSDE1/DHX9/HNRNPA0/HNRNPC/HNRNPU/IGF2BP3/PABPC1/SYNCRIP/TAF15/TARDBP/TENT4B/THRAP3/YBX1	13
BP	GO:0035303	regulation of dephosphorylation	21/1199	133/18903	9.4971e-05	0.00224799	0.00184388	ARPP19/CALM1/CAMTA1/CHP1/ENSA/FKBP1A/GSK3B/HSP90AB1/HSP90B1/IQGAP1/MGAT5/MTMR2/PPP1R12A/PPP1R15B/PPP2R5D/PPP6R3/PTBP1/ROCK1/ROCK2/TIPRL/YWHAB	21
BP	GO:0055076	transition metal ion homeostasis	22/1199	143/18903	9.72083e-05	0.00229068	0.00187889	APP/ARF1/ATP6AP1/ATP6V1A/B2M/EIF2AK1/EPAS1/FTH1/HIF1A/IREB2/NCOA4/NDFIP1/PICALM/PRNP/SLC30A1/SLC30A7/SLC30A9/SLC31A1/SLC39A14/SOD2/TFRC/XIAP	22
BP	GO:0072665	protein localization to vacuole	15/1199	78/18903	9.86494e-05	0.00231466	0.00189856	AP3M1/CD81/GNPTAB/HSPA8/LAMP2/MFSD1/NCOA4/ROCK2/RTN4/SCARB2/SH3GLB1/SORT1/VPS36/VPS41/ZFYVE16	15
BP	GO:0006469	negative regulation of protein kinase activity	29/1199	216/18903	0.000106612	0.00249081	0.00204305	ADAR/AKT1/APC/CBL/CHORDC1/CHP1/DNAJA1/GGNBP2/GNAQ/GSKIP/HIPK3/HMGCR/IBTK/IPO7/LRP6/LYN/MACROH2A1/NPM1/PAK2/PAQR3/PRKAR1A/PRKAR2A/PTPN1/RB1/SH3BP5/SNX6/SOCS4/WARS1/YWHAG	29
BP	GO:1990090	cellular response to nerve growth factor stimulus	11/1199	46/18903	0.000108598	0.0025264	0.00207224	ACAP2/AKT1/APP/ARF6/CBL/DYNC1LI2/KIDINS220/RAP1A/SORT1/UBE3A/WASF1	11
BP	GO:1901653	cellular response to peptide	43/1199	373/18903	0.000109455	0.00253556	0.00207975	AHCYL1/AKT1/AP3S1/APC/APP/APPL1/ATP2B1/DENND4C/EIF4EBP2/EPRS1/GSK3B/IDE/INSIG1/JAK1/LYN/MAP1B/MDM2/NUCKS1/OSBPL8/PHIP/PIK3C2A/PKM/PRKAA1/PRKDC/PRNP/PTPN1/PTPN11/RAB10/RAB12/RB1/RHOQ/ROCK1/ROCK2/RPS6KB1/SLC39A14/SMARCC1/SNX6/SP1/STAT1/SYAP1/USO1/XBP1/YWHAG	43
BP	GO:2001252	positive regulation of chromosome organization	18/1199	106/18903	0.000113857	0.0026264	0.00215426	ATF7IP/ATRX/CCT6A/CCT8/CTNNB1/HNRNPA1/HNRNPA2B1/INO80D/MACROH2A1/MAPK1/NEK7/RAD21/SLF2/SMC4/TNKS/TNKS2/UCHL5/XRCC5	18
BP	GO:0071496	cellular response to external stimulus	39/1199	328/18903	0.000117269	0.00269374	0.0022095	ADNP/ATF2/ATP2B1/BMPR2/CASP2/CBL/CPEB4/DAG1/DSC2/EIF2S1/FADS1/GABARAPL2/GLUL/HNRNPA1/HSPA8/JMY/KLF10/LAMP2/LARS1/LYN/MAP1LC3B/MAP2K4/MAP3K2/MAPK1/MED1/MTPN/PRKAA1/RICTOR/SEH1L/SH3GLB1/SLC38A2/SP1/SREBF2/STK24/TNFRSF10B/USP33/VPS41/XBP1/XPR1	39
BP	GO:0006378	mRNA polyadenylation	10/1199	39/18903	0.000118633	0.00269641	0.00221168	AHCYL1/APP/CDC73/GRSF1/NUDT21/PABPC1/PAPOLA/TENT4B/VIRMA/ZC3H14	10
BP	GO:1900180	regulation of protein localization to nucleus	21/1199	135/18903	0.000118177	0.00269641	0.00221168	AKT1/CCT6A/CCT8/CD2AP/CDK1/CHP1/CTNNA1/ECT2/GLUL/GSK3B/HSP90AA1/HSP90AB1/NMD3/NOLC1/NPM1/NUP58/RAN/SUMO1/TARDBP/TFRC/YAP1	21
BP	GO:2000113	negative regulation of cellular macromolecule biosynthetic process	35/1199	283/18903	0.000118865	0.00269641	0.00221168	AGO1/AGO2/CALR/CAPRIN1/CNOT1/CNOT6/CNOT7/CPEB4/CSDE1/DCP2/DDX3X/DHX9/EIF2AK1/EIF2S1/EIF4EBP2/EPRS1/FMR1/GSK3B/HNRNPU/IGF2BP3/IREB2/LSM14A/PABPC1/PATL1/PDE12/PURA/RC3H2/ROCK1/ROCK2/SAMD4B/SYNCRIP/TARDBP/TENT4B/YBX1/YTHDF3	35
BP	GO:0000819	sister chromatid segregation	31/1199	239/18903	0.00011982	0.00270684	0.00222023	ACTB/APC/ATRX/BAZ1B/CDC27/CHMP2B/CHMP3/CTCF/CTNNB1/HNRNPU/MACROH2A1/MAPRE1/NAA50/PBRM1/PDS5A/PHF10/RAB11A/RACGAP1/RAD21/RAN/RB1/SEH1L/SLF2/SMARCA5/SMARCC1/SMC1A/SMC4/STAG2/TNKS/TOP2A/TOP2B	31
BP	GO:1902115	regulation of organelle assembly	28/1199	207/18903	0.000122228	0.00274988	0.00225554	CCSAP/CEP97/CHMP2B/CHMP3/CNOT1/CNOT6/FSCN1/G3BP1/G3BP2/GDI2/GSK3B/HNRNPU/MAP4/MAPK9/MSN/NPM1/PDCD6IP/PIKFYVE/PRKAA1/RAB3GAP1/RDX/RHOA/SEC22B/SEPTIN7/SH3GLB1/SYNE2/UBQLN2/YAP1	28
BP	GO:0006596	polyamine biosynthetic process	6/1199	14/18903	0.000124085	0.00275761	0.00226188	AMD1/AZIN1/OAZ1/OAZ2/ODC1/SMS	6
BP	GO:0032486	Rap protein signal transduction	6/1199	14/18903	0.000124085	0.00275761	0.00226188	CBL/RAP1A/RAP1B/RAP2A/RAP2C/RDX	6
BP	GO:0043558	regulation of translational initiation in response to stress	6/1199	14/18903	0.000124085	0.00275761	0.00226188	DNAJC3/EIF2AK1/EIF2S1/NPM1/PPP1R15B/TMED2	6
BP	GO:0033673	negative regulation of kinase activity	31/1199	240/18903	0.000129427	0.00286191	0.00234743	ADAR/AKT1/APC/CBL/CHORDC1/CHP1/DNAJA1/GGNBP2/GNAQ/GSKIP/HIPK3/HMGCR/HNRNPU/IBTK/IPO7/LRP6/LYN/MACROH2A1/NPM1/PAK2/PAQR3/PRDX3/PRKAR1A/PRKAR2A/PTPN1/RB1/SH3BP5/SNX6/SOCS4/WARS1/YWHAG	31
BP	GO:0031668	cellular response to extracellular stimulus	33/1199	262/18903	0.000129825	0.00286191	0.00234743	ADNP/ATF2/ATP2B1/BMPR2/CBL/CPEB4/DSC2/EIF2S1/FADS1/GABARAPL2/GLUL/HNRNPA1/HSPA8/JMY/KLF10/LAMP2/LARS1/LYN/MAP1LC3B/MAPK1/MED1/PRKAA1/RICTOR/SEH1L/SH3GLB1/SLC38A2/SP1/SREBF2/STK24/USP33/VPS41/XBP1/XPR1	33
BP	GO:0044403	biological process involved in symbiotic interaction	37/1199	307/18903	0.000131661	0.00289072	0.00237106	ARL8B/BSG/CBL/CCNT1/CD46/CD81/CDC42/CDK1/CFL1/CHMP2B/CHMP3/CTSB/DAG1/EPS15/FMR1/HDAC1/HMGB1/HSP90AB1/HSPA8/IDE/ITCH/ITGB1/KPNA3/LAMP1/NUCKS1/PIKFYVE/ROCK2/RPSA/SCARB2/SNX3/SP1/TARDBP/TFRC/THOC2/TMEM41B/XPR1/ZDHHC9	37
BP	GO:0051972	regulation of telomerase activity	11/1199	47/18903	0.000133735	0.00290131	0.00237975	CTNNB1/HNRNPA2B1/HSP90AA1/HSP90AB1/MAPK1/NEK7/PARM1/PARP4/PTGES3/TNKS/XRCC5	11
BP	GO:0007040	lysosome organization	17/1199	98/18903	0.000133467	0.00290131	0.00237975	ARL8B/ATP6AP1/ATP6AP2/ATP6V1A/ATP6V1D/CHMP2B/CHMP3/GNPTAB/HOOK1/LAPTM4B/MBTPS1/PIKFYVE/PPT1/RAB14/SCARB2/TPP1/VPS35	17
BP	GO:0080171	lytic vacuole organization	17/1199	98/18903	0.000133467	0.00290131	0.00237975	ARL8B/ATP6AP1/ATP6AP2/ATP6V1A/ATP6V1D/CHMP2B/CHMP3/GNPTAB/HOOK1/LAPTM4B/MBTPS1/PIKFYVE/PPT1/RAB14/SCARB2/TPP1/VPS35	17
BP	GO:0032886	regulation of microtubule-based process	32/1199	252/18903	0.000140077	0.00302688	0.00248274	APC/ATXN7/CAMSAP2/CCSAP/CEP97/CHMP2B/CHMP3/CHORDC1/CLASP1/CLASP2/CLIP1/CLTC/FKBP4/GSK3B/HNRNPU/KLHL42/LAMP1/MAP1B/MAPRE1/MET/NPM1/PAFAH1B1/PDCD6IP/PRKAA1/RAC1/RHOA/ROCK1/ROCK2/SKA2/STMN1/TAOK1/XPO1	32
BP	GO:0007064	mitotic sister chromatid cohesion	8/1199	26/18903	0.00014279	0.00307335	0.00252086	ATRX/MACROH2A1/NAA50/PDS5A/RB1/SLF2/SMC1A/TNKS	8
BP	GO:0099111	microtubule-based transport	28/1199	209/18903	0.000144358	0.00309492	0.00253856	AP3M1/AP3S1/APP/ARL8B/BLOC1S6/CDC42/FBXW11/HIF1A/HNRNPU/HSBP1/HSPA8/KIF1B/KIF3A/KIF5B/LAMP1/MAP1B/OPA1/PAFAH1B1/PURA/RAB1A/RAB21/RAB6A/RHOT1/SSX2IP/STAU1/SUN1/SYNE2/WASF1	28
BP	GO:0090316	positive regulation of intracellular protein transport	23/1199	157/18903	0.000145809	0.00311382	0.00255405	CD81/CDK1/CHP1/CTDSPL2/ECT2/GSK3B/HSP90AA1/HSP90AB1/NPEPPS/OAZ1/OAZ2/PPM1A/PRKAA1/PRKACA/PRNP/RAN/SAR1A/SAR1B/SH3GLB1/SREBF2/TARDBP/TMEM30A/XPO4	23
BP	GO:0044772	mitotic cell cycle phase transition	51/1199	473/18903	0.000146429	0.00311489	0.00255494	ACTB/AKT1/ANLN/APC/APP/APPL1/ARPP19/BACH1/CACUL1/CALM1/CASP2/CCND1/CCNG1/CCNI/CCNJ/CCNY/CDC27/CDC73/CDK1/CDK6/CLASP1/CLASP2/CUL4B/CUL5/DDX3X/E2F3/ENSA/FHL1/GSPT1/ITGB1/KHDRBS1/MDM2/PBRM1/PHF10/PPP2CA/PPP3CA/PPP6C/PRKDC/RAB11A/RAD21/RB1/RCC2/RDX/RPS6KB1/RRM2B/SMARCC1/TAOK1/TFDP1/TMOD3/TOPBP1/WAC	51
BP	GO:0002183	cytoplasmic translational initiation	10/1199	40/18903	0.000149265	0.00315071	0.00258431	DENR/EIF2S3/EIF3A/EIF3J/EIF3L/EIF4A2/EIF4B/EIF4H/NCBP2/SLBP	10
BP	GO:0031111	negative regulation of microtubule polymerization or depolymerization	10/1199	40/18903	0.000149265	0.00315071	0.00258431	APC/ATXN7/CAMSAP2/CLASP1/CLASP2/FKBP4/MAP1B/MAPRE1/STMN1/TAOK1	10
BP	GO:0016570	histone modification	51/1199	474/18903	0.000154263	0.00324367	0.00266057	ACTB/ASH1L/ATF2/ATRX/ATXN7/BAZ1B/BAZ2A/BMI1/CDC73/CLOCK/CTCF/CTNNB1/CTR9/CUL4B/DDX21/DEK/DR1/ELK4/HDAC1/HDAC2/KDM5A/KDM7A/MACROH2A1/MIER1/MORF4L1/MORF4L2/NAA50/NCOA3/NSD2/PCGF3/PCGF5/PHF20/RBBP4/RBBP7/RYBP/SET/SETD7/SF3B1/SKP1/SMARCA5/SMARCAD1/SUDS3/SUZ12/TBL1XR1/TRIP12/UBE2A/UBE2N/WAC/WDR82/ZMPSTE24/ZNF451	51
BP	GO:0098930	axonal transport	13/1199	64/18903	0.00015918	0.00333425	0.00273486	AP3M1/AP3S1/ARL8B/BLOC1S6/FBXW11/HIF1A/HSBP1/KIF1B/KIF3A/KIF5B/OPA1/PAFAH1B1/RAB21	13
BP	GO:0032527	protein exit from endoplasmic reticulum	11/1199	48/18903	0.000163655	0.00338901	0.00277978	CD81/ERLEC1/HSP90B1/INSIG1/OS9/SAR1A/SAR1B/SEL1L/TMEM30A/UBE2J1/YOD1	11
BP	GO:0035305	negative regulation of dephosphorylation	11/1199	48/18903	0.000163655	0.00338901	0.00277978	ARPP19/CHP1/ENSA/FKBP1A/GSK3B/IQGAP1/MGAT5/ROCK1/ROCK2/TIPRL/YWHAB	11
BP	GO:1990089	response to nerve growth factor	11/1199	48/18903	0.000163655	0.00338901	0.00277978	ACAP2/AKT1/APP/ARF6/CBL/DYNC1LI2/KIDINS220/RAP1A/SORT1/UBE3A/WASF1	11
BP	GO:0030032	lamellipodium assembly	14/1199	73/18903	0.000171947	0.0035273	0.0028932	ABI2/ACTR2/ACTR3/AKIRIN1/BRK1/CDC42/FSCN1/GOLPH3/HSP90AA1/ITGB1/NCKAP1/RAC1/TWF1/VCL	14
BP	GO:0002262	myeloid cell homeostasis	24/1199	169/18903	0.000172268	0.0035273	0.0028932	ABCB10/ADAR/B2M/CDK6/EPAS1/HIF1A/HIPK2/HMGB1/HSPA9/IREB2/LIPA/LYN/MED1/PRDX1/PRKDC/PTBP3/RB1/RPS24/SFXN1/SLC25A5/SMAD5/SP3/STAT1/TMOD3	24
BP	GO:1902904	negative regulation of supramolecular fiber organization	24/1199	169/18903	0.000172268	0.0035273	0.0028932	ADD3/APC/ATXN7/CAMSAP2/CAPZA1/CAPZA2/CLASP1/CLASP2/FKBP4/GMFB/HSPA8/LIMA1/MAP1B/MAPRE1/MET/MTPN/PAK2/PFN2/RDX/STMN1/TAOK1/TMOD3/TWF1/VBP1	24
BP	GO:0043242	negative regulation of protein-containing complex disassembly	15/1199	82/18903	0.000177416	0.00357909	0.00293568	ADD3/APC/ATXN7/CAMSAP2/CAPZA1/CAPZA2/CLASP1/CLASP2/LIMA1/MAP1B/MTPN/RDX/TAOK1/TMOD3/TWF1	15
BP	GO:1902369	negative regulation of RNA catabolic process	15/1199	82/18903	0.000177416	0.00357909	0.00293568	CSDE1/DHX9/FMR1/HNRNPA0/HNRNPAB/HNRNPC/HNRNPU/IGF2BP3/PABPC1/SYNCRIP/TAF15/TARDBP/TENT4B/THRAP3/YBX1	15
BP	GO:0030901	midbrain development	16/1199	91/18903	0.000177026	0.00357909	0.00293568	ACTB/ATP5PB/CALM1/CDC42/CTNNB1/GLUD1/KDM7A/LRP6/RHOA/RYK/SOS1/SUDS3/UCHL5/WLS/YWHAQ/ZNF148	16
BP	GO:0070828	heterochromatin organization	16/1199	91/18903	0.000177026	0.00357909	0.00293568	ATF7IP/BAZ2A/CBX3/CTCF/CTR9/H1-0/H3-3B/HDAC1/HDAC2/HMGB1/HP1BP3/LMNB2/RB1/SETD7/SMARCA5/SPTY2D1	16
BP	GO:0043631	RNA polyadenylation	10/1199	41/18903	0.0001863	0.00374448	0.00307135	AHCYL1/APP/CDC73/GRSF1/NUDT21/PABPC1/PAPOLA/TENT4B/VIRMA/ZC3H14	10
BP	GO:0016126	sterol biosynthetic process	13/1199	65/18903	0.000187574	0.0037563	0.00308104	CYB5R3/ERG28/ERLIN2/HMGCR/HMGCS1/IDI1/INSIG1/LBR/MBTPS1/MBTPS2/MSMO1/PRKAA1/SC5D	13
BP	GO:0010998	regulation of translational initiation by eIF2 alpha phosphorylation	5/1199	10/18903	0.000196053	0.0038834	0.00318529	DNAJC3/EIF2AK1/NPM1/PPP1R15B/TMED2	5
BP	GO:0070862	negative regulation of protein exit from endoplasmic reticulum	5/1199	10/18903	0.000196053	0.0038834	0.00318529	ERLEC1/INSIG1/OS9/UBE2J1/YOD1	5
BP	GO:0032933	SREBP signaling pathway	6/1199	15/18903	0.000195724	0.0038834	0.00318529	AMFR/ERLIN2/INSIG1/SPRING1/SREBF2/TMED2	6
BP	GO:0032212	positive regulation of telomere maintenance via telomerase	9/1199	34/18903	0.000199186	0.00390241	0.00320088	CCT6A/CCT8/CTNNB1/HNRNPA1/MAPK1/NEK7/TNKS/TNKS2/XRCC5	9
BP	GO:0035308	negative regulation of protein dephosphorylation	9/1199	34/18903	0.000199186	0.00390241	0.00320088	ARPP19/ENSA/FKBP1A/GSK3B/MGAT5/ROCK1/ROCK2/TIPRL/YWHAB	9
BP	GO:0051973	positive regulation of telomerase activity	9/1199	34/18903	0.000199186	0.00390241	0.00320088	CTNNB1/HSP90AA1/HSP90AB1/MAPK1/NEK7/PARM1/PTGES3/TNKS/XRCC5	9
BP	GO:2000573	positive regulation of DNA biosynthetic process	14/1199	74/18903	0.000199867	0.00390241	0.00320088	CCT6A/CCT8/CTNNB1/HNRNPA1/HSP90AA1/HSP90AB1/MAPK1/NEK7/PARM1/PTGES3/TNKS/TNKS2/USP1/XRCC5	14
BP	GO:0060996	dendritic spine development	16/1199	92/18903	0.000201881	0.00392771	0.00322163	ABI2/ACTR2/ARF4/ARF6/C21orf91/CAPRIN1/CDC42/CFL1/FMR1/HDAC2/MAPK6/PAFAH1B1/PAK2/PDLIM5/UBA6/UBE3A	16
BP	GO:0150105	protein localization to cell-cell junction	7/1199	21/18903	0.000214431	0.00415707	0.00340976	ACTB/ACTG1/DSP/JAK1/MAPK9/PAK2/VCL	7
BP	GO:0050821	protein stabilization	28/1199	214/18903	0.000216093	0.00417449	0.00342405	ATF7IP/ATP1B3/CALR/CCT6A/CCT8/CHP1/CREB1/GNAQ/HSP90AA1/HSP90AB1/LAMP1/LAMP2/MARCHF7/MFSD1/NPM1/PFN2/PTGES3/RAB21/RPL11/RPL5/RPS7/RTN4/SEL1L/STX12/SUMO1/TAF9B/USP33/VBP1	28
BP	GO:0016049	cell growth	52/1199	493/18903	0.00021852	0.00420651	0.00345031	ADNP/AKT1/ALCAM/APP/BMPR2/CDC42/CDC73/CSNK2A1/CTNNB1/CTTN/DCBLD2/DDX3X/DIP2B/EIF4G2/FHL1/GSK3B/H3-3B/HSP90AA1/HSP90AB1/IQGAP1/ITCH/ITGB1/MAP1B/MAP2K4/MEX3C/MTPN/NIN/NPM1/OSGIN2/PAFAH1B1/PDLIM5/PPP2CA/PPT1/PSMD10/RAB21/RB1/RBBP7/RHOA/RICTOR/RPS6KA3/RTN4/RYK/SHTN1/SLC9A6/SPAG9/TAF9B/TEAD1/TGFBR1/VCL/VGLL4/WASF1/YAP1	52
BP	GO:0001933	negative regulation of protein phosphorylation	39/1199	338/18903	0.000220001	0.00422016	0.00346151	ADAR/AKT1/APC/CALM1/CBL/CHORDC1/CHP1/DNAJA1/DNAJC10/DNAJC3/GGNBP2/GNAQ/GSKIP/HIPK3/HMGCR/IBTK/IPO7/LRP6/LYN/MACROH2A1/NPM1/PAK2/PAQR3/PPP1R15B/PPP2CA/PRKAR1A/PRKAR2A/PRKDC/PRNP/PTPN1/RB1/SH3BP5/SNX6/SOCS4/SPAG9/TARDBP/TMED2/WARS1/YWHAG	39
BP	GO:0043434	response to peptide hormone	46/1199	421/18903	0.000225054	0.00430199	0.00352863	AHCYL1/AKT1/AP3S1/APC/APPL1/ATP2B1/BSG/CREB1/DAG1/DENND4C/EIF4EBP2/EPRS1/GSK3B/HADHA/IDE/INSIG1/JAK1/LRP6/LTA4H/LYN/MAP1B/NUCKS1/OSBPL8/PHIP/PIK3C2A/PKM/PRKAA1/PRKDC/PTPN1/PTPN11/RAB10/RAB12/RB1/RHOQ/ROCK1/ROCK2/RPS6KB1/SLC39A14/SMARCC1/SORT1/SP1/STAT1/SYAP1/USO1/XBP1/YWHAG	46
BP	GO:0045787	positive regulation of cell cycle	41/1199	362/18903	0.000228699	0.00435643	0.00357329	AKT1/APP/ATRX/CALR/CCND1/CCNT1/CCNY/CDC27/CDC42/CDC73/CDK1/CHMP3/CUL4B/DDX3X/ECT2/HNRNPU/LRP6/MACROH2A1/MDM2/MED1/NPM1/PAFAH1B1/PHIP/PKN2/PSMD10/PTPN11/RAB11A/RACGAP1/RAD21/RB1/RCC2/RDX/RHOA/ROCK2/RPS15A/RPS6KB1/RRM2B/SLF2/SMC4/TFDP1/TMOD3	41
BP	GO:0048259	regulation of receptor-mediated endocytosis	18/1199	112/18903	0.000233371	0.00443001	0.00363363	ARF1/ARF6/ATAD1/B2M/BMP2K/CBL/CD2AP/FMR1/HNRNPK/MKLN1/MTMR2/PICALM/PPP3R1/PPT1/RAB21/RAC1/SCYL2/UBQLN2	18
BP	GO:0006695	cholesterol biosynthetic process	12/1199	58/18903	0.000235317	0.0044322	0.00363544	CYB5R3/ERLIN2/HMGCR/HMGCS1/IDI1/INSIG1/LBR/MBTPS1/MBTPS2/MSMO1/PRKAA1/SC5D	12
BP	GO:1902653	secondary alcohol biosynthetic process	12/1199	58/18903	0.000235317	0.0044322	0.00363544	CYB5R3/ERLIN2/HMGCR/HMGCS1/IDI1/INSIG1/LBR/MBTPS1/MBTPS2/MSMO1/PRKAA1/SC5D	12
BP	GO:0016358	dendrite development	30/1199	237/18903	0.000235919	0.0044322	0.00363544	ABI1/ABI2/ACTR2/APP/ARF4/ARF6/C21orf91/CAMSAP2/CAPRIN1/CDC42/CFL1/FMR1/GSK3B/HDAC2/ITGB1/KIDINS220/MAP1B/MAPK6/PAFAH1B1/PAK2/PDLIM5/PICALM/PPP3CA/RAB21/RAP2A/RHOA/SLC25A46/STRN/UBA6/UBE3A	30
BP	GO:1903076	regulation of protein localization to plasma membrane	17/1199	103/18903	0.00024872	0.00465246	0.0038161	ACSL3/ACTB/AKT1/APPL1/ARF6/ATP2B4/ATP2C1/CLTC/GOPC/ITGB1/KIF5B/LYPLA1/PICALM/PLS1/PRNP/RHOQ/TMEM59	17
BP	GO:0090068	positive regulation of cell cycle process	32/1199	260/18903	0.000249345	0.00465246	0.0038161	AKT1/APP/ATRX/CCND1/CDC27/CDC42/CDC73/CDK1/CHMP3/CUL4B/DDX3X/ECT2/HNRNPU/MACROH2A1/MDM2/MED1/NPM1/PHIP/PKN2/RAB11A/RACGAP1/RAD21/RB1/RCC2/RDX/RHOA/ROCK2/RRM2B/SLF2/SMC4/TFDP1/TMOD3	32
BP	GO:0010390	histone monoubiquitination	9/1199	35/18903	0.000253175	0.0046919	0.00384845	BMI1/CDC73/CTR9/CUL4B/PCGF3/PCGF5/RYBP/SKP1/WAC	9
BP	GO:0050685	positive regulation of mRNA processing	9/1199	35/18903	0.000253175	0.0046919	0.00384845	CDC73/HSPA8/NCBP2/NUDT21/PRDX6/RBMX/SF3B4/THRAP3/TRA2B	9
BP	GO:1902850	microtubule cytoskeleton organization involved in mitosis	23/1199	163/18903	0.000256446	0.00473645	0.00388499	CCSAP/CEP97/CHMP2B/CHMP3/CLASP1/CLASP2/CLTC/FBXW11/HNRNPU/ITGB1/LSM14A/MAP4/MAPRE1/PAFAH1B1/RAB11A/RACGAP1/RAN/RHOA/SMC1A/STAG2/STMN1/TACC1/TNKS	23
BP	GO:0032206	positive regulation of telomere maintenance	13/1199	67/18903	0.000257576	0.0047413	0.00388897	ATRX/CCT6A/CCT8/CTNNB1/HNRNPA1/HNRNPA2B1/INO80D/MAPK1/NEK7/TNKS/TNKS2/UCHL5/XRCC5	13
BP	GO:2000142	regulation of DNA-templated transcription initiation	14/1199	76/18903	0.000267584	0.004909	0.00402652	ATF7IP/BCLAF1/CAND1/GTF2A1/HMGB1/MED1/MED13/MED14/MED23/MED28/RRN3/SUB1/TAF13/ZNF451	14
BP	GO:0000082	G1/S transition of mitotic cell cycle	31/1199	250/18903	0.000270927	0.00495371	0.00406319	ACTB/AKT1/APC/APPL1/BACH1/CACUL1/CASP2/CCND1/CDC73/CDK6/CUL4B/CUL5/DDX3X/E2F3/FHL1/GSPT1/ITGB1/KHDRBS1/MDM2/PBRM1/PHF10/PPP2CA/PPP3CA/PPP6C/PRKDC/RB1/RDX/RPS6KB1/SMARCC1/TFDP1/WAC	31
BP	GO:0043666	regulation of phosphoprotein phosphatase activity	12/1199	59/18903	0.000278573	0.00505967	0.0041501	CALM1/FKBP1A/GSK3B/HSP90AB1/HSP90B1/MGAT5/PPP1R12A/PPP1R15B/PPP6R3/ROCK1/ROCK2/TIPRL	12
BP	GO:0045010	actin nucleation	12/1199	59/18903	0.000278573	0.00505967	0.0041501	ABI2/ACTR2/ACTR3/ARF1/ARFIP1/ARPC5/BRK1/GMFB/JMY/NCKAP1/WASF1/WASHC4	12
BP	GO:0032200	telomere organization	25/1199	185/18903	0.000279906	0.00506704	0.00415615	ATRX/CCT6A/CCT8/CTNNB1/DCP2/H3-3B/HNRNPA1/HNRNPA2B1/HNRNPC/HNRNPU/HSP90AA1/HSP90AB1/INO80D/MAPK1/NEK7/PRKDC/PTGES3/SHLD2/SLF2/SMG1/TENT4B/TNKS/TNKS2/UCHL5/XRCC5	25
BP	GO:0071501	cellular response to sterol depletion	6/1199	16/18903	0.000296395	0.00533022	0.00437202	AMFR/ERLIN2/INSIG1/SPRING1/SREBF2/TMED2	6
BP	GO:0031440	regulation of mRNA 3'-end processing	7/1199	22/18903	0.000297369	0.00533022	0.00437202	AHCYL1/CDC73/NCBP2/NUDT21/PAPOLA/VIRMA/ZC3H14	7
BP	GO:0010508	positive regulation of autophagy	21/1199	144/18903	0.00029647	0.00533022	0.00437202	BNIP3L/CALCOCO2/CCNY/GNAI3/GSK3B/HIF1A/HMGB1/MTDH/PAFAH1B2/PIK3C2A/PRKAA1/RAB3GAP1/RB1CC1/ROCK1/SCOC/SH3GLB1/SLC25A5/SPTLC1/TMEM59/TP53INP1/WAC	21
BP	GO:0032092	positive regulation of protein binding	15/1199	86/18903	0.000305699	0.00546163	0.0044798	AMFR/APP/B2M/FKBP1A/GSK3B/HIPK2/HSP90AB1/IDE/MAPRE1/NMD3/PPP2CA/PPP2CB/RAN/RPL11/USP33	15
BP	GO:0051494	negative regulation of cytoskeleton organization	23/1199	165/18903	0.000307066	0.00546817	0.00448517	ADD3/APC/ATXN7/CAMSAP2/CAPZA1/CAPZA2/CLASP1/CLASP2/FKBP4/GMFB/LIMA1/MAP1B/MAPRE1/MET/MTPN/NPM1/PAK2/PFN2/RDX/STMN1/TAOK1/TMOD3/TWF1	23
BP	GO:0006354	DNA-templated transcription elongation	30/1199	241/18903	0.000315652	0.00560282	0.00459562	AEBP2/AKIRIN1/ATF7IP/BCLAF1/CAMTA1/CCNT1/CDC73/CTNNB1/CTR9/DHX9/EAF1/HMGN1/HNRNPU/KDM7A/MED1/MED13/MED14/MED23/MED28/MTDH/NAB1/NCBP2/PHF10/PSIP1/RSF1/RYBP/TAF15/THRAP3/WDR82/ZMYND11	30
BP	GO:0098813	nuclear chromosome segregation	37/1199	321/18903	0.000321691	0.00569154	0.00466838	ACTB/ACTR2/ACTR3/APC/ATRX/BAZ1B/CDC27/CDC42/CHMP2B/CHMP3/CTCF/CTNNB1/ECT2/HNRNPU/MACROH2A1/MAPRE1/NAA50/PBRM1/PDS5A/PHF10/RAB11A/RACGAP1/RAD21/RAN/RB1/RCC2/SEH1L/SLF2/SMARCA5/SMARCC1/SMC1A/SMC4/STAG2/SUN1/TNKS/TOP2A/TOP2B	37
BP	GO:0033866	nucleoside bisphosphate biosynthetic process	12/1199	60/18903	0.000328393	0.00573586	0.00470474	ACSL3/ACSL4/DLAT/DLD/ELOVL5/HACD2/HSD17B12/PANK3/PAPSS1/PDHB/PPT1/SLC26A2	12
BP	GO:0034030	ribonucleoside bisphosphate biosynthetic process	12/1199	60/18903	0.000328393	0.00573586	0.00470474	ACSL3/ACSL4/DLAT/DLD/ELOVL5/HACD2/HSD17B12/PANK3/PAPSS1/PDHB/PPT1/SLC26A2	12
BP	GO:0034033	purine nucleoside bisphosphate biosynthetic process	12/1199	60/18903	0.000328393	0.00573586	0.00470474	ACSL3/ACSL4/DLAT/DLD/ELOVL5/HACD2/HSD17B12/PANK3/PAPSS1/PDHB/PPT1/SLC26A2	12
BP	GO:0006352	DNA-templated transcription initiation	21/1199	145/18903	0.000326385	0.00573586	0.00470474	ATF7IP/BAZ2A/BCLAF1/CAND1/DR1/E2F3/GTF2A1/HMGB1/MED1/MED13/MED14/MED23/MED28/POLR1F/RRN3/RSF1/SMARCA5/SUB1/TAF13/TAF9B/ZNF451	21
BP	GO:0006622	protein targeting to lysosome	8/1199	29/18903	0.000330834	0.00576009	0.00472462	AP3M1/GNPTAB/HSPA8/LAMP2/NCOA4/SCARB2/SORT1/ZFYVE16	8
BP	GO:0075522	IRES-dependent viral translational initiation	5/1199	11/18903	0.000340655	0.00591225	0.00484942	CSDE1/DENR/EIF3A/PTBP1/SSB	5
BP	GO:0042326	negative regulation of phosphorylation	42/1199	381/18903	0.000343826	0.00592964	0.00486368	ADAR/AKT1/APC/CALM1/CBL/CHORDC1/CHP1/DNAJA1/DNAJC10/DNAJC3/GGNBP2/GNAQ/GSKIP/HIPK3/HMGCR/HNRNPU/IBTK/IPO7/LRP6/LYN/MACROH2A1/NPM1/PAK2/PAQR3/PPP1R15B/PPP2CA/PRDX3/PRKAR1A/PRKAR2A/PRKDC/PRNP/PTPN1/RB1/ROCK1/SH3BP5/SNX6/SOCS4/SPAG9/TARDBP/TMED2/WARS1/YWHAG	42
BP	GO:0001503	ossification	46/1199	429/18903	0.000343399	0.00592964	0.00486368	ACVR2B/ADAR/AKT1/ATP2B1/ATP5F1B/BMP2K/BMPR2/BPNT2/CBFB/CCDC47/CDK6/CLTC/COL6A1/CTNNB1/DDX21/DDX5/DHX9/GSK3B/H3-3B/HIF1A/HNRNPC/HNRNPU/IARS1/IL6ST/KLF10/MAPK1/NAB1/NBR1/PPP3CA/PRKACA/PTPN11/RBMX/RBPJ/RHOA/RPL38/SGMS2/SLC26A2/SMAD5/SNX10/SORT1/SP3/SUCO/SYNCRIP/TMEM64/YAP1/ZMPSTE24	46
BP	GO:0070972	protein localization to endoplasmic reticulum	14/1199	78/18903	0.000354105	0.00608771	0.00499334	ANKRD13C/GABARAPL2/INSIG1/KDELR1/MAN1A1/OS9/RAB10/RAB3GAP1/RTN4/SEC62/SPCS3/SRP14/SRP72/TRAM1	14
BP	GO:0007249	I-kappaB kinase/NF-kappaB signaling	34/1199	288/18903	0.000356263	0.0061056	0.00500801	AKT1/ASH1L/ATP2C1/BIRC2/CTNNB1/DDX21/DHX15/ECT2/F2R/FKBP1A/HACD3/HDAC1/LITAF/MIER1/MTDH/NDFIP1/NDFIP2/PPM1A/RHOA/RIOK3/ROCK1/ROCK2/SHISA5/STAT1/TAB2/TAB3/TFRC/TMED4/TNFRSF10B/TSPAN6/UBE2I/UBE2N/WLS/ZMYND11	34
BP	GO:0030518	intracellular steroid hormone receptor signaling pathway	18/1199	116/18903	0.000363971	0.00621822	0.00510038	CALR/CLOCK/CNOT1/DDX17/DDX5/DNAJA1/FKBP4/HDAC1/MED1/NCOA4/PTGES3/RBFOX2/RHOA/RNF14/RWDD1/TMF1/UBE3A/YAP1	18
BP	GO:0031503	protein-containing complex localization	24/1199	178/18903	0.000379711	0.00646692	0.00530437	ABCE1/AP2B1/ATAD1/DAG1/FKBP4/GPC4/HNRNPU/KIF5B/LMNB2/NMD3/NPM1/NPTN/PPP3R1/PURA/RAB11A/RAN/RAP1A/RCC2/SEH1L/SSX2IP/STAU1/SYNJ2BP/VPS35/XPO1	24
BP	GO:0043123	positive regulation of I-kappaB kinase/NF-kappaB signaling	25/1199	189/18903	0.000389208	0.00658762	0.00540338	ATP2C1/BIRC2/CTNNB1/DDX21/DHX15/ECT2/F2R/FKBP1A/LITAF/MIER1/MTDH/NDFIP1/NDFIP2/PPM1A/RHOA/SHISA5/TAB2/TAB3/TFRC/TMED4/TNFRSF10B/TSPAN6/UBE2I/UBE2N/WLS	25
BP	GO:0046700	heterocycle catabolic process	49/1199	468/18903	0.000388733	0.00658762	0.00540338	AASDHPPT/AGO1/AGO2/AKT1/CASC3/CNOT1/CNOT6/CNOT7/CSDE1/DCP2/DDX5/DHX9/DICER1/ENPP4/FMR1/GRSF1/GSPT1/HNRNPA0/HNRNPAB/HNRNPC/HNRNPU/IGF2BP3/MTREX/NCBP2/NPM1/PABPC1/PATL1/PDE12/PUM2/RBM8A/RC3H2/ROCK1/ROCK2/SAMD4B/SAMHD1/SERBP1/SMG1/SSB/SUCLA2/SYNCRIP/TAF15/TARDBP/TENT4B/THRAP3/WDR82/YBX1/YTHDF3/ZC3H14/ZC3HAV1	49
BP	GO:1901983	regulation of protein acetylation	15/1199	88/18903	0.000395429	0.00667226	0.0054728	BAZ1B/CTCF/DDX21/DDX3X/DEK/DIP2B/GSK3B/HDAC2/PRKAA1/SET/SF3B1/SMARCA5/TAOK1/ZMPSTE24/ZNF451	15
BP	GO:0018105	peptidyl-serine phosphorylation	36/1199	313/18903	0.000401071	0.00674663	0.0055338	AKT1/APP/ATP2B4/CDK1/CSNK1G3/CSNK2A1/GGNBP2/GSK3B/HIPK1/HIPK2/HIPK3/HSP90AA1/HSP90AB1/MAPK1/MAPK9/NEK7/PAK2/PAQR3/PFN2/PIKFYVE/PKN2/PRKAA1/PRKACA/PRKDC/RICTOR/ROCK1/ROCK2/RPS6KA3/RPS6KB1/SMG1/STK38L/TFRC/TGFBR1/TNKS/TOP1/UHMK1	36
BP	GO:0043489	RNA stabilization	13/1199	70/18903	0.000403827	0.00677215	0.00555473	CSDE1/DHX9/HNRNPA0/HNRNPC/HNRNPU/IGF2BP3/PABPC1/SYNCRIP/TAF15/TARDBP/TENT4B/THRAP3/YBX1	13
BP	GO:0140014	mitotic nuclear division	37/1199	325/18903	0.000409173	0.00684082	0.00561106	ACTB/ANLN/APC/ATRX/BAZ1B/CCSAP/CDC27/CDC42/CEP97/CHMP2B/CHMP3/CLASP1/CLASP2/HNRNPU/LSM14A/MACROH2A1/MAPRE1/NAA50/PBRM1/PDS5A/PHF10/PHIP/RAB11A/RACGAP1/RAD21/RAN/RB1/RHOA/SEH1L/SLF2/SMARCA5/SMARCC1/SMC1A/SMC4/STAG2/TNKS/UBE2I	37
BP	GO:1902414	protein localization to cell junction	16/1199	98/18903	0.000424413	0.00707399	0.00580231	ACTB/ACTG1/DAG1/DSP/GPC4/HOMER1/JAK1/KIF3A/KIF5B/MAPK9/PAK2/RAB11A/RAP1A/STAU1/VCL/VPS35	16
BP	GO:0070198	protein localization to chromosome, telomeric region	8/1199	30/18903	0.00042627	0.00708333	0.00580998	ATRX/CCT6A/CCT8/MACROH2A1/TNKS/TNKS2/TPP1/XRCC5	8
BP	GO:1902916	positive regulation of protein polyubiquitination	6/1199	17/18903	0.000433576	0.00718291	0.00589166	BIRC2/DDX3X/MARCHF7/UBE2N/UBE2V2/XIAP	6
BP	GO:0032387	negative regulation of intracellular transport	12/1199	62/18903	0.000450897	0.00740257	0.00607182	ARFIP1/CHP1/ERLEC1/INSIG1/LMAN1/MAP1B/OS9/SNX3/SUMO1/UBE2J1/VPS35/YOD1	12
BP	GO:0061951	establishment of protein localization to plasma membrane	12/1199	62/18903	0.000450897	0.00740257	0.00607182	ACSL3/ATP2C1/ATP6AP1/GOLPH3/GOPC/LYPLA1/PREPL/RAB10/RAB11A/RDX/VAMP3/VPS35	12
BP	GO:0030218	erythrocyte differentiation	19/1199	128/18903	0.000450339	0.00740257	0.00607182	ABCB10/ADAR/B2M/CDK6/EPAS1/HIF1A/HIPK2/HSPA9/LYN/MED1/PRKDC/PTBP3/RB1/SFXN1/SLC25A5/SMAD5/SP3/STAT1/TMOD3	19
BP	GO:2000036	regulation of stem cell population maintenance	13/1199	71/18903	0.000466089	0.00762906	0.0062576	ACTB/CNOT1/HDAC1/HDAC2/NCOA3/PHF10/RBBP4/RBBP7/SINHCAF/SMARCC1/SS18/SUDS3/YAP1	13
BP	GO:1902743	regulation of lamellipodium organization	11/1199	54/18903	0.000488749	0.00797609	0.00654225	ABI2/ACTR2/ACTR3/AKIRIN1/BRK1/CDC42/FSCN1/HSP90AA1/NCKAP1/RAC1/TWF1	11
BP	GO:0045931	positive regulation of mitotic cell cycle	19/1199	129/18903	0.000497366	0.00809255	0.00663777	AKT1/APP/CCND1/CDC27/CDK1/CUL4B/DDX3X/MDM2/PAFAH1B1/PKN2/PTPN11/RAB11A/RB1/RCC2/RDX/RPS6KB1/RRM2B/TFDP1/TMOD3	19
BP	GO:0045995	regulation of embryonic development	15/1199	90/18903	0.000506845	0.00822231	0.00674421	CCSAP/CDK1/CFL1/CLASP1/CLASP2/CTNNB1/DAG1/DR1/INO80D/PAFAH1B1/RAB14/RACGAP1/SEPTIN7/TRIP12/UCHL5	15
BP	GO:0044270	cellular nitrogen compound catabolic process	49/1199	474/18903	0.000518816	0.00839162	0.00688307	AASDHPPT/AGO1/AGO2/AKT1/CASC3/CNOT1/CNOT6/CNOT7/CSDE1/DCP2/DDX5/DHX9/DICER1/ENPP4/FMR1/GRSF1/GSPT1/HNRNPA0/HNRNPAB/HNRNPC/HNRNPU/IGF2BP3/MTREX/NCBP2/NPM1/PABPC1/PATL1/PDE12/PUM2/RBM8A/RC3H2/ROCK1/ROCK2/SAMD4B/SAMHD1/SERBP1/SMG1/SSB/SUCLA2/SYNCRIP/TAF15/TARDBP/TENT4B/THRAP3/WDR82/YBX1/YTHDF3/ZC3H14/ZC3HAV1	49
BP	GO:0007062	sister chromatid cohesion	12/1199	63/18903	0.000525329	0.0084719	0.00694893	ATRX/CTCF/CTNNB1/MACROH2A1/NAA50/PDS5A/RAD21/RB1/SLF2/SMC1A/STAG2/TNKS	12
BP	GO:0097061	dendritic spine organization	14/1199	81/18903	0.000528192	0.00849302	0.00696625	ABI2/ACTR2/ARF1/CAPRIN1/CDC42/CFL1/CTTN/HOMER1/MTMR2/PAFAH1B1/PDLIM5/PRNP/UBE3A/VPS35	14
BP	GO:0000070	mitotic sister chromatid segregation	26/1199	204/18903	0.000536981	0.00860902	0.0070614	ACTB/APC/ATRX/BAZ1B/CDC27/CHMP2B/CHMP3/HNRNPU/MACROH2A1/MAPRE1/NAA50/PBRM1/PDS5A/PHF10/RAB11A/RACGAP1/RAD21/RAN/RB1/SEH1L/SLF2/SMARCA5/SMARCC1/SMC1A/SMC4/TNKS	26
BP	GO:0006099	tricarboxylic acid cycle	8/1199	31/18903	0.000542896	0.00867839	0.0071183	CS/DLAT/IDH3A/IREB2/PDHB/SDHC/SDHD/SUCLA2	8
BP	GO:0034086	maintenance of sister chromatid cohesion	5/1199	12/18903	0.000553525	0.00874602	0.00717377	ATRX/MACROH2A1/RB1/SLF2/TNKS	5
BP	GO:0034088	maintenance of mitotic sister chromatid cohesion	5/1199	12/18903	0.000553525	0.00874602	0.00717377	ATRX/MACROH2A1/RB1/SLF2/TNKS	5
BP	GO:0061795	Golgi lumen acidification	5/1199	12/18903	0.000553525	0.00874602	0.00717377	ATP6AP1/ATP6AP2/ATP6V1A/ATP6V1D/UBE3A	5
BP	GO:1904667	negative regulation of ubiquitin protein ligase activity	5/1199	12/18903	0.000553525	0.00874602	0.00717377	RPL11/RPL37/RPL5/RPS20/RPS7	5
BP	GO:1905475	regulation of protein localization to membrane	23/1199	172/18903	0.000559966	0.00882229	0.00723633	ACSL3/ACTB/AKT1/APPL1/ARF6/ATP2B4/ATP2C1/CD81/CHP1/CLTC/DAG1/GOPC/GPC4/ITGB1/KIF5B/LYPLA1/PICALM/PLS1/PRNP/RAP1A/RHOQ/SLC5A3/TMEM59	23
BP	GO:0008361	regulation of cell size	24/1199	183/18903	0.000571299	0.00897498	0.00736157	ADNP/ARHGAP5/BMPR2/CREB1/CTTN/DIP2B/GSK3B/HSP90AA1/HSP90AB1/LARS1/MAP1B/MSN/MTPN/NPM1/PAFAH1B1/RAB21/RAC1/RB1CC1/RDX/RHOA/RTN4/RYK/SHTN1/TMEM123	24
BP	GO:0048872	homeostasis of number of cells	34/1199	296/18903	0.000586878	0.0091933	0.00754064	ABCB10/ADAR/AKT1/B2M/CDK6/EPAS1/F2R/HIF1A/HIPK2/HMGB1/HSPA9/IREB2/KRAS/LIPA/LYN/MED1/PRDX1/PRKDC/PTBP3/PTPN11/RB1/RC3H2/RPS24/RRN3/SFXN1/SKIL/SLC25A5/SMAD5/SOS1/SP3/STAT1/TMOD3/UBAP2L/XIAP	34
BP	GO:0006595	polyamine metabolic process	6/1199	18/18903	0.00061564	0.00948086	0.00777651	AMD1/AZIN1/OAZ1/OAZ2/ODC1/SMS	6
BP	GO:0036507	protein demannosylation	6/1199	18/18903	0.00061564	0.00948086	0.00777651	AMFR/EDEM3/MAN1A1/MAN1A2/MARCHF6/UGGT1	6
BP	GO:0036508	protein alpha-1,2-demannosylation	6/1199	18/18903	0.00061564	0.00948086	0.00777651	AMFR/EDEM3/MAN1A1/MAN1A2/MARCHF6/UGGT1	6
BP	GO:0051988	regulation of attachment of spindle microtubules to kinetochore	6/1199	18/18903	0.00061564	0.00948086	0.00777651	APC/CDC42/ECT2/HNRNPU/RACGAP1/RCC2	6
BP	GO:0030521	androgen receptor signaling pathway	10/1199	47/18903	0.000608219	0.00948086	0.00777651	DDX17/DDX5/DNAJA1/FKBP4/HDAC1/RHOA/RNF14/RWDD1/TMF1/UBE3A	10
BP	GO:0018209	peptidyl-serine modification	37/1199	332/18903	0.000614151	0.00948086	0.00777651	AKT1/APP/ATP2B4/CDK1/CSNK1G3/CSNK2A1/GALNT1/GGNBP2/GSK3B/HIPK1/HIPK2/HIPK3/HSP90AA1/HSP90AB1/MAPK1/MAPK9/NEK7/PAK2/PAQR3/PFN2/PIKFYVE/PKN2/PRKAA1/PRKACA/PRKDC/RICTOR/ROCK1/ROCK2/RPS6KA3/RPS6KB1/SMG1/STK38L/TFRC/TGFBR1/TNKS/TOP1/UHMK1	37
BP	GO:0009791	post-embryonic development	15/1199	92/18903	0.00064403	0.0098902	0.00811226	ACADM/ACVR2B/AGO2/ASH1L/ATRX/BPNT2/CCDC47/HMGN1/IREB2/PLEKHA1/RC3H2/SERP1/SGPL1/SOD2/TGFBR1	15
BP	GO:0033522	histone H2A ubiquitination	8/1199	32/18903	0.000684031	0.0103304	0.00847331	BMI1/CUL4B/PCGF3/PCGF5/RYBP/SKP1/TRIP12/UBE2A	8
BP	GO:0034315	regulation of Arp2/3 complex-mediated actin nucleation	8/1199	32/18903	0.000684031	0.0103304	0.00847331	ABI2/ARF1/ARFIP1/BRK1/GMFB/NCKAP1/WASF1/WASHC4	8
BP	GO:0046825	regulation of protein export from nucleus	8/1199	32/18903	0.000684031	0.0103304	0.00847331	CTDSPL2/GSK3B/PPM1A/PRKACA/PTPN11/UHMK1/XPO1/XPO4	8
BP	GO:0051085	chaperone cofactor-dependent protein refolding	8/1199	32/18903	0.000684031	0.0103304	0.00847331	DNAJB14/ERO1A/HSPA13/HSPA8/HSPA9/HSPH1/PTGES3/ST13	8
BP	GO:0006900	vesicle budding from membrane	14/1199	83/18903	0.000680832	0.0103304	0.00847331	AP3S1/FNBP1L/GOLPH3/INSIG1/PICALM/PPP6C/RAB1A/SAR1A/SAR1B/SEC23A/SEC24A/SNX3/TMED10/TMED2	14
BP	GO:0008286	insulin receptor signaling pathway	18/1199	122/18903	0.000677043	0.0103304	0.00847331	AKT1/AP3S1/APC/APPL1/EIF4EBP2/GSK3B/IDE/NUCKS1/OSBPL8/PHIP/PIK3C2A/PRKAA1/PTPN1/PTPN11/RHOQ/RPS6KB1/SLC39A14/SMARCC1	18
BP	GO:0090307	mitotic spindle assembly	13/1199	74/18903	0.000703759	0.010599	0.00869368	CCSAP/CEP97/CHMP2B/CHMP3/CLASP1/CLASP2/HNRNPU/LSM14A/RAB11A/RACGAP1/RHOA/SMC1A/STAG2	13
BP	GO:0042147	retrograde transport, endosome to Golgi	15/1199	93/18903	0.000723707	0.0108101	0.00886681	ARFIP1/ARL1/CLTC/PIKFYVE/PREPL/RAB6A/RHOBTB3/SNX1/SNX3/SNX6/SPAG9/TBC1D23/VAMP3/VPS26A/VPS35	15
BP	GO:0045185	maintenance of protein location	15/1199	93/18903	0.000723707	0.0108101	0.00886681	AKT1/ANKRD13C/ARL2BP/G3BP2/GOLPH3/GOPC/HNRNPU/INSIG1/KDELR1/OS9/PSMD10/SKP1/SUN1/TWF1/YWHAB	15
BP	GO:0045814	negative regulation of gene expression, epigenetic	15/1199	93/18903	0.000723707	0.0108101	0.00886681	ATF7IP/BAZ2A/BMI1/CBX3/CTCF/CTR9/H1-0/H3-3B/HDAC1/HMGB1/LMNB2/MACROH2A1/RB1/SMARCA5/SPTY2D1	15
BP	GO:0007052	mitotic spindle organization	19/1199	133/18903	0.000730498	0.0108732	0.00891853	CCSAP/CEP97/CHMP2B/CHMP3/CLASP1/CLASP2/CLTC/HNRNPU/LSM14A/MAP4/RAB11A/RACGAP1/RAN/RHOA/SMC1A/STAG2/STMN1/TACC1/TNKS	19
BP	GO:0034599	cellular response to oxidative stress	33/1199	288/18903	0.000731906	0.0108732	0.00891853	AKT1/ARL6IP5/ATF2/ATP2A2/CDK1/CTNNB1/ECT2/EIF2S1/EPAS1/ERMP1/GCH1/GSKIP/HDAC2/HIF1A/LANCL1/MAPK1/MAPK9/MCL1/MET/OXR1/PLEKHA1/PRDX1/PRDX3/PRKAA1/RWDD1/SELENON/SLC25A24/SOD2/STAU1/STK24/TP53INP1/UBQLN1/VKORC1L1	33
BP	GO:0033120	positive regulation of RNA splicing	9/1199	40/18903	0.000736303	0.0109089	0.0089478	HSPA8/POLR2A/PRDX6/RBMX/SF3B4/SLC38A2/THRAP3/TRA2B/U2AF2	9
BP	GO:0140056	organelle localization by membrane tethering	14/1199	84/18903	0.000770185	0.01138	0.00933424	AHCYL1/ATP2A2/BLOC1S6/CALM1/ESYT2/EXOC4/EXOC5/EXOC8/PDZD8/RAB10/RAB12/STX12/USO1/VAMP3	14
BP	GO:0034605	cellular response to heat	12/1199	66/18903	0.000813257	0.0119404	0.00979388	CHORDC1/EIF2S1/GSK3B/HDAC2/HSBP1/HSP90AA1/HSP90AB1/LYN/PRKACA/RBBP7/SLU7/SUMO1	12
BP	GO:1903051	negative regulation of proteolysis involved in protein catabolic process	12/1199	66/18903	0.000813257	0.0119404	0.00979388	CSNK2A1/GABARAPL2/HIPK2/HSP90AB1/MARCHF7/RPL11/RPL5/RPS7/RYBP/SMARCC1/UCHL5/WAC	12
BP	GO:0043122	regulation of I-kappaB kinase/NF-kappaB signaling	30/1199	255/18903	0.000814663	0.0119404	0.00979388	ASH1L/ATP2C1/BIRC2/CTNNB1/DDX21/DHX15/ECT2/F2R/FKBP1A/HDAC1/LITAF/MIER1/MTDH/NDFIP1/NDFIP2/PPM1A/RHOA/RIOK3/SHISA5/STAT1/TAB2/TAB3/TFRC/TMED4/TNFRSF10B/TSPAN6/UBE2I/UBE2N/WLS/ZMYND11	30
BP	GO:0009408	response to heat	17/1199	114/18903	0.000834319	0.0121958	0.0100034	AKT1/CHORDC1/DNAJA1/EIF2S1/GSK3B/HDAC2/HSBP1/HSP90AA1/HSP90AB1/LYN/PRKACA/PSIP1/RBBP7/RPS6KB1/SLU7/SUMO1/TP53INP1	17
BP	GO:0048511	rhythmic process	34/1199	302/18903	0.000838008	0.012217	0.0100208	ADNP/CASP2/CBX3/CDK1/CLOCK/CREB1/CSNK2A1/DDX5/DHX9/FBXW11/GFPT1/GNAQ/GSK3B/HDAC1/HDAC2/HNRNPU/HOMER1/KDM5A/KLF10/MAPK9/NR1D2/PAM/PLEKHA1/PPP1CB/PRKAA1/PRKDC/ROCK2/SGPL1/SP1/TARDBP/THRAP3/TOP1/TOP2A/UBE3A	34
BP	GO:0034333	adherens junction assembly	5/1199	13/18903	0.000852649	0.012341	0.0101225	ACTB/CTNNB1/HIPK1/PAK2/VCL	5
BP	GO:0098935	dendritic transport	5/1199	13/18903	0.000852649	0.012341	0.0101225	HNRNPU/KIF5B/PURA/STAU1/WASF1	5
BP	GO:0061842	microtubule organizing center localization	8/1199	33/18903	0.000853282	0.012341	0.0101225	ARPC5/DYNC1LI2/KIF5B/NIN/PAFAH1B1/RANBP2/SUN1/SYNE2	8
BP	GO:0072595	maintenance of protein localization in organelle	9/1199	41/18903	0.000890991	0.0128524	0.0105419	AKT1/ANKRD13C/ARL2BP/HNRNPU/INSIG1/KDELR1/OS9/SKP1/SUN1	9
BP	GO:0008154	actin polymerization or depolymerization	25/1199	200/18903	0.000904232	0.0129749	0.0106424	ABI1/ABI2/ADD3/ARF6/ARPC5/BRK1/CAPZA1/CAPZA2/CFL1/CFL2/COTL1/CTTN/DSTN/ENAH/LIMA1/MTPN/NCKAP1/PFN2/RAC1/RDX/RHOA/RICTOR/TMOD3/TWF1/WASF1	25
BP	GO:0043393	regulation of protein binding	25/1199	200/18903	0.000904232	0.0129749	0.0106424	ACTB/ADNP/AKT1/AMFR/APP/ATP2A2/B2M/BTBD1/CDC42/FKBP1A/GSK3B/HIPK2/HSP90AB1/IDE/MAPRE1/NMD3/PPP2CA/PPP2CB/PRKACA/RAN/ROCK1/RPL11/TGFBR1/TMBIM6/USP33	25
BP	GO:0006517	protein deglycosylation	7/1199	26/18903	0.000917322	0.0130599	0.0107121	AMFR/EDEM3/MAN1A1/MAN1A2/MAN2A1/MARCHF6/UGGT1	7
BP	GO:0034453	microtubule anchoring	7/1199	26/18903	0.000917322	0.0130599	0.0107121	CEP20/CLASP1/CLASP2/DAG1/GSK3B/KIF3A/NIN	7
BP	GO:0044843	cell cycle G1/S phase transition	32/1199	280/18903	0.000912814	0.0130599	0.0107121	ACTB/AKT1/APC/APPL1/ATP2B4/BACH1/CACUL1/CASP2/CCND1/CDC73/CDK6/CUL4B/CUL5/DDX3X/E2F3/FHL1/GSPT1/ITGB1/KHDRBS1/MDM2/PBRM1/PHF10/PPP2CA/PPP3CA/PPP6C/PRKDC/RB1/RDX/RPS6KB1/SMARCC1/TFDP1/WAC	32
BP	GO:0030003	cellular cation homeostasis	50/1199	499/18903	0.00091976	0.0130606	0.0107127	APP/ARF1/ATP13A3/ATP1A1/ATP1B3/ATP2A2/ATP2B1/ATP2B4/ATP2C1/ATP5F1B/ATP6AP1/ATP6AP2/ATP6V1A/ATP6V1D/CALM1/CALR/CCDC47/CHP1/CLIC4/ERO1A/F2R/FKBP1A/FTH1/HIF1A/HSP90B1/IBTK/IREB2/LYN/MAPK1/NCOA4/NDFIP1/NPTN/PDZD8/PPT1/PRKACA/PRNP/SELENON/SLC30A1/SLC30A7/SLC30A9/SLC31A1/SLC39A14/SLC4A7/SLC9A6/TFRC/TMBIM6/TMCO1/TMEM64/TPT1/UBE3A	50
BP	GO:0060260	regulation of transcription initiation by RNA polymerase II	12/1199	67/18903	0.000934496	0.0132355	0.0108562	ATF7IP/CAND1/GTF2A1/HMGB1/MED1/MED13/MED14/MED23/MED28/SUB1/TAF13/ZNF451	12
BP	GO:0001649	osteoblast differentiation	29/1199	246/18903	0.000955305	0.0134604	0.0110407	ACVR2B/ADAR/AKT1/ATP5F1B/BMPR2/CBFB/CCDC47/CDK6/CLTC/COL6A1/CTNNB1/DDX21/DDX5/DHX9/GSK3B/H3-3B/HNRNPC/HNRNPU/IARS1/IL6ST/NBR1/PPP3CA/PRKACA/RBMX/SMAD5/SUCO/SYNCRIP/TMEM64/YAP1	29
BP	GO:0031346	positive regulation of cell projection organization	38/1199	352/18903	0.000954425	0.0134604	0.0110407	ABI2/ACTR2/ACTR3/ADNP/AKIRIN1/ANLN/APC/BMPR2/BRK1/CAPRIN1/CDC42/FAM98A/FMR1/FNBP1L/FSCN1/GSK3B/HSP90AA1/KIDINS220/LYN/MAP1B/MAP2K1/NCKAP1/NIN/NPTN/PAFAH1B1/RAB21/RAC1/RAP1A/RHOQ/SCARB2/SEPTIN7/SHTN1/SKIL/SNX3/STK24/TGFBR1/TMEM30A/TWF1	38
BP	GO:0032271	regulation of protein polymerization	25/1199	201/18903	0.000972011	0.0136606	0.0112049	ADD3/ARF6/ARPC5/CAMSAP2/CAPZA1/CAPZA2/CLASP1/CLIP1/COTL1/CTTN/FKBP4/HSP90AA1/MAP1B/MAPRE1/MET/MTPN/NCKAP1/PFN2/RAC1/RDX/RHOA/RICTOR/STMN1/TMOD3/TWF1	25
BP	GO:2000059	negative regulation of ubiquitin-dependent protein catabolic process	10/1199	50/18903	0.00101496	0.0142276	0.01167	CSNK2A1/HIPK2/HSP90AB1/RPL11/RPL5/RPS7/RYBP/SMARCC1/UCHL5/WAC	10
BP	GO:0019439	aromatic compound catabolic process	49/1199	489/18903	0.00102866	0.0143828	0.0117973	AASDHPPT/AGO1/AGO2/AKT1/CASC3/CNOT1/CNOT6/CNOT7/CSDE1/DCP2/DDX5/DHX9/DICER1/ENPP4/FMR1/GRSF1/GSPT1/HNRNPA0/HNRNPAB/HNRNPC/HNRNPU/IGF2BP3/MTREX/NCBP2/NPM1/PABPC1/PATL1/PDE12/PUM2/RBM8A/RC3H2/ROCK1/ROCK2/SAMD4B/SAMHD1/SERBP1/SMG1/SSB/SUCLA2/SYNCRIP/TAF15/TARDBP/TENT4B/THRAP3/WDR82/YBX1/YTHDF3/ZC3H14/ZC3HAV1	49
BP	GO:0006623	protein targeting to vacuole	9/1199	42/18903	0.00107105	0.0148239	0.0121591	AP3M1/GNPTAB/HSPA8/LAMP2/NCOA4/SCARB2/SORT1/VPS41/ZFYVE16	9
BP	GO:0045022	early endosome to late endosome transport	9/1199	42/18903	0.00107105	0.0148239	0.0121591	CHMP3/HOOK1/MAP2K1/MAPK1/MSN/MTMR2/RAB21/RDX/SNX3	9
BP	GO:0030042	actin filament depolymerization	11/1199	59/18903	0.00106881	0.0148239	0.0121591	ADD3/CAPZA1/CAPZA2/CFL1/CFL2/DSTN/LIMA1/MTPN/RDX/TMOD3/TWF1	11
BP	GO:0070936	protein K48-linked ubiquitination	12/1199	68/18903	0.00107041	0.0148239	0.0121591	AMFR/BIRC2/ITCH/MARCHF6/SKP1/TTC3/UBE2A/UBE2D2/UBE2E3/UBE2H/UBE2K/UBE3A	12
BP	GO:0031110	regulation of microtubule polymerization or depolymerization	14/1199	87/18903	0.00109978	0.0151448	0.0124223	APC/ATXN7/CAMSAP2/CLASP1/CLASP2/CLIP1/FKBP4/MAP1B/MAPRE1/MET/RAC1/SKA2/STMN1/TAOK1	14
BP	GO:1900182	positive regulation of protein localization to nucleus	14/1199	87/18903	0.00109978	0.0151448	0.0124223	AKT1/CCT6A/CCT8/CD2AP/CDK1/ECT2/HSP90AA1/HSP90AB1/NMD3/NPM1/RAN/TARDBP/TFRC/YAP1	14
BP	GO:0051701	biological process involved in interaction with host	25/1199	203/18903	0.00112087	0.0153965	0.0126287	ARL8B/BSG/CBL/CD46/CD81/CDK1/CHMP2B/CHMP3/CTSB/DAG1/EPS15/HMGB1/HSP90AB1/IDE/ITCH/ITGB1/KPNA3/LAMP1/PIKFYVE/RPSA/SCARB2/SNX3/TFRC/THOC2/XPR1	25
BP	GO:0042770	signal transduction in response to DNA damage	23/1199	181/18903	0.00113855	0.0155223	0.0127319	ATF2/ATRX/CASP2/CCND1/CCNG1/CDK1/CLOCK/DDX5/FEM1B/HIPK2/MARCHF7/MDM2/MYO6/NPM1/PRKDC/PSMD10/PTPN11/PTTG1IP/TAOK1/TIPRL/TOPBP1/WAC/ZMPSTE24	23
BP	GO:0098727	maintenance of cell number	23/1199	181/18903	0.00113855	0.0155223	0.0127319	ACTB/CDC73/CNOT1/CTNNB1/CTR9/HDAC1/HDAC2/KLF10/MED14/MED28/NCOA3/PHF10/RBBP4/RBBP7/RBPJ/SELENON/SINHCAF/SMARCC1/SMC1A/SS18/SUDS3/TPT1/YAP1	23
BP	GO:0043543	protein acylation	31/1199	272/18903	0.0011385	0.0155223	0.0127319	ACTB/ATF2/ATXN7/BAZ1B/BMI1/CLOCK/CTCF/DDX21/DDX3X/DEK/DIP2B/DLD/DR1/GLUL/GSK3B/HDAC2/MORF4L1/MORF4L2/NAA20/NAA50/NCOA3/PHF20/PPM1A/PRKAA1/SET/SF3B1/SMARCA5/TAOK1/ZDHHC9/ZMPSTE24/ZNF451	31
BP	GO:0007026	negative regulation of microtubule depolymerization	7/1199	27/18903	0.00117129	0.0158501	0.0130008	APC/ATXN7/CAMSAP2/CLASP1/CLASP2/MAP1B/TAOK1	7
BP	GO:0042026	protein refolding	7/1199	27/18903	0.00117129	0.0158501	0.0130008	B2M/DNAJA1/FKBP1A/HSP90AA1/HSPA13/HSPA8/HSPA9	7
BP	GO:1904357	negative regulation of telomere maintenance via telomere lengthening	7/1199	27/18903	0.00117129	0.0158501	0.0130008	DCP2/HNRNPA1/HNRNPC/HNRNPU/TENT4B/TNKS/TNKS2	7
BP	GO:0150116	regulation of cell-substrate junction organization	12/1199	69/18903	0.00122233	0.0165	0.0135338	ACTG1/ARF6/CLASP1/CLASP2/LIMS1/PEAK1/RAC1/RCC2/RHOA/ROCK1/ROCK2/VCL	12
BP	GO:0055072	iron ion homeostasis	14/1199	88/18903	0.00123304	0.0166035	0.0136187	ATP6AP1/ATP6V1A/B2M/EIF2AK1/EPAS1/FTH1/HIF1A/IREB2/NCOA4/NDFIP1/PICALM/SLC39A14/SOD2/TFRC	14
BP	GO:0062197	cellular response to chemical stress	37/1199	345/18903	0.00124498	0.0167231	0.0137169	AKT1/ARL6IP5/ATF2/ATP2A2/CDK1/CTNNB1/DDX3X/DNAJA1/ECT2/EIF2S1/EPAS1/ERMP1/GCH1/GSKIP/HDAC2/HIF1A/LANCL1/MAPK1/MAPK9/MCL1/MET/OXR1/OXSR1/PLEKHA1/PRDX1/PRDX3/PRKAA1/RWDD1/SELENON/SLC25A24/SOD2/STAU1/STK24/TP53INP1/UBQLN1/VKORC1L1/XRCC5	37
BP	GO:0008608	attachment of spindle microtubules to kinetochore	9/1199	43/18903	0.00127945	0.0170189	0.0139595	APC/CDC42/ECT2/HNRNPU/MAPRE1/RACGAP1/RB1/RCC2/SEH1L	9
BP	GO:0033574	response to testosterone	9/1199	43/18903	0.00127945	0.0170189	0.0139595	CALR/CBL/HOXA9/MSN/MTAP/NCOA4/ROCK2/RPS6KB1/RWDD1	9
BP	GO:0060428	lung epithelium development	9/1199	43/18903	0.00127945	0.0170189	0.0139595	CDC42/CREB1/CTNNB1/KRAS/LTA4H/MAP2K1/PPP3R1/RBPJ/YAP1	9
BP	GO:0090114	COPII-coated vesicle budding	9/1199	43/18903	0.00127945	0.0170189	0.0139595	INSIG1/PPP6C/RAB1A/SAR1A/SAR1B/SEC23A/SEC24A/TMED10/TMED2	9
BP	GO:0031023	microtubule organizing center organization	20/1199	150/18903	0.00129196	0.0171436	0.0140617	CDK1/CETN2/CHMP2B/CHMP3/CHORDC1/CLASP1/CLASP2/CTNNB1/FBXW11/KIF3A/NIN/NPM1/PAFAH1B1/PDCD6IP/PPP1R12A/ROCK2/SLC16A1/SSX2IP/USP33/XPO1	20
BP	GO:0007041	lysosomal transport	18/1199	129/18903	0.00131155	0.0173614	0.0142403	AP3M1/ARL8B/CHMP2B/CHMP3/GNPTAB/HOOK1/HSPA8/LAMP1/LAMP2/NCOA4/PSAP/RAB12/SCARB2/SCYL2/SORT1/VPS35/VPS41/ZFYVE16	18
BP	GO:0044000	movement in host	23/1199	183/18903	0.00132121	0.017447	0.0143106	ARL8B/BSG/CBL/CD46/CD81/CDK1/CHMP2B/CHMP3/CTSB/DAG1/EPS15/HMGB1/IDE/ITCH/ITGB1/KPNA3/LAMP1/PIKFYVE/RPSA/SCARB2/SNX3/TFRC/XPR1	23
BP	GO:0031398	positive regulation of protein ubiquitination	17/1199	119/18903	0.00135837	0.0178945	0.0146776	BIRC2/BMI1/DDX3X/FKBP1A/MAPK9/MARCHF7/NDFIP1/NDFIP2/NPM1/PSMD10/PTTG1IP/SKP1/UBE2N/UBE2V2/UBE3A/UBQLN1/XIAP	17
BP	GO:0060479	lung cell differentiation	7/1199	28/18903	0.0014772	0.0193666	0.0158851	CREB1/CTNNB1/KRAS/LTA4H/PPP3R1/RBPJ/YAP1	7
BP	GO:0060487	lung epithelial cell differentiation	7/1199	28/18903	0.0014772	0.0193666	0.0158851	CREB1/CTNNB1/KRAS/LTA4H/PPP3R1/RBPJ/YAP1	7
BP	GO:0006473	protein acetylation	27/1199	230/18903	0.00149486	0.0195511	0.0160365	ACTB/ATF2/ATXN7/BAZ1B/BMI1/CLOCK/CTCF/DDX21/DDX3X/DEK/DIP2B/DR1/GSK3B/HDAC2/MORF4L1/MORF4L2/NAA20/NAA50/NCOA3/PHF20/PRKAA1/SET/SF3B1/SMARCA5/TAOK1/ZMPSTE24/ZNF451	27
BP	GO:0016601	Rac protein signal transduction	9/1199	44/18903	0.00151933	0.0197766	0.0162214	ABI2/ARF6/BRK1/HACD3/KRAS/NCKAP1/RAC1/SSX2IP/WASF1	9
BP	GO:0021762	substantia nigra development	9/1199	44/18903	0.00151933	0.0197766	0.0162214	ACTB/ATP5PB/CALM1/CDC42/GLUD1/RHOA/SUDS3/YWHAQ/ZNF148	9
BP	GO:0006405	RNA export from nucleus	14/1199	90/18903	0.0015403	0.0199546	0.0163674	AGFG1/CASC3/DHX9/FYTTD1/HNRNPA1/HNRNPA2B1/KHDRBS1/NCBP2/NPM1/RAN/RBM8A/SMG1/SSB/THOC2	14
BP	GO:0040029	epigenetic regulation of gene expression	21/1199	163/18903	0.00153745	0.0199546	0.0163674	ATF7IP/BAZ2A/BMI1/CBX3/CGGBP1/CTCF/CTR9/H1-0/H3-3B/HDAC1/HMGB1/HNRNPU/LMNB2/MACROH2A1/PCGF3/PCGF5/PHF20/RB1/SMARCA5/SPTY2D1/SUZ12	21
BP	GO:1901992	positive regulation of mitotic cell cycle phase transition	15/1199	100/18903	0.00155129	0.0200494	0.0164451	AKT1/APP/CCND1/CDC27/CDK1/CUL4B/DDX3X/MDM2/RAB11A/RB1/RCC2/RDX/RRM2B/TFDP1/TMOD3	15
BP	GO:0045216	cell-cell junction organization	25/1199	208/18903	0.00158192	0.0203971	0.0167304	ACTB/ACTG1/APC/CDC42/CTNNA1/CTNNB1/DSG2/DSP/ECT2/F2R/FSCN1/HIPK1/LIMS1/PAK2/PDCD6IP/PERP/PKN2/PRKACA/RDX/RHOA/ROCK1/ROCK2/STRN/TGFBR1/VCL	25
BP	GO:0009266	response to temperature stimulus	23/1199	186/18903	0.00164215	0.0211239	0.0173265	ACADM/AKT1/ATP2B1/CHORDC1/DNAJA1/DNAJC3/EIF2S1/ERO1A/GSK3B/HDAC2/HSBP1/HSP90AA1/HSP90AB1/LYN/PRKAA1/PRKACA/PSIP1/RBBP7/RPS6KB1/SLU7/SOD2/SUMO1/TP53INP1	23
BP	GO:0061572	actin filament bundle organization	21/1199	164/18903	0.00166049	0.0213096	0.0174788	ACTG1/CALD1/CDC42/CLASP1/CLASP2/FSCN1/HSP90B1/LIMA1/MET/PAK2/PFN2/PLS1/PLS3/RAC1/RDX/RHOA/ROCK1/ROCK2/SHTN1/STMN1/TGFBR1	21
BP	GO:0000054	ribosomal subunit export from nucleus	5/1199	15/18903	0.00178825	0.0223414	0.0183251	ABCE1/NMD3/NPM1/RAN/XPO1	5
BP	GO:0033750	ribosome localization	5/1199	15/18903	0.00178825	0.0223414	0.0183251	ABCE1/NMD3/NPM1/RAN/XPO1	5
BP	GO:0060211	regulation of nuclear-transcribed mRNA poly(A) tail shortening	5/1199	15/18903	0.00178825	0.0223414	0.0183251	AGO2/CNOT1/CNOT7/PABPC1/TENT4B	5
BP	GO:0060576	intestinal epithelial cell development	5/1199	15/18903	0.00178825	0.0223414	0.0183251	C1GALT1/HIF1A/IL6ST/YAP1/YIPF6	5
BP	GO:0070262	peptidyl-serine dephosphorylation	5/1199	15/18903	0.00178825	0.0223414	0.0183251	PPP1R15B/PPP2CA/PPP2CB/PPP3CA/PPTC7	5
BP	GO:0090110	COPII-coated vesicle cargo loading	5/1199	15/18903	0.00178825	0.0223414	0.0183251	INSIG1/RAB1A/SAR1A/SEC23A/SEC24A	5
BP	GO:0032781	positive regulation of ATP-dependent activity	9/1199	45/18903	0.00179401	0.0223414	0.0183251	ATP1B3/DHX9/DNAJC10/GABARAPL2/HNRNPU/PFN2/SUMO1/TOR1AIP1/TOR1AIP2	9
BP	GO:0035384	thioester biosynthetic process	9/1199	45/18903	0.00179401	0.0223414	0.0183251	ACSL3/ACSL4/DLAT/DLD/ELOVL5/HACD2/HSD17B12/PDHB/PPT1	9
BP	GO:0071616	acyl-CoA biosynthetic process	9/1199	45/18903	0.00179401	0.0223414	0.0183251	ACSL3/ACSL4/DLAT/DLD/ELOVL5/HACD2/HSD17B12/PDHB/PPT1	9
BP	GO:0098927	vesicle-mediated transport between endosomal compartments	9/1199	45/18903	0.00179401	0.0223414	0.0183251	CHMP3/HOOK1/MAP2K1/MAPK1/MSN/MTMR2/RAB21/RDX/SNX3	9
BP	GO:0048675	axon extension	17/1199	122/18903	0.00178982	0.0223414	0.0183251	ADNP/ALCAM/BMPR2/CTTN/DIP2B/GSK3B/HSP90AA1/HSP90AB1/ITGB1/MAP1B/PAFAH1B1/RAB21/RTN4/RYK/SHTN1/SLC9A6/VCL	17
BP	GO:1901989	positive regulation of cell cycle phase transition	17/1199	122/18903	0.00178982	0.0223414	0.0183251	AKT1/APP/CCND1/CDC27/CDC73/CDK1/CUL4B/DDX3X/MDM2/NPM1/RAB11A/RB1/RCC2/RDX/RRM2B/TFDP1/TMOD3	17
BP	GO:1902905	positive regulation of supramolecular fiber organization	22/1199	176/18903	0.0017839	0.0223414	0.0183251	ABI2/APP/ARF6/BRK1/CDC42/CFL2/CLASP1/CLIP1/CTTN/DSTN/MAP1B/MAPRE1/MET/NCKAP1/PFN2/RAC1/RB1/RHOA/RICTOR/ROCK2/TGFBR1/WASF1	22
BP	GO:0035601	protein deacylation	18/1199	133/18903	0.00186182	0.0230807	0.0189315	BAZ2A/DR1/ELK4/HDAC1/HDAC2/KDM5A/LYPLA1/MIER1/MORF4L1/MORF4L2/PPT1/PRKAA1/RBBP4/RBBP7/SMARCA5/SMARCAD1/SUDS3/TBL1XR1	18
BP	GO:1904950	negative regulation of establishment of protein localization	18/1199	133/18903	0.00186182	0.0230807	0.0189315	CHP1/DNAJA1/ERLEC1/F2R/GOPC/HMGCR/INSIG1/LMAN1/LYPLA1/NDFIP1/NDFIP2/OS9/PPP3CA/PTPN11/SNX3/SUMO1/UBE2J1/YOD1	18
BP	GO:0030834	regulation of actin filament depolymerization	10/1199	54/18903	0.0018786	0.0231836	0.0190159	ADD3/CAPZA1/CAPZA2/CFL2/DSTN/LIMA1/MTPN/RDX/TMOD3/TWF1	10
BP	GO:1902117	positive regulation of organelle assembly	13/1199	82/18903	0.00187664	0.0231836	0.0190159	CNOT1/CNOT6/FSCN1/G3BP1/G3BP2/GSK3B/MAPK9/MSN/PDCD6IP/RAB3GAP1/RHOA/SEPTIN7/SH3GLB1	13
BP	GO:0016575	histone deacetylation	15/1199	102/18903	0.00189806	0.0233709	0.0191696	BAZ2A/DR1/ELK4/HDAC1/HDAC2/KDM5A/MIER1/MORF4L1/MORF4L2/RBBP4/RBBP7/SMARCA5/SMARCAD1/SUDS3/TBL1XR1	15
BP	GO:0019827	stem cell population maintenance	22/1199	177/18903	0.00191822	0.0235661	0.0193297	ACTB/CDC73/CNOT1/CTNNB1/CTR9/HDAC1/HDAC2/KLF10/MED14/MED28/NCOA3/PHF10/RBBP4/RBBP7/RBPJ/SINHCAF/SMARCC1/SMC1A/SS18/SUDS3/TPT1/YAP1	22
BP	GO:2001022	positive regulation of response to DNA damage stimulus	21/1199	166/18903	0.00193182	0.02368	0.0194231	ACTB/ACTR2/BCLAF1/DDX5/DHX9/FMR1/HMGB1/INO80D/MORF4L1/MORF4L2/PBRM1/PHF10/PRKDC/SHLD2/SKIL/SLF2/SMARCC1/UBE2N/UBE2V2/UCHL5/USP1	21
BP	GO:0090150	establishment of protein localization to membrane	30/1199	270/18903	0.00201308	0.0246209	0.0201948	ACSL3/ARL6IP1/ATAD1/ATP2C1/ATP6AP1/CCDC47/CHM/CHP1/EMC10/GOLPH3/GOPC/HSP90AA1/LYPLA1/MMGT1/PIKFYVE/PREPL/PRNP/RAB10/RAB11A/RAB3GAP1/RDX/SEC62/SRP14/SRP72/SSR1/TOMM20/TRAM1/VAMP3/VPS35/ZDHHC9	30
BP	GO:0043462	regulation of ATP-dependent activity	12/1199	73/18903	0.0020195	0.0246442	0.020214	ATP1B3/C4orf3/DHX9/DNAJC10/GABARAPL2/HNRNPU/PFN2/SUMO1/TMEM64/TOR1AIP1/TOR1AIP2/VMA21	12
BP	GO:0031507	heterochromatin formation	13/1199	83/18903	0.00209872	0.0254971	0.0209136	ATF7IP/BAZ2A/CBX3/CTCF/CTR9/H1-0/H3-3B/HDAC1/HMGB1/LMNB2/RB1/SMARCA5/SPTY2D1	13
BP	GO:0048144	fibroblast proliferation	15/1199	103/18903	0.0020943	0.0254971	0.0209136	BMI1/BRK1/CDC73/CDK1/CDK6/CTNNB1/DHX9/FTH1/MORF4L1/PRDX1/PTGES3/RRN3/SOD2/TP53INP1/ZMPSTE24	15
BP	GO:0007019	microtubule depolymerization	9/1199	46/18903	0.002107	0.025541	0.0209496	APC/ATXN7/CAMSAP2/CCSAP/CLASP1/CLASP2/MAP1B/STMN1/TAOK1	9
BP	GO:0051893	regulation of focal adhesion assembly	11/1199	64/18903	0.00212589	0.0256561	0.021044	ACTG1/CLASP1/CLASP2/LIMS1/PEAK1/RAC1/RCC2/RHOA/ROCK1/ROCK2/VCL	11
BP	GO:0090109	regulation of cell-substrate junction assembly	11/1199	64/18903	0.00212589	0.0256561	0.021044	ACTG1/CLASP1/CLASP2/LIMS1/PEAK1/RAC1/RCC2/RHOA/ROCK1/ROCK2/VCL	11
BP	GO:0010761	fibroblast migration	10/1199	55/18903	0.00216798	0.0260491	0.0213663	AKAP12/AKT1/APPL1/GNA13/IQGAP1/ITGB1/RAC1/RCC2/SGPL1/ZFAND5	10
BP	GO:1902991	regulation of amyloid precursor protein catabolic process	10/1199	55/18903	0.00216798	0.0260491	0.0213663	FKBP1A/LYN/PICALM/PRNP/ROCK1/ROCK2/RTN3/RTN4/SP1/TMED10	10
BP	GO:0016055	Wnt signaling pathway	45/1199	456/18903	0.00217894	0.0261233	0.0214272	AMFR/APC/APP/ATP6AP2/CCND1/CCNY/CDC42/CDC73/CPE/CSNK1G3/CSNK2A1/CTNNB1/CTR9/DDX3X/FBXW11/G3BP1/GNAQ/GPC4/GSK3B/GSKIP/HDAC1/LRP6/PPM1A/PPP2CA/PRKAA1/RAC1/RBPJ/RHOA/RPS12/RYK/SCYL2/SMURF2/SNX3/SPIN1/STRN/TBL1XR1/TMEM64/TNKS/TNKS2/VGLL4/VPS35/WLS/XIAP/YAP1/ZBTB33	45
BP	GO:2000779	regulation of double-strand break repair	18/1199	135/18903	0.00220288	0.0263526	0.0216152	ACTB/ACTR2/DEK/KLHL15/MORF4L1/MORF4L2/NSD2/PBRM1/PHF10/PPP4R2/PPP4R3B/PRKDC/SHLD2/SLF2/SMARCC1/TRIP12/UBE2N/UBE2V2	18
BP	GO:0031333	negative regulation of protein-containing complex assembly	19/1199	146/18903	0.00223889	0.026725	0.0219207	ADD3/BIRC2/CAPZA1/CAPZA2/CDC42/DDX3X/FKBP4/GSK3B/HMGB1/MAPRE1/MTPN/PFN2/PPM1A/RDX/RIOK3/STMN1/TMOD3/TWF1/VPS35	19
BP	GO:1902914	regulation of protein polyubiquitination	7/1199	30/18903	0.00227281	0.0270279	0.0221692	BIRC2/DDX3X/MARCHF7/TRIP12/UBE2N/UBE2V2/XIAP	7
BP	GO:2000756	regulation of peptidyl-lysine acetylation	12/1199	74/18903	0.00227416	0.0270279	0.0221692	BAZ1B/CTCF/DDX21/DEK/DIP2B/HDAC2/PRKAA1/SET/SF3B1/SMARCA5/ZMPSTE24/ZNF451	12
BP	GO:0000041	transition metal ion transport	15/1199	104/18903	0.0023071	0.0273599	0.0224415	ATP2C1/B2M/CLTC/FKBP4/FTH1/IREB2/MMGT1/SFXN1/SLC30A1/SLC30A7/SLC30A9/SLC31A1/SLC39A14/SLC39A9/TFRC	15
BP	GO:0030323	respiratory tube development	23/1199	191/18903	0.00232507	0.0275134	0.0225674	ACVR2B/BMPR2/CDC42/CREB1/CTNNB1/DAG1/EPAS1/HECA/KRAS/LIPA/LTA4H/MAN1A2/MAN2A1/MAP2K1/MAPK1/PPP3R1/PTGES3/RBPJ/RC3H2/SELENON/SP3/YAP1/YWHAZ	23
BP	GO:0010921	regulation of phosphatase activity	13/1199	84/18903	0.00234197	0.0276535	0.0226823	CALM1/CHP1/FKBP1A/GSK3B/HSP90AB1/HSP90B1/MGAT5/PPP1R12A/PPP1R15B/PPP6R3/ROCK1/ROCK2/TIPRL	13
BP	GO:0009100	glycoprotein metabolic process	40/1199	395/18903	0.00235905	0.0277951	0.0227985	AGO2/AMFR/B3GALNT2/B3GNT5/BMPR2/BPNT2/C1GALT1/CHP1/CSGALNACT2/CTNNB1/EDEM3/GALNT1/GANAB/GFPT1/GLCE/GNPTAB/GOLPH3/GXYLT1/HIF1A/HS2ST1/HS6ST2/MAN1A1/MAN1A2/MAN2A1/MARCHF6/MGAT5/MLEC/NUS1/PGM3/POMK/RAB1A/RPN2/SERP1/SOAT1/STT3A/STT3B/TMEM59/TMTC3/UBE2J1/UGGT1	40
BP	GO:0198738	cell-cell signaling by wnt	45/1199	458/18903	0.00237065	0.0278717	0.0228613	AMFR/APC/APP/ATP6AP2/CCND1/CCNY/CDC42/CDC73/CPE/CSNK1G3/CSNK2A1/CTNNB1/CTR9/DDX3X/FBXW11/G3BP1/GNAQ/GPC4/GSK3B/GSKIP/HDAC1/LRP6/PPM1A/PPP2CA/PRKAA1/RAC1/RBPJ/RHOA/RPS12/RYK/SCYL2/SMURF2/SNX3/SPIN1/STRN/TBL1XR1/TMEM64/TNKS/TNKS2/VGLL4/VPS35/WLS/XIAP/YAP1/ZBTB33	45
BP	GO:0043401	steroid hormone mediated signaling pathway	18/1199	136/18903	0.00239215	0.0280642	0.0230192	CALR/CLOCK/CNOT1/DDX17/DDX5/DNAJA1/FKBP4/HDAC1/MED1/NCOA4/PTGES3/RBFOX2/RHOA/RNF14/RWDD1/TMF1/UBE3A/YAP1	18
BP	GO:0001885	endothelial cell development	11/1199	65/18903	0.00241524	0.0282139	0.023142	CLIC4/MET/MSN/RAP1A/RAP1B/RAP2C/RDX/ROCK1/ROCK2/VCL/VEZF1	11
BP	GO:0032507	maintenance of protein location in cell	11/1199	65/18903	0.00241524	0.0282139	0.023142	AKT1/ANKRD13C/ARL2BP/GOLPH3/HNRNPU/INSIG1/KDELR1/OS9/SKP1/SUN1/TWF1	11
BP	GO:0044409	entry into host	20/1199	158/18903	0.00242629	0.0282825	0.0231983	BSG/CBL/CD46/CD81/CDK1/CTSB/DAG1/EPS15/HMGB1/IDE/ITCH/ITGB1/KPNA3/LAMP1/PIKFYVE/RPSA/SCARB2/SNX3/TFRC/XPR1	20
BP	GO:0031054	pre-miRNA processing	5/1199	16/18903	0.00246637	0.0284465	0.0233327	ADAR/AGO1/AGO2/DICER1/TRUB1	5
BP	GO:0034085	establishment of sister chromatid cohesion	5/1199	16/18903	0.00246637	0.0284465	0.0233327	NAA50/RAD21/RB1/SMC1A/STAG2	5
BP	GO:1900044	regulation of protein K63-linked ubiquitination	5/1199	16/18903	0.00246637	0.0284465	0.0233327	BIRC2/DDX3X/TRIP12/UBE2N/UBE2V2	5
BP	GO:0045646	regulation of erythrocyte differentiation	9/1199	47/18903	0.00246198	0.0284465	0.0233327	ABCB10/B2M/CDK6/HIF1A/HSPA9/LYN/MED1/PRKDC/STAT1	9
BP	GO:1900368	regulation of post-transcriptional gene silencing by RNA	9/1199	47/18903	0.00246198	0.0284465	0.0233327	ADAR/DDX5/DHX9/FMR1/MAP2K1/PPP3CA/PUM2/TRUB1/ZMPSTE24	9
BP	GO:0042996	regulation of Golgi to plasma membrane protein transport	4/1199	10/18903	0.00248222	0.0284492	0.023335	ACSL3/ATP2C1/GOPC/LYPLA1	4
BP	GO:1902959	regulation of aspartic-type endopeptidase activity involved in amyloid precursor protein catabolic process	4/1199	10/18903	0.00248222	0.0284492	0.023335	LYN/PICALM/ROCK2/TMED10	4
BP	GO:2000601	positive regulation of Arp2/3 complex-mediated actin nucleation	4/1199	10/18903	0.00248222	0.0284492	0.023335	ABI2/BRK1/NCKAP1/WASF1	4
BP	GO:0042254	ribosome biogenesis	33/1199	310/18903	0.00249815	0.0285719	0.0234356	ABCE1/CUL4B/DDX17/DDX21/DDX3X/ERI1/GLUL/MTREX/NMD3/NOLC1/NPM1/PRKDC/RAN/RIOK3/RPL11/RPL27/RPL38/RPL5/RPL7/RPL7A/RPS16/RPS24/RPS25/RPS7/RPSA/RRN3/RSL24D1/SNU13/TENT4B/UTP23/WDR36/XPO1/XRCC5	33
BP	GO:0009615	response to virus	41/1199	409/18903	0.00252244	0.0287895	0.0236141	ADAR/AP1S1/ARF1/ATF2/BIRC2/BNIP3L/CALR/CDK6/CFL1/CHMP3/CNOT7/DDX17/DDX21/DDX3X/DHX15/DHX9/DNAJC3/EIF5A/FMR1/G3BP1/HIF1A/HNRNPUL1/HSP90AA1/ITCH/JAK1/LSM14A/ODC1/PDE12/PUM2/RIOK3/RPS15A/SAMHD1/SERINC3/STAT1/STMN1/TPT1/TSPAN6/XPR1/ZC3HAV1/ZMPSTE24/ZMYND11	41
BP	GO:0035518	histone H2A monoubiquitination	6/1199	23/18903	0.00254735	0.028953	0.0237482	BMI1/CUL4B/PCGF3/PCGF5/RYBP/SKP1	6
BP	GO:1902254	negative regulation of intrinsic apoptotic signaling pathway by p53 class mediator	6/1199	23/18903	0.00254735	0.028953	0.0237482	MARCHF7/MDM2/PTTG1IP/RRM2B/RRN3/TAF9B	6
BP	GO:0031032	actomyosin structure organization	24/1199	204/18903	0.00258089	0.0292733	0.0240109	ACTG1/ANLN/CDC42/CDC42BPA/CFL2/CLASP1/CLASP2/CNN3/ECT2/EPB41L2/ITGB1/MET/PAK2/PDCD6IP/PFN2/PRKAR1A/RAC1/RACGAP1/RHOA/ROCK1/ROCK2/STMN1/TGFBR1/TMOD3	24
BP	GO:0098732	macromolecule deacylation	18/1199	137/18903	0.00259486	0.0293101	0.0240411	BAZ2A/DR1/ELK4/HDAC1/HDAC2/KDM5A/LYPLA1/MIER1/MORF4L1/MORF4L2/PPT1/PRKAA1/RBBP4/RBBP7/SMARCA5/SMARCAD1/SUDS3/TBL1XR1	18
BP	GO:1903322	positive regulation of protein modification by small protein conjugation or removal	18/1199	137/18903	0.00259486	0.0293101	0.0240411	BIRC2/BMI1/DDX3X/FKBP1A/MAPK9/MARCHF7/NDFIP1/NDFIP2/NPM1/PSMD10/PTTG1IP/SKP1/UBA2/UBE2N/UBE2V2/UBE3A/UBQLN1/XIAP	18
BP	GO:0046916	cellular transition metal ion homeostasis	16/1199	116/18903	0.0026737	0.0301384	0.0247205	APP/ARF1/ATP6AP1/ATP6V1A/FTH1/HIF1A/IREB2/NCOA4/NDFIP1/PRNP/SLC30A1/SLC30A7/SLC30A9/SLC31A1/SLC39A14/TFRC	16
BP	GO:0042401	cellular biogenic amine biosynthetic process	8/1199	39/18903	0.00269626	0.0303302	0.0248778	AMD1/AZIN1/GCH1/OAZ1/OAZ2/ODC1/SMS/VPS35	8
BP	GO:0031114	regulation of microtubule depolymerization	7/1199	31/18903	0.00277737	0.0311145	0.0255212	APC/ATXN7/CAMSAP2/CLASP1/CLASP2/MAP1B/TAOK1	7
BP	GO:1902751	positive regulation of cell cycle G2/M phase transition	7/1199	31/18903	0.00277737	0.0311145	0.0255212	APP/CCND1/CDK1/NPM1/RAB11A/RCC2/RRM2B	7
BP	GO:0051017	actin filament bundle assembly	20/1199	160/18903	0.00281431	0.0314639	0.0258077	ACTG1/CALD1/CDC42/CLASP1/CLASP2/FSCN1/HSP90B1/LIMA1/MET/PAK2/PFN2/PLS1/PLS3/RAC1/RDX/RHOA/ROCK1/ROCK2/STMN1/TGFBR1	20
BP	GO:0009299	mRNA transcription	9/1199	48/18903	0.00286277	0.0318105	0.026092	ATF2/CREB1/DDX5/EPAS1/HIPK3/HLTF/MED1/NCBP2/TAF13	9
BP	GO:0010171	body morphogenesis	9/1199	48/18903	0.00286277	0.0318105	0.026092	ASPH/ATP6AP2/CLASP1/CLASP2/DAG1/PLEKHA1/PTPN11/RAB3GAP1/SGPL1	9
BP	GO:0060147	regulation of post-transcriptional gene silencing	9/1199	48/18903	0.00286277	0.0318105	0.026092	ADAR/DDX5/DHX9/FMR1/MAP2K1/PPP3CA/PUM2/TRUB1/ZMPSTE24	9
BP	GO:0048588	developmental cell growth	26/1199	229/18903	0.00288273	0.0319673	0.0262206	ADNP/ALCAM/APP/BMPR2/CTNNB1/CTTN/DIP2B/GSK3B/HSP90AA1/HSP90AB1/IQGAP1/ITGB1/MAP1B/MAP2K4/MEX3C/NIN/PAFAH1B1/PDLIM5/RAB21/RTN4/RYK/SHTN1/SLC9A6/SPAG9/VCL/WASF1	26
BP	GO:1990138	neuron projection extension	21/1199	172/18903	0.00298162	0.032997	0.0270652	ADNP/ALCAM/BMPR2/CTNNB1/CTTN/DIP2B/GSK3B/HSP90AA1/HSP90AB1/IQGAP1/ITGB1/MAP1B/PAFAH1B1/RAB21/RTN4/RYK/SHTN1/SLC9A6/SPAG9/VCL/WASF1	21
BP	GO:0045739	positive regulation of DNA repair	17/1199	128/18903	0.00300249	0.033127	0.0271719	ACTB/ACTR2/DHX9/HMGB1/INO80D/MORF4L1/MORF4L2/PBRM1/PHF10/PRKDC/SHLD2/SLF2/SMARCC1/UBE2N/UBE2V2/UCHL5/USP1	17
BP	GO:0002573	myeloid leukocyte differentiation	25/1199	218/18903	0.00300549	0.033127	0.0271719	APP/ATP6AP1/CD81/CDC42/CDK6/CREB1/CTNNB1/EIF2AK1/GLO1/IREB2/KLF10/LBR/LYN/MED1/NDFIP1/NOTCH2/OSTM1/PAFAH1B1/PPP3CA/RB1/RBPJ/SNX10/SP3/TFRC/TMEM64	25
BP	GO:0062207	regulation of pattern recognition receptor signaling pathway	15/1199	107/18903	0.00305559	0.033544	0.0275138	APPL1/BIRC2/DDX3X/ERBIN/HMGB1/LYN/OTUD4/PJA2/PUM2/RIOK3/RTN4/TSPAN6/UBQLN1/WDFY1/XIAP	15
BP	GO:0001890	placenta development	19/1199	150/18903	0.00304953	0.033544	0.0275138	AKT1/ASH1L/BIRC2/BIRC6/BMPR2/BSG/CTSB/EPAS1/GGNBP2/HIF1A/HSP90AB1/MAP2K1/MAPK1/MED1/NOTCH2/PRDX3/RBPJ/SP3/TMED2	19
BP	GO:0030522	intracellular receptor signaling pathway	29/1199	266/18903	0.00312881	0.0342789	0.0281167	BIRC2/CALR/CLOCK/CNOT1/DCBLD2/DDX17/DDX5/DNAJA1/ERBIN/FKBP4/HDAC1/ITCH/LSM14A/MED1/NCOA4/NR1D2/PRCP/PTGES3/PUM2/RBFOX2/RHOA/RIOK3/RNF14/RWDD1/TMF1/TSPAN6/UBE3A/XIAP/YAP1	29
BP	GO:0007097	nuclear migration	6/1199	24/18903	0.0032166	0.0344806	0.0282821	CDC42/FBXW11/LMNB2/PAFAH1B1/SUN1/SYNE2	6
BP	GO:0018279	protein N-linked glycosylation via asparagine	6/1199	24/18903	0.0032166	0.0344806	0.0282821	MGAT5/RPN2/STT3A/STT3B/UBE2J1/UGGT1	6
BP	GO:0036120	cellular response to platelet-derived growth factor stimulus	6/1199	24/18903	0.0032166	0.0344806	0.0282821	CBL/HDAC1/IQGAP1/RDX/SYAP1/YES1	6
BP	GO:1904666	regulation of ubiquitin protein ligase activity	6/1199	24/18903	0.0032166	0.0344806	0.0282821	RPL11/RPL37/RPL5/RPS20/RPS7/SKP1	6
BP	GO:2000637	positive regulation of miRNA-mediated gene silencing	6/1199	24/18903	0.0032166	0.0344806	0.0282821	DDX5/DHX9/FMR1/MAP2K1/PUM2/TRUB1	6
BP	GO:0000184	nuclear-transcribed mRNA catabolic process, nonsense-mediated decay	8/1199	40/18903	0.00318625	0.0344806	0.0282821	CASC3/DCP2/GSPT1/HNRNPAB/NCBP2/PABPC1/RBM8A/SMG1	8
BP	GO:0009309	amine biosynthetic process	8/1199	40/18903	0.00318625	0.0344806	0.0282821	AMD1/AZIN1/GCH1/OAZ1/OAZ2/ODC1/SMS/VPS35	8
BP	GO:0032506	cytokinetic process	8/1199	40/18903	0.00318625	0.0344806	0.0282821	ANLN/ARF1/CHMP2B/CHMP3/ECT2/PDCD6IP/RACGAP1/RHOA	8
BP	GO:0043001	Golgi to plasma membrane protein transport	8/1199	40/18903	0.00318625	0.0344806	0.0282821	ACSL3/ATP2C1/GOLPH3/GOPC/LYPLA1/PREPL/RAB10/VAMP3	8
BP	GO:0043297	apical junction assembly	12/1199	77/18903	0.00319929	0.0344806	0.0282821	APC/CTNNA1/ECT2/PAK2/PDCD6IP/PKN2/PRKACA/RHOA/ROCK1/ROCK2/STRN/VCL	12
BP	GO:2001251	negative regulation of chromosome organization	14/1199	97/18903	0.00315909	0.0344806	0.0282821	APC/ATRX/BAZ1B/DCP2/H3-3B/HNRNPA1/HNRNPC/HNRNPU/RAD21/SMARCA5/TENT4B/TNKS/TNKS2/TOP2A	14
BP	GO:0051224	negative regulation of protein transport	17/1199	129/18903	0.00325915	0.0348684	0.0286002	CHP1/ERLEC1/F2R/GOPC/HMGCR/INSIG1/LMAN1/LYPLA1/NDFIP1/NDFIP2/OS9/PPP3CA/PTPN11/SNX3/SUMO1/UBE2J1/YOD1	17
BP	GO:0046718	viral entry into host cell	19/1199	151/18903	0.00328659	0.0350934	0.0287847	BSG/CD46/CD81/CDK1/CTSB/DAG1/EPS15/HMGB1/IDE/ITCH/ITGB1/KPNA3/LAMP1/PIKFYVE/RPSA/SCARB2/SNX3/TFRC/XPR1	19
BP	GO:0051402	neuron apoptotic process	28/1199	255/18903	0.00329856	0.0351525	0.0288332	ADNP/APP/ATF2/CASP2/CCND1/CPEB4/CTNNB1/F2R/HIF1A/HIPK2/HSP90AB1/IL6ST/KRAS/LANCL1/MAP2K4/MCL1/OXR1/PPT1/PRNP/RB1/RHOA/ROCK1/SET/SNX6/SOD2/TMBIM6/TRIM2/XIAP	28
BP	GO:0019885	antigen processing and presentation of endogenous peptide antigen via MHC class I	5/1199	17/18903	0.00331336	0.0351983	0.0288708	B2M/HLA-A/HLA-B/HLA-C/IDE	5
BP	GO:0051051	negative regulation of transport	46/1199	479/18903	0.00331573	0.0351983	0.0288708	AKT1/APPL1/ARF6/ARFIP1/ARL6IP5/C4orf3/CALM1/CHP1/ERLEC1/F2R/FMR1/GOPC/HMGB1/HMGCR/INSIG1/LMAN1/LYPLA1/MAP1B/MTMR2/NDFIP1/NDFIP2/OAZ1/OAZ2/OS9/OXSR1/PACSIN2/PICALM/PPP3CA/PPP3R1/PTPN11/RAC1/RAP1A/RAP1B/SLC30A1/SNX3/SREBF2/SUMO1/TMBIM6/UBE2J1/UBQLN1/UBQLN2/UBR3/VAMP3/VPS35/WDR41/YOD1	46
BP	GO:0019882	antigen processing and presentation	15/1199	108/18903	0.00334553	0.0353772	0.0290175	ARL8B/B2M/CALR/HLA-A/HLA-B/HLA-C/IDE/LNPEP/PDIA3/PIKFYVE/RAB10/RAB4A/RAB5B/RAB6A/SAR1B	15
BP	GO:0090263	positive regulation of canonical Wnt signaling pathway	15/1199	108/18903	0.00334553	0.0353772	0.0290175	ATP6AP2/CSNK1G3/DDX3X/GSKIP/PPM1A/RBPJ/RPS12/SMURF2/TBL1XR1/TNKS/TNKS2/VPS35/WLS/XIAP/YAP1	15
BP	GO:0051642	centrosome localization	7/1199	32/18903	0.00336351	0.0354303	0.029061	DYNC1LI2/KIF5B/NIN/PAFAH1B1/RANBP2/SUN1/SYNE2	7
BP	GO:0060674	placenta blood vessel development	7/1199	32/18903	0.00336351	0.0354303	0.029061	AKT1/GGNBP2/MAP2K1/MAPK1/NOTCH2/RBPJ/TMED2	7
BP	GO:0018394	peptidyl-lysine acetylation	23/1199	197/18903	0.00344901	0.036261	0.0297424	ACTB/ATF2/ATXN7/BAZ1B/BMI1/CLOCK/CTCF/DDX21/DEK/DIP2B/DR1/HDAC2/MORF4L1/MORF4L2/NAA50/NCOA3/PHF20/PRKAA1/SET/SF3B1/SMARCA5/ZMPSTE24/ZNF451	23
BP	GO:0071383	cellular response to steroid hormone stimulus	24/1199	209/18903	0.00353676	0.0371123	0.0304407	ATP1A1/ATP2B1/BMI1/CALR/CLOCK/CNOT1/DDX17/DDX5/DNAJA1/FKBP4/HDAC1/HNRNPU/HSPA8/MED1/NCOA4/PTGES3/RBFOX2/RHOA/RNF14/RPS6KB1/RWDD1/TMF1/UBE3A/YAP1	24
BP	GO:0042274	ribosomal small subunit biogenesis	12/1199	78/18903	0.0035678	0.0372948	0.0305904	NPM1/PRKDC/RIOK3/RPL38/RPS16/RPS24/RPS25/RPS7/RPSA/SNU13/UTP23/XRCC5	12
BP	GO:0070897	transcription preinitiation complex assembly	12/1199	78/18903	0.0035678	0.0372948	0.0305904	ATF7IP/BAZ2A/CAND1/DR1/GTF2A1/HMGB1/MED1/MED14/MED23/MED28/RRN3/TAF13	12
BP	GO:0036490	regulation of translation in response to endoplasmic reticulum stress	4/1199	11/18903	0.00370597	0.0377995	0.0310044	DDX3X/DNAJC3/PPP1R15B/TMED2	4
BP	GO:0045793	positive regulation of cell size	4/1199	11/18903	0.00370597	0.0377995	0.0310044	HSP90AA1/HSP90AB1/RB1CC1/TMEM123	4
BP	GO:0060623	regulation of chromosome condensation	4/1199	11/18903	0.00370597	0.0377995	0.0310044	BAZ1B/H3-3B/SMARCA5/SMC4	4
BP	GO:0071394	cellular response to testosterone stimulus	4/1199	11/18903	0.00370597	0.0377995	0.0310044	MSN/NCOA4/ROCK2/RWDD1	4
BP	GO:0071803	positive regulation of podosome assembly	4/1199	11/18903	0.00370597	0.0377995	0.0310044	FSCN1/MAPK9/MSN/RHOA	4
BP	GO:0110011	regulation of basement membrane organization	4/1199	11/18903	0.00370597	0.0377995	0.0310044	CLASP1/CLASP2/DAG1/LAMC1	4
BP	GO:2000622	regulation of nuclear-transcribed mRNA catabolic process, nonsense-mediated decay	4/1199	11/18903	0.00370597	0.0377995	0.0310044	CASC3/HNRNPAB/PABPC1/RBM8A	4
BP	GO:0042306	regulation of protein import into nucleus	10/1199	59/18903	0.00370312	0.0377995	0.0310044	CDK1/CHP1/ECT2/HSP90AA1/HSP90AB1/NOLC1/NUP58/RAN/SUMO1/TARDBP	10
BP	GO:0051653	spindle localization	10/1199	59/18903	0.00370312	0.0377995	0.0310044	ACTR2/ACTR3/CFL1/CLASP1/CLASP2/FBXW11/ITGB1/MAP4/MAPRE1/PAFAH1B1	10
BP	GO:0072666	establishment of protein localization to vacuole	10/1199	59/18903	0.00370312	0.0377995	0.0310044	AP3M1/GNPTAB/HSPA8/LAMP2/NCOA4/SCARB2/SORT1/VPS36/VPS41/ZFYVE16	10
BP	GO:0071453	cellular response to oxygen levels	21/1199	175/18903	0.00366456	0.0377995	0.0310044	AKT1/ATF2/ATP6AP1/ATP6V1A/BNIP3L/CBL/CPEB4/DDAH1/EPAS1/ERO1A/HIF1A/HIPK2/HP1BP3/MDM2/NPEPPS/PRKAA1/RBPJ/ROCK2/SDHD/TMBIM6/UBQLN1	21
BP	GO:0071897	DNA biosynthetic process	23/1199	198/18903	0.00367474	0.0377995	0.0310044	BMPR2/CCT6A/CCT8/CTNNB1/DCP2/HNRNPA1/HNRNPA2B1/HNRNPC/HNRNPU/HSP90AA1/HSP90AB1/MAPK1/NEK7/PARM1/PARP4/PTGES3/RRM2B/TENT4B/TFDP1/TNKS/TNKS2/USP1/XRCC5	23
BP	GO:0051258	protein polymerization	30/1199	281/18903	0.00366106	0.0377995	0.0310044	ADD3/ARF6/ARPC5/CAMSAP2/CAPZA1/CAPZA2/CHMP3/CLASP1/CLASP2/CLIP1/COTL1/CTTN/FKBP4/HSP90AA1/MAP1B/MAPRE1/MET/MTPN/NCKAP1/NIN/PFN2/RAC1/RDX/RHOA/RICTOR/STMN1/TMOD3/TWF1/UBE2K/WASF1	30
BP	GO:0006418	tRNA aminoacylation for protein translation	8/1199	41/18903	0.00374268	0.0378911	0.0310795	DARS1/DARS2/EPRS1/IARS1/IARS2/LARS1/NARS1/WARS1	8
BP	GO:0051125	regulation of actin nucleation	8/1199	41/18903	0.00374268	0.0378911	0.0310795	ABI2/ARF1/ARFIP1/BRK1/GMFB/NCKAP1/WASF1/WASHC4	8
BP	GO:0060338	regulation of type I interferon-mediated signaling pathway	8/1199	41/18903	0.00374268	0.0378911	0.0310795	ADAR/CNOT7/LSM14A/PTPN1/PTPN11/SAMHD1/UBE2K/YTHDF3	8
BP	GO:0070884	regulation of calcineurin-NFAT signaling cascade	8/1199	41/18903	0.00374268	0.0378911	0.0310795	ATP2B4/CAMTA1/CHP1/GSK3B/PPP3CA/PPP3R1/PRNP/PTBP1	8
BP	GO:0042752	regulation of circadian rhythm	16/1199	120/18903	0.00377105	0.0379675	0.0311422	CDK1/CLOCK/FBXW11/GNAQ/GSK3B/KLF10/MAPK9/NR1D2/PPP1CB/PRKAA1/PRKDC/ROCK2/TARDBP/THRAP3/TOP2A/UBE3A	16
BP	GO:0007623	circadian rhythm	24/1199	210/18903	0.0037599	0.0379675	0.0311422	CDK1/CLOCK/CREB1/FBXW11/GFPT1/GNAQ/GSK3B/HDAC1/HDAC2/HNRNPU/HOMER1/KDM5A/KLF10/MAPK9/NR1D2/PPP1CB/PRKAA1/PRKDC/ROCK2/TARDBP/THRAP3/TOP1/TOP2A/UBE3A	24
BP	GO:0001701	in utero embryonic development	39/1199	393/18903	0.00376416	0.0379675	0.0311422	AKT1/ATF2/BIRC6/BMI1/BRK1/CAPN2/CNOT1/CTNNB1/CTR9/EPAS1/GABPA/GGNBP2/GNA13/HIF1A/ITGB1/KIDINS220/MAN2A1/MAP2K1/MAPK1/MATR3/MBNL1/MED1/MIB1/NOTCH2/PHF6/RBPJ/RCN1/RRN3/RTN4/SKIL/SLC30A1/SP3/TBL1XR1/TGFBR1/THOC2/TMED2/YAP1/YBX1/ZFAND5	39
BP	GO:0070997	neuron death	37/1199	368/18903	0.00378533	0.0380411	0.0312026	ADNP/AKT1/APP/ARL6IP5/ATF2/CAPN2/CASP2/CBL/CCND1/CHP1/CPEB4/CTNNB1/EIF2S1/F2R/GSK3B/HIF1A/HIPK2/HSP90AB1/IL6ST/KRAS/LANCL1/MAP2K4/MCL1/OXR1/PICALM/PPT1/PRNP/RB1/RHOA/ROCK1/SET/SNX6/SOD2/TMBIM6/TRIM2/VPS35/XIAP	37
BP	GO:0030324	lung development	22/1199	187/18903	0.00380358	0.0381544	0.0312955	ACVR2B/BMPR2/CDC42/CREB1/CTNNB1/DAG1/EPAS1/KRAS/LIPA/LTA4H/MAN1A2/MAN2A1/MAP2K1/MAPK1/PPP3R1/PTGES3/RBPJ/RC3H2/SELENON/SP3/YAP1/YWHAZ	22
BP	GO:0002066	columnar/cuboidal epithelial cell development	9/1199	50/18903	0.0038179	0.0381581	0.0312985	AKT1/C1GALT1/CDK6/CLOCK/GSK3B/HIF1A/IL6ST/YAP1/YIPF6	9
BP	GO:0060966	regulation of gene silencing by RNA	9/1199	50/18903	0.0038179	0.0381581	0.0312985	ADAR/DDX5/DHX9/FMR1/MAP2K1/PPP3CA/PUM2/TRUB1/ZMPSTE24	9
BP	GO:0033674	positive regulation of kinase activity	47/1199	496/18903	0.00389036	0.0388114	0.0318343	ABI1/ACVR2B/ADAM9/ADNP/AKT1/ATP2B4/BMPR2/CACUL1/CALM1/CCND1/CCNT1/CCNY/CD81/CDC42/COPS8/DAG1/DAZAP2/DDX3X/ECT2/HSP90AA1/HSP90AB1/IQGAP1/LYN/MAP2K1/MET/MOB1A/MOB1B/NPM1/OSBPL8/PAK2/PPP2CA/PRNP/PRRC1/PSMD10/PTPN1/RANBP2/RAP1A/RHOA/RICTOR/RPLP1/RYK/SYAP1/TAB2/TAOK1/TNFRSF10B/XRCC5/ZFP91	47
BP	GO:0006541	glutamine metabolic process	6/1199	25/18903	0.00400853	0.0393441	0.0322713	GFPT1/GLS/GLUD1/GLUL/PPAT/SLC38A1	6
BP	GO:0018196	peptidyl-asparagine modification	6/1199	25/18903	0.00400853	0.0393441	0.0322713	MGAT5/RPN2/STT3A/STT3B/UBE2J1/UGGT1	6
BP	GO:0035336	long-chain fatty-acyl-CoA metabolic process	6/1199	25/18903	0.00400853	0.0393441	0.0322713	ACSL3/ACSL4/ELOVL5/FAR1/HACD2/HSD17B12	6
BP	GO:0046039	GTP metabolic process	6/1199	25/18903	0.00400853	0.0393441	0.0322713	AK3/GNAI3/OPA1/RAN/RHOA/RHOQ	6
BP	GO:0046949	fatty-acyl-CoA biosynthetic process	6/1199	25/18903	0.00400853	0.0393441	0.0322713	ACSL3/ACSL4/ELOVL5/HACD2/HSD17B12/PPT1	6
BP	GO:0060148	positive regulation of post-transcriptional gene silencing	6/1199	25/18903	0.00400853	0.0393441	0.0322713	DDX5/DHX9/FMR1/MAP2K1/PUM2/TRUB1	6
BP	GO:1900370	positive regulation of post-transcriptional gene silencing by RNA	6/1199	25/18903	0.00400853	0.0393441	0.0322713	DDX5/DHX9/FMR1/MAP2K1/PUM2/TRUB1	6
BP	GO:1903077	negative regulation of protein localization to plasma membrane	6/1199	25/18903	0.00400853	0.0393441	0.0322713	CLTC/GOPC/LYPLA1/PICALM/RHOQ/TMEM59	6
BP	GO:0000045	autophagosome assembly	15/1199	110/18903	0.00399325	0.0393441	0.0322713	ATP2A2/GABARAPL2/LRBA/MAP1LC3B/PIKFYVE/RAB1A/RAB3GAP1/RB1CC1/SEC22B/SH3GLB1/STX12/TMEM41B/TP53INP1/UBQLN1/UBQLN2	15
BP	GO:0045860	positive regulation of protein kinase activity	41/1199	420/18903	0.0040402	0.0395838	0.0324679	ABI1/ACVR2B/ADAM9/ADNP/AKT1/ATP2B4/BMPR2/CACUL1/CALM1/CCND1/CCNT1/CCNY/COPS8/DAG1/DAZAP2/DDX3X/ECT2/HSP90AA1/HSP90AB1/IQGAP1/MAP2K1/MOB1A/MOB1B/NPM1/OSBPL8/PAK2/PPP2CA/PRNP/PRRC1/PSMD10/PTPN1/RAP1A/RHOA/RICTOR/RPLP1/SYAP1/TAB2/TAOK1/TNFRSF10B/XRCC5/ZFP91	41
BP	GO:0008654	phospholipid biosynthetic process	28/1199	259/18903	0.0041037	0.0401341	0.0329193	ACSL3/AGPAT5/BPNT2/CAPN2/CDS2/CHP1/EFR3A/ETNK1/FADS1/FAR1/HMGCS1/IDI1/LPGAT1/MTMR2/NUS1/PI4K2B/PIK3C2A/PIKFYVE/PTDSS1/SACM1L/SAMD8/SELENOI/SERINC1/SGMS2/SLC44A1/SMG1/SOCS4/SPTLC1	28
BP	GO:0030316	osteoclast differentiation	14/1199	100/18903	0.0041868	0.0408736	0.0335258	ATP6AP1/CD81/CREB1/CTNNB1/GLO1/IREB2/KLF10/NOTCH2/OSTM1/PAFAH1B1/PPP3CA/SNX10/TFRC/TMEM64	14
BP	GO:0006998	nuclear envelope organization	10/1199	60/18903	0.00419674	0.0408976	0.0335455	CHMP2B/CHMP3/LEMD3/LMNB2/PAFAH1B1/SUN1/TARDBP/TOR1AIP1/UBE2I/ZMPSTE24	10
BP	GO:0006282	regulation of DNA repair	24/1199	212/18903	0.00424173	0.0412625	0.0338448	ACTB/ACTR2/ATXN7/DEK/DHX9/HMGB1/INO80D/KLHL15/MORF4L1/MORF4L2/NSD2/PBRM1/PHF10/PPP4R2/PPP4R3B/PRKDC/SHLD2/SLF2/SMARCC1/TRIP12/UBE2N/UBE2V2/UCHL5/USP1	24
BP	GO:0009101	glycoprotein biosynthetic process	33/1199	321/18903	0.00430397	0.0417936	0.0342804	AGO2/B3GALNT2/B3GNT5/BMPR2/C1GALT1/CHP1/CSGALNACT2/CTNNB1/EDEM3/GALNT1/GFPT1/GLCE/GOLPH3/GXYLT1/HS2ST1/HS6ST2/MAN1A1/MAN1A2/MAN2A1/MGAT5/MLEC/NUS1/PGM3/POMK/RPN2/SERP1/SOAT1/STT3A/STT3B/TMEM59/TMTC3/UBE2J1/UGGT1	33
BP	GO:0036499	PERK-mediated unfolded protein response	5/1199	18/18903	0.00435095	0.0419517	0.0344101	EIF2S1/PPP1R15B/PTPN1/TMED2/TMEM33	5
BP	GO:0045945	positive regulation of transcription by RNA polymerase III	5/1199	18/18903	0.00435095	0.0419517	0.0344101	BAZ1B/DDX21/DEK/SF3B1/SMARCA5	5
BP	GO:0046827	positive regulation of protein export from nucleus	5/1199	18/18903	0.00435095	0.0419517	0.0344101	CTDSPL2/GSK3B/PPM1A/PRKACA/XPO4	5
BP	GO:0042692	muscle cell differentiation	40/1199	409/18903	0.00433816	0.0419517	0.0344101	ACADM/ACTG1/AKT1/ATP2A2/BMPR2/CALR/CAPN2/CD81/CDK1/CFL2/CTNNB1/FRS2/H3-3B/HNRNPU/HOMER1/ITGB1/KRAS/LAMC1/MAP2K4/MDM2/MED28/MORF4L2/MRTFB/MTPN/PDLIM5/PPP3CA/PRKAR1A/PTBP1/PTGFRN/QKI/RB1/RBPJ/SELENON/SOD2/SORT1/SPAG9/TMOD3/XBP1/YBX1/ZMPSTE24	40
BP	GO:0106056	regulation of calcineurin-mediated signaling	8/1199	42/18903	0.00437129	0.0420737	0.0345102	ATP2B4/CAMTA1/CHP1/GSK3B/PPP3CA/PPP3R1/PRNP/PTBP1	8
BP	GO:1901985	positive regulation of protein acetylation	9/1199	51/18903	0.00438062	0.0420893	0.034523	BAZ1B/DDX21/DDX3X/DEK/DIP2B/PRKAA1/SF3B1/SMARCA5/TAOK1	9
BP	GO:0009306	protein secretion	36/1199	359/18903	0.00443152	0.0425037	0.0348629	ACSL4/ACVR2B/ADAM9/AP1S1/ARF6/ARFIP1/BLOC1S6/CANX/CCDC186/CD2AP/CLOCK/ENSA/F2R/GLUD1/GLUL/GNPTAB/GOLPH3/HIF1A/HMGCR/PAFAH1B1/PAM/PPP3CA/PTPN11/RAB10/RAB11FIP2/RAB12/SEC24A/SEL1L/SERP1/SLC16A1/TM7SF3/TMED10/TMEM167A/TVP23B/VPS35/WLS	36
BP	GO:0006476	protein deacetylation	16/1199	122/18903	0.00444477	0.0425562	0.034906	BAZ2A/DR1/ELK4/HDAC1/HDAC2/KDM5A/MIER1/MORF4L1/MORF4L2/PRKAA1/RBBP4/RBBP7/SMARCA5/SMARCAD1/SUDS3/TBL1XR1	16
BP	GO:0030177	positive regulation of Wnt signaling pathway	18/1199	144/18903	0.00445366	0.0425667	0.0349146	ATP6AP2/CDC73/CSNK1G3/CSNK2A1/DDX3X/GSKIP/PPM1A/RBPJ/RPS12/SMURF2/SPIN1/TBL1XR1/TNKS/TNKS2/VPS35/WLS/XIAP/YAP1	18
BP	GO:0150115	cell-substrate junction organization	14/1199	101/18903	0.00458417	0.0437376	0.035875	ACTG1/ARF6/CLASP1/CLASP2/CTTN/LAMC1/LIMS1/PEAK1/RAC1/RCC2/RHOA/ROCK1/ROCK2/VCL	14
BP	GO:0030307	positive regulation of cell growth	20/1199	167/18903	0.00460528	0.0438625	0.0359774	ADNP/AKT1/BMPR2/CDC42/CSNK2A1/DDX3X/EIF4G2/H3-3B/MAP1B/MTPN/PAFAH1B1/PSMD10/RHOA/RICTOR/RPS6KA3/SHTN1/TAF9B/TEAD1/TGFBR1/YAP1	20
BP	GO:0035592	establishment of protein localization to extracellular region	36/1199	360/18903	0.00463279	0.0440477	0.0361294	ACSL4/ACVR2B/ADAM9/AP1S1/ARF6/ARFIP1/BLOC1S6/CANX/CCDC186/CD2AP/CLOCK/ENSA/F2R/GLUD1/GLUL/GNPTAB/GOLPH3/HIF1A/HMGCR/PAFAH1B1/PAM/PPP3CA/PTPN11/RAB10/RAB11FIP2/RAB12/SEC24A/SEL1L/SERP1/SLC16A1/TM7SF3/TMED10/TMEM167A/TVP23B/VPS35/WLS	36
BP	GO:0000289	nuclear-transcribed mRNA poly(A) tail shortening	7/1199	34/18903	0.00481318	0.0455525	0.0373637	AGO2/CNOT1/CNOT6/CNOT7/PABPC1/SAMD4B/TENT4B	7
BP	GO:1901797	negative regulation of signal transduction by p53 class mediator	7/1199	34/18903	0.00481318	0.0455525	0.0373637	MARCHF7/MDM2/PSMD10/PTTG1IP/RRM2B/RRN3/TAF9B	7
BP	GO:0051651	maintenance of location in cell	25/1199	226/18903	0.00481605	0.0455525	0.0373637	AKT1/ANKRD13C/ARL2BP/CALM1/CALR/ERO1A/F2R/FKBP1A/FTH1/GM2A/GOLPH3/HNRNPU/HSP90B1/IBTK/INSIG1/KDELR1/LYN/OS9/PAFAH1B1/PRKACA/SELENON/SKP1/SLC30A7/SUN1/TWF1	25
BP	GO:0032515	negative regulation of phosphoprotein phosphatase activity	6/1199	26/18903	0.0049359	0.0460487	0.0377706	FKBP1A/GSK3B/MGAT5/ROCK1/ROCK2/TIPRL	6
BP	GO:0034643	establishment of mitochondrion localization, microtubule-mediated	6/1199	26/18903	0.0049359	0.0460487	0.0377706	HIF1A/HSBP1/MAP1B/OPA1/RHOT1/WASF1	6
BP	GO:0036119	response to platelet-derived growth factor	6/1199	26/18903	0.0049359	0.0460487	0.0377706	CBL/HDAC1/IQGAP1/RDX/SYAP1/YES1	6
BP	GO:0047497	mitochondrion transport along microtubule	6/1199	26/18903	0.0049359	0.0460487	0.0377706	HIF1A/HSBP1/MAP1B/OPA1/RHOT1/WASF1	6
BP	GO:0048026	positive regulation of mRNA splicing, via spliceosome	6/1199	26/18903	0.0049359	0.0460487	0.0377706	HSPA8/PRDX6/RBMX/SF3B4/THRAP3/TRA2B	6
BP	GO:0051016	barbed-end actin filament capping	6/1199	26/18903	0.0049359	0.0460487	0.0377706	ADD3/CAPZA1/CAPZA2/MTPN/RDX/TWF1	6
BP	GO:1902455	negative regulation of stem cell population maintenance	6/1199	26/18903	0.0049359	0.0460487	0.0377706	HDAC1/HDAC2/RBBP4/RBBP7/SINHCAF/SUDS3	6
BP	GO:0099518	vesicle cytoskeletal trafficking	11/1199	71/18903	0.00488866	0.0460487	0.0377706	AP3M1/AP3S1/BLOC1S6/CCDC186/FBXW11/FNBP1L/KIF3A/KIF5B/MYO6/PAFAH1B1/RAB1A	11
BP	GO:0006367	transcription initiation at RNA polymerase II promoter	14/1199	102/18903	0.00501151	0.0466745	0.0382839	ATF7IP/CAND1/DR1/E2F3/GTF2A1/HMGB1/MED1/MED13/MED14/MED23/MED28/SUB1/TAF13/ZNF451	14
BP	GO:0044839	cell cycle G2/M phase transition	19/1199	157/18903	0.00505326	0.0469832	0.0385372	APP/ARPP19/BACH1/CALM1/CCND1/CCNG1/CCNY/CDK1/ENSA/FHL1/KHDRBS1/MACROH2A1/NPM1/RAB11A/RAD21/RCC2/RRM2B/TAOK1/TOPBP1	19
BP	GO:0090148	membrane fission	8/1199	43/18903	0.005078	0.0471332	0.0386602	CHMP2B/CHMP3/EXOC4/EXOC5/EXOC8/SH3GLB1/SLC25A46/VPS36	8
BP	GO:0031123	RNA 3'-end processing	15/1199	113/18903	0.00515355	0.0477533	0.0391688	AHCYL1/APP/CDC73/ERI1/GRSF1/NCBP2/NUDT21/PABPC1/PAPOLA/RPRD1A/SLBP/SSB/TENT4B/VIRMA/ZC3H14	15
BP	GO:0001731	formation of translation preinitiation complex	4/1199	12/18903	0.00528219	0.0478108	0.039216	DENR/EIF2S3/EIF4B/EIF4H	4
BP	GO:0001967	suckling behavior	4/1199	12/18903	0.00528219	0.0478108	0.039216	APP/GLS/PEX13/UBR3	4
BP	GO:0006983	ER overload response	4/1199	12/18903	0.00528219	0.0478108	0.039216	CCDC47/GSK3B/PPP1R15B/TMCO1	4
BP	GO:0008298	intracellular mRNA localization	4/1199	12/18903	0.00528219	0.0478108	0.039216	CASC3/FUBP3/HNRNPAB/STAU1	4
BP	GO:0033327	Leydig cell differentiation	4/1199	12/18903	0.00528219	0.0478108	0.039216	CCND1/PLEKHA1/SGPL1/TMF1	4
BP	GO:0046929	negative regulation of neurotransmitter secretion	4/1199	12/18903	0.00528219	0.0478108	0.039216	FMR1/RAP1A/RAP1B/SLC30A1	4
BP	GO:0060788	ectodermal placode formation	4/1199	12/18903	0.00528219	0.0478108	0.039216	CTNNB1/FRS2/HDAC1/HDAC2	4
BP	GO:0071697	ectodermal placode morphogenesis	4/1199	12/18903	0.00528219	0.0478108	0.039216	CTNNB1/FRS2/HDAC1/HDAC2	4
BP	GO:0099010	modification of postsynaptic structure	4/1199	12/18903	0.00528219	0.0478108	0.039216	PFN2/RHOA/STAU1/WASF1	4
BP	GO:1901142	insulin metabolic process	4/1199	12/18903	0.00528219	0.0478108	0.039216	CPE/ERO1A/IDE/YIPF5	4
BP	GO:1905245	regulation of aspartic-type peptidase activity	4/1199	12/18903	0.00528219	0.0478108	0.039216	LYN/PICALM/ROCK2/TMED10	4
BP	GO:0032273	positive regulation of protein polymerization	13/1199	92/18903	0.00524	0.0478108	0.039216	ARF6/CLASP1/CLIP1/CTTN/HSP90AA1/MAP1B/MAPRE1/MET/NCKAP1/PFN2/RAC1/RHOA/RICTOR	13
BP	GO:0031109	microtubule polymerization or depolymerization	16/1199	124/18903	0.00521374	0.0478108	0.039216	APC/ATXN7/CAMSAP2/CCSAP/CLASP1/CLASP2/CLIP1/FKBP4/MAP1B/MAPRE1/MET/NIN/RAC1/SKA2/STMN1/TAOK1	16
BP	GO:0009755	hormone-mediated signaling pathway	22/1199	192/18903	0.00521584	0.0478108	0.039216	APPL1/CALR/CLOCK/CNOT1/DDX17/DDX5/DNAJA1/FKBP4/HDAC1/MED1/NCOA4/NR1D2/PRCP/PTGES3/PTPN11/RBFOX2/RHOA/RNF14/RWDD1/TMF1/UBE3A/YAP1	22
BP	GO:0018205	peptidyl-lysine modification	40/1199	414/18903	0.00532597	0.0481274	0.0394757	ACTB/ASH1L/ATF2/ATRX/ATXN7/BAZ1B/BMI1/CLOCK/CTCF/CTNNB1/CTR9/DDX21/DEK/DIP2B/DR1/HDAC2/KIAA1586/MACROH2A1/MDM2/MORF4L1/MORF4L2/NAA50/NCOA3/NSD2/PHF20/PLOD2/PRKAA1/RANBP2/SET/SETD7/SF3B1/SLF2/SMARCA5/SUMO1/SUMO2/UBA2/UBE2I/WDR82/ZMPSTE24/ZNF451	40
BP	GO:2000736	regulation of stem cell differentiation	12/1199	82/18903	0.00539791	0.048697	0.0399429	CDK6/GSK3B/HDAC1/HDAC2/HNRNPU/HSPA9/ITCH/NUDT21/PRKDC/RBBP4/RBBP7/YAP1	12
BP	GO:0002483	antigen processing and presentation of endogenous peptide antigen	5/1199	19/18903	0.00560064	0.0498676	0.040903	B2M/HLA-A/HLA-B/HLA-C/IDE	5
BP	GO:0035338	long-chain fatty-acyl-CoA biosynthetic process	5/1199	19/18903	0.00560064	0.0498676	0.040903	ACSL3/ACSL4/ELOVL5/HACD2/HSD17B12	5
BP	GO:0045947	negative regulation of translational initiation	5/1199	19/18903	0.00560064	0.0498676	0.040903	AGO2/EIF2AK1/EIF2S1/EIF4EBP2/FMR1	5
BP	GO:0055070	copper ion homeostasis	5/1199	19/18903	0.00560064	0.0498676	0.040903	APP/ARF1/PRNP/SLC31A1/XIAP	5
BP	GO:0060216	definitive hemopoiesis	5/1199	19/18903	0.00560064	0.0498676	0.040903	ADAR/CBFB/HIPK1/HOXA9/SP3	5
BP	GO:0097284	hepatocyte apoptotic process	5/1199	19/18903	0.00560064	0.0498676	0.040903	ADAR/ARF6/ATF2/PRKAA1/RB1	5
BP	GO:0099563	modification of synaptic structure	5/1199	19/18903	0.00560064	0.0498676	0.040903	CDC42/PFN2/RHOA/STAU1/WASF1	5
BP	GO:2000434	regulation of protein neddylation	5/1199	19/18903	0.00560064	0.0498676	0.040903	COPS8/EPAS1/HIF1A/RPL11/RPL5	5
