# Supplementary material for: Systematic characterization of the composition and dynamics of processing body-associated mRNAs
Source: Research Square preprint supplement (doi:10.21203/rs.3.rs-5354706/v1), 2024-12-04
Supplement: Supplementary file 16 [file Supplementary Table 7.xlsx]

## Sheet: Sheet 1
Table 7: Translation efficiency of each mRNA in WT and DDX6-KO cells
Gene_name	Log2 TE in WT HCT116 cells	Log2 TE in DDX6-KO HCT116 cells	Log2 TE in WT HEK293T cells	Log2 TE in DDX6-KO HEK293T cells
5_8S_rRNA	0	0	0	0
5S_rRNA	0	0	0.083083	-0.298064
7SK	0	0	0	0
A1BG	0.0230017	-0.0121294	0.0631356	-0.0674713
A1BG-AS1	0.123032	0.0951361	0.42631	0.446788
A1CF	-0.0136495	0.0123971	0.0180719	-0.0102609
A2M	0.0164091	-0.03253	0.163625	0.0129951
A2M-AS1	-0.026376	0.14381	0.154921	0.371645
A2ML1	0	0.0306246	0.0123988	-0.0151536
A2ML1-AS1	0	0	0	0
A2ML1-AS2	0	0	0	0
A2MP1	0	0	0.0377698	0
A3GALT2	0	0	0.345971	0.781007
A4GALT	0.547915	0.773605	0.453825	0.232755
A4GNT	0	0.0617264	0.00465272	0
AA06	0	0	0	0
AAAS	0.0427055	0.27113	-0.924481	-0.7578
AACS	-0.103821	0.0301756	-1.08987	-1.10702
AACSP1	-0.219834	-0.181207	0	0.0191442
AADAC	-0.0566053	0.0691178	-0.223155	0
AADACL2	0	0	0	0
AADACL2-AS1	0	0	0	0
AADACL3	0	0	0	0
AADACL4	0	0	-0.0454963	0
AADACP1	0.271895	0.323672	0	0.0788917
AADAT	-0.314349	0.360075	0.883929	1.33642
AAGAB	0.38474	1.05055	-0.124276	0.299474
AAK1	-0.655368	-0.509288	0.129683	0.27954
AAMDC	1.61961	1.14644	0.864998	0.872348
AAMP	0.973913	0.801113	0.176416	0.149466
AANAT	0.393033	0.364772	0.846759	-0.218454
AAR2	0.233446	0.398043	-0.512593	-0.460233
AARD	0	0	0.0114498	0.641931
AARS1	-1.45038	-1.07951	-2.17966	-2.50429
AARS1P1	0	0	0	0
AARS2	-0.117331	0.250858	-1.27296	-1.41927
AARSD1	0.0371635	-0.120824	-0.0498802	-0.226122
AARSD1P1	-0.0787685	-0.0853517	0.146455	0.0212071
AASDH	-0.122704	-0.0892069	0.891131	1.34894
AASDHPPT	-0.676982	-0.0135464	1.82107	2.08657
AASS	0.061252	-0.00733605	0.481394	0.474537
AATBC	0	0	0	0.0605225
AATF	-0.744037	0.163796	-1.43403	-1.28789
AATK	0.553124	0.309193	0.519706	0.0651222
ABALON	0.0257053	0.282428	-0.22722	-0.229161
ABAT	-0.261698	0.109989	-0.0523969	-0.0263686
ABBA01000933.1	0	0	0	0
ABBA01000935.2	0	0	0	0
ABBA01006766.1	0	0	0	0
ABBA01045074.1	-0.383739	0	0	0
ABBA01045074.2	0	0	0	0
ABCA1	-0.0250895	0	0.158535	0.129382
ABCA10	0.0218963	0	0.0208394	0.0969312
ABCA11P	-0.125395	0.00613818	0.592404	0.737078
ABCA12	-0.201563	-0.0214601	-0.0341724	-0.00191557
ABCA13	0.0048527	-0.00434789	0.0142568	0.00677417
ABCA17P	0.194338	0.370875	0.471997	0.420077
ABCA2	0.435831	0.532477	0.187183	-0.383692
ABCA3	0.228022	0.144473	-0.405364	-0.616947
ABCA4	-0.066334	0.0289244	0.0373558	0.00517128
ABCA5	-0.0941685	-0.113275	0.714169	1.25032
ABCA6	0	0.0541157	0.00628016	0.00639797
ABCA7	0.355472	0.334932	0.319938	-0.0910459
ABCA8	-0.00696091	0	-0.000210828	0.116233
ABCA9	0	0	0.00887854	0.00567968
ABCA9-AS1	0	0	0	0
ABCB1	-0.234651	-0.29823	-0.466569	-0.228421
ABCB10	-1.70698	-0.763923	1.57573	1.93064
ABCB10P1	0	0	0	0
ABCB10P3	0	0	0	0
ABCB10P4	0	0	0	0
ABCB11	-0.0123505	0	0.0112738	0.000427595
ABCB4	0	0.0144453	0.0852806	-0.0338174
ABCB5	0	-0.00986834	0.0828551	0.0045271
ABCB6	-0.112549	0.076445	-0.311278	-0.190457
ABCB7	-0.767074	0.0376874	-0.801763	-0.237997
ABCB8	0.251347	0.345466	-0.137042	-0.401222
ABCB9	0.484847	0.508749	0.0826839	-0.216247
ABCC1	-0.969758	-0.439514	-1.55534	-1.68091
ABCC10	0.209058	0.260567	-0.350046	-0.659744
ABCC11	-0.114276	-0.0712582	0.0057806	-0.0866961
ABCC12	0	0.0125008	0.0201118	0.00515404
ABCC13	0	0	0.00828695	0
ABCC2	-1.47556	-0.281266	0.327704	0.242655
ABCC3	0.0776806	0.0709164	-0.00977617	-0.0207326
ABCC4	-1.48037	-0.642722	-0.203316	0.368155
ABCC5	-0.208138	0.00863329	-0.528924	-0.70725
ABCC5-AS1	0	0	0	0
ABCC6	0.477948	0.202267	0.361432	0.0869023
ABCC6P1	0.0167728	-0.0264722	0.241836	0.541588
ABCC6P2	0.767656	0	0.856114	0.346087
ABCC8	0.0315949	0.0257969	0.123532	0.0563421
ABCC9	0	0	0.0601695	0.00667808
ABCD1	0.570428	0.513002	-0.109833	-0.470527
ABCD1P2	0	0	0	0
ABCD1P3	0	0	0	0
ABCD1P4	0	0	0	0
ABCD1P5	0	0	0	0
ABCD2	-0.0151338	0	0.0943081	-0.000916534
ABCD3	-0.623728	-0.640169	0.485958	1.30484
ABCD4	0.345379	0.715287	0.0659867	0.045201
ABCE1	-2.10098	-1.49674	1.07484	1.94603
ABCF1	-1.47335	-0.608456	-1.58523	-1.54482
ABCF2	-0.491252	-0.0347678	-1.35025	-1.34859
ABCF2-H2BE1	0	0	0.039419	-0.0877879
ABCF2P1	0	0	0	0
ABCF2P2	0	0	0	0
ABCF3	-0.42763	-0.388625	-1.09505	-1.02283
ABCG1	0.378092	0.181317	-0.639632	-0.583887
ABCG2	-0.25304	0.58238	-0.117543	-0.264908
ABCG4	0.232877	0.274723	0.174482	-0.0878653
ABCG5	0	0	-0.125265	0.0486102
ABCG8	0	-0.0190886	0.0417259	0.0284824
ABHD1	0.0232099	-0.0196633	0.231155	-0.01943
ABHD10	0.420695	0.736692	0.536111	0.975171
ABHD11	0.626535	0.507839	0.0187341	0.0404393
ABHD11-AS1	0.256815	0.531613	0.185065	0.0851513
ABHD12	0.719489	0.62658	0.401193	0.297369
ABHD12B	-0.0579355	0.00379881	-0.0172059	0
ABHD13	0.356173	0.705014	1.12202	1.5097
ABHD14A	0.773112	0.892805	0.762414	0.768198
ABHD14A-ACY1	-0.129486	0.112105	0.10965	-0.0983358
ABHD14B	0.696341	0.752547	0.326888	0.125571
ABHD15	0.158446	0.978499	0.39559	-0.153013
ABHD15-AS1	0	0	0	-0.393144
ABHD16A	0.589015	0.404046	-0.0355969	0.104425
ABHD16B	0.0708862	-0.0680731	0.0525312	0.0917015
ABHD17A	0.84862	0.836312	0.448796	0.110394
ABHD17AP1	0.414668	0.483627	0.749991	0.249577
ABHD17AP3	-0.0674163	-0.130605	0.147378	0.136796
ABHD17AP4	0	0	0	0
ABHD17AP5	0	0	0	0.0793744
ABHD17AP6	0.193009	0.0157621	0.318676	0.27354
ABHD17AP7	0	0	0	0
ABHD17AP8	0	0	0	0
ABHD17AP9	0	0	0	0
ABHD17B	-1.03439	-0.72761	0.617906	0.918314
ABHD17C	-0.846199	0.622922	0.682574	0.573672
ABHD18	-0.101399	-0.0606112	1.3044	1.21062
ABHD2	-1.19352	-0.18924	-0.283552	-0.114114
ABHD3	-0.558421	0.18062	0.993674	1.33293
ABHD4	0.301736	0.469563	-0.114794	-0.0892178
ABHD5	0.470825	0.918749	0.371439	0.729602
ABHD6	0.182289	0.783309	0.182227	0.479443
ABHD8	0.675095	0.644083	0.415425	0.299722
ABI1	-0.583359	0.325827	0.652307	0.781158
ABI1P1	0	0	0	0
ABI2	-0.247837	0.212296	0.955715	1.20599
ABI3	-0.114488	0.0472875	0.297652	0.142004
ABI3BP	0.0196022	-0.0252863	-0.0210068	0.0665721
ABITRAM	-0.983214	-0.574333	1.85643	2.28277
ABITRAMP1	0	0	0	0
ABL1	0.274943	0.657253	-0.327526	-0.485011
ABL2	-0.645938	-0.225668	0.35731	0.722311
ABLIM1	-0.88562	0.136508	0.612204	0.997701
ABLIM2	0.545749	0.430349	0.0633907	-0.228152
ABLIM3	-0.520296	-0.196801	-0.263602	-0.162709
ABO	0.114872	0.161691	0.0237964	0.0103091
ABR	-0.0338473	0.368243	-0.538666	-0.649526
ABRA	0	0	0.0319985	0
ABRACL	1.47714	1.62085	1.30949	1.4581
ABRAXAS1	-0.2717	-0.185026	0.794047	0.747477
ABRAXAS2	-1.37088	-0.561886	1.03985	1.49612
ABT1	0.997397	0.976981	0.390528	0.513488
ABT1P1	0	0	0.198419	0
ABTB1	0.595791	0.536609	0.0858124	-0.0212873
ABTB2	0.0161385	0.497895	-0.730624	-0.935999
AC000032.1	0	0	0	0
AC000035.1	0	0	0	-0.262834
AC000036.1	0	0	0	0
AC000041.1	0	0	0	0
AC000050.1	0	0	0	0
AC000058.1	0	0	0	0
AC000061.1	0	0	0	0
AC000065.1	0	0	0	0
AC000065.2	0	0	0.0538194	0
AC000067.1	0	0	0	0
AC000068.1	0.131654	0.227835	0.198136	0.336576
AC000068.2	0.355503	-0.28036	-0.333596	0.62202
AC000068.3	0.865008	-0.477527	0.267435	0.157791
AC000072.1	0	0	0.0101112	0.0632534
AC000077.1	0	0	0	0
AC000078.1	0	0	0	0
AC000081.1	0	0	0	0
AC000081.2	0	0	0	0
AC000082.1	0	0	0	-0.152608
AC000085.1	-0.282136	0.120906	0.101916	-0.321908
AC000089.1	-0.183949	0.319133	-0.0604939	-0.192087
AC000093.1	0	0	-0.0165721	-0.25896
AC000095.1	-0.203869	-0.114266	-0.00388253	0.45052
AC000095.2	0	0	0	0
AC000111.1	0	0	0	0
AC000111.2	0	0	0	0
AC000113.1	0	0	0	0
AC000120.1	0	0	0.0550158	0.205717
AC000120.2	0	0	0	0
AC000120.3	0	0	0	0
AC000123.1	0	0	0	0
AC000123.2	-0.160904	0	1.70197	2.34373
AC000123.3	-0.0797647	0.00891501	0.287289	0.801511
AC000124.1	0	0	0	0
AC000362.1	0	0	0	0
AC000367.1	0	0	0	0
AC000372.1	0	0	0	0
AC000374.1	0	0	0	0
AC000403.1	0	0	0.190217	0.0945744
AC001226.1	0	0.357162	-0.0331222	0.260352
AC001226.2	0	0	0.0144286	-0.00379847
AC002044.1	0	0	0	0
AC002044.2	0	0	0	0
AC002044.3	0	0	0	0
AC002056.1	-0.441318	0.377213	0.145818	0.0579789
AC002056.2	0	0	0	-0.270542
AC002057.1	0	0	0	0
AC002057.2	0	0	0	0
AC002059.1	-0.00978249	-0.202918	-0.217591	-0.253814
AC002059.2	0.49995	-1.10783	-0.507281	-0.410681
AC002059.3	0	0	0	0
AC002064.1	0	0.145475	0.319284	0.221714
AC002064.2	0	0	0	0
AC002064.3	0	-0.243221	0	0
AC002066.1	0.522676	0.37499	0	0.0365657
AC002069.1	0	0	0	0
AC002069.2	0	0	0	0
AC002069.3	0	0	0	0
AC002069.4	0	0	0	0
AC002070.1	0.177964	-0.0605593	0.16241	0.159112
AC002072.1	0	0	-0.0693984	0.190739
AC002074.1	0	-0.0813732	0	0
AC002074.2	0	0	0	0
AC002075.1	0	0	0	0
AC002075.2	0	0	0.565939	0
AC002076.1	0	0	-0.40419	0
AC002090.1	0	0	0	0
AC002091.1	-0.370674	0.355282	0.148818	-0.015015
AC002091.2	0	0	0.202333	0
AC002094.1	0	0	-0.0517344	-0.177035
AC002094.2	0	0	0.150711	-0.157891
AC002094.3	0	0	0	0
AC002094.4	0	0	0.264539	-0.212873
AC002094.5	0	0	0	0
AC002101.1	0	0	0	0
AC002115.1	-0.196055	0.623296	0.0854662	0.152048
AC002116.1	0	0	0	0.244638
AC002116.2	0.389826	1.08314	0.344592	0.52539
AC002127.1	0	0	0	0
AC002128.1	-0.0726012	-0.0636129	0.657759	-0.0834019
AC002128.2	0	0	0	0.116995
AC002306.1	0	0	0	0
AC002310.1	0.803205	1.18438	0.0941101	0.220691
AC002310.2	0.205897	-0.105236	0.0717921	0.439036
AC002310.3	0	0	0	0
AC002310.4	0	0	-0.118667	-0.063838
AC002310.5	-0.217983	0.412903	-0.216574	0.038057
AC002331.1	0	0	0.0471544	0.147959
AC002347.1	-0.16685	0	0.535846	0.96249
AC002347.2	0	0	-0.399779	-0.424989
AC002350.1	0	0	0	0
AC002350.2	0.0472801	-0.237288	0.257027	-0.23995
AC002351.1	0.0845227	0.0443862	0.179603	-0.104684
AC002368.1	0	0	0	0
AC002375.1	0	0	0	0
AC002377.1	0	-0.185176	0	0
AC002378.1	0	-0.0858956	0	0
AC002381.1	0	0	0	0
AC002383.1	0	0	0	0
AC002386.1	0	0	0	0
AC002398.1	0	0	-0.173603	0
AC002398.2	0	0	-0.918987	-0.838518
AC002401.1	-0.310835	1.21446	0.67466	-0.911934
AC002401.2	0.200961	0.691159	0	0.313609
AC002401.3	0.0510183	-0.739422	0	0.186968
AC002401.4	0.15087	-0.904474	0	0
AC002407.1	0	0	0	0
AC002428.1	0	0	0	0
AC002428.2	0	0	-0.17873	0.324461
AC002429.1	0	0	0	0
AC002451.1	-0.0394811	0.0025769	-0.0238977	-0.0145932
AC002451.2	0	0	0	0
AC002456.1	-0.0632225	0	0.319678	0.193278
AC002456.2	0	0	0	0
AC002458.1	0	0	0	0
AC002460.1	0	0	0	0
AC002460.2	0	0	0.0220521	-0.125577
AC002463.1	0	0	0	0
AC002464.1	0	0	0	0
AC002465.1	0	0	0	0
AC002467.1	0.999646	1.09918	0.511593	0.369059
AC002470.1	0.674606	0.607862	0.483266	0.829685
AC002470.2	0	0	0	0
AC002472.1	0	0	0	0.328617
AC002472.2	0.304679	0.112602	0.247761	0.86967
AC002472.3	-0.146408	0	0.474929	-0.287767
AC002472.4	0	0	0.289853	0
AC002480.1	0	0	-0.0320319	-0.059245
AC002480.2	0	0	0	-0.038942
AC002486.1	0	0	0	0
AC002486.2	0	0	0	0
AC002487.1	0	0	0	0
AC002511.1	0	0	0	0
AC002511.2	0	0	0	0
AC002511.3	0	0	0	0
AC002519.1	0	0	0	0.0267263
AC002519.2	0	0	0	-0.0662773
AC002525.1	0	0	0	0
AC002529.1	0	0	0	0.0932317
AC002540.1	0	0	0	0
AC002542.1	0	0	0	0
AC002542.2	0	0	0	0
AC002542.3	0	0	0	0
AC002542.4	0	0	0	0
AC002542.5	0	0	0	0
AC002542.6	0	0	0	0
AC002543.1	0	0	0	0
AC002545.1	0	0	0	0
AC002546.1	0	0	0	0
AC002550.1	0	0	-0.244296	-0.669149
AC002550.2	-0.757243	0.755681	-0.179156	0.203255
AC002551.1	0	0	0.143175	0
AC002553.1	-0.11464	0.13352	0.198126	0.452855
AC002553.2	0	0	0.795068	0.24359
AC002558.1	0	0	0.106908	0
AC002558.2	0	0	-0.216936	0
AC002558.3	0	0	0.0458819	0.164471
AC002563.1	0	-0.190147	0	0.182685
AC002984.1	0	0	0	0
AC002985.1	0	0	0.122151	0
AC002996.1	0	0	0	-0.120919
AC003001.1	0	0	0	0
AC003001.2	0	0	0	0
AC003002.1	0	0	0	0
AC003002.2	-0.143263	0	0	0.822143
AC003002.3	0	0.172277	0.13014	0.18506
AC003005.1	-0.041769	0	0	0
AC003005.2	0	-0.148598	0.418411	0
AC003006.1	0.124518	0	0.199494	0.170363
AC003009.1	0	0	0	0
AC003035.1	0	0	0	0
AC003035.2	0	0	0	0
AC003043.1	-0.215867	0.299553	-0.438001	0.256677
AC003043.2	0	0	-0.0240761	-0.0241366
AC003044.1	0	0	0	0
AC003070.1	0.189835	0	0	0.18043
AC003070.2	0.321688	0.0179318	-0.389232	0.39556
AC003071.1	0	0	0	0
AC003072.1	-0.810501	0.269482	0.632282	1.15865
AC003072.2	-0.672646	0.0201629	-1.09823	0.292702
AC003077.1	0	0	0	0.0211021
AC003080.1	0	0	0	0
AC003084.1	0	0	0	0
AC003086.1	-0.920147	-0.400957	0.466921	0.00925184
AC003087.1	0	0	0	0
AC003092.1	0	0	0.158466	0
AC003092.2	0	0	0	-0.336491
AC003093.1	0	0	0	0
AC003098.1	0	0	-0.589676	0
AC003101.1	0	0	0	0
AC003101.2	-0.167434	0	-0.609481	-0.676044
AC003101.3	0	0	-0.0990869	0.1617
AC003102.1	0.251684	-0.218101	0.396969	-0.338197
AC003109.1	0	0	0	0
AC003657.1	0	0	0	0
AC003659.1	0	0	0	0
AC003666.1	0	0	0	0
AC003669.1	0	0	0	0
AC003681.1	0	0	0.000903459	-0.000883301
AC003682.1	0	0	0	0
AC003684.1	0	0	0	0
AC003685.1	0	0	0	0
AC003686.1	0	0	0	0
AC003687.1	0	0	0	0
AC003688.1	0	0	0	0
AC003688.2	0	0	0	-0.190491
AC003950.1	0	0	0	0
AC003956.1	0	0	0	0
AC003957.1	0	0	0.0948149	-0.0416189
AC003958.1	0	0	0	0
AC003958.2	0.0205164	0.0266076	0	0.0184008
AC003965.1	0.111893	0.242428	0.775021	0.538193
AC003965.2	0	0.436162	0.76488	0.680861
AC003973.1	0	0	0	0
AC003973.2	0	0	0	0
AC003975.1	0	0	0	0
AC003982.1	0	0	0	0
AC003984.1	0	0	0	0
AC003985.1	0	0	0	0
AC003986.1	0	0	0	0
AC003986.2	0	0	0	0
AC003986.3	0	0	0.530557	0.104927
AC003988.1	0	0	0	0
AC003989.1	0	0	0	0
AC003989.2	0	0	0	0
AC003991.1	0	0	0	-0.00225417
AC003992.1	0	0	0	0
AC004000.1	0	0	0	0.189801
AC004004.1	0	0	0	0
AC004006.1	0	0	0	0
AC004009.1	0	0.156322	0	0
AC004009.2	0	0	0	0
AC004009.3	0	0	0	0
AC004012.1	0.357533	0.364459	0	0
AC004014.1	0	0	0	0
AC004014.2	0	0	0	0
AC004022.1	0	0	0	0
AC004022.2	0	0	0	0
AC004023.1	0.0608163	-0.114518	0.0542563	-0.0442943
AC004024.1	0	0	0	0.276622
AC004034.1	0.223027	0.379536	-0.165519	0.241508
AC004039.1	0	0	0	0
AC004047.1	0	0	0	0
AC004052.1	0	0	0	0
AC004053.1	0	0	0	0
AC004054.1	0	0	0	0
AC004057.1	0.618929	0.495186	0.578833	0.871345
AC004062.1	0	0	0	0
AC004063.1	0	0	0	0
AC004066.1	0	0	0	0
AC004067.1	0.0187661	0	0.521916	0.305832
AC004069.1	-0.100269	0	0.814092	0.512711
AC004069.2	0	0	0	0
AC004069.3	0	0	0	0
AC004076.1	0	0	0	0.0714644
AC004076.2	-0.0418535	0	0.540535	0.520655
AC004079.1	0	0	0	0
AC004079.2	0	0	0	0
AC004079.3	0	0	0	0
AC004079.4	0	0	0	0
AC004079.5	0	0	0	0
AC004080.1	0	0	0	-0.10753
AC004080.10	0	0	0	0
AC004080.11	0	0	0	0
AC004080.12	0	0	0	0
AC004080.13	0	0	0	0
AC004080.14	0	0	0	0
AC004080.15	0	0	0	0.378416
AC004080.16	0	0	0	0
AC004080.17	0	0	0	0
AC004080.2	0.182759	-0.328177	1.68461	1.16576
AC004080.3	0	0	0.112018	0.0952377
AC004080.4	0.656294	0.178974	0.41477	0.574269
AC004080.5	0.232225	0	-0.706158	0.653563
AC004080.6	-0.100541	0	0.0938429	-0.0398555
AC004080.7	0	0	0	0
AC004080.8	0	0	0	0
AC004080.9	0	0	0	0
AC004083.1	-0.0198488	0	-0.0580991	0.0715739
AC004112.1	0	0	0.120833	0.119175
AC004125.1	0	0	0	0
AC004129.1	0	0	0	0
AC004129.2	0	0	0	0
AC004129.3	0	0	0	0
AC004130.1	0	0	0	0
AC004130.2	-0.0305406	0.297235	-0.154665	0.360439
AC004134.1	0	0	0	0
AC004147.1	0	0	0	0
AC004147.2	0	0	0	0
AC004147.3	0	0	0	0
AC004147.4	0	0	0	0
AC004147.5	0	0	0	0
AC004148.1	-0.13417	0.00874314	0.0551809	0.205272
AC004156.1	0.185361	-0.088412	-0.108478	-0.00189624
AC004158.1	0	0.0409948	0	0
AC004160.1	0	0	0.04427	0.0227106
AC004160.2	0	0	0	0.148139
AC004217.1	0	0	0	0
AC004217.2	0	0	0	0
AC004221.1	0.137444	-0.237591	0.0178186	0.0600793
AC004223.1	0	0	0	0
AC004223.2	0	0	0	0
AC004223.3	0	0	0	0
AC004223.4	0	0	0.448482	0
AC004224.1	0	0	-0.132417	0
AC004224.2	0	0.371855	0.766002	0
AC004231.1	0.385805	-0.190431	-0.110607	-0.1165
AC004231.3	0	0	0	0
AC004232.1	0	0	0	0
AC004232.2	-0.354696	-0.164816	0.533354	0.770067
AC004233.1	0	0	0	-0.15411
AC004233.2	0.0701299	0.556084	0.267358	0.269305
AC004233.3	0.238873	-0.383755	0.14368	-1.12957
AC004241.1	-0.256045	-0.429768	-0.106601	-0.0315405
AC004241.2	-0.200869	-0.157307	0.0880493	0.0934484
AC004241.3	-0.0112227	0.583595	0.815775	0.445226
AC004241.4	0	0	0	-0.221324
AC004241.5	0	0	0	0
AC004253.1	0	0	0	0
AC004253.2	0	0	0	0
AC004257.1	0	0	0	-0.912165
AC004263.1	-0.134656	0	-0.0605312	-0.597427
AC004263.2	-0.0383721	-0.0275088	-0.419161	-0.121113
AC004264.1	-0.0548776	0.254943	0.688295	-0.308893
AC004264.2	-0.156472	0	0.0493739	0.169242
AC004381.1	0	0	0	0.230762
AC004381.2	0	0	0	0
AC004381.3	0	0	0	0
AC004381.4	0	0	0	0
AC004386.1	0	0	0	0
AC004386.2	0	0	0	0
AC004386.3	0	0	0	0
AC004386.4	0	0	0	0
AC004386.5	0	0	0	0
AC004386.6	0	0	0	0
AC004408.1	0	0	-0.202957	-0.163961
AC004408.2	0.107317	0	0.558633	0.741231
AC004415.1	0	0	0	0
AC004448.1	0	0	0	0
AC004448.2	0	0	0	0
AC004448.3	0	0	0.146322	0
AC004448.4	0	0	0	0
AC004448.5	0	0	0	0
AC004449.1	0.556083	0.608341	-0.337557	0.105647
AC004453.1	0	0.0498565	0	0
AC004461.1	0	0	0	0
AC004461.2	-0.0945555	0	0.497532	-0.780488
AC004464.1	0	0	0	0.102481
AC004466.1	0.447197	0.699693	0.563017	0.225297
AC004466.2	-0.747376	0.197504	-0.598185	-0.139219
AC004466.3	0	0	0	0
AC004467.1	0	0	0	0
AC004470.1	0	0	0	0
AC004470.2	0	0	0	0
AC004471.1	0.17507	0	-0.0208885	-0.094327
AC004471.2	0.0993534	0.147455	0.429346	-0.49091
AC004477.1	0	0.838814	-0.361074	-0.379996
AC004477.2	0.160877	0.832114	0.658397	0.672028
AC004485.1	0	0	0	0
AC004486.1	0	0	0	0
AC004490.1	0.0390329	0.00293814	0.00598994	-0.123292
AC004491.1	0	0	0	0
AC004492.1	0	0	0.222165	0.194257
AC004494.1	0	0	-0.102873	0.0693785
AC004494.2	0	0	0	0
AC004510.1	0	0	0	0
AC004510.2	0	-0.0842444	0	0
AC004522.1	0	0	0	0
AC004522.2	0	0	0	0
AC004522.3	-0.45693	0.15622	-0.0085799	-0.32044
AC004522.4	0	0	0	0
AC004522.5	0	0	0	0
AC004528.1	0	0	-0.139224	0
AC004528.2	-0.781714	-0.557631	-0.267802	0.517425
AC004540.1	0.0224849	0.0743301	0.37418	0.314818
AC004540.2	0	0	0.356944	0.336416
AC004542.1	0	0.895511	0	0
AC004542.2	0	0	-0.44023	0
AC004542.3	0	0	0	0
AC004542.4	0	0	0	0
AC004542.5	0	0	0	0
AC004542.6	0	0	0	0
AC004543.1	0	0	0	0
AC004549.1	0	0	0	0
AC004551.1	0	-0.288061	0	0
AC004554.1	0	0	0	0
AC004584.1	0	0	0	0
AC004584.2	0	0	0	0
AC004584.3	0	0.0456279	0.0344988	0.0368078
AC004585.1	0.377673	0.593501	0	0
AC004585.2	0	0	0	0
AC004590.1	0.0695779	-0.251185	0	0
AC004593.1	0	0	0	0.229059
AC004593.2	0	0	0	-0.0681635
AC004594.1	0	0.0320854	0	0
AC004596.1	0.0676565	-0.59793	0.159603	-0.196978
AC004597.1	0	0	0	0
AC004623.1	0	0	-0.0668648	-0.156844
AC004636.1	0	0	0	0
AC004637.1	0	0	0	0
AC004672.1	0	0	0	0
AC004672.2	0	0	0	0
AC004674.1	0	0	0	0
AC004678.1	0.219877	0.198152	-0.0937472	-0.322666
AC004678.2	0.0978646	0.205598	-0.537124	-0.235585
AC004687.1	0	0	0.154796	0
AC004687.2	0.0100242	-0.0311185	0.0285724	0.0646714
AC004687.3	0	0.0581805	-0.0673547	0.0392907
AC004690.1	0	0	0	0
AC004690.2	0	0	0	0
AC004691.1	0	0	0	0
AC004691.2	0.198039	0	0	0
AC004692.1	0	0.242954	0	0
AC004692.2	0.146226	0.17514	0	0
AC004696.1	0	0	0.267248	0
AC004696.2	0	0	0	0
AC004702.1	0	0	0	0
AC004704.1	0.102967	-0.0503094	0	-0.00684635
AC004704.2	0	0	-0.048283	0.030962
AC004704.3	0	0	0	0
AC004706.1	-0.457831	-0.0595259	0.0960671	0
AC004706.2	0	0	0	0
AC004706.3	-0.232033	-0.0213017	0.38328	0.0150313
AC004707.1	0.226472	-0.000496172	-0.0643097	-1.33574
AC004765.1	0	0	0	0
AC004771.1	0	0	0.0311888	-0.0854201
AC004771.2	-0.318042	0.0282837	0.219334	0.218845
AC004771.3	-0.473545	0.0572537	0.890494	-0.376661
AC004771.4	0	-0.159922	-0.109119	0.344468
AC004774.1	0	0	0	0
AC004774.2	0	0	0	0
AC004774.3	0	0	0	0
AC004775.1	0	0	0	0
AC004777.1	0	0	-0.465187	0
AC004784.1	0	0	0	0
AC004788.1	0	0	0	0
AC004790.1	0	0	0	0
AC004790.2	0.17795	0	0	0
AC004792.1	0	0	0	0
AC004801.1	0	0	0	0
AC004801.2	-0.511704	0	1.7152	1.54185
AC004801.3	0	0.112152	-0.00366812	0.07624
AC004801.4	0	0	0	0
AC004801.5	0	0	0	0
AC004801.6	-0.0454384	-0.198265	0.708011	1.33405
AC004801.7	0	0	0	0.0740653
AC004803.1	0.0325537	0.0518264	0.513016	0.280554
AC004805.1	0	0	0.0541136	0.229298
AC004805.2	0	0	0	0
AC004805.3	0	0	0	0
AC004808.1	0	0	0	0
AC004808.2	0	0	0	0
AC004812.1	0	0	0	0
AC004812.2	0.382154	0.357056	-0.0473216	-0.100134
AC004816.1	0.384411	0.386536	0.448069	1.06472
AC004816.2	0.959574	-0.14846	0.762762	0.628908
AC004817.1	0	0	0	0
AC004817.2	0	0	0	0
AC004817.3	0	0	0	0
AC004817.4	0	0	0	0
AC004817.5	0	0	0	0
AC004825.1	0	0	0	0
AC004825.2	0.509035	1.23726	-0.609359	0.302201
AC004825.3	0	0	0	0
AC004828.1	0	0.162094	0	0
AC004828.2	0	0	0	0
AC004830.1	0	0	0	0
AC004830.2	0	0	-0.163332	0
AC004832.1	0	0	0	0
AC004832.2	0	0	0	0
AC004832.3	0	0	0	0
AC004832.4	0	0	-0.18945	-0.0416294
AC004832.5	-0.222594	-0.346203	0.502821	-0.97292
AC004832.6	0.333544	0.107451	0.151418	-0.0302227
AC004834.1	-0.0603494	0.113845	0.182401	0.0223127
AC004835.1	-0.0587015	-0.0353157	0.0572726	-0.113755
AC004836.1	0	0	0	0
AC004837.1	0	0	0	0
AC004837.2	-0.200148	0	0	0
AC004837.3	0	0	0	0
AC004837.4	0	0	0.402919	-0.0885709
AC004839.1	-0.459557	-0.52425	0	0.443641
AC004839.2	0.17085	-0.172257	0.165852	0.305983
AC004840.1	0	0	0	-0.310923
AC004846.1	0	0	0	0
AC004846.2	0.130743	0.810971	0.219652	0.160019
AC004847.1	0	-0.0928785	0	0.0455567
AC004852.1	0	0	0	0
AC004852.2	0	0	0	0
AC004852.3	0	0	0	0
AC004854.1	0	0	0	0
AC004854.2	0.0394544	0.0738689	-0.0204277	-0.0450241
AC004858.1	0	0	0	0
AC004862.1	0	0	0	0
AC004863.1	0	0	0	0.131101
AC004865.1	0	0	0	0
AC004866.1	0	0	0	0
AC004866.2	0	0	0	0
AC004869.1	0	0	0	0
AC004869.2	0	0	0	0
AC004870.1	0	0	0	0
AC004870.2	0	0	0	0
AC004870.3	0	0	0	0
AC004870.4	0	0	0	0
AC004875.1	0	0	0	-0.143583
AC004877.1	-0.0168113	0.20351	-0.0990676	-0.165246
AC004877.2	-0.413811	0.467379	0.227226	0.473169
AC004879.1	0	0	0	0
AC004882.1	0	0	0	0
AC004882.2	0	0	0	0
AC004882.3	0.237998	0.263242	0.269946	0.19248
AC004884.1	0	0	0	0
AC004884.2	0	0	0	0
AC004888.1	0	0	0	0
AC004890.1	1.80139	0.109676	0.348066	-0.943545
AC004890.2	0.0516478	-0.044908	-0.09188	-0.0703924
AC004890.3	0	0	-0.0831209	-0.0875934
AC004893.1	0	0	0	0
AC004893.2	0	0	-0.0515821	-0.0598725
AC004895.1	0.126208	-0.0733022	-0.258377	0.305078
AC004898.1	0	-0.221435	0	0
AC004899.1	0	0	0	0
AC004899.2	0	0	0	0
AC004900.1	0.124661	0.125638	0.103312	0
AC004908.1	0	0	0.424928	0
AC004908.2	0.363241	0.593805	0.100002	0.707867
AC004908.3	0.163683	0	-0.33581	-0.0160236
AC004910.1	0	0	0	0
AC004911.1	0	0	0	0
AC004912.1	0	0	0	0
AC004917.1	0.196235	0	0	0
AC004918.1	0.23027	-0.127762	0.638669	0.756779
AC004918.3	-0.545111	-0.0169115	0.299199	0.41221
AC004920.1	0	0	0	0
AC004921.1	0	0	0	0.0991249
AC004921.2	0	0	0	0.0255999
AC004922.1	0	0.00632623	0	0.0321112
AC004923.1	0.911313	0.679147	0.186228	0.585484
AC004923.2	0	0	0	0
AC004923.3	0	0	0	0
AC004923.4	-0.0979858	0	0.362465	-0.170639
AC004925.1	0	-0.0662064	0	0
AC004930.1	0	0	0	0
AC004936.1	0	0	0	0
AC004938.1	0	0	0	0
AC004938.2	-0.104244	-0.225244	0.425197	0.143518
AC004941.1	0	0	0	0
AC004941.2	0	0	0	0
AC004943.1	-0.0776647	-0.110886	0.103348	0.524958
AC004943.2	-0.0234364	-0.0422191	-0.103409	-0.0171051
AC004943.3	0.4599	0.171428	0	0.476558
AC004944.1	0	0	0	0
AC004945.1	0	0	0	0
AC004946.1	0	0	0	0
AC004946.2	0	0	0	0
AC004947.1	0	-0.0202699	0	0.025553
AC004947.2	0	0	0.0329815	0.0954271
AC004947.3	-0.259346	-0.160298	0	0.248984
AC004948.1	0	0	0	-0.140122
AC004951.1	0.00652549	0.267207	0.0249421	-0.345896
AC004951.2	1.15436	1.50749	0.526317	0.621233
AC004951.3	0.197343	-0.305905	0.321693	-0.132979
AC004951.4	0	0.236244	-0.087482	0.37927
AC004965.1	0	0	0	0
AC004967.1	1.00857	0.398052	-0.359648	-0.00592444
AC004967.2	0.419769	0.318433	0.0788762	-0.105265
AC004969.1	0	0	0.146473	0
AC004972.1	0	0	0	0
AC004973.1	-0.143335	-0.512995	0.133916	-0.282004
AC004974.1	0	-0.0332162	0	-0.0625655
AC004975.1	0	0	0	0
AC004975.2	-0.254037	0.00827645	-0.156966	-0.165191
AC004980.1	0.268628	0.811627	0.451976	0.208112
AC004980.2	0	0	-0.878696	-0.0557228
AC004980.3	-0.376335	0	0	-0.267178
AC004980.4	0	0	0	0
AC004982.1	0.0549643	0	0.19979	0.206232
AC004986.1	0	0	0	0
AC004987.1	0	0	0	0
AC004987.2	0	0	0	0.0945203
AC004987.3	0	0	0	0
AC004990.1	-0.00125752	-0.14473	0.0375056	0.176593
AC004997.1	0	0	-0.0746263	0.0296518
AC005002.1	0	0	0	0
AC005005.1	0	0	0	0
AC005005.2	0	0	0	0
AC005005.3	-0.08663	0.748253	0.00703961	0
AC005005.4	0.00811846	0.000315264	-0.0056	-0.0159557
AC005006.1	0	-0.349362	0	-0.03523
AC005008.1	0	0	0	0
AC005008.2	0	0	0	0
AC005009.1	0	0	0	0
AC005011.1	0	0	0	0
AC005013.1	0	0	0	0
AC005014.1	0	-0.0603235	0.0290463	0.0578531
AC005014.2	0	0	-0.0175926	0.231808
AC005014.3	0	0	0	0
AC005014.4	0	0	0	0
AC005019.1	0	0	0	0
AC005019.2	0	0	0	0
AC005020.1	0	0	0	0
AC005020.2	0.0462362	-0.34898	-0.650267	-0.0795722
AC005021.1	0.508974	0.670316	-0.206401	0
AC005034.1	0	0	0	0
AC005034.2	0	0	0	0.19794
AC005034.3	0	0	0	0
AC005034.4	0.00933913	0	0.423052	0.461923
AC005034.5	-0.361403	0	1.9401	2.79416
AC005034.6	-0.25655	-0.250905	-0.129719	-0.148295
AC005037.1	-0.0253566	0.410947	0.176582	0.876133
AC005040.1	0	0	0	0
AC005040.2	0	0	0	0
AC005041.1	0	0	-0.0132604	0
AC005041.2	0	0	0.167701	0.145773
AC005041.3	0.0418379	-0.326976	0.285239	0.194038
AC005041.4	0	0	-0.161464	-0.132418
AC005041.5	-0.320802	0.143033	0.916086	-0.0891721
AC005042.1	0	0	0	0
AC005042.2	0	0	0	0
AC005045.1	0	0	0	0.485986
AC005045.2	0	0	0.0430346	-0.402567
AC005046.1	0	0	-0.555083	0.773889
AC005050.1	0.14917	0	-0.0942876	0.173488
AC005050.2	0	0	0	0
AC005050.3	0	0	0	0
AC005052.1	0.0428294	0	0.165832	0.191148
AC005052.2	0.00225524	-0.107116	0.372541	0.251988
AC005062.1	0.100919	0.035643	0	0
AC005064.1	0	0.22329	0	0
AC005066.1	0	0	0	0
AC005070.1	0	0	0	0
AC005070.2	0	0	0	0
AC005070.3	0	0	0.291507	0.406551
AC005071.1	0	-0.138861	0	0
AC005072.1	0	0	0.0949696	0
AC005076.1	1.09145	0.497526	0.0491545	0.532177
AC005076.2	0	0	-0.709201	0.382408
AC005077.1	0	0	0	0.380248
AC005077.2	0	0	-0.127519	1.07527
AC005077.3	0.231065	0	-0.154541	0.326238
AC005077.4	-0.0964619	0.0124921	0.155496	0.0545111
AC005081.1	-0.00486706	0.203077	-0.535614	-0.167957
AC005082.1	0.138346	0	0.0429171	0.0383674
AC005082.2	0	0	0	0
AC005083.1	1.53117	1.10987	-0.313133	0.266296
AC005084.1	0	0	0	0
AC005086.1	0	0	0	0
AC005086.2	0	0	0	0
AC005086.3	0	0	0	0
AC005086.4	0	0	0	0
AC005086.5	0	0	0	0
AC005088.1	0	0	0	0
AC005089.1	0.146294	0.26554	-0.334645	0.299292
AC005090.1	0	0	0	0
AC005094.1	0	0	0	0
AC005096.1	0	0	0	0
AC005099.1	0	0	0	0
AC005100.1	0	0	0	0
AC005100.2	0	0	0	0
AC005102.1	0	0	0	0
AC005104.1	0	0.424976	0	0
AC005104.2	0	0	0	0
AC005105.1	0	0	0	0
AC005144.1	0	0.413449	0	0
AC005153.1	0	0	0	0
AC005154.1	0	0	0	0
AC005154.2	0	0	0.3213	0.314461
AC005154.3	0	0.0164669	0	0.315587
AC005154.4	0	0	0	0
AC005154.5	0	0	0	0
AC005156.1	0	0	0	0
AC005160.1	0	0	0	-0.238667
AC005162.1	0	0	0	0
AC005162.2	0	0	0	0
AC005165.1	-0.00251626	-0.0308656	0.036686	0.0680094
AC005165.2	0	0	0	0
AC005165.3	0	0	0.183117	0
AC005176.1	0	0	0	0
AC005176.2	0	0	0	0
AC005178.1	0	0	0	0
AC005180.1	-0.120287	-0.226199	-0.0282637	0.395457
AC005180.2	0	0	-0.133768	-0.314899
AC005181.1	0	0	0	0
AC005183.1	0	0	0	0
AC005185.1	0	0	0	0
AC005189.1	0	0	0	0
AC005191.1	0	0	0	0
AC005192.1	0	0	0	0.0238262
AC005197.1	0	0	0	0.0865151
AC005208.1	0	0	0	0
AC005209.1	0	0	-0.0879606	0
AC005220.1	-0.0861449	0	0	0
AC005224.1	0	0	-0.0228898	0.089275
AC005224.2	0	0	0	0.155489
AC005224.3	0.0407551	1.28292	0.550703	0.0620811
AC005225.1	0	0	0	0
AC005225.2	0	0	0.0234015	0.0457764
AC005225.3	0	0	0	0
AC005225.4	0	0	0.0562607	-0.115438
AC005229.1	0	0	0	0
AC005229.2	0	0	0	0
AC005229.3	0.480541	0.767333	0.155201	0.112804
AC005229.4	0	0	0	0
AC005230.1	0	0	0	0
AC005232.1	0	0	0	0
AC005234.1	0	0	0	0
AC005234.2	0	0	0	0
AC005237.1	0	0	0	0
AC005244.1	0.0357748	0.297957	0	-0.265666
AC005244.2	0	0	0	0
AC005252.1	0	0	0	0
AC005252.2	0	0	0	0
AC005252.3	0	0	0	0
AC005252.4	0	0	0	0
AC005253.1	0.0511271	0.0292214	0.132563	-0.216102
AC005253.2	-0.944633	-0.250906	-0.234747	0.440465
AC005255.1	0.888268	1.17526	1.56909	0.796843
AC005256.1	0.924761	0.595006	-0.0239979	0.702756
AC005258.1	0	0	0	0
AC005258.2	0	0	-0.181061	0
AC005261.1	-0.492507	-0.128604	1.93881	2.88901
AC005261.2	0.0360028	-0.251614	0.159659	0.13739
AC005261.3	0	0	0	0
AC005261.4	0	0	0	0
AC005261.5	0	0	0	0
AC005262.1	0	0	0	0
AC005262.2	-0.982087	-0.357425	0.151777	-1.64869
AC005264.1	0	0	-0.0398459	0
AC005274.1	0	0	0	0
AC005277.1	0	0.293937	-0.311226	0.777251
AC005277.2	0	0	0	0
AC005280.1	0	0	0.0400702	0.0403041
AC005280.2	0	0	0	0
AC005280.3	0	0.131023	0	0
AC005281.1	0.114267	0	0	0
AC005288.1	0.417918	0	-0.412068	0.298356
AC005291.1	0.13785	0.0555257	0.249558	0.49284
AC005291.2	0.19355	-0.532841	0.489175	0.937109
AC005293.1	0	0	0	0
AC005294.1	0	0	0	0
AC005296.1	0	0	0	0
AC005297.1	0	0	0	0
AC005297.2	0	0	0	0
AC005297.3	0	0	0	0
AC005301.1	0	0	0	0
AC005301.2	0	0	0	0
AC005303.1	0	0	0	0
AC005304.1	0	0	0	0.330903
AC005304.2	0	0	0	0
AC005304.3	0	0	0	0.0866311
AC005306.1	0.0833286	0.19931	0.100745	-0.156456
AC005307.1	0	0	0.107153	0.0549161
AC005323.1	0	0	0	0
AC005323.2	0	0	0	0
AC005324.1	0	0	0	0
AC005324.2	0	0	0.0623026	0.0448145
AC005324.3	0	0	0	0
AC005324.4	0	0	-0.295682	0
AC005324.5	0	0	0	0
AC005326.1	0	0	0	0
AC005329.1	-0.0901373	0.635751	0.148643	-0.359404
AC005329.2	-0.166016	0	-0.31597	0.699701
AC005329.3	-0.0539723	0.260334	0.146945	-0.198427
AC005330.1	0	0	0	0
AC005332.1	-0.323017	-0.046747	-0.47373	-0.452541
AC005332.2	0	-0.0351723	0.0296077	0.135326
AC005332.3	-0.532228	-0.100903	2.00454	2.09168
AC005332.4	-0.328278	0.279358	0.737269	0.638353
AC005332.5	-0.200829	-0.133053	1.51033	1.94985
AC005332.6	-0.76281	0.35399	1.04962	1.3493
AC005332.7	0	-0.158827	0.137218	0.617355
AC005336.1	-0.667277	-0.572793	0	0
AC005336.2	0	0	0	0
AC005336.3	0	0	0	0
AC005339.1	-0.167681	-0.522121	-0.185923	-0.0437698
AC005341.1	0	0	0	0
AC005342.1	0.130772	-0.530669	0	0.596242
AC005342.2	0	0	0	0
AC005343.1	0	0	0	0
AC005343.4	-0.307453	0.287341	0.0456404	-0.216056
AC005344.1	0	0	0	0
AC005345.1	0	0	0	0
AC005351.1	0	0	0	0
AC005355.1	0	0	-0.205323	-0.433867
AC005355.2	0.179878	0	0	0
AC005357.1	0	0	0	0
AC005357.2	0	0	0	0
AC005358.1	0	0	0	-0.0452257
AC005363.1	0	0	0	0
AC005363.2	-0.445641	0	0.0213063	1.54124
AC005377.1	0	0	0	0
AC005379.1	0	0	0	0
AC005381.1	0	0	0	0
AC005383.1	0	0	0	0
AC005387.1	0	0	0	0
AC005387.2	0	0	0	0
AC005391.1	0	0	0	0.689184
AC005392.1	0	0	0	0
AC005392.2	0	-0.42526	0	0
AC005392.3	0	0	0	0
AC005393.1	-0.348576	0	1.11284	1.19434
AC005394.1	0	0	0	0
AC005394.2	0	0	0	0
AC005400.1	-0.291444	0.131122	0.160181	0.531303
AC005410.1	0.125446	0.302526	0	-0.0821277
AC005410.2	0	1.0056	0	0
AC005412.1	0	0	0	-0.132069
AC005414.1	0	0	0	0
AC005476.1	0	0	0.383948	0
AC005476.2	0.767219	1.05125	0.353143	0.306814
AC005479.1	0	0.722162	0.0503154	0.535012
AC005479.2	0	-0.222981	-0.325084	0.190626
AC005480.1	0.00743189	0.0281065	0	0.0952182
AC005480.2	0	0	0	0
AC005481.1	0	0	0	0
AC005482.1	0	0	0	0
AC005486.1	-0.690784	0.0182414	0.356374	-1.39351
AC005487.1	0	0	0.0305189	0
AC005495.1	0	0	0	0
AC005498.1	0	0	0	0
AC005498.2	0	0	0.187587	0.322139
AC005498.3	0	0	0.0860238	0.12536
AC005514.1	0	0	0.368468	0
AC005515.1	0	0	0	0
AC005518.1	0	0	0	0
AC005518.2	0	0	0	0
AC005519.1	0	-0.203985	0.165927	0.346215
AC005520.1	0	0	-0.0625793	0.0402008
AC005520.2	-0.122035	0.108314	-0.0191477	0.19819
AC005520.3	0	0.275224	-0.37311	0.0124454
AC005520.4	0	0	0	0
AC005520.5	0.145632	0.0515682	0.229287	0.0405273
AC005521.1	0	0	-0.103631	0
AC005522.1	0	0	0	0
AC005523.1	0.147146	0.805429	-0.325656	-0.365132
AC005523.2	-0.128022	-0.0175286	-0.297738	-0.550935
AC005524.1	0	0	0	0
AC005529.1	0	0	0.703348	-0.775275
AC005531.1	-0.0687004	0	0	-0.00775705
AC005532.1	0.0559259	-0.0192072	-0.0490918	0.15679
AC005532.2	0	0	0	0
AC005534.1	0	0	0	0
AC005537.1	0	0	0.183288	0.153794
AC005538.1	0	0	0	0
AC005538.2	0	0	0	0
AC005538.3	0	0	0	0
AC005540.1	0.078401	-0.0620717	0.402654	0.572047
AC005544.1	0	0	0	0
AC005544.2	0	0	0	0
AC005546.1	-0.788743	-0.243964	0.776752	-0.309712
AC005548.1	0.0557458	0	0	-0.0436714
AC005549.1	0	0	0	0
AC005550.1	0	0	0	0
AC005550.2	0	0	0	0
AC005551.1	0	0	0.0155206	0
AC005552.1	0	0	0	0
AC005559.1	0	0	0.0969205	-0.535341
AC005562.1	0.0160349	0.0205401	-0.064721	-0.0185383
AC005562.2	0	0	0	0
AC005578.1	0.280601	0.103758	0.25335	0.374375
AC005580.1	0	0	0	0
AC005586.1	0.0139541	0.040992	0.0898304	-0.0316851
AC005587.1	0	0	0	0
AC005588.1	0	0	0	0
AC005592.1	-0.0926568	0	0	0
AC005592.2	0	0	0	0
AC005593.1	0.169662	0	0.555905	0
AC005594.1	0	0	0	-0.0443825
AC005597.1	0	0	0.371971	0.320304
AC005599.1	0.329658	0	0	0
AC005606.1	0.507019	0.216734	-0.355772	0.0837942
AC005606.2	0.134907	-0.116431	0.296494	0.0256303
AC005609.1	0	0	0	0
AC005609.2	0	0	0	-0.0142032
AC005609.3	0	0	0	0
AC005609.4	0	0	0	0
AC005609.5	-0.0374602	0	0.0854144	0.046528
AC005614.1	-0.0514625	0	0.0934181	0
AC005614.2	0	0	0	0
AC005616.1	0	0	0	0
AC005618.1	-0.0255413	0.166339	-0.0619281	0.26178
AC005618.2	0	0	0	0
AC005618.3	0	0	0	0
AC005618.4	0.0270271	0.20753	-0.0259006	0.13256
AC005622.1	0.0996103	0.199909	0.0460548	0.0219469
AC005625.1	0	0	-0.300254	0
AC005632.1	0	0	0	0
AC005632.2	0.176787	0	-0.00997691	-0.0370415
AC005632.3	-0.440728	-0.334579	-0.106424	0.422623
AC005632.4	0	0	0	0
AC005632.5	0	0	0	0
AC005632.6	0	0	0	0.266493
AC005670.1	0.262667	0.0175883	0.670799	1.09724
AC005670.2	0	0	0.0902094	0
AC005670.3	0.152308	0.294606	0.445173	0.582358
AC005674.1	-0.0427569	0	0.303318	0.222337
AC005682.1	0	0	-0.14663	-0.0603984
AC005682.2	0	-0.148944	-0.029539	0.0495028
AC005691.1	0	0	-0.347468	-0.196708
AC005692.1	0	0	0	0
AC005692.2	0	0	0	0
AC005692.3	0	0	0	0
AC005695.1	0	0	0	-0.0344535
AC005695.2	0	0	0	0
AC005695.3	0	-0.865205	0.334431	0
AC005696.1	-0.196402	0.405138	0.012343	-0.171049
AC005696.2	0	0	-0.120647	0
AC005696.3	0.772096	-0.144025	0.560887	-0.295138
AC005696.4	-0.0490281	0.0788797	0.0303698	-0.176048
AC005697.1	0	0.0125814	0	0
AC005697.2	0	0	0	0
AC005697.3	0	0	0	0
AC005699.1	-0.0372981	0.070774	0	0
AC005702.1	0	0	0	0
AC005702.2	0	0	0	-0.0572526
AC005702.3	0	0	0	0.626381
AC005702.4	0	0	0	0
AC005702.5	0	0	0	0
AC005703.1	0	0	0	0
AC005703.2	-0.369213	0	0	0
AC005703.3	0	0	0.292778	0.275244
AC005703.4	0	0	0	0
AC005703.5	0.154455	-0.0496999	0.154328	0.274369
AC005703.6	0	0	0	0
AC005722.1	0	0	0	0
AC005722.2	0	0	0	0
AC005722.3	0	0	-0.0768915	0.0937143
AC005722.4	0	0	-0.31597	-0.822458
AC005725.1	0	0	0	0
AC005726.1	0	0	0	0
AC005726.2	0.00905117	0.0704038	-0.543061	-0.936314
AC005726.3	-0.666875	0	-0.242725	-0.0792094
AC005726.4	0	0	0	0.0679192
AC005730.1	0	0	0	0
AC005730.2	0.341168	0.537779	0.220298	0.510181
AC005730.3	-0.00689059	0	0.999265	0.192365
AC005736.1	0	0	0	0
AC005740.1	0.692076	0	0	0
AC005740.2	0	0	0	0
AC005740.3	0	0	-0.475383	0
AC005740.4	0.0937725	0	-0.0800498	-0.510193
AC005740.5	0	0.0532827	0	0.0181045
AC005741.1	0	0	0	0
AC005746.1	0	0	-0.051882	-0.271574
AC005746.2	0	0	-0.0738464	-0.321084
AC005746.3	0	0	0.20665	0
AC005753.1	0	0	0	-0.289033
AC005753.2	0	0	0.278269	0
AC005753.3	-0.0888246	0.051357	0	0
AC005757.1	0	0	0	0
AC005758.1	0	0	0	0
AC005759.1	0.216057	0.106009	-0.140135	-0.352739
AC005771.1	0	0	0	0
AC005772.1	0	0	0	0
AC005772.2	0	0.0251119	0	0
AC005774.1	0	0	0	0
AC005774.2	0	0	0	0
AC005775.1	-0.283345	0.73309	-0.576861	0.241656
AC005776.1	0	0	-0.104707	-0.120929
AC005776.2	0	0	0	0
AC005777.1	0	0	0.404531	0.87775
AC005785.1	-0.0704211	-0.0619416	0.331182	-0.453521
AC005785.2	0	0	-0.253468	-0.295054
AC005786.1	0	0	0	0.480617
AC005786.2	0	0	-0.435079	0.190901
AC005786.3	0.299136	-0.201322	0.432298	-0.495561
AC005786.4	0	0	-0.111112	-0.323322
AC005787.1	0	0	0	0
AC005789.1	-0.24262	0	1.13419	0.739403
AC005790.1	-0.540977	-0.593416	0.328841	0.63274
AC005796.1	0.242129	0.0349244	-0.0163736	0
AC005798.1	0	0	0	0
AC005803.1	0	0	0	0.0515878
AC005808.1	0	0	0	0
AC005821.1	0.0733294	0.0684355	0.0361971	-0.0247063
AC005821.2	0	0	0	0
AC005823.1	0	0	0	0.236924
AC005823.2	0	0	0	0
AC005828.1	0	0	0	0
AC005828.2	0	0	0	0
AC005828.3	0	0.178346	0	0
AC005828.4	0.570775	-0.102466	0	-0.268375
AC005828.5	0	0	0	0
AC005828.6	0	0	0.842648	0
AC005828.7	0	0	0	0
AC005829.1	0.505801	1.1027	0.328306	-0.69147
AC005829.2	0	0	-0.360743	0.374753
AC005831.1	-1.57778	-0.497785	0.785171	0.75632
AC005832.1	0	0	0	-0.16328
AC005832.2	0.0634251	0	0	0
AC005832.3	0	0	0	0
AC005832.4	0	0	0	0
AC005833.1	0	0	0	0.0436818
AC005833.2	0	0	0	0
AC005837.1	0.726496	0.193245	0.953113	0.56394
AC005837.2	0	0	0	0
AC005837.3	0	0	0.401525	0.248543
AC005837.4	0	0	0.0426083	1.1873
AC005838.1	0	0	0	0
AC005838.2	0	0	0.470689	0.579229
AC005839.1	-0.236114	-0.0148275	0.824963	0.710674
AC005840.1	0.227095	0.492709	0.218885	0.3527
AC005840.2	-0.495716	0.0271283	0	0
AC005840.3	-0.0311259	0	0	-0.0771967
AC005840.4	0	0	0	0
AC005841.1	-0.617409	0.197498	-1.22241	-1.67022
AC005845.1	0.0200044	-0.133958	0.245341	0
AC005856.1	0	0	0	0
AC005858.1	0	0	0	0
AC005858.2	0	0	0	0
AC005858.3	0	0	0	0
AC005863.1	0	0	0	0
AC005865.1	0.231807	-0.0829121	0.298804	0.191653
AC005865.2	0.482363	0.50581	-0.0727117	-0.269881
AC005871.1	0	0	0	0
AC005871.2	0	0	0	-0.290106
AC005884.1	0	0.240346	0.358581	-0.681415
AC005884.2	0	0	0	0
AC005888.1	0	0	0	0
AC005899.1	0	0	0	0.455127
AC005899.2	0	0	0	0
AC005899.3	0	0	0.290821	0
AC005899.4	0	0	0	0
AC005899.5	0	0	-0.374896	0.130369
AC005899.6	0	0.607565	0.0290998	0.16589
AC005899.7	0	0	0	-0.262127
AC005899.8	-0.0809228	-0.00491344	-0.00257726	-0.2765
AC005901.1	0	0	0	0
AC005906.1	0	0	0	0
AC005906.2	-0.0161642	0	0	0
AC005906.3	0	0	0	0
AC005908.1	0	0	0	0
AC005908.2	0	0	0	0
AC005909.1	0	0	0	0
AC005909.2	0	0	0	0
AC005911.1	0.0319379	0.295257	-0.0107457	0.866582
AC005912.1	0.256373	0.136028	-0.0339386	0.473852
AC005912.2	0	0	0.072409	0
AC005914.1	0	0	0.154432	0
AC005915.1	-0.046657	0	0	0
AC005920.1	0	0.102609	0.162306	0
AC005920.2	0	0	0	0
AC005920.3	0	0	0	-0.0137261
AC005920.4	0	0	0	0
AC005921.1	0	0	0.276941	0
AC005921.2	0	0	0.124771	0.298696
AC005921.3	0	0	0	0.165236
AC005921.4	0.0561212	-0.0476279	0	0
AC005943.1	0.261595	-0.397311	0.181644	-0.26384
AC005943.2	-0.534232	0	0	0.0476234
AC005944.1	0.768197	0.265138	0.311055	-0.509016
AC005951.1	0	0	0	0
AC005954.1	-0.441722	0	-0.0661286	0.489805
AC005954.2	0	0	0.289453	-0.285092
AC005962.1	-0.454504	0.308652	0.540689	0.622112
AC005962.2	-0.17932	0.0130296	0.163697	0.282799
AC005972.1	0	0	0	0
AC005972.2	0	0	0	0
AC005972.3	0	0	0.0866891	0
AC005993.1	0.727517	0.0500594	0.0378903	0
AC005996.1	0	0	0	-0.14256
AC005998.1	0	0	0	0
AC005999.1	0	0	0	0
AC005999.2	0	0	0	0
AC006001.1	0	0	0.173368	0
AC006001.2	0.529272	0.262774	-0.00366842	-0.0459903
AC006001.3	0.348725	0.871594	0.527306	0.257129
AC006001.4	0	0	0	0
AC006003.1	0	0	0	0
AC006006.1	0	0	0	0
AC006007.1	0	0	0	0
AC006008.1	0	0	0.151844	0
AC006013.1	0	0	0	0
AC006015.1	0	0	0	0
AC006017.1	0	0	0.537548	-0.0126237
AC006019.1	0	0	0	0
AC006019.2	0	0	0	0
AC006019.3	0	0	0	0
AC006020.1	0	0	0	0.166063
AC006022.1	0	0	0	0
AC006023.1	0	0	0	0.852997
AC006023.2	0	0	0.446172	0.448442
AC006026.1	0	0	0	0
AC006026.2	0	0	0	0
AC006026.3	0	0	0	1.02336
AC006027.1	-0.237596	0.140339	-0.287755	1.23273
AC006028.1	0	0	0	0
AC006030.1	-0.0187925	0	0.0437346	-0.251717
AC006033.1	0	0	-0.383927	0
AC006033.2	0	0	0.0869724	0.190871
AC006037.1	0	0	0	0
AC006037.2	0	0	0	0
AC006040.1	0	0	0	0
AC006041.1	0	0	0	0
AC006041.2	0	0	0	0
AC006042.1	0	0	0.156838	0.15858
AC006042.2	0	0	0.368423	0.440555
AC006042.3	0	-0.12673	-0.211395	0.475276
AC006043.1	0	0	0	0
AC006055.1	0	0	0	0
AC006058.1	0	0	0.423399	0.932545
AC006058.2	0	0	-0.155721	-0.30097
AC006058.3	0	0	0.167596	-0.130033
AC006058.4	0	0	0.0523952	0
AC006059.1	0.143911	-0.0485306	-0.109699	-0.152122
AC006059.2	0	0	0.0151984	-0.0862733
AC006059.3	0	0	0	0
AC006059.4	0	0	0	0
AC006059.5	0	-0.0367373	-0.0132607	-0.0395923
AC006062.1	0	0	0	0
AC006063.1	0	0	0	0
AC006063.2	0	0	0	0
AC006063.3	0	0	0	0
AC006063.4	0	0	0	0
AC006064.1	0	0	0	0
AC006064.2	0	0.0575753	-0.0619218	-0.910037
AC006064.3	-0.292096	0.217893	0.895924	0.976003
AC006064.4	-0.672652	0.157741	-0.316743	-1.19314
AC006064.5	0	0	0	0
AC006064.6	0	0	-0.0218424	0
AC006065.1	0	0	0	0
AC006065.2	0	0	0	0
AC006065.3	0	0	0	0
AC006065.4	0	0.0888333	0	0
AC006065.5	0	0	0	0
AC006065.6	0	0	0	0
AC006076.1	0	0	0	0
AC006077.1	0	0	0	0
AC006077.2	0.873249	-0.0186648	0.116241	-0.0916382
AC006111.1	0	0	-0.259893	0.12462
AC006111.2	-0.0322695	-0.284276	-0.16108	-0.337284
AC006111.3	0	0	0	0
AC006112.1	0	0	0	0
AC006115.1	0	0	0	0
AC006115.2	0	0	0	0
AC006116.1	0	0	0	0
AC006116.2	0	0	0	0
AC006116.3	0	0	0	0
AC006116.4	0	0	0	0
AC006116.5	0	0	0	0
AC006116.6	0	0	0.0786063	0.0667157
AC006116.7	-0.0282959	-0.0405959	0.0341505	-0.190543
AC006116.8	0	0	0	0
AC006116.9	0	0	0	0
AC006122.1	0	0	0	0
AC006127.1	0	0	0	0
AC006128.1	-0.341697	-0.168999	0.00962211	-0.642249
AC006130.1	0	0	0	0
AC006130.2	0	0	0	0
AC006130.3	0	0	0	0.212669
AC006133.1	0	0	0	0
AC006141.1	0	0	0	0.0342966
AC006144.1	0	0.339852	0	0
AC006146.1	0	0	0	0
AC006148.1	0	0.00524054	0.0258089	0.035748
AC006148.2	0	0	0	0
AC006150.1	0	0	0	0
AC006153.1	0	0	0	0
AC006157.1	0	0	0	0
AC006158.1	0	0	0	0
AC006158.2	0	0	0	0
AC006158.3	0	0	0	0
AC006159.1	0	0	0	0
AC006160.1	0	0	0.00719305	-0.154183
AC006160.2	0	0	0	0
AC006195.1	0	-0.092558	-0.0829154	0
AC006196.1	0	0	0	0
AC006197.1	0	0	0	0
AC006197.2	0	-0.0953814	0	0.172713
AC006199.1	0	0	0	0
AC006205.1	0	0	0	0
AC006205.2	0	0	0	0
AC006206.1	0	0	0	0
AC006206.2	-0.191919	0.345284	0	0
AC006207.1	0.886039	0.166036	0	0
AC006213.1	-0.0783373	0.0944066	0.445216	0.128045
AC006213.2	0	0	0.461131	0.298391
AC006213.3	0	0	0.499106	0.628577
AC006213.4	-0.143551	0	1.0412	0.788411
AC006213.5	-0.249582	0	-0.293359	0
AC006213.6	0	0	0	-0.0398887
AC006213.7	0	0	0.622462	0.274935
AC006230.1	0.533561	0.285368	0	0
AC006236.1	0	0	0	0
AC006237.1	0	0.211281	0	0.283945
AC006238.1	-0.384685	0	0	-0.17351
AC006238.2	0	0	0	0
AC006249.1	0	0	0.475888	0
AC006252.1	0.544739	-0.355649	0.00378116	0.00325493
AC006254.1	-0.0718114	-0.0371433	0.0521792	-0.0612034
AC006254.2	0	0	0	0
AC006254.3	0	0	0	0
AC006262.1	0	0.23652	0.0247709	0.133232
AC006262.2	-0.180488	-0.604057	0.255606	0.349599
AC006262.3	0	0	0	0
AC006262.4	0	-0.559776	0	0
AC006270.1	0	0	0	0
AC006270.2	0	0	0	0
AC006272.1	0	0	0	0
AC006272.2	0	0	0	0
AC006273.1	0	0.12365	-0.443924	-0.605569
AC006277.1	0	0	-0.0570498	0
AC006288.1	0	0	0	0
AC006296.1	0	0	0	0
AC006296.2	0	0	0	0
AC006296.3	0	0	0	0.0544998
AC006299.1	0	-0.0550378	0.0165943	0
AC006305.1	0	0	0	0
AC006305.2	0	0	0	0
AC006305.3	0	0	0	0
AC006320.1	0	0	0	0
AC006326.1	0	0	0	0
AC006328.1	0	0	0	0
AC006328.2	0	0	0	0
AC006329.1	0	0	0.206161	-0.0240931
AC006330.1	-0.0850925	0	0.0473204	0.0968385
AC006335.1	0	0	0	0
AC006335.2	0	0	0	0
AC006338.1	0	0	0	0
AC006338.2	0	0	0	0
AC006348.1	0	0	0.0467585	0
AC006349.1	0	0	0	0
AC006355.1	0	0	0	0
AC006355.2	0	0	0	0
AC006357.1	0	0	0	0
AC006362.1	0	0	0	0
AC006363.1	0	0	0	0
AC006364.1	-0.0457546	0	0	0
AC006366.1	0	0	0	0
AC006369.1	0.334491	0.263208	0.0978269	-0.0476886
AC006369.2	0	0	0	0
AC006372.1	0	0	0	0
AC006372.2	0	0	0	0.15763
AC006372.3	0	0.203657	0	-0.0207224
AC006372.4	0	0.0709388	0.055508	-0.203959
AC006378.1	0	0	0.167646	0.764787
AC006380.1	0	0	0	0
AC006386.1	0	0	0	0
AC006386.2	0	0	0	0
AC006390.1	0	0	0	0
AC006398.1	0.104918	0	0	0
AC006427.1	0	0	0	0
AC006427.2	0	0	0	-0.0619087
AC006435.1	-0.0718623	0	-0.206401	-0.352519
AC006435.2	0	0.0894041	0.393644	-0.22561
AC006435.3	0	0	0.376456	0.330175
AC006435.4	0	0	0	0
AC006435.5	0	0	0	0
AC006441.1	0	0	0	0
AC006441.2	0	0	0	0
AC006441.3	0	0	-0.985931	-0.809524
AC006441.4	0	0	-0.0922946	0.288368
AC006441.5	0	0	0	0
AC006445.1	0	0	0	0
AC006445.2	0	0	0	0
AC006449.1	0	0	0.145347	0
AC006449.2	1.25273	0.985831	0.817876	-0.148227
AC006449.3	-0.0114854	0.299051	0.564517	-0.996336
AC006449.5	0.290374	0.545408	-0.0184603	0.0563926
AC006449.6	0.682485	0.509741	0.26089	0.354152
AC006449.7	0	0	1.12519	-1.0759
AC006450.1	0	0	-0.161821	-0.172927
AC006450.2	0	0	0	0
AC006450.3	0	0.0500163	0.602085	0.691346
AC006452.1	0	0	-0.00261007	0.059558
AC006453.1	-0.1323	-0.0803983	0	0
AC006453.2	0	0	0	0
AC006453.3	0	0	0	0
AC006453.4	0	0	0	0
AC006455.1	0	0	0	0
AC006455.2	0	0	0	0
AC006455.3	0	0	0	0
AC006455.4	0	0	0	0
AC006455.5	0	0	0	0
AC006455.6	0	0	0	0
AC006455.7	0	0	0	0
AC006455.8	0	0	0	0
AC006457.1	0	0	0	0
AC006458.1	0	0	0	0
AC006459.1	0	0	0	0
AC006460.1	0.030129	-0.13288	0.0150725	-0.0184673
AC006460.2	-0.0114081	0.0754572	0.0206889	0.0212598
AC006463.1	0	0	0	0
AC006466.1	0	0	0	0
AC006478.1	0	0	0	0
AC006478.2	0	0	0	0
AC006480.1	0	0	0	0
AC006480.2	0	0	0.70488	1.11848
AC006482.1	0	0	0	0
AC006483.1	0	0	0	0
AC006483.2	-0.0515804	0	0	0
AC006484.1	0	0	0	0
AC006486.1	0	0	0	0
AC006486.2	0.265987	0.0889883	-0.273685	-0.34059
AC006486.3	0	0	0	0
AC006487.1	-0.0370276	-0.0651206	0	-0.067605
AC006487.2	0	0	0	0
AC006499.1	0	0	0	0
AC006499.2	0	0	0	0
AC006499.3	0	0	0	0
AC006499.4	0	0	0	0
AC006499.5	0	0	0	0
AC006499.6	0	0	0	0
AC006499.7	0	0	0	0
AC006499.8	0	0	0	0
AC006504.1	0	0.0583863	0	0.0237625
AC006504.2	0	0	0	0
AC006504.3	0.34366	-0.796388	0.326865	0.51849
AC006504.4	0	0	0	0
AC006504.5	0.52956	0.298972	0.389791	0.478033
AC006504.6	0	0	0	0
AC006504.7	-0.546118	0.161039	1.61206	1.97532
AC006509.1	0	0	0	0
AC006511.1	0	0	0	0
AC006511.2	0.13406	0	0	0.307188
AC006511.3	-0.143926	0.172968	-0.123334	-0.18921
AC006511.4	0.446757	0	0	0
AC006511.5	0	0	-0.10952	0.0666566
AC006511.6	0	0.0970451	-0.00553783	0.0785526
AC006512.1	0	-0.284917	-0.739414	0
AC006512.2	0	0	-0.180942	0
AC006517.1	0	0	0	0
AC006517.2	0	0	-0.00303182	0.116487
AC006518.1	0	0	0.329675	0.352534
AC006518.2	0	0	0	0
AC006525.1	-0.081245	-0.0227849	0	0
AC006529.1	0	0	0	0
AC006530.1	0	0	0	0
AC006538.1	0.642458	0.597201	0.544879	0.200993
AC006538.2	0	0	0	0
AC006538.3	0	0	-0.148769	-0.0145171
AC006538.4	0	0.0438484	-0.19654	-0.246149
AC006539.1	0	0	0	0
AC006539.2	0	0	0	0
AC006539.3	0	0	0	0
AC006547.1	0	0	-0.0678734	-0.307411
AC006547.2	-0.414586	0.0571655	-0.129581	-0.421152
AC006547.3	0	-0.168084	0.113454	-0.307875
AC006548.1	0	0	0	0
AC006548.2	0	0	0	0
AC006548.3	0	0	0	0
AC006557.1	0	0	0	0
AC006557.2	0	0	0.0701291	0
AC006557.3	0	0	0	0
AC006557.4	0	0	0	0
AC006557.5	0	0	0	0
AC006557.6	0	0	0	0
AC006566.1	0	0	0	0.267268
AC006566.2	0	0	0	0
AC006581.1	0	0	0	0
AC006581.2	0	0	-0.36228	0.156701
AC006600.1	-0.839178	0	0	0
AC006600.2	0	0	0	0
AC006840.1	0	0	0	0
AC006924.1	0	0	0	0
AC006927.1	0	0	-0.176839	0
AC006927.2	0	0	0	0
AC006927.3	0	0	0	0
AC006927.4	0	0	0	0
AC006927.5	0	0	0	0
AC006942.1	0.107092	1.50491	0.946678	-0.768688
AC006946.1	0	0	0	0
AC006946.2	-0.0818485	0.121585	0	0
AC006946.3	0	0	0	0
AC006947.1	0	0	0	0
AC006960.1	0	0	0	0.844666
AC006960.2	0	0	0	0
AC006960.3	0	0.147152	0.0112057	0.10306
AC006963.1	0	0	-0.00410825	0.0698729
AC006967.1	0	0	0	0
AC006967.2	0	0	0	0
AC006967.3	0	0	0.100634	0.498856
AC006970.1	0	0	0	0
AC006970.2	0	0	0	0
AC006971.1	0	0	0.0193344	0
AC006972.1	0	0	0	0
AC006974.1	0	0	0	0
AC006974.2	0	0	-0.00494099	0
AC006978.1	-0.266184	0.0541534	1.80247	1.88851
AC006978.2	0	0	0	0.242243
AC006986.1	0	0	0	0
AC006987.1	0	0	0	0
AC006989.1	0	0	0	0
AC006994.1	-0.0151907	0.0249334	0.0210746	-0.0373995
AC007000.1	0	0	0.907667	0.402403
AC007000.2	0	0	0	0
AC007000.3	0	0	0	0
AC007001.1	0	0	0	0
AC007003.1	0	0	0	0
AC007009.1	0.631171	0.0410913	0.136388	0.424188
AC007012.1	0	0	0	0
AC007012.2	0	0	0	0
AC007014.1	0	0	0	0
AC007014.2	0.342951	0	-0.470036	-0.166449
AC007016.1	0	0	0	0
AC007029.1	0	0	-0.271999	0
AC007032.1	0.782789	0.660915	-0.148786	0.319224
AC007036.1	0	0	0	0
AC007036.2	0	0	0	0.309086
AC007036.3	0	0	0	0
AC007036.4	0	0	0	0
AC007036.5	0.0809554	0	0.114563	0.0389114
AC007038.1	0.120153	-0.256647	1.21644	1.21536
AC007040.1	0	0	1.19185	0.155313
AC007040.2	-0.0927898	0.0150431	-0.0742692	0.12931
AC007040.3	0	0	-0.510991	0.654478
AC007064.1	0	0	0	0
AC007064.2	0	0	-0.149523	0
AC007064.3	0	0	0	0
AC007064.4	0	0	0	0
AC007066.1	0	0	-0.193217	0
AC007066.2	-0.370741	-0.112128	0.839931	0.728492
AC007066.3	-0.416539	0.551756	0.51698	0.0362367
AC007091.1	0	0	0.109232	0
AC007092.1	0	0	0	0
AC007098.1	0.032324	0	-0.1225	0.0225493
AC007099.1	0.217488	0.383716	0	0
AC007099.2	0	0	0	0
AC007099.3	0	0	0	0
AC007100.1	0	0	0	0
AC007100.2	0	0	0	0
AC007106.1	0	-0.0265607	0.0673545	-0.0846583
AC007106.2	0	0	0	0
AC007114.1	0.951546	-0.0205525	-0.126536	0.196991
AC007114.2	0	0	0	0
AC007115.1	0	0	0	0
AC007126.1	0	0	0	0
AC007128.1	-0.41201	-0.0528206	0.286255	0.643985
AC007128.2	0.155317	0.290602	-0.962562	0.425802
AC007130.1	0	0	0.801264	0
AC007132.1	0	0	0	0
AC007136.1	0	0	0	0
AC007151.1	0	0	0	0
AC007159.1	0	0	0	0
AC007160.1	0	0	0	0
AC007161.1	0	0	0	0
AC007161.2	0	0	0	0
AC007161.3	0	0	0.255712	0
AC007179.1	0	0	0	0
AC007179.2	0	0	0	0
AC007179.3	0	0	0	0
AC007182.1	-0.035896	0	-0.0443723	-0.0450899
AC007182.2	0	0.24892	-0.403912	0
AC007182.3	0	0	0	0
AC007191.1	0.0989194	0.10959	-0.221783	-0.647943
AC007192.1	0	0.0210854	0.0809947	-0.0175137
AC007192.2	-0.160246	0.223996	0.18066	0.392735
AC007193.1	0	0	0	0
AC007193.2	0	0	0	0
AC007193.3	-0.366611	0.601076	-0.660713	-0.698815
AC007204.1	0	0	0	0
AC007204.2	0	0	0	0
AC007207.1	0	0	0	0
AC007215.1	0	0	0	0
AC007216.1	0	0	0	0
AC007216.2	0	0	-0.191804	0
AC007216.3	0	-0.0678952	0.318788	-0.0621575
AC007216.4	0.396528	0	-0.14797	0
AC007216.5	0	0	0	0
AC007218.1	0	0	0	0
AC007218.2	0	0	0	0
AC007218.3	0	0	0	0
AC007220.1	0	-0.0952939	0	-0.10619
AC007220.2	0	0	0	0
AC007221.1	0	0	0	0
AC007222.1	0	0	0	0
AC007222.2	0	0	0	0
AC007223.1	0	0	0	0
AC007224.1	0	0	0	0
AC007224.2	0	0	0.161791	-0.32107
AC007225.1	0	0	-0.0365625	-0.0528786
AC007225.2	0	0	0	0
AC007237.1	0	0	0	0
AC007238.1	-0.0443829	0	-0.0445508	-0.0479414
AC007240.1	0	0	0	0
AC007240.2	0	0	0	0
AC007240.3	-0.0545701	0.483557	0.368333	0.0278063
AC007241.1	0	0	0	0
AC007241.2	0	0	0	0
AC007250.1	1.20254	0.975252	1.06366	1.45326
AC007253.1	0	0	0	0.0955655
AC007255.1	1.19009	0.725595	-0.17415	0.408716
AC007262.1	0	0	0	0
AC007262.2	0.0214035	0	0.019697	0.0973418
AC007269.1	0	0	0	0
AC007271.1	0	0	0	0
AC007272.1	0	0	0	0
AC007274.1	0	0	0	0
AC007274.2	0	0	0	0
AC007274.3	0	0	0	0
AC007275.1	0	0	0	0
AC007277.1	0	0	-0.103247	0.0726705
AC007277.2	0	0	0	0
AC007278.1	0	0	0	0
AC007278.2	0	0	0	0
AC007279.1	0.0600997	0.0542563	0.211029	0.204887
AC007283.1	0	0	0	0
AC007285.1	0	0	0	0
AC007292.1	0.727911	0.626976	0.620547	0.00182686
AC007292.2	0.114873	0.00280378	0.0445079	-0.288812
AC007292.3	0.0708144	0.285416	-0.205323	0.488807
AC007298.1	0	0	0	0
AC007298.2	0	0	0	0
AC007308.1	0	0	0	0
AC007312.1	0	0	0	0
AC007314.1	0	-0.153747	0.854896	0.890149
AC007317.1	0	0.0436056	0	0
AC007317.2	0	0	0	0
AC007318.1	0.243044	0.351305	0.414104	-0.137017
AC007319.1	0.319725	0.464064	0.126299	-0.439481
AC007322.1	0	0	0	0
AC007322.2	0	0	0	0
AC007322.3	0	0	0	0
AC007322.4	0	0	0	0
AC007326.1	0	0	0	0.18006
AC007326.2	0	0	0	0
AC007326.3	0	0	0	0
AC007326.4	0	0	0	0
AC007326.5	0	0	0	0
AC007327.1	0	0	0	0
AC007327.2	0	0	0	0
AC007333.1	0	0	0	0
AC007333.2	0	0	0	0
AC007336.1	0	0	0.0897913	0.12551
AC007336.2	0	0	0	0
AC007336.3	0	0	0	0
AC007342.1	0	0	0.232627	0
AC007342.2	0	0	0	0
AC007342.3	0	0	0	0.0173217
AC007342.4	0.443961	-0.0304215	-0.0656913	0
AC007342.5	0.137655	-0.0885404	0	0.0742247
AC007342.6	0	0	0.0332748	0.0334695
AC007342.7	-0.188586	-0.163065	0.364612	0.312606
AC007342.8	0	0	0	0
AC007342.9	0.0761706	0	0	0
AC007343.1	0	0	0	0
AC007344.1	0	0	0.0332771	0.113923
AC007346.1	0	0	0	0
AC007346.2	0	0	0	0
AC007347.1	0	0	0	0
AC007347.2	0	0	0	0
AC007349.1	0	0	0	0
AC007349.2	0	0	0	0
AC007349.3	0	0	0	0
AC007349.4	0	0	0	0
AC007350.1	0	0	0	0
AC007351.1	0	0	0	0
AC007351.2	0	0	0	0
AC007351.3	0	0	0	0
AC007351.4	0	0	0	0
AC007359.1	0	0	0	0
AC007362.1	0	0	-0.0477368	0
AC007363.1	0	0	0	0
AC007365.1	0	0	-0.016938	-0.131759
AC007368.1	0	0	0	0
AC007370.1	0	0	0	0
AC007370.2	0	0	0	0.0276893
AC007375.1	0	0	0	0
AC007375.2	0	0	0	0
AC007375.3	0.130681	-0.0665094	0.414709	0.13899
AC007376.1	0	0	0	-0.255763
AC007376.2	0.35401	0.194104	0.606995	-0.171646
AC007378.1	0	0	0.172	0.327386
AC007381.1	0	0	0	0
AC007382.1	0	0	0	0
AC007383.1	0.486416	1.08952	0.0923098	-0.0747835
AC007383.2	0	0	0.123235	0
AC007383.3	0	0	0	0
AC007384.1	0	0	0	0
AC007387.1	-0.0534537	0	-0.0536552	0
AC007387.2	0	0	0	0.0391455
AC007389.1	-0.0233679	0.0014992	0	-0.00798872
AC007389.2	0	0	-0.0554952	0
AC007389.3	0.601573	0.135069	0.115057	0
AC007390.1	0	0.029204	0.0928144	0.0612936
AC007391.1	0	0	-0.261388	0.650357
AC007391.2	0	0	0.10026	0.170505
AC007391.3	0	0	0	0
AC007402.1	0	0	0	0
AC007402.2	0	0	0	0
AC007403.1	0	0	0	0
AC007405.1	0.0038832	-0.0443214	-0.0263037	-0.00666423
AC007405.2	0.130955	-0.0198878	0.0579158	0.0982794
AC007405.3	-0.12708	0.108805	0.947333	0.495956
AC007405.4	0	0	0	-0.45269
AC007406.1	0	0	0	0
AC007406.2	0	0	0	0
AC007406.3	0	0.0894153	0	0
AC007406.4	-0.5034	-0.237709	0.274608	0.773681
AC007422.1	0	0	0	0
AC007423.1	0	0	-0.0960903	0
AC007431.1	0	0	0	0
AC007431.2	0	0	0	0
AC007431.3	0	0	0	0
AC007432.1	0	0	0	0
AC007435.1	0	0	0.411746	1.44436
AC007448.1	0	0	0	0
AC007448.2	0	0	0	0
AC007448.3	0	0	-0.517086	-0.239246
AC007448.4	0.55344	0.131968	0.33931	-0.00892987
AC007448.5	0.112492	-0.0706061	0.373075	0.153854
AC007450.1	0	0	0	0
AC007450.2	0	0	0	0
AC007450.3	0	0	0	0
AC007450.4	0	0	0	0.500873
AC007458.1	0	0	0	0
AC007461.1	0	0	0.0395619	0.0730611
AC007463.1	0	0	0	0
AC007463.2	0	0	0	0
AC007483.1	0	0	0	0
AC007485.1	0	0	1.13706	0
AC007485.2	-0.594741	-0.103706	1.231	1.49859
AC007490.1	0	0	0	0
AC007491.1	0	0	0.0335908	-0.0372296
AC007493.1	0	0	0	-0.0165149
AC007493.2	0.210502	0	0	0.149539
AC007494.1	0	0	0	0
AC007494.2	0	0	0	0
AC007494.3	0	0	0	0
AC007495.1	0	0	0	0
AC007496.1	0	0	0	0
AC007496.2	0	0	0	0
AC007496.3	0	0	0	0
AC007497.1	-0.00474518	0	0.519801	0
AC007497.2	0	0	0	0
AC007511.1	0	0	0	0
AC007513.1	0	0	0	0
AC007527.1	0.474811	0.177567	0	0
AC007527.2	0	0	0	0
AC007528.1	0	0	0	0
AC007529.1	0	0	0	0
AC007529.2	0	-0.319448	0	0
AC007533.1	0	0	0	0
AC007535.1	0	0	0	0
AC007536.1	0	0	0	0
AC007537.1	0	0	0	0
AC007540.1	0	0	0.165847	0
AC007541.1	-0.145211	0.0761234	0.478164	0.290196
AC007546.1	0	0	-0.0879665	0.568004
AC007546.2	0	0	0.418185	0.420332
AC007546.3	0	0	0.0352414	-0.0559332
AC007547.1	0	0	0	0
AC007547.2	0	0	0	0
AC007551.1	0	0.196436	0	0.160026
AC007551.2	0	0	0	0
AC007552.1	0	0	0	0
AC007552.2	0.146111	0	0	0
AC007556.1	0	0	0	0
AC007557.1	0	0	0	0
AC007557.2	0	0	0	0
AC007557.3	0	0	0	0
AC007557.4	0	0	0	0
AC007559.1	0	0	0	0
AC007560.1	0	0	-0.29911	0
AC007562.1	0	0	0	0
AC007563.1	0	0	0.528891	0
AC007563.2	0	0	0	0.242261
AC007563.3	0	0	0	0
AC007566.1	-0.0833204	-0.0496216	0.264416	0.484359
AC007566.2	0	0	0	0
AC007568.1	0	0	0	0
AC007569.1	0	0	0	0
AC007570.1	0.278776	0.455618	0.118835	-0.256152
AC007595.1	0	0	0	0
AC007598.1	0	0	0	0
AC007598.2	0	0	0	0
AC007598.3	0	0	0	0
AC007599.1	0	0	0	0
AC007599.2	0	0	0	0
AC007601.1	0	0	0	0
AC007601.2	0	0	0	0
AC007603.1	0	0	0	0
AC007603.2	0	0	0	0
AC007608.1	0	0	0.0728451	0.12823
AC007608.2	0	0	0	0
AC007608.3	-0.0118714	0	0.00405924	0.0450527
AC007608.4	0	0	0	0
AC007610.1	0	0	-0.427587	-0.577035
AC007610.2	0	0	0.0118097	-0.388191
AC007610.3	0	0	0	0
AC007610.4	-0.0720273	0	0.124646	0.415301
AC007610.5	0	0	0	0.0774442
AC007611.1	0.391034	0.381333	0.579194	0.184661
AC007613.1	0.0164065	-0.2775	0.0500826	-0.0520876
AC007614.1	0	0	0	0.0246191
AC007614.2	0	0	0	0
AC007618.1	0	0	0	0
AC007619.1	0	0	0	-0.19179
AC007619.2	0	0	0	0
AC007620.1	0	0	0	0
AC007620.2	0	0	-0.14556	0.259678
AC007620.3	0	0	0	0
AC007621.1	0	0	0	0
AC007622.1	0	0	0	0
AC007622.2	0	0	0	0.0627996
AC007631.1	0	0	0	0
AC007637.1	0.114388	0.115287	0.0947412	-0.355452
AC007638.1	0	0	0	0
AC007638.2	0	0.0630802	0	0
AC007639.1	0	0.128766	0	0
AC007649.1	0	0	0	0
AC007652.1	0	0	0	0
AC007652.2	0	0	0	0
AC007652.3	0	0	0	0
AC007655.1	0.832461	0	0	0
AC007655.2	0.0474286	-0.0351226	0.0822521	-0.0230669
AC007656.1	0	0	0	0
AC007656.2	0	0	0	0
AC007656.3	0	0	0	0
AC007656.4	0	0	0	0
AC007663.1	0.0228857	0.0941133	0.22608	-0.0904858
AC007663.2	0.212632	0	0.183742	0.2945
AC007663.3	0	0	-0.507631	-0.108423
AC007663.4	-0.561116	0.0547796	-0.508186	-0.749779
AC007666.1	-0.048015	0	-0.0227327	0.222745
AC007666.2	0	0	0.111965	0
AC007671.1	0	0	0	0
AC007673.1	0	0	0	0
AC007679.1	0	0	0	0
AC007681.1	-0.0226461	0	0.13401	0.356869
AC007682.1	0	0	0	0
AC007683.1	0.172557	0	0	0
AC007683.2	0	0	0	0
AC007684.1	0	0	0	0
AC007684.2	0	0	0.17234	0
AC007686.1	0	0	0	0
AC007686.2	0	0	0	0
AC007686.3	0.120099	0.556486	0.174128	-0.0508518
AC007686.4	0.0294556	0.0755466	0	0
AC007686.5	0	0	0	0
AC007687.1	0.037262	0.0686173	0.133195	0.0871377
AC007688.1	0	0	0	0
AC007688.2	-0.193237	0	-0.118442	0.111317
AC007688.3	0	0	0	0
AC007690.1	0	0	0	0
AC007695.1	-0.0244797	0.029495	-0.0239717	0.0818202
AC007718.1	0	0	0	0
AC007728.1	0	0	0	0
AC007728.2	0	0	0.0503393	0.0435231
AC007728.3	-1.07578	-0.346461	0	0.439007
AC007731.1	0	0	0	0
AC007731.2	0	0	0	0
AC007731.3	0	0	0	0
AC007731.4	0	0	0	-0.348096
AC007731.5	0	0	0	0
AC007736.1	0	0	0	0
AC007741.1	0	0	0	0
AC007742.1	0	0	0	0
AC007743.1	0.0487574	0.0296367	0	0
AC007744.1	0	0	0	0
AC007749.1	0	0	0	0
AC007749.2	0	0	0	0
AC007750.1	0	0	0	0
AC007751.1	0	0	0	0
AC007773.1	0.762361	0.213552	0.517803	0.46165
AC007780.1	-0.187006	0.151911	0.379077	0.472944
AC007785.1	0	0.651842	0	0
AC007785.2	0	0	0	0.0387827
AC007785.3	0	0.0665019	0.291209	0.388282
AC007786.1	-0.20179	0.185829	0.144994	0.211878
AC007786.2	-0.114503	0	-0.176262	-0.118171
AC007786.3	0	0	-0.242725	0
AC007786.4	0	0	0	0
AC007787.1	0	0	0	0
AC007787.2	0	0	-0.132936	0.737795
AC007792.1	0	0	0.202333	0
AC007795.1	0	0	0	0
AC007823.1	0.113808	0	0.144057	0.194627
AC007834.1	0	0	0.117485	0.115872
AC007834.2	0	0	0	-0.227472
AC007842.1	-0.0461841	0	0.263575	0.492674
AC007846.1	-0.0424615	0.0603321	0	0.0407776
AC007846.2	0	0	0	0
AC007848.1	0.075114	0	0	0
AC007848.2	0	0	0	0
AC007849.1	0	0	0.164014	0
AC007861.1	0	0	0	0
AC007861.2	0	0	0	0
AC007876.1	0	0	0	0
AC007877.1	0	0	0	0
AC007878.1	-0.0580681	0	0.750398	0.517816
AC007879.1	0	0	0	0
AC007879.2	0	-0.29939	0	0.104585
AC007879.3	0.0822849	0	0	0
AC007879.4	0	-0.435101	0	0
AC007879.5	0	0	0	0
AC007880.1	0.0607481	0	0	0
AC007881.1	0	0	0	0.406618
AC007881.2	0	0	0	0
AC007881.3	0.678705	-0.446551	0.415503	-0.0991893
AC007881.4	0	0	0	0
AC007906.1	0	0	0.164926	0.268703
AC007906.2	0.462956	0.495898	0.093962	0.32393
AC007907.1	0	0	0	0
AC007919.1	0	0	0	0
AC007919.2	0	0	0	0
AC007920.1	0	0	0.0329449	0
AC007920.2	0	0	0	0
AC007922.1	0	0	0	0.179691
AC007922.2	0	0	0.28665	0.455821
AC007922.3	0	0	0	0
AC007922.4	0	0	0	0
AC007923.1	-0.178039	-0.813164	0	0
AC007923.2	0	0	0	0
AC007923.3	0	0	0	0
AC007938.1	0	0	0	0
AC007938.2	0	0	0	0
AC007938.3	0	0	-0.353453	0.116093
AC007938.4	0	0	0	0
AC007938.5	0	0	0	0
AC007938.6	0	0	0	0
AC007948.1	0	0	0	0
AC007950.1	0	0	0	0
AC007950.2	0.190966	-0.0810197	0.034626	0.0170961
AC007952.1	0	0	0.0589167	0
AC007952.2	0.0319639	0.145806	0.13271	-0.0320516
AC007952.3	0	0.15219	0	0
AC007952.4	0.375737	0.0179198	-0.511045	0.0235385
AC007952.5	0	0	0	0
AC007952.6	0	0	-0.140301	-0.215193
AC007952.7	0	0	0	0
AC007952.8	0	0	0	0
AC007952.9	0	0	0	0
AC007953.1	0	0	0	0
AC007953.2	0	0	0	0
AC007954.1	0	0	0	0
AC007956.1	0	0	0	0
AC007956.2	0	0	0	0
AC007967.1	0	0	0	0
AC007967.2	0	0	0	0
AC007967.3	0	0	0	0
[truncated: 57,414 more rows]
